# Supplementary material
Source: PubMed Central journal article supplement (PMC6295231)
Supplement: NIHMS1506048-supplement-2.pdf [file NIHMS1506048-supplement-2.pdf]

Supplementary Table 1. List of genes  $\geq 2$ -fold elevated in vehicle vs. KCI807

| Vehicle vs. KCI807 |                         |
|--------------------|-------------------------|
| ID                 | GeneID                  |
| TC1300008909.hg.1  | spertabo                |
| TC1000008643.hg.1  | SCD                     |
| TC0300007057.hg.1  | kofarbo                 |
| TC1600011281.hg.1  | snasney                 |
| TC1700010911.hg.1  |                         |
| TC0300012528.hg.1  | ferdybu                 |
| TC0100006992.hg.1  |                         |
| TC0800008857.hg.1  | MIR1206                 |
| TC1100009682.hg.1  | stertobo                |
| TC0500008769.hg.1  | plusleyby               |
| TC0800011228.hg.1  | speeshor                |
| TC1000007389.hg.1  | RNU6-1170P              |
| TC0900007017.hg.1  |                         |
| TC0200009757.hg.1  |                         |
| TC0900006943.hg.1  |                         |
| TC0300013171.hg.1  | NLGN1-AS1               |
| TC2100007085.hg.1  | dorbaw                  |
| TC1700007729.hg.1  | CTD-2206N4.5            |
| TC1400010704.hg.1  | CRIP1                   |
| TC0300008084.hg.1  | worbabo                 |
| TC0100015789.hg.1  | POGZ                    |
| TC0100013288.hg.1  | wolee                   |
| TC0400012718.hg.1  |                         |
| TC1300006462.hg.1  | RP11-301J16.7; zeedeyby |
| TC0600012563.hg.1  | flafloby                |
| TC0600012654.hg.1  | COQ3                    |
| TC1000008072.hg.1  | boysmoy                 |
| TC1700007167.hg.1  | snovybu                 |
| TC1200007626.hg.1  | METTL7A                 |
| TC0700010960.hg.1  | TCONS_l2_00026555       |
| TC0400012907.hg.1  | ADGRA3                  |
| TC1900009050.hg.1  |                         |
| TC1300008337.hg.1  | AL161422.1              |
| TC1400008084.hg.1  | snarpar                 |
| TC1200008545.hg.1  | snerbleybu              |
| TC0600012435.hg.1  | snorrawby               |
| TC0400010179.hg.1  | RP11-84N19.1            |
| TC1600006576.hg.1  | SNORA78; SNHG9          |
| TC1900011607.hg.1  | mutybu                  |

|                   |                |
|-------------------|----------------|
| TC0200012563.hg.1 | AC007560.2     |
| TC0100013067.hg.1 | flyweybo       |
| TC0900008205.hg.1 |                |
| TC0700012267.hg.1 |                |
| TC0500012258.hg.1 | AC005609.20    |
| TC1000009388.hg.1 |                |
| TC0400011621.hg.1 | wosnawby       |
| TC0700008615.hg.1 | gerblaby       |
| TC0500012062.hg.1 | slawstorby     |
| TC1700008147.hg.1 |                |
| TC1200006580.hg.1 | varcho         |
| TC0100010657.hg.1 |                |
| TC1700010219.hg.1 | lonaw          |
| TC0600007321.hg.1 |                |
| TC1600010519.hg.1 | RP11-354I13.1  |
| TC1700007241.hg.1 | RP11-283C24.1  |
| TC1200010680.hg.1 | jodeyby        |
| TC1200010568.hg.1 | korflabu       |
| TC0700011467.hg.1 | veecheebu      |
| TC0100012297.hg.1 |                |
| TC0800008064.hg.1 | RP11-48B3.4    |
| TC1100010716.hg.1 | charloby       |
| TC1400008615.hg.1 | NDRG2; MIR6717 |
| TC1100010181.hg.1 | smawflerbu     |
| TC1500010024.hg.1 | SNORD77        |
| TC0400007939.hg.1 | lergar         |
| TC1300008939.hg.1 | pleyspor       |
| TC1100007486.hg.1 |                |
| TC1800008512.hg.1 | MIR924HG       |
| TC0300013173.hg.1 |                |
| TC0200013628.hg.1 | sherjybu       |
| TC1000007416.hg.1 | deymar         |
| TC0X00009072.hg.1 |                |
| TC1400008961.hg.1 |                |
| TC0200015561.hg.1 |                |
| TC1200012090.hg.1 | AC068799.1     |
| TC1700010677.hg.1 | KRT19          |
| TC0100011827.hg.1 |                |
| TC1300007189.hg.1 |                |
| TC0700012472.hg.1 |                |
| TC0900010309.hg.1 | klawboby       |
| TC1500009280.hg.1 | RP11-109D20.2  |
| TC0700010648.hg.1 |                |

|                   |              |
|-------------------|--------------|
| TC0X00009828.hg.1 | skerber      |
| TC0X00009830.hg.1 | toby         |
| TC0400007830.hg.1 | ALB          |
| TC1000010843.hg.1 | PBLD         |
| TC0400006566.hg.1 | teyglu       |
| TC1700011256.hg.1 | suvoybu      |
| TC1700008969.hg.1 | RNU6-97P     |
| TC0600009969.hg.1 | swyjee       |
| TC1000010176.hg.1 | MIR604       |
| TC1100012428.hg.1 | pkinase.69   |
| TC0900010471.hg.1 | bloteeby     |
| TC0600009966.hg.1 | sluklerby    |
| TC0100008959.hg.1 |              |
| TC0700010829.hg.1 |              |
| TC1100007434.hg.1 | RP11-702F3.1 |
| TC0300013183.hg.1 |              |
| TC0900010080.hg.1 | smuzaby      |
| TC0500007719.hg.1 |              |
| TC0500011018.hg.1 | beespoybu    |
| TC0600010013.hg.1 | skoflarby    |
| TC0800007106.hg.1 | titimu       |
| TC1500007107.hg.1 | SORD         |
| TC1600007895.hg.1 | glary        |
| TC1800007947.hg.1 |              |
| TC1200011677.hg.1 | Y_RNA        |
| TC0400011000.hg.1 | soso         |
| TC0100015156.hg.1 |              |
| TC0700007351.hg.1 | vuku         |
| TC0X00009721.hg.1 | SSXP1        |
| TC2200006905.hg.1 | CRIP1P4      |
| TC0300007102.hg.1 | AC099332.1   |
| TC0800009271.hg.1 | AC084125.1   |
| TC1700009188.hg.1 | AC139530.1   |
| TC0100013140.hg.1 | smeeleybu    |
| TC1900010222.hg.1 |              |
| TC0600006713.hg.1 |              |
| TC2000006451.hg.1 |              |
| TC1700007030.hg.1 | storver      |
| TC1200010594.hg.1 |              |
| TC1100010877.hg.1 |              |
| TC0500008137.hg.1 | karsnobu     |
| TC0X00007989.hg.1 | LOC100287793 |
| TC2200008579.hg.1 | terru        |

|                                    |                   |
|------------------------------------|-------------------|
| TC0200009812.hg.1                  | AC009299.4        |
| TC1800008605.hg.1                  | PIAS2             |
| TC1700007636.hg.1                  | PIGW              |
| TC1600010349.hg.1                  | wersno            |
| TC0400010677.hg.1                  | AC119751.4        |
| TC1500008752.hg.1                  | spaswo            |
| TC0Y00006885.hg.1                  | bybar             |
| TC1500008138.hg.1                  | rurumi            |
| TC0600011435.hg.1                  | SNORD117          |
| TC1200012147.hg.1                  | plyflawby         |
| TC2100007088.hg.1                  | suver             |
| TC1100010514.hg.1                  | ELF5              |
| TSUnmapped00000981.hg.1            |                   |
| TC2100007060.hg.1                  |                   |
| TC1700009419.hg.1                  | skeeboy           |
| TC0X00008382.hg.1                  |                   |
| TC1200006604.hg.1                  | CD9               |
| TC0700012526.hg.1                  | AC010655.1        |
| TC1700010029.hg.1                  | pawroy            |
| TC0700012694.hg.1                  |                   |
| TC1_KI270706v1_random00006439.hg.1 | RP11-782C8.2      |
| TC0300012193.hg.1                  | fleebeebu         |
| TC1700011283.hg.1                  | MIR454            |
| TC1100007432.hg.1                  |                   |
| TC2000008983.hg.1                  | RNU6-759P         |
| TC2200006468.hg.1                  | LL22NC03-N14H11.1 |
| TC0900007633.hg.1                  |                   |
| TC0400011649.hg.1                  | lugar             |
| TC0200007246.hg.1                  |                   |
| TC1700010994.hg.1                  | skozy             |
| TC0100015208.hg.1                  | bawbor            |
| TC0100011542.hg.1                  | kawreybu          |
| TC0600013642.hg.1                  | peefla            |
| TC0100015260.hg.1                  | nureebo           |
| TC1100009291.hg.1                  | kesimi            |
| TC1700008113.hg.1                  | stamar            |
| TC0600011141.hg.1                  |                   |
| TC0600013165.hg.1                  | EPB41L2           |
| TC1700010352.hg.1                  |                   |
| TC0900009405.hg.1                  |                   |
| TC1500007099.hg.1                  | CTD-2008A1.1      |
| TC0800010300.hg.1                  | Y_RNA             |

|                   |                    |
|-------------------|--------------------|
| TC0200016626.hg.1 | MBOAT2             |
| TC0700011735.hg.1 | AC002064.4; gokar  |
| TC1000007657.hg.1 |                    |
| TC1700007900.hg.1 | skoypla            |
| TC0700008112.hg.1 |                    |
| TC1700010245.hg.1 | RNU6-711P          |
| TC0600007822.hg.1 | nyspabu            |
| TC1700007465.hg.1 | CTD-2349P21.3      |
| TC0400006441.hg.1 | warsweeby          |
| TC0100010273.hg.1 | jygeybu            |
| TC0300007749.hg.1 | AC099326.1         |
| TC0900007227.hg.1 | cheyshy            |
| TC0500007145.hg.1 | SKP2               |
| TC0600012174.hg.1 |                    |
| TC0100013002.hg.1 | RP4-680D5.8        |
| TC1000008771.hg.1 | chorkleebu         |
| TC0200011253.hg.1 | smeedoybu          |
| TC1100008700.hg.1 |                    |
| TC0500009612.hg.1 | jeyskeyby          |
| TC1200008786.hg.1 | jarnar             |
| TC0400009293.hg.1 | swospuby           |
| TC0100008388.hg.1 | mywybo             |
| TC1100010229.hg.1 | SNORD14A           |
| TC1100012004.hg.1 | RP11-685N10.1      |
| TC0900010668.hg.1 | RP11-345K9.3       |
| TC0800011174.hg.1 | Y_RNA              |
| TC1000009923.hg.1 |                    |
| TC1400008203.hg.1 |                    |
| TC0500009608.hg.1 | skugoy             |
| TC0300006843.hg.1 | skarveebo          |
| TC0600012276.hg.1 | pluglybu           |
| TC0100007762.hg.1 | swarrarbu          |
| TC0200014262.hg.1 |                    |
| TC0700012444.hg.1 | CADPS2             |
| TC1600007473.hg.1 | AC002310.12        |
| TC2200008867.hg.1 | gyrer              |
| TC1500007564.hg.1 | AC100830.4         |
| TC0100013707.hg.1 |                    |
| TC0400012507.hg.1 |                    |
| TC1800008178.hg.1 |                    |
| TC1000007495.hg.1 | blusmar; charlerby |
| TC1700008623.hg.1 | RP11-927P21.2      |
| TC1100012680.hg.1 |                    |

|                   |                                                  |
|-------------------|--------------------------------------------------|
| TC0700013103.hg.1 | AC104692.1                                       |
| TC0200014994.hg.1 | RNU6-1; RNU6-9; RNU6-7; RNU6-8; RNU6-2; RNU6-5P  |
| TC0700012465.hg.1 | RNU6-1; RNU6-9; RNU6-7; RNU6-8; RNU6-2; RNU6-11P |
| TC0X00010986.hg.1 | RNU6-1; RNU6-9; RNU6-7; RNU6-8; RNU6-2; RNU6-3P  |
| TC1400008874.hg.1 | RNU6-8                                           |
| TC1500009854.hg.1 | RNU6-1                                           |
| TC0700008611.hg.1 | speekar                                          |
| TC0300008399.hg.1 |                                                  |
| TC0300010502.hg.1 |                                                  |
| TC0100007947.hg.1 | pakoybu                                          |
| TC0800010598.hg.1 | AC022182.2                                       |
| TC0800010183.hg.1 | sheeshor                                         |
| TC0200010375.hg.1 |                                                  |
| TC0200009256.hg.1 |                                                  |
| TC0600009854.hg.1 | bospeybu                                         |
| TC0500008007.hg.1 |                                                  |
| TC0400010665.hg.1 | RP11-241F15.3                                    |
| TC0500008812.hg.1 | RNA5SP195                                        |
| TC0700008039.hg.1 | AC004878.8; perchyby                             |
| TC0800006964.hg.1 |                                                  |
| TC0500007714.hg.1 | borspoybu                                        |
| TC0100010594.hg.1 | Z98750.1                                         |
| TC0200015623.hg.1 | gleygobu                                         |
| TC0300008048.hg.1 | flersworby                                       |
| TC0200014815.hg.1 | Y_RNA                                            |
| TC1900010041.hg.1 | guchor                                           |
| TC0X00011233.hg.1 |                                                  |
| TC0400010183.hg.1 |                                                  |
| TC1700011651.hg.1 | zoywey                                           |
| TC0300006889.hg.1 | RP11-222K16.2                                    |
| TC0200015837.hg.1 | RP11-16P6.1                                      |
| TC0800007015.hg.1 | glaweyby                                         |
| TC0200011267.hg.1 | mihi                                             |
| TC0200013454.hg.1 | SNX18P14                                         |
| TC0100014975.hg.1 | LOC100289636                                     |
| TC1200011703.hg.1 |                                                  |
| TC1200008845.hg.1 | RAD9B                                            |
| TC0800011319.hg.1 |                                                  |
| TC1700007442.hg.1 | AC104996.1                                       |
| TC0500009196.hg.1 |                                                  |
| TC0300009549.hg.1 | MIR4789                                          |
| TC0300013172.hg.1 |                                                  |
| TC2000007301.hg.1 | batey                                            |

|                   |                                      |
|-------------------|--------------------------------------|
| TC0800008110.hg.1 |                                      |
| TC1200007757.hg.1 | RP11-968A15.8                        |
| TC1200009037.hg.1 | plofluby                             |
| TC1300008742.hg.1 | RP11-187A9.3                         |
| TC1300006829.hg.1 |                                      |
| TC0100015672.hg.1 | RNU2-38P                             |
| TC1200010110.hg.1 | KCNJ8                                |
| TC1200011910.hg.1 |                                      |
| TC1600008164.hg.1 | FAM65A                               |
| TC0100014408.hg.1 | DOCK7                                |
| TC0300009215.hg.1 | reyfawbu                             |
| TC0300013653.hg.1 |                                      |
| TC0300012247.hg.1 | RP11-775J23.2                        |
| TC0900008704.hg.1 | U7                                   |
| TC0700011343.hg.1 |                                      |
| TC1000009687.hg.1 | zerrarby                             |
| TC0800006916.hg.1 | SH2D4A                               |
| TC0200007468.hg.1 |                                      |
| TC1000008401.hg.1 | IFIT5                                |
| TC0900010609.hg.1 | skesyher                             |
| TC1300008236.hg.1 | zyshawbu                             |
| TC0800012438.hg.1 | LOC101929709; RP11-37B2.1; smarzeeby |
| TC1200008639.hg.1 |                                      |
| TC0500007261.hg.1 |                                      |
| TC0300010623.hg.1 |                                      |
| TC0200012797.hg.1 | AC016734.2                           |
| TC0900006986.hg.1 | ANKRD18B                             |
| TC1200006817.hg.1 |                                      |
| TC1100011896.hg.1 | RNU6-16P                             |
| TC1800007081.hg.1 | MIR3975                              |
| TC0200010968.hg.1 |                                      |
| TC0200013622.hg.1 | chujybu                              |
| TC0800007709.hg.1 | RNU6-13P                             |
| TC0800008657.hg.1 | RNU6-12P                             |
| TC2200009223.hg.1 | LL22NC03-30E12.13                    |
| TC2200008774.hg.1 | bluraw                               |
| TC2000007433.hg.1 |                                      |
| TC1200010860.hg.1 |                                      |
| TC1100010218.hg.1 | spukorby                             |
| TC1000011279.hg.1 |                                      |
| TC0700012529.hg.1 | neyblawby                            |
| TC0600007263.hg.1 | HIST1H4A                             |
| TC0200006521.hg.1 |                                      |

|                   |                   |
|-------------------|-------------------|
| TC0100017038.hg.1 |                   |
| TC0900007156.hg.1 | flarsarby         |
| TC1400006464.hg.1 | neymy             |
| TC0300011345.hg.1 | Y_RNA             |
| TC1400006462.hg.1 | deysly; leycharbu |
| TC0100010518.hg.1 | DCAF6             |
| TC1500008525.hg.1 | poychubu          |
| TC0100014661.hg.1 | snerneebu         |
| TC0800010716.hg.1 | C8orf34-AS1       |
| TC0900009874.hg.1 | nawsoby           |
| TC0300008287.hg.1 |                   |
| TC0600007231.hg.1 | LRRC16A           |
| TC0800007966.hg.1 | RP11-463D19.1     |
| TC0900007494.hg.1 | FXN               |
| TC1200010473.hg.1 | AC107018.1        |
| TC0300010870.hg.1 | kerfeebo          |
| TC0700006984.hg.1 | SNX10             |
| TC0800007577.hg.1 | AC013701.1        |
| TC1000010856.hg.1 |                   |
| TC2200006848.hg.1 | PCAT14            |
| TC0500007531.hg.1 | PDE4D             |
| TC0700006917.hg.1 | SNORD65           |
| TC0X00010522.hg.1 | bleebu            |
| TC0300006849.hg.1 | RPL31P20          |
| TC0300006721.hg.1 | werdeybo          |
| TC1800007644.hg.1 | steybor           |
| TC0400012247.hg.1 | RP11-597D13.8     |
| TC1200012119.hg.1 |                   |
| TC1300007792.hg.1 |                   |
| TC0700010046.hg.1 | FTSJ2             |
| TC0100010052.hg.1 | rarply            |
| TC0700011128.hg.1 | garker            |
| TC0700012832.hg.1 | RP5-842K16.1      |
| TC0200015324.hg.1 | smogerbo          |
| TC0100008521.hg.1 | snaplu            |
| TC0700011479.hg.1 | LOC541473         |
| TC0X00008140.hg.1 | snudu             |
| TC1100007923.hg.1 | RNU6-45P          |
| TC0700008431.hg.1 |                   |
| TC1000008714.hg.1 |                   |
| TC0700008490.hg.1 |                   |
| TC0200016344.hg.1 | MTERF4            |
| TC2100006569.hg.1 |                   |



|                   |                          |
|-------------------|--------------------------|
| TC1600010332.hg.1 |                          |
| TC1700008619.hg.1 |                          |
| TC0100011422.hg.1 | kyply                    |
| TC0X00007077.hg.1 |                          |
| TC1300008584.hg.1 |                          |
| TC1000011322.hg.1 | RNU6-529P                |
| TC0900008574.hg.1 | TRIM32                   |
| TC0300006895.hg.1 | kofybo                   |
| TC0900010795.hg.1 | tershee                  |
| TC0700011792.hg.1 | RNU6-10P                 |
| TC0300007905.hg.1 |                          |
| TC1000010271.hg.1 | AL121748.1               |
| TC1500010294.hg.1 | veeswa                   |
| TC0900007399.hg.1 |                          |
| TC1200010895.hg.1 | gokaby                   |
| TC0X00009278.hg.1 | RP11-298C3.2             |
| TC0700012181.hg.1 | swasmorbu                |
| TC0500007262.hg.1 | flerplerby               |
| TC1600007164.hg.1 | beyweybu                 |
| TC1600007182.hg.1 | forsny                   |
| TC1000009133.hg.1 | Y_RNA                    |
| TC1200011811.hg.1 | MTERF2                   |
| TC0200009065.hg.1 | DBI                      |
| TC0400011935.hg.1 | PPP1R14BP3               |
| TC0X00009063.hg.1 | plerder                  |
| TC1100006926.hg.1 | mimiro                   |
| TC0800007915.hg.1 | swusharby                |
| TC0900006988.hg.1 | CYP4F26P; RP11-255A11.21 |
| TC1700010499.hg.1 | lawer                    |
| TC0500007505.hg.1 |                          |
| TC1500010656.hg.1 | slaloby                  |
| TC0X00010528.hg.1 |                          |
| TC1600008825.hg.1 | geebuby                  |
| TC0600007241.hg.1 | LRRC16A                  |
| TC0200009344.hg.1 | CCDC74A                  |
| TC1900007432.hg.1 | seypey                   |
| TC1800007843.hg.1 | sihama; TUBB8P12         |
| TC0800010594.hg.1 |                          |
| TC0500010699.hg.1 |                          |
| TC0500011041.hg.1 | zyplaby                  |
| TC1700012437.hg.1 | SRSF1                    |
| TC0300008386.hg.1 | sersweyby                |
| TC0300013652.hg.1 |                          |

|                   |               |
|-------------------|---------------|
| TC0200007285.hg.1 | leykly        |
| TC0800007104.hg.1 | lushor        |
| TC1500009828.hg.1 | MIR4512       |
| TC0500007846.hg.1 | AC008581.1    |
| TC1700009623.hg.1 | PHF23         |
| TC2100007747.hg.1 |               |
| TC1600008364.hg.1 | cheyzabu      |
| TC1900007940.hg.1 | smychaw       |
| TC1700011473.hg.1 |               |
| TC0300011487.hg.1 | sheyrybu      |
| TC0400006627.hg.1 |               |
| TC2000009847.hg.1 | stapu         |
| TC1700008101.hg.1 | RP11-995C19.2 |
| TC1400007330.hg.1 | jasma         |
| TC1800007597.hg.1 | RNU6-39P      |
| TC0200009891.hg.1 | jordar        |
| TC0200016322.hg.1 | glapybo       |
| TC0500010481.hg.1 | fogey         |
| TC1100009296.hg.1 | rorkarby      |
| TC0X00010275.hg.1 |               |
| TC1300007539.hg.1 | nawferby      |
| TC1200009067.hg.1 | slergoyby     |
| TC0700010906.hg.1 | sworblar      |
| TC1000010351.hg.1 |               |
| TC0300013131.hg.1 | tirayo        |
| TC1900008408.hg.1 | tosee         |
| TC0900012081.hg.1 | gyskabu       |
| TC0Y00006886.hg.1 | derbar        |
| TC0300012657.hg.1 | shydobu       |
| TC1500007966.hg.1 | skerzoybu     |
| TC0100007625.hg.1 | kerkobo       |
| TC0700010717.hg.1 | MIR548N       |
| TC0600012633.hg.1 | glujee        |
| TC1300006454.hg.1 | LINC00328-2P  |
| TC1300009230.hg.1 | forshoybu     |
| TC1700006634.hg.1 |               |
| TC1800007420.hg.1 | tawry         |
| TC1200010947.hg.1 | lublabu       |
| TC0400010460.hg.1 | RNU6-32P      |
| TC1000011828.hg.1 |               |
| TC0500010843.hg.1 | joypluby      |
| TC0100009291.hg.1 | RP11-90H3.1   |
| TC1400010071.hg.1 | CLMN          |

|                                     |               |
|-------------------------------------|---------------|
| TC0400006434.hg.1                   | glorboybo     |
| TC1500006768.hg.1                   | RNU6-18P      |
| TSUnmapped00000649.hg.1             | AC254958.1    |
| TC1000008322.hg.1                   | slasho        |
| TC0300010995.hg.1                   | speeswerby    |
| TC1100011871.hg.1                   | plorsteeby    |
| TC1600009921.hg.1                   | barseybo      |
| TC0300007137.hg.1                   | keefawbo      |
| TC1000009898.hg.1                   | RNU6-1075P    |
| TC1600006830.hg.1                   | bosmey        |
| TC1200007182.hg.1                   | FAR2          |
| TC0600013402.hg.1                   |               |
| TC0100017844.hg.1                   | NID1          |
| TC0500007529.hg.1                   |               |
| TC0600009753.hg.1                   | STXBP5        |
| TC2200006541.hg.1                   | blerser       |
| TC1000011930.hg.1                   | fawshu        |
| TC0200008048.hg.1                   | rarkawbu      |
| TC0200015142.hg.1                   |               |
| TC0300012718.hg.1                   | PLOD2         |
| TC1100009104.hg.1                   | rimoro        |
| TC2000009077.hg.1                   | RP5-1100H13.3 |
| TC14_GL000009v2_random00006437.hg.1 |               |
| TC0700013188.hg.1                   | pleyslawbu    |
| TC0100011000.hg.1                   |               |
| TC0900009599.hg.1                   | RNU6-14P      |
| TC1600008241.hg.1                   |               |
| TC0800011586.hg.1                   | tenamu        |
| TC0800009751.hg.1                   |               |
| TC0100017363.hg.1                   | sparreybu     |
| TC0900008240.hg.1                   | AL390876.1    |
| TC0200012253.hg.1                   | RNU6-577P     |
| TC1700007240.hg.1                   | SCDP1         |
| TC1200007426.hg.1                   | sneybloybu    |
| TC0900010894.hg.1                   | plartawby     |
| TC1800007360.hg.1                   | RAB27B        |
| TC0800006564.hg.1                   |               |
| TC0700008554.hg.1                   | skawkar       |
| TC0100013153.hg.1                   | TMCO4         |
| TC1900007540.hg.1                   | LOC100132200  |
| TC1000011853.hg.1                   |               |
| TC0900011083.hg.1                   |               |

|                   |               |
|-------------------|---------------|
| TC1000010752.hg.1 | AC067742.1    |
| TC1700011837.hg.1 |               |
| TC0500007259.hg.1 | plawflar      |
| TC0600013190.hg.1 | MOXD1         |
| TC0400011547.hg.1 | kobleyby      |
| TC0300013968.hg.1 | CCDC51        |
| TC0600007292.hg.1 |               |
| TC0700011068.hg.1 | nekomu        |
| TC0100018232.hg.1 |               |
| TC0700007823.hg.1 | sterzeyby     |
| TC0300013904.hg.1 | NAALADL2      |
| TC1800008766.hg.1 | klarsee       |
| TC0100015210.hg.1 | AC000032.2    |
| TC1000007636.hg.1 | PRKG1         |
| TC0100010118.hg.1 | MIR92B        |
| TC0400010999.hg.1 | farswaby      |
| TC0100008645.hg.1 | skernubu      |
| TC1400008626.hg.1 | sarswer       |
| TC1200012239.hg.1 | SNORA9        |
| TC1300008948.hg.1 | geppy         |
| TC1200009529.hg.1 | CTD-2140B24.6 |
| TC0400011458.hg.1 | storstawbu    |
| TC0X00008496.hg.1 |               |
| TC0100017260.hg.1 | NSL1          |
| TC0500010373.hg.1 | wustuby       |
| TC0200016758.hg.1 | LINC01473     |
| TC1000012072.hg.1 | pashu         |
| TC0100012298.hg.1 |               |
| TC1700010333.hg.1 |               |
| TC0900010927.hg.1 |               |
| TC0100013487.hg.1 | tarbo         |
| TC0800012171.hg.1 |               |
| TC1100012259.hg.1 | swyjoby       |
| TC1200011147.hg.1 | kluchar       |
| TC1000009891.hg.1 | juplabu       |
| TC0100017370.hg.1 |               |
| TC0900007474.hg.1 | RP11-561O23.8 |
| TC1600011565.hg.1 | CFDP1         |
| TC0700012170.hg.1 |               |
| TC0300009961.hg.1 | RNU6-25P      |
| TC0900006529.hg.1 |               |
| TC1600009705.hg.1 | swobley       |
| TC1100011244.hg.1 |               |

|                   |              |
|-------------------|--------------|
| TC0X00010966.hg.1 | ATP11C       |
| TC1100011801.hg.1 | gleefey      |
| TC1500007250.hg.1 | pleyspee     |
| TC0700008822.hg.1 |              |
| TC1800006824.hg.1 | blyteybu     |
| TC0200011551.hg.1 | ADI1         |
| TC0200009331.hg.1 | POTEE        |
| TC0100018262.hg.1 | GSTM2        |
| TC0500007598.hg.1 | kerzeyby     |
| TC0300007321.hg.1 | NDUFB1P1     |
| TC2200007627.hg.1 |              |
| TC0900009994.hg.1 |              |
| TC0100015889.hg.1 | bleyler      |
| TC0800006558.hg.1 | karslobu     |
| TC1600007446.hg.1 | RP11-455F5.6 |
| TC1400008931.hg.1 | SEPT7P1      |
| TC0500011062.hg.1 | kleyplarby   |
| TC0700011736.hg.1 | yahuya       |
| TC1900009749.hg.1 | tysey        |
| TC1500009256.hg.1 | LOC645204    |
| TC0X00007319.hg.1 |              |
| TC0600012803.hg.1 | RNU6-653P    |
| TC1000009301.hg.1 |              |
| TC1600006939.hg.1 | klorspar     |
| TC0800006839.hg.1 | klerslobu    |
| TC0100015393.hg.1 | ATP1A1OS     |
| TC0600011662.hg.1 | snawspuby    |
| TC0100008742.hg.1 |              |
| TC0100013673.hg.1 | AL121988.1   |
| TC0200011553.hg.1 | sherlaw      |
| TC0900007436.hg.1 | mehumu       |
| TC1200008286.hg.1 | NOP56P3      |
| TC0200016533.hg.1 |              |
| TC0600009964.hg.1 | vostaby      |
| TC0200014350.hg.1 |              |
| TC0700008674.hg.1 |              |
| TC0700009586.hg.1 | flashuby     |
| TC0200007709.hg.1 |              |
| TC0800008607.hg.1 | bleedyby     |
| TC1800008083.hg.1 |              |
| TC1400007796.hg.1 | noryby       |
| TC1900010718.hg.1 | RNU6-195P    |
| TC0100010517.hg.1 | burobo       |

|                               |               |
|-------------------------------|---------------|
| TC1600007099.hg.1             | COQ7          |
| TC0Y00006900.hg.1             | dabee         |
| TC0900006956.hg.1             | BOLA3P4       |
| TC0900012262.hg.1             | RP11-498P14.5 |
| TC0100017564.hg.1             |               |
| TC1100011537.hg.1             | sneyglarbu    |
| TC1300008209.hg.1             |               |
| TC0200009965.hg.1             |               |
| TC0400010660.hg.1             |               |
| TC1700008061.hg.1             |               |
| TC0X00008392.hg.1             | UTP14A        |
| TC1100006951.hg.1             |               |
| TC0100013132.hg.1             | RNU6-1099P    |
| TC0300010190.hg.1             | snadarbo      |
| TC1200007210.hg.1             | DDX11         |
| TC0100015391.hg.1             | ATP1A1-AS1    |
| TC0200012737.hg.1             | speejeybo     |
| TC0700007604.hg.1             | gawker        |
| TC0800008355.hg.1             | feevawby      |
| TC1100012831.hg.1             | ZBTB44        |
| TC0700011164.hg.1             | forsnobu      |
| TC2000007229.hg.1             | juvoy         |
| TC0100011029.hg.1             | larkloy       |
| TC0600009206.hg.1             | MARCKS        |
| TC1500008859.hg.1             | RNU6-17P      |
| TC1000012280.hg.1             | sweypaby      |
| TC0100018570.hg.1             | HNRNPU-AS1    |
| TC0200009407.hg.1             | stafa         |
| TC0400010184.hg.1             |               |
| TC0600008266.hg.1             |               |
| TC0200014106.hg.1             |               |
| TC0300008771.hg.1             | bloborbu      |
| TC1100010032.hg.1             | blerkerby     |
| TC0500010556.hg.1             | swozoby       |
| TC1800006588.hg.1             |               |
| TC0200007087.hg.1             | blarjawbu     |
| TC0500008015.hg.1             | norsmeybu     |
| TC1200010334.hg.1             | RP11-278C7.4  |
| TC2000006837.hg.1             |               |
| TC1800008179.hg.1             |               |
| TC0200007616.hg.1             | peedybu       |
| TC1_KI270706v1_random00006435 |               |
| .hg.1                         | RP11-782C8.3  |

|                         |                              |
|-------------------------|------------------------------|
| TC0100011630.hg.1       | spawabo                      |
| TC1200009565.hg.1       | dablar                       |
| TC0500008116.hg.1       |                              |
| TC0100007465.hg.1       |                              |
| TC0900011893.hg.1       |                              |
| TC1300007209.hg.1       | huware                       |
| TC1100009452.hg.1       |                              |
| TC1300007335.hg.1       | DIAPH3-AS1                   |
| TC1700012222.hg.1       | LOC400590; TCONS_12_00010688 |
| TC2200008004.hg.1       | karfy                        |
| TC1000009804.hg.1       |                              |
| TC1600010537.hg.1       | RNU6-21P                     |
| TC0700009631.hg.1       |                              |
| TC0800009014.hg.1       | dyskorbu                     |
| TC0100015072.hg.1       |                              |
| TC0200008282.hg.1       | PTCD3andSNORD94              |
| TC0700013620.hg.1       | IMPDH1                       |
| TC1700007604.hg.1       | jysmar                       |
| TC0X00010031.hg.1       | Y_RNA                        |
| TC0800011718.hg.1       | zykor                        |
| TC1000012405.hg.1       | glama                        |
| TC0900007446.hg.1       | RP11-327122.3                |
| TC0100015897.hg.1       |                              |
| TC0700009875.hg.1       |                              |
| TC1000011036.hg.1       |                              |
| TC1700010476.hg.1       |                              |
| TC1100007430.hg.1       | GYLTL1B                      |
| TC0600011645.hg.1       | Metazoa_SRP                  |
| TC1100007575.hg.1       | AC110283.1                   |
| TC0200007366.hg.1       | natayo                       |
| TC1700010953.hg.1       | KPNB1                        |
| TC0700009744.hg.1       |                              |
| TC0300008163.hg.1       |                              |
| TC1800007932.hg.1       | meekey                       |
| TC0300009165.hg.1       | spadorbu                     |
| TC0X00011330.hg.1       | LINC00894                    |
| TC0400011814.hg.1       | posnerby                     |
| TC1400008395.hg.1       | EIF5                         |
| TC2200006442.hg.1       | LOC102723769                 |
| TC0500012031.hg.1       |                              |
| TC0100016644.hg.1       | RNU6-41P                     |
| TC0400010251.hg.1       | DHX15                        |
| TSUnmapped00000493.hg.1 | TRAPPC4                      |

|                         |                          |
|-------------------------|--------------------------|
| TC1200012257.hg.1       |                          |
| TC0300009548.hg.1       | blawkoybu                |
| TC0200013872.hg.1       | zyswarby                 |
| TC0900010767.hg.1       | sershee                  |
| TC0X00010355.hg.1       | TIMM8A                   |
| TC1900007273.hg.1       | jertarbu                 |
| TC2100008575.hg.1       |                          |
| TC0900011717.hg.1       | vytuby                   |
| TC0500011604.hg.1       |                          |
| TC0500011086.hg.1       |                          |
| TC1200008165.hg.1       | KCNMB4                   |
| TC0600009611.hg.1       | HEBP2                    |
| TC1200007875.hg.1       | flokaby                  |
| TC0800009015.hg.1       | RNU6-144P                |
| TC1600010465.hg.1       | RNU6-20P                 |
| TC1200008166.hg.1       | RP11-588H23.3            |
| TC0100018086.hg.1       |                          |
| TC0700012262.hg.1       | chukaw                   |
| TC1400009309.hg.1       | jypo                     |
| TC1100008057.hg.1       | jakawby                  |
| TC1300008854.hg.1       |                          |
| TC0100016348.hg.1       | skoykeebo                |
| TC0200010425.hg.1       |                          |
| TC1800007640.hg.1       |                          |
| TC1200007698.hg.1       |                          |
| TC0300013751.hg.1       | BDH1                     |
| TC1000009844.hg.1       | SEPHS1                   |
| TC1000011008.hg.1       | Y_RNA                    |
| TSUnmapped00000805.hg.1 | ULK4P3                   |
| TC0800010766.hg.1       | LACTB2                   |
| TC0300010683.hg.1       | pysporby                 |
| TC0100008027.hg.1       | norpobu                  |
| TC1200007184.hg.1       | loygoby                  |
| TC1200010409.hg.1       | fono                     |
| TC0100011486.hg.1       |                          |
| TC0X00010856.hg.1       | Y_RNA                    |
| TC1900008579.hg.1       | plawjoy; plerjoy; swawaw |
| TC0200010799.hg.1       |                          |
| TC0600012324.hg.1       |                          |
| TC2200007706.hg.1       | jarblo                   |
| TC1700010834.hg.1       | karey                    |
| TC0100012073.hg.1       | LDHAP2                   |
| TC1600011531.hg.1       | HERC2P8                  |



|                   |                   |
|-------------------|-------------------|
| TC0900006447.hg.1 | karlo             |
| TC0900010056.hg.1 | ANKRD18A; FAM95C  |
| TC0800008749.hg.1 |                   |
| TC1600007097.hg.1 | RNU6-1340P        |
| TC0200009093.hg.1 |                   |
| TC0300006681.hg.1 | wojobo            |
| TC1600006613.hg.1 | cheespee          |
| TC0300012135.hg.1 | shobawbu          |
| TC1300010019.hg.1 | TCONS_I2_00007482 |
| TC0500011467.hg.1 | flargey           |
| TC1600006749.hg.1 | Metazoa_SRP       |
| TC0100011503.hg.1 |                   |
| TC0700009253.hg.1 | NUP205            |
| TC0100016462.hg.1 | BANF1P4           |
| TC0600013476.hg.1 |                   |
| TC0300010485.hg.1 | AC104441.1        |
| TC0700009626.hg.1 |                   |
| TC0200012603.hg.1 | totumo            |
| TC2000008515.hg.1 | SNX5              |
| TC0700008813.hg.1 | AC003989.4        |
| TC0200010632.hg.1 |                   |
| TC1600007111.hg.1 | storserberbo      |
| TC1200009654.hg.1 |                   |
| TC0100015931.hg.1 | PMVK              |
| TC0200007927.hg.1 |                   |
| TC1100008537.hg.1 |                   |
| TC0200008242.hg.1 | AC093162.1        |
| TC0700012110.hg.1 | mokumu            |
| TC1200012115.hg.1 | stygoyby          |
| TC2100007187.hg.1 |                   |
| TC0500010847.hg.1 | nypluby           |
| TC2200007872.hg.1 | FABP5P11          |
| TC0100008554.hg.1 | USP1              |
| TC1900009658.hg.1 |                   |
| TC0200011383.hg.1 | ruyura            |
| TC0700009659.hg.1 |                   |
| TC1800006534.hg.1 | RP11-138C24.2     |
| TC0100014028.hg.1 | jeyrobo           |
| TC0400010642.hg.1 |                   |
| TC1900011395.hg.1 |                   |
| TC1000008353.hg.1 | RP11-57C13.5      |
| TC1700011172.hg.1 | RP11-257O5.2      |
| TC0600009491.hg.1 | SNORA33           |

|                              |                |
|------------------------------|----------------|
| TC1400008768.hg.1            | noymawby       |
| TC1100008256.hg.1            | RNU6-1175P     |
| TC0700008364.hg.1            |                |
| TC1700007531.hg.1            | snarrey        |
| TC2200008351.hg.1            | tyvaw          |
| TC0300009830.hg.1            | dorneebu       |
| TC1700007214.hg.1            | rorroy         |
| TC0200010303.hg.1            |                |
| TC1800008176.hg.1            |                |
| TC0600007356.hg.1            |                |
| TCUn_GL000213v100006435.hg.1 | U6             |
| TC0900011394.hg.1            | C5             |
| TC2200006889.hg.1            | boror          |
| TC1100010312.hg.1            |                |
| TC0600006964.hg.1            | flaroyby       |
| TC1900006871.hg.1            | terkla         |
| TC0400009725.hg.1            |                |
| TC0200009872.hg.1            | zeekla         |
| TC0X00010673.hg.1            |                |
| TC0100018299.hg.1            | SLC27A3        |
| TC1700010619.hg.1            | Y_RNA          |
| TC1200011164.hg.1            | chaflubu       |
| TC0900009310.hg.1            | shytarby       |
| TC0100008672.hg.1            | AL157407.1     |
| TC1200006513.hg.1            | swerblarbu     |
| TC2200007773.hg.1            | Metazoa_SRP    |
| TC0X00010839.hg.1            | RNU6-98P       |
| TC0800011988.hg.1            | lorskorbu      |
| TC0300009205.hg.1            | mofarbu        |
| TC0800010015.hg.1            |                |
| TC1000008759.hg.1            | smafoy         |
| TC1600007082.hg.1            | fleesnu        |
| TC0200010802.hg.1            | skarklu        |
| TC0800007544.hg.1            | KIAA0146       |
| TC1800006975.hg.1            |                |
| TC2100008472.hg.1            | RPL18AP2       |
| TC0300008324.hg.1            | PHLDB2; PLCXD2 |
| TC1900010071.hg.1            | snogley        |
| TC1200009591.hg.1            | rarblyby       |
| TC1200008012.hg.1            | dafley         |
| TSUnmapped00000950.hg.1      |                |
| TC0400008142.hg.1            | gabubo         |
| TC1000011653.hg.1            | berperby       |

|                   |                      |
|-------------------|----------------------|
| TC0300012006.hg.1 | CD200R1L             |
| TC1800007036.hg.1 |                      |
| TC0200012649.hg.1 | vodoy                |
| TC0100006782.hg.1 | pawboy               |
| TC1700007411.hg.1 |                      |
| TC0200010680.hg.1 |                      |
| TC1100008327.hg.1 | chaferby             |
| TC1600009094.hg.1 | SNHG19               |
| TC0300008200.hg.1 |                      |
| TC1700011503.hg.1 | kutama               |
| TC0200015058.hg.1 | DNAJC19P5            |
| TC1100012205.hg.1 |                      |
| TC1800008514.hg.1 | MIR924               |
| TC1900007487.hg.1 | dytawbu              |
| TC0800008608.hg.1 | skarverby; spardeyby |
| TC1700012423.hg.1 | LRRC37A4P            |
| TC1700008554.hg.1 | kormoy               |
| TC1900007625.hg.1 | swutawbu             |
| TC1100007745.hg.1 | seechor              |
| TC2100006504.hg.1 |                      |
| TC2200006464.hg.1 | muyora               |
| TC0700010739.hg.1 | RP11-609L3.1         |
| TC0Y00007091.hg.1 |                      |
| TC0900010964.hg.1 |                      |
| TC0100010858.hg.1 | DHX9                 |
| TC1900010629.hg.1 |                      |
| TC1500006970.hg.1 |                      |
| TC0100009198.hg.1 | RP4-714D9.5          |
| TC1900006732.hg.1 | bleeta               |
| TC1500006743.hg.1 | nakima               |
| TC0600010384.hg.1 | RP11-532F6.2         |
| TC0X00007309.hg.1 | snoygar              |
| TC0900008259.hg.1 | meyshee              |
| TC0900011745.hg.1 |                      |
| TC0700008524.hg.1 | CNPY4                |
| TC0400008931.hg.1 | kuseme               |
| TC1900011320.hg.1 | slawwey              |
| TC0100008303.hg.1 |                      |
| TC1100011390.hg.1 | kukerby              |
| TC0500011017.hg.1 | blastawbu            |
| TC0500011040.hg.1 | kavubo               |
| TC1000010863.hg.1 | RNU6-571P            |
| TC0300008659.hg.1 | teramo               |

|                   |                                       |
|-------------------|---------------------------------------|
| TC0700009279.hg.1 | foyperby                              |
| TC1200007575.hg.1 |                                       |
| TC0100017673.hg.1 |                                       |
| TC1500006884.hg.1 |                                       |
| TC0300011631.hg.1 | rorswerby                             |
| TC0800007612.hg.1 |                                       |
| TC1500008881.hg.1 | bleydeeb                              |
| TC0X00010588.hg.1 |                                       |
| TC1200006827.hg.1 |                                       |
| TC1900008305.hg.1 | RNU6-611P                             |
| TC0200010678.hg.1 |                                       |
| TC0800011276.hg.1 | swarshor                              |
| TC0100014999.hg.1 |                                       |
| TC1200012241.hg.1 | doyfu                                 |
| TC0700012268.hg.1 | deebler                               |
| TC0500006659.hg.1 |                                       |
| TC0800007916.hg.1 | RNY3P14                               |
| TC1700009800.hg.1 | RP11-597M12.1                         |
| TC0300013483.hg.1 | poynarbu                              |
| TC0300008012.hg.1 | HTR1F                                 |
| TC1600008765.hg.1 | klawro                                |
| TC0900009363.hg.1 | chushaw                               |
| TC0800011051.hg.1 | skuveybu                              |
| TC0X00007330.hg.1 | jaber                                 |
| TC1600009300.hg.1 | CTD-2535I10.1                         |
| TC0200012915.hg.1 |                                       |
| TC1500006688.hg.1 | snoZ278                               |
| TC0800007632.hg.1 |                                       |
| TC0700007843.hg.1 | spyjoy                                |
| TC1400007117.hg.1 | RP11-406H23.5                         |
| TC0200010374.hg.1 | MARS2                                 |
| TC0700010812.hg.1 | kuchoyby                              |
| TC1000007480.hg.1 |                                       |
| TC0300008394.hg.1 | ZBTB20-AS2; RP11-138N21.1; smawsweyby |
| TC1100009859.hg.1 | NUP98                                 |
| TC1400007417.hg.1 | CTD-2302E22.2                         |
| TC0X00007969.hg.1 | TCP11X2                               |
| TC1300006848.hg.1 | RFC3                                  |
| TC1300007188.hg.1 | feypy                                 |
| TC2100007624.hg.1 |                                       |
| TC1100012427.hg.1 | vyna                                  |
| TC0700012146.hg.1 | CTB-152G17.6                          |
| TC1200012134.hg.1 |                                       |

|                   |               |
|-------------------|---------------|
| TC1100010887.hg.1 | SSRP1         |
| TC0300012124.hg.1 | CSRP2P        |
| TC0100017617.hg.1 | HIST3H2A      |
| TC1900007992.hg.1 | reture        |
| TC0100014060.hg.1 | ATPAF1        |
| TC0700009685.hg.1 |               |
| TC1600009918.hg.1 | sharsmer      |
| TC0200015138.hg.1 | Y_RNA         |
| TC0300012439.hg.1 |               |
| TC2200007206.hg.1 | MCM5          |
| TC1300006676.hg.1 | RASL11A       |
| TC1600007086.hg.1 | kleebly       |
| TC0500010776.hg.1 |               |
| TC0600009773.hg.1 |               |
| TC1300006479.hg.1 |               |
| TC0900006437.hg.1 | LOC642313     |
| TC1700012425.hg.1 | RP11-798G7.7  |
| TC1800007130.hg.1 | nybley        |
| TC0600008760.hg.1 | PM20D2        |
| TC0400006691.hg.1 |               |
| TC1400009506.hg.1 |               |
| TC1400007914.hg.1 | ronaru        |
| TC0200009815.hg.1 | RNA5SP108     |
| TC1600008898.hg.1 | VPS9D1-AS1    |
| TC1400006938.hg.1 |               |
| TC0400012829.hg.1 | ARHGEF38      |
| TC0200010255.hg.1 | PMS1          |
| TC0800009837.hg.1 | soyweyby      |
| TC0400012874.hg.1 | CYP4V2        |
| TC1700006912.hg.1 |               |
| TC0800009524.hg.1 | RP11-62H7.3   |
| TC1900011490.hg.1 | CTD-2537I9.12 |
| TC2200008173.hg.1 |               |
| TC1200011978.hg.1 |               |
| TC0800008478.hg.1 | FZD6          |
| TC0700012270.hg.1 | wusmoybu      |
| TC0900011539.hg.1 | roler         |
| TC1200009490.hg.1 | vunee         |
| TC0600008736.hg.1 | swawsloyby    |
| TC0100008520.hg.1 | luzawbo       |
| TC0200016364.hg.1 |               |
| TC0300009338.hg.1 | MIR15B        |
| TC2000009071.hg.1 | SNORA71B      |

|                                        |                       |
|----------------------------------------|-----------------------|
| TC1900010580.hg.1                      | ZNF573                |
| TC0300013456.hg.1                      | zernybu               |
| TC1300008738.hg.1                      |                       |
| TC0800010198.hg.1                      |                       |
| TC0800009767.hg.1                      | AC100800.1            |
| TC0600010394.hg.1                      |                       |
| TC0100013690.hg.1                      |                       |
| TC1000011187.hg.1                      | jeyslaw               |
| TC1100008390.hg.1                      | HMGN2P38              |
| TC0700010925.hg.1                      | DDX56                 |
| TC1800007139.hg.1                      |                       |
| TC0100009654.hg.1                      | glozerbo              |
| TC0700013218.hg.1                      | AC005534.8            |
| TC0500007284.hg.1                      | LOC153684; AC025171.1 |
| TC1700009103.hg.1                      | florchor              |
| TC0500008125.hg.1                      | RHOBTB3               |
| TC0700013229.hg.1                      |                       |
| TC0200015162.hg.1                      | FSIP2-AS1; AC008174.3 |
| TC0600007532.hg.1                      |                       |
| TC2100007812.hg.1                      | MACSL1                |
| TC1600006574.hg.1                      | NDUFB10               |
| TC4_GL000008v2_random0000644<br>5.hg.1 |                       |
| TC0200006527.hg.1                      |                       |
| TC1700011948.hg.1                      | forgly                |
| TC0300008840.hg.1                      | smyboybu              |
| TC1100010221.hg.1                      |                       |
| TC2200007803.hg.1                      | chublaw               |
| TC0600011170.hg.1                      |                       |
| TC1200006518.hg.1                      |                       |
| TC1700008943.hg.1                      | RNU6-24P              |
| TC1700010980.hg.1                      | RNU6-1201P            |
| TC1900009370.hg.1                      | AC027319.1            |
| TC1200011792.hg.1                      | RP11-651L5.2; plosly  |
| TC0700006977.hg.1                      | NFE2L3                |
| TC1700006863.hg.1                      | AC000003.1            |
| TC0400012087.hg.1                      | RP11-360A10.1         |
| TC1200012528.hg.1                      | spujeeby              |
| TC0400012458.hg.1                      | HPGD                  |
| TC0500010774.hg.1                      | MIR5687               |
| TC1200011245.hg.1                      | PTPRB                 |
| TC0700010443.hg.1                      | STEAP1B               |
| TC0700008292.hg.1                      | STEAP1                |

|                   |                        |
|-------------------|------------------------|
| TC0700008293.hg.1 | STEAP2                 |
| TC0200006630.hg.1 | koystawby              |
| TC2000007868.hg.1 |                        |
| TC0100011399.hg.1 |                        |
| TC1900009688.hg.1 |                        |
| TC2000009604.hg.1 | PMEPA1                 |
| TC0600007812.hg.1 | SNORA40                |
| TC1000008646.hg.1 | OLMALINC               |
| TC0100017116.hg.1 | C1orf116               |
| TC0700007103.hg.1 | slawky                 |
| TC1800007850.hg.1 | COLEC12                |
| TC0900009905.hg.1 | CNTFR                  |
| TC0200016625.hg.1 |                        |
| TC0700008745.hg.1 | PRKAR2B                |
| TC0200009436.hg.1 | SNORA40                |
| TC1100012367.hg.1 | narna                  |
| TC1200009142.hg.1 | sheyjaby               |
| TC1100009106.hg.1 | weyjawby               |
| TC0X00009337.hg.1 |                        |
| TC1900011225.hg.1 | KLKP1                  |
| TC1200008667.hg.1 | HSP90B1                |
| TC1700010271.hg.1 | RP11-354P11.8; glerror |
| TC1200008009.hg.1 |                        |
| TC0200013023.hg.1 | keyjoybo               |
| TC0400012473.hg.1 | GPM6A                  |
| TC0600012274.hg.1 |                        |
| TC0700007132.hg.1 | FKBP9                  |
| TC1100007218.hg.1 | swortubo               |
| TC1200008167.hg.1 | RP11-785D18.3          |
| TC1100009108.hg.1 | galerby                |
| TC0500012588.hg.1 | HAVCR1                 |
| TC0600011587.hg.1 | doybloy                |
| TC0600011635.hg.1 | FKBP5                  |
| TC0300013072.hg.1 | shorjeebu              |
| TC0200013024.hg.1 | zawklar                |
| TC0900012136.hg.1 |                        |
| TC0200013631.hg.1 | flajybu                |
| TC1900010310.hg.1 |                        |
| TC0900007360.hg.1 |                        |
| TC0200013633.hg.1 | kleydey                |
| TC1200011313.hg.1 | NAP1L1                 |
| TC0300008528.hg.1 | bybeebeu               |
| TC0100009148.hg.1 | swerplo                |

|                   |                                          |
|-------------------|------------------------------------------|
| TC1000012497.hg.1 | BORCS7-ASMT                              |
| TC1600007882.hg.1 | LOC102723373; RP11-44F14.2; RP11-44F14.8 |
| TC0400009503.hg.1 | PRIMPOL                                  |
| TC1200010531.hg.1 | SLC38A4                                  |
| TC1600011574.hg.1 | GIN52                                    |
| TC1400008556.hg.1 | CTD-2311B13.7; LINC01297                 |
| TC0200009659.hg.1 | FABP5P10                                 |
| TC0100010515.hg.1 | sloymabu                                 |
| TC1900008608.hg.1 | KLK2                                     |
| TC0600011637.hg.1 | doykleebu                                |
| TC0200013843.hg.1 | flokubo                                  |
| TC0600007813.hg.1 |                                          |
| TC0X00007053.hg.1 | MAOA                                     |
| TC0400008483.hg.1 | UGT8                                     |
| TC0300008561.hg.1 | PARP14                                   |
| TC1800006440.hg.1 | RP11-720L2.4                             |
| TC2100006574.hg.1 |                                          |
| TC0900007800.hg.1 | CDC20P1                                  |
| TC0300010046.hg.1 | MFI2-AS1                                 |
| TC0X00008790.hg.1 | DUSP9                                    |
| TC2000007871.hg.1 | suraw                                    |
| TC1100008948.hg.1 | GRIA4                                    |
| TC0700006625.hg.1 |                                          |
| TC0400011448.hg.1 | tawsweebu                                |
| TC1900007495.hg.1 | AC010329.1                               |
| TC1000011557.hg.1 | LOC100270710                             |
| TC0600010572.hg.1 | TUBB2B                                   |
| TC0700011734.hg.1 |                                          |
| TC0600009755.hg.1 | skyvoby                                  |
| TC0400006645.hg.1 | STX18-AS1                                |
| TC0900007359.hg.1 | LINC01410                                |
| TC0X00007936.hg.1 | CENPI                                    |
| TC2200007841.hg.1 | CU463998.3                               |
| TC0900009867.hg.1 |                                          |
| TC0500012817.hg.1 | sperskeeby                               |
| TC2100007464.hg.1 |                                          |
| TC0900012127.hg.1 | RP11-146D12.2                            |
| TC0700008361.hg.1 | peekar                                   |
| TC1100007510.hg.1 | keenby                                   |
| TC0100015935.hg.1 |                                          |
| TC0900009569.hg.1 | NFIB                                     |
| TC1100008149.hg.1 | wostuby                                  |
| TC1900011223.hg.1 | KLK1                                     |



|                   |               |
|-------------------|---------------|
| TC0500010865.hg.1 | DEPDC1B       |
| TC1000010405.hg.1 | LOC441666     |
| TC0400008252.hg.1 | spustawbu     |
| TC1200011312.hg.1 | lerchar       |
| TC0600011130.hg.1 | HIST1H4C      |
| TC0700007776.hg.1 | BNIP3P42      |
| TC0400009375.hg.1 | RP11-598O12.1 |
| TC0700011151.hg.1 | FKBP9P1       |
| TC0200016445.hg.1 | MSH6          |
| TC0200008200.hg.1 | LOC1720       |
| TC1200009086.hg.1 | RN7SL508P     |
| TC0700013363.hg.1 | GBAS          |
| TC1300007193.hg.1 |               |
| TC0800011071.hg.1 | TMEM64        |
| TC0900011038.hg.1 | GRIN3A        |
| TC1200010712.hg.1 | RP11-923I11.3 |
| TC2200008036.hg.1 | USP41         |
| TC1700006622.hg.1 | kergler       |
| TC0900006438.hg.1 | DOCK8         |
| TC0X00007495.hg.1 | boydy         |
| TC0400011449.hg.1 | nago          |
| TC0700008969.hg.1 | teesnabu      |
| TC0100011188.hg.1 | snokorbo      |
| TC0300012671.hg.1 | snawdobu      |
| TC1200010805.hg.1 | gloyno        |
| TC1200008622.hg.1 | notch         |
| TC0100018432.hg.1 | SFPQ          |
| TC0100009778.hg.1 | snorarbu      |
| TC0400008685.hg.1 | vystorbu      |
| TC1600006657.hg.1 |               |
| TC0900007242.hg.1 | blymar        |
| TC0900012134.hg.1 | CR848007.2    |
| TC1100012285.hg.1 | COLCA1        |
| TC0200015266.hg.1 | TMEFF2        |
| TC0200012559.hg.1 | NRXN1         |
| TC0400008370.hg.1 |               |
| TC0800010045.hg.1 | TEX15         |
| TC1800008750.hg.1 | TCF4          |
| TC0600007207.hg.1 | GMNN          |
| TC0500010528.hg.1 | AC074129.1    |
| TC0X00007318.hg.1 |               |
| TC0200013431.hg.1 | kerplar       |
| TC1200012159.hg.1 | MSI1          |

|                   |               |
|-------------------|---------------|
| TC0200014244.hg.1 | FAR2P1        |
| TC0600010123.hg.1 | stoyflawby    |
| TC0600009436.hg.1 | L3MBTL3       |
| TC1200007041.hg.1 | RP11-424C20.2 |
| TC0100008350.hg.1 | smuzarbo      |
| TC0900007634.hg.1 |               |
| TC1900007497.hg.1 | flarchoy      |
| TC0400007474.hg.1 | AC118282.3    |
| TC0400006908.hg.1 |               |
| TC0600007282.hg.1 | HIST1H2BF     |
| TC0600009143.hg.1 | SLC16A10      |
| TC0400009746.hg.1 | SLBP          |
| TC0700009914.hg.1 | foyzeyby      |
| TC2200006890.hg.1 | joyfer        |
| TC0600011636.hg.1 | kypabu        |
| TC0200008859.hg.1 | jawgorbu      |
| TC0400011445.hg.1 | MIR8066       |
| TC0400012396.hg.1 | AADAT         |
| TC0100014206.hg.1 | chaplo        |
| TC0700006916.hg.1 | AC021876.4    |
| TC1600007558.hg.1 |               |
| TC0400007480.hg.1 | MTCO3P39      |
| TC1500007064.hg.1 | shorfarby     |
| TC0100013146.hg.1 | zeyplu        |
| TC0100009149.hg.1 | PTBP2         |
| TC1300006628.hg.1 | SLC25A15P3    |
| TC0900007361.hg.1 |               |
| TC0700008131.hg.1 | poysmorbu     |
| TC2100008543.hg.1 | ANKRD20A11P   |
| TC0300006848.hg.1 | LOC101927854  |
| TC1400006482.hg.1 | zeecharbu     |
| TC1100010254.hg.1 | SAAL1         |
| TC0400009614.hg.1 |               |
| TC0900010006.hg.1 | veesarby      |
| TC0100013852.hg.1 | AL391730.2    |
| TC0X00007222.hg.1 | PLP2          |
| TC0300012968.hg.1 |               |
| TC1600008212.hg.1 | glusmer       |
| TC0100015569.hg.1 | CH17-125A10.2 |
| TC0700008811.hg.1 | voysmoybu     |
| TC0200015548.hg.1 | METTL21A      |
| TC0400010477.hg.1 | skaswyby      |
| TC2200007635.hg.1 | watara        |

|                         |                 |
|-------------------------|-----------------|
| TC0700008262.hg.1       |                 |
| TC1600009522.hg.1       |                 |
| TC0200008634.hg.1       | typobo          |
| TC0500007729.hg.1       | MCCC2           |
| TC0100010887.hg.1       | C1orf21         |
| TC2200006997.hg.1       | jyfo            |
| TC0200015650.hg.1       | FN1             |
| TC1200011702.hg.1       |                 |
| TC0400011532.hg.1       | AC093680.1      |
| TC1300008373.hg.1       |                 |
| TC0100017494.hg.1       | yokoyo          |
| TC2100007525.hg.1       |                 |
| TC1200011723.hg.1       | sygleeby        |
| TC1100009448.hg.1       |                 |
| TC0300011013.hg.1       |                 |
| TC1200009087.hg.1       | monumi          |
| TC0100017232.hg.1       |                 |
| TC0100016571.hg.1       | RP11-52118.1    |
| TC0200015240.hg.1       |                 |
| TC0900006917.hg.1       | RBMXP2          |
| TC2000006553.hg.1       | AL109805.1      |
| TC0400010668.hg.1       | RP11-1281K21.10 |
| TC0700013389.hg.1       | STAG3L1         |
| TC0600008127.hg.1       | SLC29A1         |
| TC1600007451.hg.1       | RP11-347C12.9   |
| TC1100012524.hg.1       |                 |
| TC1100007371.hg.1       | snoymee         |
| TC1200012451.hg.1       | STX2            |
| TC1300008942.hg.1       | swowarby        |
| TC1000008961.hg.1       | NHLRC2          |
| TC0100012469.hg.1       | MXRA8           |
| TC0700012479.hg.1       | POT1            |
| TC0100015742.hg.1       | SNORA40         |
| TC0800007536.hg.1       | geyfoyby        |
| TC1800006442.hg.1       |                 |
| TC0300007692.hg.1       |                 |
| TC1300008207.hg.1       | USP24P1         |
| TC1500006731.hg.1       | RP11-932O9.10   |
| TSUnmapped00000694.hg.1 | RP11-932O9.10   |
| TC2200007207.hg.1       |                 |
| TC0700008665.hg.1       |                 |
| TC0400008295.hg.1       | peego           |
| TC0500011924.hg.1       | ALDH7A1         |

|                         |                                             |
|-------------------------|---------------------------------------------|
| TC2000007299.hg.1       | florroybu                                   |
| TC1400009351.hg.1       | SIX1                                        |
| TC0400008263.hg.1       |                                             |
| TC0600014111.hg.1       | SYNGAP1; MIR5004                            |
| TC1700012337.hg.1       | P2RX5                                       |
| TC0400007490.hg.1       | SNX18P25                                    |
| TC0400012454.hg.1       | swuflor                                     |
| TC0100013960.hg.1       | RP11-570P14.1                               |
| TC0400011452.hg.1       | nugo                                        |
| TC0600012652.hg.1       | FAXC                                        |
| TC0400007592.hg.1       | PAICS                                       |
| TC0200012442.hg.1       | AC067957.1                                  |
| TC0100016625.hg.1       | GLUL                                        |
| TC0100009142.hg.1       | PTBP2                                       |
| TC1900011221.hg.1       | C19orf48; SNORD88B; SNORD88C                |
| TC0200015624.hg.1       | zoyklu                                      |
| TC0500010496.hg.1       | stersleybu                                  |
| TC1600010057.hg.1       |                                             |
| TC1800008232.hg.1       | josaw                                       |
| TC1400008724.hg.1       | starcharbu                                  |
| TC0200015431.hg.1       | TMEM237                                     |
| TC1600007732.hg.1       |                                             |
| TC0X00006604.hg.1       |                                             |
| TC0100013478.hg.1       |                                             |
| TC0200012566.hg.1       | kloyklee                                    |
| TC0500006498.hg.1       |                                             |
| TC2000006749.hg.1       |                                             |
| TC1100009105.hg.1       | nerna                                       |
|                         | NOP56; SNORD57; SNORD56; SNORA51; SNORD110; |
| TC2000006518.hg.1       | SNORD86; MIR1292                            |
| TC0200014834.hg.1       | STK39                                       |
| TC2000008192.hg.1       |                                             |
| TC0700007860.hg.1       | blozorby                                    |
| TC0800010748.hg.1       | RP11-152C15.1                               |
| TC1200008882.hg.1       | RP11-686G8.1                                |
| TC0400011442.hg.1       | boyswoby                                    |
| TSUnmapped00000349.hg.1 | FBL                                         |
| TC1800007570.hg.1       | CDH7                                        |
| TC0600008209.hg.1       | CENPQ                                       |
| TC0100007479.hg.1       | vorybu                                      |
| TC0900009592.hg.1       | PSIP1                                       |
| TC1700008479.hg.1       | korwey                                      |
| TC0700012760.hg.1       | ZC3HAV1L                                    |

|                                    |                              |
|------------------------------------|------------------------------|
| TC0100009870.hg.1                  | HIST2H4B; HIST2H4A           |
| TC0200007815.hg.1                  | AC007365.2                   |
| TC1600010641.hg.1                  | CTD-2012K14.3; CTD-2012K14.4 |
| TC1400008083.hg.1                  |                              |
| TC1700008103.hg.1                  |                              |
| TC0400011202.hg.1                  | COQ2                         |
| TC1500008981.hg.1                  |                              |
| TC1600009945.hg.1                  | CTD-2574D22.3                |
| TC1700007395.hg.1                  | jyslar                       |
| TC0200008221.hg.1                  | plorstuby                    |
| TC0100011665.hg.1                  | 1-Mar                        |
| TC0100016936.hg.1                  |                              |
| TC0200015669.hg.1                  |                              |
| TC1100009450.hg.1                  | DCPS                         |
| TC0100017344.hg.1                  | luber                        |
| TC0500008016.hg.1                  | hohome                       |
| TC0500011315.hg.1                  | RPS23P5                      |
| TC4_GL000008v2_random00006440.hg.1 | sworzerbo                    |
| TC0800010265.hg.1                  | glerkor                      |
| TC0800006965.hg.1                  | paweyby                      |
| TC1300006483.hg.1                  |                              |
| TC0X00008059.hg.1                  |                              |
| TC0200011707.hg.1                  |                              |
| TC2200007318.hg.1                  | H1F0                         |
| TC1600010771.hg.1                  | spusnee                      |
| TC2100008277.hg.1                  | nerbaw                       |
| TC1800009029.hg.1                  | CYB5A                        |
| TC1500007170.hg.1                  | RP11-485O10.2; glygloy       |
| TC1600009762.hg.1                  | gosnu                        |
| TC1700012159.hg.1                  | forwor                       |
| TC1900010509.hg.1                  | reechaw                      |
| TC0X00008246.hg.1                  | SLC25A43                     |
| TC0100010732.hg.1                  | RP11-568K15.2                |
| TC0600006870.hg.1                  | SNRNP48                      |
| TC0600007947.hg.1                  | ANKRD18EP                    |
| TC0400006445.hg.1                  | AC079140.1                   |
| TC1300007859.hg.1                  |                              |
| TC1900006611.hg.1                  | AC005944.2                   |
| TC0700007871.hg.1                  | wergoy                       |
| TC0900008092.hg.1                  | loysawby                     |
| TC0200009442.hg.1                  | faderbu                      |
| TC0100011666.hg.1                  | buzubo                       |

|                         |               |
|-------------------------|---------------|
| TC1500007661.hg.1       | slarzo        |
| TC2200008668.hg.1       |               |
| TC0X00006623.hg.1       | PRPS2         |
| TC0900012034.hg.1       |               |
| TC1100008193.hg.1       | teymey        |
| TC1200012264.hg.1       | moswee        |
| TC0300010398.hg.1       |               |
| TC1200008518.hg.1       | danee         |
| TC1100012733.hg.1       |               |
| TC0200008536.hg.1       | ANKRD36       |
| TC1200007888.hg.1       | sareri        |
| TC0700008584.hg.1       | AP1S1         |
| TC1200010551.hg.1       | RP1-197B17.5  |
| TC1700011820.hg.1       | SRSF2; MIR636 |
| TC0300012128.hg.1       |               |
| TC1200006505.hg.1       | rucho         |
| TC1900009619.hg.1       | CTD-2369P2.4  |
| TC1900010221.hg.1       | ZNF681        |
| TC1900006512.hg.1       |               |
| TC1500008033.hg.1       |               |
| TC0100009324.hg.1       | FAM102B       |
| TC1200008792.hg.1       | UNG           |
| TC0200007023.hg.1       | swawgloy      |
| TC0200010412.hg.1       | stagabu       |
| TC0900008263.hg.1       |               |
| TC1700010859.hg.1       | DCAKD         |
| TC2200008227.hg.1       | sarfaw        |
| TC1000010567.hg.1       | charsho       |
| TC0100013748.hg.1       | GNL2          |
| TC1600008255.hg.1       |               |
| TC1900009094.hg.1       | AC009005.2    |
| TC1700010951.hg.1       | snuslaw       |
| TC1700010136.hg.1       |               |
| TC0700012693.hg.1       |               |
| TC1100010034.hg.1       |               |
| TC0400010691.hg.1       |               |
| TC1900010205.hg.1       |               |
| TC0100017852.hg.1       | swoyrarbo     |
| TC0700007168.hg.1       |               |
| TSUnmapped00000926.hg.1 |               |
| TC0800009573.hg.1       |               |
| TC0300012406.hg.1       | sperborbu     |
| TC1400010317.hg.1       | CKB           |

|                                     |                                 |
|-------------------------------------|---------------------------------|
| TC0200010734.hg.1                   | PKI55; RP11-566E18.3            |
| TC0300006584.hg.1                   |                                 |
| TC0200008534.hg.1                   | ANKRD36                         |
| TC0400010422.hg.1                   | GAFA3                           |
| TC0100007678.hg.1                   | HDAC1                           |
| TC0X00009619.hg.1                   | RP11-1148L6.5                   |
| TC1700008065.hg.1                   |                                 |
| TC0900010030.hg.1                   |                                 |
| TC0800010699.hg.1                   |                                 |
| TC0700006781.hg.1                   | BZW2                            |
| TC0100013482.hg.1                   | SNORD99                         |
| TC0300010397.hg.1                   |                                 |
| TC1200010271.hg.1                   | DDX11-AS1                       |
| TC0400006437.hg.1                   | ZNF718                          |
| TC0100016655.hg.1                   | shawbu                          |
| TC0500013271.hg.1                   | LOC728554; THOC3                |
| TC14_GL000009v2_random00006434.hg.1 |                                 |
| TC0800008388.hg.1                   | shervyby                        |
| TC0800008185.hg.1                   | swuly                           |
| TC2100006571.hg.1                   | flabor                          |
| TC0300011734.hg.1                   | weespyby                        |
| TC1600009946.hg.1                   | CTD-2574D22.4                   |
| TC1500009161.hg.1                   |                                 |
| TC1400009636.hg.1                   |                                 |
| TC0500010894.hg.1                   | DIMT1                           |
| TC1800007865.hg.1                   | jawwu                           |
| TC1200010362.hg.1                   |                                 |
| TSUnmapped00000756.hg.1             | ULK4P2                          |
| TC1000008623.hg.1                   | toypeeby                        |
| TC0700008063.hg.1                   | SPDYE5                          |
| TC0700013189.hg.1                   | marzerby                        |
| TC0400012375.hg.1                   | CBR4                            |
| TC0800007012.hg.1                   | LOC389641; RP11-1149O23.3       |
| TC1600008506.hg.1                   | RP11-358L22.3                   |
| TC1200011191.hg.1                   | SNORA70G                        |
| TC1700009502.hg.1                   |                                 |
| TC0700008542.hg.1                   | MEPCE                           |
| TC0100007559.hg.1                   | RCC1; SNORA73A; SNHG3; SNORA73B |
| TC0900010462.hg.1                   | RFK                             |
| TC0100015769.hg.1                   | speykubo                        |
| TC1700010473.hg.1                   |                                 |
| TC1200011720.hg.1                   | NUP37                           |

|                   |                |
|-------------------|----------------|
| TC1700012340.hg.1 | NUP88          |
| TC0300010991.hg.1 | bawfeybo       |
| TC0600011132.hg.1 | U91328.1       |
| TC0300006570.hg.1 | RP11-1020A11.2 |
| TC1600011293.hg.1 |                |
| TC1100011751.hg.1 | NARS2          |
| TC0100014662.hg.1 | smarplo        |
| TC1800007896.hg.1 | RP11-715F3.2   |
| TC1900010047.hg.1 | NR2C2AP        |
| TC1200010798.hg.1 | AAAS           |
| TC0800011472.hg.1 | NUDCD1         |
| TC0600007377.hg.1 | HIST1H2BM      |
| TC1400006697.hg.1 | DHRS2          |
| TC0100006805.hg.1 | RBP7           |
| TC1500007972.hg.1 | CRABP1         |
| TC0600011226.hg.1 | snysneyby      |
| TC0100014191.hg.1 | RAB3B          |
| TC0600009310.hg.1 | GJA1           |
| TC1200011097.hg.1 | RP11-629N8.5   |
| TC0700006898.hg.1 | AC005682.5     |
| TC0600008981.hg.1 | AIM1           |
| TC1900007535.hg.1 | BNIP3P27       |
| TC1600006446.hg.1 | HBA1           |
| TC0200011710.hg.1 | SNORA2         |
| TC1600006445.hg.1 | HBA2           |
| TC1200009867.hg.1 | RP11-599J14.2  |
| TC1200008618.hg.1 | RNY1P16        |
| TC0200011713.hg.1 |                |
| TC1200008569.hg.1 | teychu         |
| TC1600008930.hg.1 | lonor          |
| TC0700006899.hg.1 | SNORD93        |
| TC1900007117.hg.1 | charwy         |
| TC1100008148.hg.1 |                |
| TC0700010455.hg.1 |                |
| TC1800007583.hg.1 | CTD-2541J13.2  |
| TC0800009885.hg.1 | NKX3-1         |
| TC0600011224.hg.1 | HIST1H2BL      |
| TC0600011136.hg.1 | HIST1H2BG      |
| TC0500008777.hg.1 | KIF20A         |
| TC1800008952.hg.1 | DSEL           |
| TC0100014995.hg.1 | CNN3           |
| TC1500008110.hg.1 | RP11-382A20.1  |
| TC1200011710.hg.1 | SYCP3          |



|                              |                                |
|------------------------------|--------------------------------|
| TC0100014020.hg.1            | peyparbu                       |
| TC1200009209.hg.1            | KNTC1                          |
| TC0800009958.hg.1            | CHRNA2                         |
| TC1100010987.hg.1            | FABP5                          |
| TC1200008619.hg.1            |                                |
| TC0400006435.hg.1            | AC253576.1                     |
| TC1700007947.hg.1            |                                |
| TC0400011170.hg.1            | lerflor                        |
| TC2100007482.hg.1            | CH507-24F1.1                   |
| TC1900008564.hg.1            | ATF5; MIR4751                  |
| TC2000007341.hg.1            | FAM83D                         |
| TC0700011050.hg.1            | FIGNL1                         |
| TC1300009240.hg.1            | FABP5P1                        |
| TC0200007942.hg.1            |                                |
| TC0600007285.hg.1            | HIST1H2AE                      |
| TC0700007793.hg.1            | VN1R42P                        |
| TC2100007498.hg.1            | CH507-154B10.2; CH507-145C22.4 |
| TC0300007320.hg.1            | RNU7-128P                      |
| TC0200007773.hg.1            | klukubu                        |
| TC1000012479.hg.1            |                                |
| TC0200008502.hg.1            | NCAPH                          |
| TCUn_GL000220v100006444.hg.1 |                                |
| TC1000012477.hg.1            | HELLS                          |
| TC0300013074.hg.1            | pergubo                        |
| TC1500009756.hg.1            | RBPM52                         |
| TC2200009017.hg.1            | stofer                         |
| TC1700012391.hg.1            | MYO19                          |
| TC1500009738.hg.1            | KIAA0101; CSNK1G1              |
| TC0700013222.hg.1            | verzerby                       |
| TC0800008080.hg.1            | FABP5                          |
| TC1200011700.hg.1            | RP11-321F8.4                   |
| TC0600011232.hg.1            | HIST1H1B                       |
| TC0500009320.hg.1            | HMMR                           |
| TC0800008417.hg.1            | bawshoy                        |
| TC0100008127.hg.1            | NASP                           |
| TC0100007478.hg.1            |                                |
| TC0900008286.hg.1            | SMC2                           |
| TSUnmapped00000255.hg.1      | KIF15                          |
| TC1200006753.hg.1            |                                |
| TC0500011705.hg.1            | NREP                           |
| TC1000006819.hg.1            | MCM10                          |
| TC1500006733.hg.1            | moyzarbu                       |
| TC0100008677.hg.1            | RP4-694A7.2                    |

|                   |                             |
|-------------------|-----------------------------|
| TC1200012666.hg.1 | TMEM19                      |
| TC2100008508.hg.1 | CHAF1B                      |
| TC1200009065.hg.1 | RFC5                        |
| TC0600011184.hg.1 | HIST1H2BJ                   |
| TC0200008331.hg.1 |                             |
| TC1100008199.hg.1 | GAL                         |
| TC2200006467.hg.1 | sotara                      |
| TC0700007788.hg.1 | blusleebu                   |
| TC0900008883.hg.1 | LOC100506100; RP11-545E17.3 |
| TC1400007201.hg.1 | CDKN3                       |
| TC1400009108.hg.1 | POLE2                       |
| TC0600010949.hg.1 | dawflorby                   |
| TC0X00009336.hg.1 |                             |
| TC0500009812.hg.1 | rarslabu                    |
| TC1600011357.hg.1 |                             |
| TC1600009525.hg.1 |                             |
| TC1700009679.hg.1 | AURKB                       |
| TC2200006607.hg.1 | CDC45                       |
| TC1200008568.hg.1 | TMPO                        |
| TC0600010802.hg.1 | ELOVL2                      |
| TC1100010290.hg.1 | E2F8                        |
| TC0200011902.hg.1 | chaneebo                    |
| TC0100017834.hg.1 | GNG4                        |
| TC2000006629.hg.1 | RP5-967N21.11               |
| TC0100011351.hg.1 | tydy                        |
| TC0400008664.hg.1 | PLK4                        |
| TC1200009673.hg.1 |                             |
| TC0600007610.hg.1 | MSH5; MSH5-SAPCD1; SAPCD1   |
| TC1700008819.hg.1 |                             |
| TC1100010418.hg.1 | KIF18A                      |
| TC1700012284.hg.1 |                             |
| TC0500012670.hg.1 | GABRB2                      |
| TC0500013096.hg.1 | rasloyby                    |
| TC0600011235.hg.1 | HIST1H2AM; HIST1H3J         |
| TC1800008170.hg.1 | AC006557.1                  |
| TC0500007143.hg.1 | SKP2                        |
| TC1200011327.hg.1 | CSRP2                       |
| TC1200006767.hg.1 | OVOS                        |
| TC1700012380.hg.1 | SPAG5                       |
| TC1100008049.hg.1 | BANF1                       |
| TC2000007016.hg.1 | GINS1                       |
| TC1600008929.hg.1 |                             |
| TC0400007511.hg.1 | DANCR; MIR4449              |

|                              |                      |
|------------------------------|----------------------|
| TC1600008890.hg.1            |                      |
| TC1100012743.hg.1            |                      |
| TC1500006785.hg.1            | ARHGAP11B; ARHGAP11A |
| TC0700011969.hg.1            | MCM7                 |
| TCUn_KI270744v100006433.hg.1 | AC237676.1           |
| TC0500008054.hg.1            | POLR3G               |
| TSUnmapped00000825.hg.1      | LINC01297            |
| TC0500008544.hg.1            | LMNB1                |
| TC1400008115.hg.1            | RP11-404P21.9        |
| TC0200014404.hg.1            | MCM6                 |
| TC0100015550.hg.1            | FAM72C               |
| TC1500010311.hg.1            |                      |
| TC1200007641.hg.1            | SCN8A                |
| TC1200011651.hg.1            |                      |
| TC0600011233.hg.1            | HIST1H3I             |
| TC1700008626.hg.1            |                      |
| TC0500013145.hg.1            |                      |
| TC1900011759.hg.1            | APOC1                |
| TC0500011669.hg.1            | GJA1P1               |
| TC1700007501.hg.1            | RP11-640N20.4        |
| TC1200012699.hg.1            | CHPT1                |
| TC0700012960.hg.1            | EZH2                 |
| TC1600011280.hg.1            |                      |
| TC0300006696.hg.1            | NR2C2                |
| TC2200006641.hg.1            | RANBP1               |
| TC0100017562.hg.1            | RP4-566D2.1          |
| TC0400012644.hg.1            | SORBS2               |
| TC0100009479.hg.1            | DCLRE1B              |
| TC1200011722.hg.1            | PMCH                 |
| TC0900007129.hg.1            | MELK                 |
| TC1900010159.hg.1            | tertawbu             |
| TC1200009736.hg.1            | nawblabu             |
| TC0700012768.hg.1            |                      |
| TC2000009016.hg.1            | DSN1                 |
| TC2000006628.hg.1            | MCM8                 |
| TC2000006600.hg.1            | PCNA-AS1             |
| TC0400010649.hg.1            | RP11-1281K21.2       |
| TC1500007163.hg.1            | DUT                  |
| TC0600009381.hg.1            | CENPW                |
| TC0900007740.hg.1            | RMI1                 |
| TC0200008830.hg.1            | LINC01123            |
| TC0600011134.hg.1            | HIST1H4D             |
| TC1000007081.hg.1            | PDSS1                |

|                              |                                                          |
|------------------------------|----------------------------------------------------------|
| TC1300007038.hg.1            |                                                          |
| TC0700011289.hg.1            |                                                          |
| TC1000006794.hg.1            | DHTKD1                                                   |
| TC1500010612.hg.1            |                                                          |
| TC0100016891.hg.1            | KIF14                                                    |
| TC1900007972.hg.1            | sperwy                                                   |
| TC1200007012.hg.1            | cheenar                                                  |
| TC0600007566.hg.1            |                                                          |
| TC1700012389.hg.1            | LRRC37A8P                                                |
| TC1200007979.hg.1            |                                                          |
| TC0100017094.hg.1            | FAM72A                                                   |
| TC0700013119.hg.1            | XRCC2                                                    |
| TC1200012804.hg.1            | PRIM1                                                    |
| TC0300013740.hg.1            | gerstuby                                                 |
| TC0700008001.hg.1            |                                                          |
| TC0500007665.hg.1            | CCNB1                                                    |
| TC1700011892.hg.1            | TK1                                                      |
| TC1100008008.hg.1            | POLA2                                                    |
| TCUn_GL000195v100006435.hg.1 | LOC389831; TCONS_00030034; TCONS_00030035;<br>AC011043.1 |
| TC0100009723.hg.1            | FAM72D                                                   |
| TC0700012771.hg.1            | sworbler                                                 |
| TC2000008318.hg.1            | FERMT1                                                   |
| TC1600007235.hg.1            | PLK1                                                     |
| TC1500009345.hg.1            |                                                          |
| TC0500008454.hg.1            | PRR16                                                    |
| TC2200006461.hg.1            | LA16c-83F12.6                                            |
| TC1600009362.hg.1            | EMP2                                                     |
| TC1900006727.hg.1            | UHRF1                                                    |
| TC1200008005.hg.1            | RASSF3                                                   |
| TCUn_GL000195v100006432.hg.1 | TCONS_00030032                                           |
| TC0400006538.hg.1            | TACC3                                                    |
| TC0400007596.hg.1            | ARL9                                                     |
| TC1300009016.hg.1            |                                                          |
| TC0100012444.hg.1            |                                                          |
| TC1700010472.hg.1            | smoywubu                                                 |
| TC0900007845.hg.1            | plawtawbo                                                |
| TC0100015696.hg.1            | HIST2H2BF                                                |
| TC1500008252.hg.1            | FANCI                                                    |
| TC1700007360.hg.1            | TMEM97                                                   |
| TC0700011510.hg.1            | RFC2                                                     |
| TC1500010291.hg.1            | NMB                                                      |
| TC0400011721.hg.1            | MAD2L1                                                   |

|                         |                |
|-------------------------|----------------|
| TC1400010649.hg.1       | VRK1           |
| TC0400011748.hg.1       | CCNA2          |
| TC0100011365.hg.1       |                |
| TC0300011361.hg.1       | shoynubo       |
| TC0100009691.hg.1       | RP11-403I13.5  |
| TC1000012478.hg.1       | RP11-119K6.6   |
| TC0600009534.hg.1       | MYB            |
| TC0700007005.hg.1       | HOXA10-AS      |
| TC0600012038.hg.1       | MCM3           |
| TC1500008188.hg.1       | CTD-2262B20.1  |
| TC2200009018.hg.1       | swatey         |
| TC0300011278.hg.1       | FAM116A        |
| TC2200006986.hg.1       | blypey         |
| TC0300006575.hg.1       | FANCD2         |
| TC1700010299.hg.1       | CTD-2349P21.11 |
| TC0500007917.hg.1       | zustawby       |
| TC1100010690.hg.1       | klomaw         |
| TC0400009676.hg.1       |                |
| TC1600007884.hg.1       | RP11-44F14.10  |
| TC1900011760.hg.1       | APOC1P1        |
| TC0100017073.hg.1       | SLC45A3        |
| TC0600011143.hg.1       | HIST1H2APS4    |
| TC0600011228.hg.1       | HIST1H2AK      |
| TC0600011127.hg.1       | HIST1H1C       |
| TC1700007591.hg.1       | E2F3P1         |
| TC1200006561.hg.1       | RAD51AP1       |
| TC0400006994.hg.1       | NCAPG          |
| TC1700011897.hg.1       |                |
| TC1800008333.hg.1       | DHFR; DHFRP1   |
| TC1500006999.hg.1       | NUSAP1         |
| TC0300013447.hg.1       | RFC4           |
| TC0700013290.hg.1       | NCAPG2         |
| TC1900011060.hg.1       | LIG1           |
| TC1700010763.hg.1       | BRCA1          |
| TC0300012883.hg.1       | snervawbo      |
| TC2000008917.hg.1       | loytar         |
| TC0300007138.hg.1       | koyfawbo       |
| TC0600007268.hg.1       | HIST1H4C       |
| TC1500010880.hg.1       | TIPIN          |
| TC1000010686.hg.1       | ZWINT          |
| TC0900009572.hg.1       | stershaw       |
| TC0700012508.hg.1       |                |
| TSUnmapped00000627.hg.1 | KIF15          |

|                         |                       |
|-------------------------|-----------------------|
| TC1700009828.hg.1       |                       |
| TC0100015544.hg.1       | HIST2H2BB; HIST2H3PS2 |
| TC0600007383.hg.1       | Z98744.3              |
| TC1200011330.hg.1       | E2F7                  |
| TC1200006452.hg.1       | RNU4ATAC16P           |
| TC1200010882.hg.1       | RP11-973D8.4          |
| TC0800007552.hg.1       | MCM4                  |
| TC1300010018.hg.1       |                       |
| TC0900006683.hg.1       | sweesper              |
| TC1100011687.hg.1       | RP11-111M22.3         |
| TC1200006627.hg.1       | NCAPD2                |
| TC1600011405.hg.1       | GINS3                 |
| TC1300008280.hg.1       | SKA3                  |
| TC0500009377.hg.1       | SPDL1                 |
| TC1200010277.hg.1       | OVOS2                 |
| TSUnmapped00000190.hg.1 | KIF15                 |
| TC0600011124.hg.1       | HIST1H3B              |
| TC0600012498.hg.1       | RP11-393I2.2          |
| TC1100012031.hg.1       |                       |
| TC0400009396.hg.1       | NEIL3                 |
| TC1200008010.hg.1       | gawflubu              |
| TC1400009248.hg.1       | DLGAP5                |
| TC0500010928.hg.1       | CENPK                 |
| TC1600008901.hg.1       | stuboby               |
| TC2200006954.hg.1       | HMGB1P10              |
| TC1700009985.hg.1       | sluveebu              |
| TC1000012496.hg.1       | AS3MT                 |
| TC2100007949.hg.1       | MIS18A                |
| TC1200011096.hg.1       | buney                 |
| TC0100011871.hg.1       | HIST3H2BB             |
| TC0800008726.hg.1       | TBC1D31               |
| TC0500006472.hg.1       | TRIP13                |
| TC0200011885.hg.1       | TTC32                 |
| TC0100017298.hg.1       |                       |
| TC1700010731.hg.1       | PSMC3IP               |
| TC1600006880.hg.1       | RP11-27M24.1          |
| TC0100008150.hg.1       | RAD54L                |
| TC1800007215.hg.1       | HAUS1                 |
| TC1700012199.hg.1       | PIGL                  |
| TC0700013289.hg.1       |                       |
| TC1600011292.hg.1       | FANCA                 |
| TC0300008868.hg.1       | rasmaby               |
| TC1300007248.hg.1       | CKAP2                 |

|                              |                             |
|------------------------------|-----------------------------|
| TC0900006684.hg.1            | veesaby                     |
| TC0300009337.hg.1            | SMC4                        |
| TC1300007236.hg.1            | FABP5P2                     |
| TC0100007216.hg.1            | nokumo                      |
| TC0400010750.hg.1            | NMU                         |
| TC1100012918.hg.1            |                             |
| TC1700010847.hg.1            | GJC1                        |
| TC2100007564.hg.1            | SLC25A15P4                  |
| TC0X00006888.hg.1            | CKS1BP6                     |
| TC0200008633.hg.1            |                             |
| TC1600007718.hg.1            | ORC6                        |
| TC0800007065.hg.1            | CDCA2                       |
| TC0600012631.hg.1            | MMS22L                      |
| TC0400007581.hg.1            |                             |
| TC0100007509.hg.1            | spamerbo                    |
| TC1100013111.hg.1            | CHEK1                       |
| TC1900009360.hg.1            | AC005339.2                  |
| TC1300006969.hg.1            | LOC101929140; RP11-74J13.8  |
| TC1400009128.hg.1            | CDKL1                       |
| TC0600011137.hg.1            | AL031777.1                  |
| TC1800006484.hg.1            | NDC80                       |
| TC2100006461.hg.1            | LOC100507412; CH507-513H4.1 |
| TC1500007392.hg.1            | CCNB2                       |
| TC0300010476.hg.1            | SGOL1                       |
| TC0200012713.hg.1            | BCL11A                      |
| TC1700008625.hg.1            | RP11-583F2.2                |
| TC0300008593.hg.1            | soyberbu                    |
| TC1800009289.hg.1            | ACAA2                       |
| TC1700006991.hg.1            | moda                        |
| TC0600010951.hg.1            | spersneybu                  |
| TC1900009826.hg.1            | smertobu                    |
| TC0300006795.hg.1            | SGOL1-AS1                   |
| TC0800011679.hg.1            | ATAD2                       |
| TC0100009020.hg.1            | CDC7                        |
| TC0500007666.hg.1            | CENPH                       |
| TC0100018083.hg.1            | mimaha                      |
| TC1200007217.hg.1            |                             |
| TC0300011173.hg.1            | NT5DC2                      |
| TC1200008131.hg.1            | chuno                       |
| TC2100007487.hg.1            | Y_RNA                       |
| TC2100007504.hg.1            | Y_RNA                       |
| TCUn_GL000195v100006434.hg.1 | Y_RNA                       |
| TC1000012235.hg.1            | MKI67                       |

|                         |                              |
|-------------------------|------------------------------|
| TC0200012297.hg.1       | SRSF7                        |
| TC0300008702.hg.1       | MCM2                         |
| TC1500007549.hg.1       |                              |
| TC1200008544.hg.1       | NEDD1                        |
| TC0400008580.hg.1       |                              |
| TC1000008471.hg.1       | KIF11                        |
| TC1300008079.hg.1       |                              |
| TC0800007119.hg.1       | ESCO2                        |
| TC1200008113.hg.1       | NUP107                       |
| TC1200006510.hg.1       |                              |
| TSUnmapped00000642.hg.1 | AC254944.3                   |
| TC0600007543.hg.1       | MDC1-AS1; XXbac-BPG27H4.7    |
| TC1900007587.hg.1       |                              |
| TC2200006465.hg.1       | LL22NC03-N64E9.1             |
| TC0100014543.hg.1       | DEPDC1                       |
| TC0200006977.hg.1       | CENPO                        |
| TC1500006938.hg.1       | RP11-133K1.11                |
| TC0200013878.hg.1       | BUB1                         |
| TC2000008279.hg.1       | PCNA                         |
| TC0400009037.hg.1       | MND1                         |
| TC1200007559.hg.1       | TROAP                        |
| TC1100010065.hg.1       | sermer                       |
| TC1200010795.hg.1       | RARG                         |
| TC1700011364.hg.1       | BRIP1                        |
| TC0100011346.hg.1       |                              |
| TC1700009627.hg.1       | YBX2                         |
| TC0400009779.hg.1       | Y_RNA                        |
| TC1800008233.hg.1       |                              |
| TC1200007819.hg.1       | CDK2                         |
| TC0500008309.hg.1       | CAMK4                        |
| TC1200009621.hg.1       | FOXM1                        |
| TC1200008134.hg.1       | YEATS4                       |
| TC2100006510.hg.1       |                              |
| TC1900011696.hg.1       | CTD-2291D10.4                |
| TC0500011280.hg.1       | DHFR                         |
| TC2100006477.hg.1       | LOC100507412; CH507-528H12.1 |
| TC1100013165.hg.1       | SLC43A3                      |
| TC1500009147.hg.1       | torpor                       |
| TC0800009646.hg.1       | farblorby                    |
| TC0700009861.hg.1       |                              |
| TC0100015507.hg.1       | HIST2H3DP1                   |
| TC2100006449.hg.1       | CH507-254M2.3                |
| TC1900007498.hg.1       |                              |



|                                         |                |
|-----------------------------------------|----------------|
| TC0X00011353.hg.1                       | ASB9           |
| TC0100015563.hg.1                       | plawmeybo      |
| TC0400007714.hg.1                       |                |
| TC1900007116.hg.1                       | gugly          |
| TC1500007699.hg.1                       | KIF23          |
| TC0600011379.hg.1                       | MDC1           |
| TC1100011288.hg.1                       | MRPL11         |
| TC0100011582.hg.1                       | gornubu        |
| TC1700008066.hg.1                       | vuslaw         |
| TC0100009702.hg.1                       | snuzeybo       |
| TC0600011234.hg.1                       | HIST1H4L       |
| TC0700006605.hg.1                       |                |
| TC0900009418.hg.1                       | flupawbu       |
| TC0500010515.hg.1                       | NUP155         |
| TC1300006802.hg.1                       | BRCA2          |
| TC1500010421.hg.1                       | RP11-617F23.1  |
| TC0500010655.hg.1                       |                |
| TC0100014431.hg.1                       | DLEU2_6        |
| TC0200016553.hg.1                       | DAPL1; OR7E89P |
| TC0500010599.hg.1                       | OXCT1          |
| TC0X00011365.hg.1                       | SSX5           |
| TC17_GL000205v2_random000064<br>40.hg.1 | Y_RNA          |
| TC2100007505.hg.1                       | CH507-338C24.1 |
| TC1500007077.hg.1                       | WDR76          |
| TC1900006628.hg.1                       | NFIC           |
| TC2200009288.hg.1                       | TRMU           |
| TC0200015093.hg.1                       | ZNF385B        |
| TC0100014880.hg.1                       |                |
| TC1500007781.hg.1                       | zeyper         |
| TC0100013369.hg.1                       | STMN1; MIR3917 |
| TC1700011469.hg.1                       | RP11-927P21.12 |
| TC0400007478.hg.1                       | RP11-1281K21.8 |
| TC1900010144.hg.1                       | CTD-2561J22.5  |
| TC1500010463.hg.1                       | PRC1           |
| TC0800011137.hg.1                       | RAD54B; FSBP   |
| TC2000009026.hg.1                       | RBL1           |
| TC0500013330.hg.1                       |                |
| TC0600011225.hg.1                       | HIST1H2AJ      |
| TC1100007995.hg.1                       | CDCA5          |
| TC0400012481.hg.1                       |                |
| TC1500006963.hg.1                       | CASC5          |
| TC0600011451.hg.1                       | RNU6-850P      |

|                         |                                |
|-------------------------|--------------------------------|
| TC0100015701.hg.1       | HIST2H3A; HIST2H3C             |
| TC0600007266.hg.1       | HIST1H1C                       |
| TC1200012572.hg.1       | ITFG2                          |
| TC0300009975.hg.1       | flarnarbo                      |
| TC0600011917.hg.1       |                                |
| TC0800008120.hg.1       | LRRCC1                         |
| TC0700010497.hg.1       | SUMO2P14                       |
| TC0600013602.hg.1       | FBXO5                          |
| TC0800010980.hg.1       | RP11-98H4.4                    |
| TC0X00007180.hg.1       |                                |
| TC2200007130.hg.1       |                                |
| TC0300006964.hg.1       | nawfubo                        |
| TC2200009167.hg.1       |                                |
| TC1300008291.hg.1       | HIST1H2BPS3                    |
| TC0100012287.hg.1       |                                |
| TC0600012845.hg.1       |                                |
| TC1200012533.hg.1       | POLE                           |
| TC1500007829.hg.1       | LOXL1                          |
| TC0100013455.hg.1       | RPA2                           |
| TC2100007496.hg.1       | CH507-154B10.1; CH507-145C22.3 |
| TC2100006445.hg.1       | Y_RNA                          |
| TC2000007438.hg.1       | MYBL2                          |
| TC1700008438.hg.1       | RAD51C                         |
| TC2000007089.hg.1       | TPX2                           |
| TC0200007999.hg.1       | ZNF638                         |
| TC1200007208.hg.1       | DDX11                          |
| TC2100008307.hg.1       | stogu                          |
| TC0100008057.hg.1       | CDC20                          |
| TSUnmapped00000695.hg.1 | ARHGAP11A                      |
| TC1700011012.hg.1       |                                |
| TC1600007017.hg.1       | CTB-193M12.5                   |
| TC1000008585.hg.1       | MARVELD1                       |
| TC0700013162.hg.1       | PAXIP1                         |
| TC1500009353.hg.1       | CEP152                         |
| TC0700007804.hg.1       | SNORA63                        |
| TC0400009856.hg.1       | LYAR                           |
| TC1500006447.hg.1       | CHEK2P2                        |
| TC0200010484.hg.1       | gaklu                          |
| TC1600010592.hg.1       |                                |
| TC0400009181.hg.1       | RP11-218F10.3                  |
| TC1700009888.hg.1       | CENPV                          |
| TC0400009683.hg.1       | AC092574.2                     |
| TC0100011581.hg.1       | CENPF                          |

|                   |                       |
|-------------------|-----------------------|
| TC0100007045.hg.1 | snurawbo              |
| TC1700009484.hg.1 | RP11-235E17.4         |
| TC0X00009606.hg.1 | SSX3                  |
| TC1600008924.hg.1 | POLR3K                |
| TC1100012030.hg.1 | werchee               |
| TC0300006720.hg.1 |                       |
| TC1600007177.hg.1 | leypo                 |
| TC1100012948.hg.1 | IFITM2                |
| TC0700007198.hg.1 | ANLN                  |
| TC0100015705.hg.1 |                       |
| TC0100016441.hg.1 | CENPL                 |
| TC0100006443.hg.1 | storubu               |
| TC1700010451.hg.1 | RDM1                  |
| TC2200007838.hg.1 | AC116618.1            |
| TC1000012564.hg.1 | DNAJC9                |
| TC1100009657.hg.1 | IFITM3                |
| TC0300009524.hg.1 | ECT2                  |
| TC0700007349.hg.1 | stawblar              |
| TC1100013021.hg.1 | FEN1                  |
| TC1400009242.hg.1 | WDHD1                 |
| TC0100009877.hg.1 | HIST2H3A              |
| TC1600010591.hg.1 |                       |
| TC1500009934.hg.1 | RP11-673C5.1          |
| TC1300006847.hg.1 | RFC3                  |
| TC0100010397.hg.1 | NUF2                  |
| TC0100008023.hg.1 | PPIH                  |
| TC0600011185.hg.1 | HIST1H2BK             |
| TC0500010514.hg.1 | CTD-2124B8.2          |
| TC1600009922.hg.1 |                       |
| TC1000008482.hg.1 | CEP55                 |
| TC1100012513.hg.1 | H2AFX                 |
| TC1000008385.hg.1 | STAMBPL1              |
| TC0900006736.hg.1 | CNTLN                 |
| TC1700009204.hg.1 | RP11-498C9.16         |
| TC1400007173.hg.1 | RP11-589M4.1; tawwobo |
| TC0400012620.hg.1 | CENPU                 |
| TC1700012265.hg.1 | MEIOC                 |
| TC0600007380.hg.1 | HIST1H2AL; HIST1H2BN  |
| TC2200008847.hg.1 | CENPM                 |
| TC0100013426.hg.1 | snoymerbo             |
| TC0200007558.hg.1 | AC007682.2            |

Supplementary Table 2. List of genes  $\geq 2$ -fold elevated in control shRNA vs. AR shRNA

| Control shRNA vs. AR shRNA |                                                  |
|----------------------------|--------------------------------------------------|
| ID                         | GeneID                                           |
| TC0700008367.hg.1          | PEG10                                            |
| TC1100007727.hg.1          | FAM111B                                          |
| TC1100011050.hg.1          | FADS1; MIR1908                                   |
| TC1000007641.hg.1          | DKK1                                             |
| TC0700011642.hg.1          | HGF                                              |
| TC0Y00007289.hg.1          | rarsybo                                          |
| TC0Y00007293.hg.1          |                                                  |
| TC0700013538.hg.1          | TRGJ1; TRGC2; TRGJ2; TRGV9; TRGC1; TRGJP; TRGJP2 |
| TC0600009262.hg.1          | SLC35F1                                          |
| TC0800008845.hg.1          | MYC                                              |
| TC0Y00007306.hg.1          |                                                  |
| TC0Y00007285.hg.1          | zeybu                                            |
| TC0500011502.hg.1          | ELL2                                             |
| TC0700007952.hg.1          | storslerbu                                       |
| TC0Y00007290.hg.1          | vubo                                             |
| TC1600007521.hg.1          | FUS                                              |
| TC0700012780.hg.1          | HIPK2                                            |
| TC0100007783.hg.1          | RP11-435D7.3                                     |
| TC0100014766.hg.1          | LPAR3                                            |
| TSUnmapped00000546.hg.1    | RCC2                                             |
| TC1900008551.hg.1          | BCL2L12                                          |
| TC0300008148.hg.1          | TMEM45A                                          |
| TC0700008094.hg.1          | ZP3                                              |
| TC1900007162.hg.1          | AC022098.2                                       |
| TC0800010303.hg.1          | RP11-598P20.3                                    |
| TC1900007880.hg.1          | AC002398.12                                      |
| TC0100012869.hg.1          | SRM                                              |
| TC0Y00007303.hg.1          | sharbo                                           |
| TC0Y00007308.hg.1          | blerbo                                           |
| TC0100015805.hg.1          | CELF3                                            |
| TC0300008029.hg.1          | EPHA3                                            |
| TC0X00009069.hg.1          | ARHGAP6                                          |
| TC1200010490.hg.1          | NELL2                                            |
| TC1200010561.hg.1          |                                                  |
| TC0700011842.hg.1          | PDK4                                             |
| TC0600011074.hg.1          | glosoby                                          |
| TC0600007660.hg.1          |                                                  |
| TC0500010766.hg.1          | PLPP1; RNF138P1                                  |
| TC0800008663.hg.1          | MAL2                                             |

|                         |                             |
|-------------------------|-----------------------------|
| TC1000007714.hg.1       | PHYHIPL                     |
| TC0500007542.hg.1       | NDUFAF2                     |
| TC0100016321.hg.1       | GCSH                        |
| TC0600008721.hg.1       |                             |
| TC0100015920.hg.1       | RP11-61L14.6; subaw         |
| TC0500007738.hg.1       | MAP1B                       |
| TC1200010988.hg.1       | LOC100506844; RP11-620J15.3 |
| TC1900010494.hg.1       | HSPB6                       |
| TC1000011748.hg.1       |                             |
| TC0400008331.hg.1       | NPNT                        |
| TC1300008888.hg.1       | kerchee                     |
| TSUnmapped00000427.hg.1 | FBL                         |
| TC1100008962.hg.1       |                             |
| TC0X00010136.hg.1       | TAF9B                       |
| TC0100016649.hg.1       | NMNAT2                      |
| TC0400011744.hg.1       | ANXA5                       |
| TC1600010181.hg.1       | NETO2                       |
| TC1900011004.hg.1       | SLC1A5                      |
| TC0800011376.hg.1       | RP11-1C8.4; RP11-1C8.7      |
| TC1000010758.hg.1       | RTKN2                       |
| TC0600012379.hg.1       | ELOVL4                      |
| TC1900008609.hg.1       |                             |
| TC0700010509.hg.1       | CYCS                        |
| TC1200012263.hg.1       | MPHOSPH9                    |
| TC0100013087.hg.1       | RCC2                        |
| TC0100015875.hg.1       | ILF2                        |
| TC1500007814.hg.1       | NEO1                        |
| TC1400010624.hg.1       | PTGR2                       |
| TC1300008660.hg.1       | PROSER1                     |
| TC1600007897.hg.1       | chaworbu                    |
| TC0400009376.hg.1       | WDR17                       |
| TC0500012138.hg.1       | SPOCK1                      |
| TC0400011429.hg.1       | DDIT4L                      |
| TC0X00010532.hg.1       | AMOT; MIR4329               |
| TC2100006714.hg.1       | NCAM2                       |
| TC0600011145.hg.1       | HIST1H4H                    |
| TC0300009610.hg.1       | NDUFB5                      |
| TSUnmapped00000776.hg.1 | FBL                         |
| TC1100010464.hg.1       | RP1-65P5.3                  |
| TC0800008299.hg.1       | SDC2                        |
| TC1100007718.hg.1       | GLYATL1P2                   |
| TC0200011080.hg.1       | COPS7B                      |
| TC1600011573.hg.1       | GCSH                        |

|                         |                          |
|-------------------------|--------------------------|
| TC0200011913.hg.1       | RP11-130L8.3             |
| TC1900011136.hg.1       | LOC101928295; AC010524.2 |
| TC0300007973.hg.1       | CADM2                    |
| TC1800008550.hg.1       | SYT4                     |
| TC1700010199.hg.1       | PIGS                     |
| TC0700009909.hg.1       |                          |
| TC0200016643.hg.1       | DNMT3A                   |
| TC0500008602.hg.1       | LYRM7                    |
| TC1400009184.hg.1       | TXNDC16                  |
| TC1100012197.hg.1       | GUCY1A2                  |
| TC0600012495.hg.1       | CGA                      |
| TC1400008098.hg.1       | GLRX5                    |
| TC0X00010322.hg.1       |                          |
| TC0X00009661.hg.1       | SYP                      |
| TC0700012728.hg.1       | PTN                      |
| TC0Y00007035.hg.1       |                          |
| TC0100016060.hg.1       | ELL2P1                   |
| TC1400007086.hg.1       | LRR1; RHOQP1             |
| TSUnmapped00000162.hg.1 | FBL                      |
| TC0700008110.hg.1       |                          |
| TC0100011033.hg.1       |                          |
| TC1700012093.hg.1       | FASN                     |
| TC2000009648.hg.1       | PRELID3B; ATP5E          |
| TC0600008447.hg.1       | ADGRB3                   |
| TC0200008606.hg.1       | AC092667.2               |
| TC1600007899.hg.1       |                          |
| TC0100018338.hg.1       | NAV1                     |
| TC1400008531.hg.1       | marla                    |
| TSUnmapped00000336.hg.1 | RCC2                     |
| TC1900006637.hg.1       |                          |
| TC1100007883.hg.1       |                          |
| TC0100017365.hg.1       | EPRS                     |
| TC1300007791.hg.1       | IPO5                     |
| TC0100014930.hg.1       | EVI5                     |
| TC1300009558.hg.1       |                          |
| TC1900009287.hg.1       | SMIM24                   |
| TC1100012981.hg.1       | RCN1                     |
| TC1500008312.hg.1       | IQGAP1                   |
| TC1900010782.hg.1       | ATP1A3                   |
| TC1700010358.hg.1       | MYO1D                    |
| TSUnmapped00000344.hg.1 | FBL                      |
| TC0400012432.hg.1       | HMGB2                    |
| TC0500010337.hg.1       | CTD-2533K21.1            |

|                         |                |
|-------------------------|----------------|
| TSUnmapped00000732.hg.1 | SLC37A4        |
| TC0600008132.hg.1       | CDC5L          |
| TC0100018199.hg.1       | SRRM1          |
| TC1500010655.hg.1       | CHSY1          |
| TC2200007615.hg.1       | RIBC2          |
| TC1600007169.hg.1       | METTL9         |
| TC0300014041.hg.1       | RUVBL1         |
| TC0700009020.hg.1       | SND1; SND1-IT1 |
| TC0400012459.hg.1       | klogy          |
| TC0900006591.hg.1       | RP11-390F4.6   |
| TC1800008175.hg.1       |                |
| TC0200010636.hg.1       | MAP2           |
| TC0100016003.hg.1       | IQGAP3         |
| TC0400007731.hg.1       | MT2P1          |
| TC0500008135.hg.1       | jjja           |
| TC0700007949.hg.1       | POM121         |
| TC1600007965.hg.1       | MT1F           |
| TC0500009863.hg.1       | LPCAT1         |
| TC1000011989.hg.1       | SNORA19        |
| TC0400012949.hg.1       | SLC39A8        |
| TC0700008295.hg.1       | CFAP69         |
| TC1800009309.hg.1       | CBLN2          |
| TC1600007963.hg.1       | MT1DP          |
| TC0700006750.hg.1       |                |
| TC0700007973.hg.1       | POM121B        |
| TC1700011298.hg.1       | TUBD1          |
| TC0100012687.hg.1       | NOL9           |
| TC0100015715.hg.1       | SF3B4          |
| TC0300008173.hg.1       | PCNP           |
| TC1200009748.hg.1       | ZNF384         |
| TC0600007158.hg.1       | SOX4           |
| TC0X00009441.hg.1       | MED14          |
| TC2000007435.hg.1       | IFT52          |
| TC1300008487.hg.1       | SLC7A1         |
| TC0300012157.hg.1       | RABL3          |
| TC1600008228.hg.1       | CYB5B          |
| TC0X00007522.hg.1       | FAM155B        |
| TC1400009190.hg.1       | GNPNAT1        |
| TC0800010911.hg.1       | vawweeby       |
| TC0700011550.hg.1       | POM121C        |
| TC0X00009254.hg.1       | APOO           |
| TC1900009984.hg.1       | UNC13A         |
| TC1200007499.hg.1       | TMEM106C       |

|                         |                              |
|-------------------------|------------------------------|
| TC2200007952.hg.1       | CLTCL1                       |
| TC0700008111.hg.1       | hekamu                       |
| TC0400009359.hg.1       |                              |
| TC1400007039.hg.1       | FANCM                        |
| TC0900006968.hg.1       | SPINK4                       |
| TC1200011770.hg.1       | ALDH1L2                      |
| TC1600007964.hg.1       | MT1B; MT1CP                  |
| TC1600007141.hg.1       | LOC81691; AC004381.6; U4atac |
| TC0700006468.hg.1       |                              |
| TC0900007362.hg.1       | nihumu                       |
| TC1000010920.hg.1       | gleesmey                     |
| TC1100010615.hg.1       |                              |
| TC1600007835.hg.1       | MIR548A1                     |
| TC1300006886.hg.1       | RFXAP                        |
| TC0100010150.hg.1       |                              |
| TC1400009676.hg.1       | RP5-1021I20.8                |
| TC0200008129.hg.1       | RP11-342K6.2                 |
| TC1600007958.hg.1       | MT1L                         |
| TC1300009376.hg.1       | SLITRK1                      |
| TC1900010032.hg.1       | CERS1; GDF1                  |
| TC2200008610.hg.1       | FOXRED2                      |
| TC0100018521.hg.1       | TSTD1                        |
| TC0700012806.hg.1       |                              |
| TC0800011041.hg.1       | MMP16                        |
| TC1000008484.hg.1       |                              |
| TC1300009675.hg.1       | noynoy                       |
| TC2000008072.hg.1       | PPDPF                        |
| TC0900011305.hg.1       | TNC                          |
| TC1600010711.hg.1       | CHTF8                        |
| TC0300007292.hg.1       | RP11-447D11.3                |
| TC0700012151.hg.1       | nerju                        |
| TC1100011078.hg.1       | CTD-2531D15.5                |
| TC0700009669.hg.1       | RP4-584D14.7                 |
| TC0100014988.hg.1       | F3                           |
| TC1600010300.hg.1       | cheypor                      |
| TC0800012069.hg.1       | jozuby                       |
| TC0400006727.hg.1       | AFAP1-AS1                    |
| TC0100013854.hg.1       | SCMH1                        |
| TC0700011710.hg.1       | SLC25A40                     |
| TC0500009009.hg.1       | TCERG1                       |
| TC0200014728.hg.1       | LY75-CD302; CD302; LY75      |
| TSUnmapped00000071.hg.1 | AC004824.4                   |
| TC1000007925.hg.1       | EIF4EBP2                     |



|                              |                             |
|------------------------------|-----------------------------|
| TC1400008420.hg.1            | CTD-2134A5.3                |
| TC2200007025.hg.1            | plobo                       |
| TC0700008123.hg.1            | spyorbo                     |
| TC1200010642.hg.1            | FAIM2                       |
| TC0900010438.hg.1            |                             |
| TSUnmapped00000380.hg.1      | FBL                         |
| TC1000006859.hg.1            | SUV39H2                     |
| TC1700010248.hg.1            | GIT1                        |
| TSUnmapped00000061.hg.1      | FBL                         |
| TC0400012634.hg.1            | CFAP97                      |
| TC1700010855.hg.1            | poyda                       |
| TCUn_GL000224v100006436.hg.1 | AL591856.6                  |
| TCUn_KI270741v100006433.hg.1 | AUXG01000516.2              |
| TC0700010321.hg.1            | ETV1                        |
| TC0X00009494.hg.1            | RRM2P3                      |
| TC1700012223.hg.1            | SUZ12P1                     |
| TC0800010245.hg.1            | RP11-360L9.7                |
| TC2100006581.hg.1            | AP001347.6; ERLEC1P1        |
| TC0100018425.hg.1            | RP1-317E23.3; horo          |
| TC1100013173.hg.1            | C11orf98; LBHD1             |
| TC0200009349.hg.1            | C2orf27A; TCONS_I2_00015489 |
| TC1200009031.hg.1            | RNFT2                       |
| TC0100018242.hg.1            | HS2ST1                      |
| TC0200009440.hg.1            | R3HDM1                      |
| TC0100010148.hg.1            | LAMTOR2                     |
| TC0300013906.hg.1            | KCNMB2                      |
| TC0800006840.hg.1            |                             |
| TC0700012036.hg.1            | VGf                         |
| TC1400006471.hg.1            | BMS1P18; BMS1P17            |
| TC1100009419.hg.1            | EI24                        |
| TC0100007215.hg.1            |                             |
| TC0800012206.hg.1            | DGAT1; MIR6848              |
| TC0200015194.hg.1            | TFPI                        |
| TC1000008733.hg.1            | MFSD13A                     |
| TC0200014268.hg.1            | darpo                       |
| TC1700012189.hg.1            | SENP3                       |
| TC0300007055.hg.1            | CTDSPL                      |
| TC0300007610.hg.1            | PXK                         |
| TC1900010125.hg.1            |                             |
| TC0100011870.hg.1            | AL139288.1                  |
| TC0700007950.hg.1            | sterslerbu                  |

|                                         |                                 |
|-----------------------------------------|---------------------------------|
| TC1400009066.hg.1                       | MIS18BP1                        |
| TC2200007138.hg.1                       | FBXO7                           |
| TC0X00010796.hg.1                       | ank.59                          |
| TC1200010690.hg.1                       | CSRNP2                          |
| TC0X00009139.hg.1                       | AP1S2                           |
| TC0500012296.hg.1                       | LOC729080                       |
| TC0700007810.hg.1                       | RP13-157F18.2                   |
| TC1600010071.hg.1                       | RP11-67H24.1                    |
| TC0100015950.hg.1                       | FAM189B                         |
| TC1200007985.hg.1                       |                                 |
| TC0500009422.hg.1                       | NPM1                            |
| TC0100011239.hg.1                       | HNRNPA1P59                      |
| TC1200007835.hg.1                       | COQ10A                          |
| TC0200015755.hg.1                       | CRYBA2                          |
| TC0200007045.hg.1                       | jeyparbo                        |
| TC1500009532.hg.1                       | zarzerbu                        |
| TC0700009150.hg.1                       | RP11-2E11.9                     |
| TC1_KI270708v1_random000<br>06433.hg.1  | AL137861.1                      |
| TC14_KI270722v1_random00<br>006433.hg.1 | AC138774.2                      |
| TC0100014331.hg.1                       | HNRNPA1P6                       |
| TC0X00011401.hg.1                       | RBMX; SNORD61                   |
| TC1700008178.hg.1                       | ATP5G1                          |
| TC0800007735.hg.1                       | UBXN2B                          |
| TC0500010846.hg.1                       | jawflu                          |
| TC0900012168.hg.1                       | MRRF                            |
| TC0900007369.hg.1                       | LOC728673; GLIDR; RP11-262H14.4 |
| TC1600010509.hg.1                       | APOOP5                          |
| TC1700010538.hg.1                       | AC006449.2                      |
| TC1500009736.hg.1                       | PPIB                            |
| TC1500009749.hg.1                       | blawzeybu                       |
| TC0700012878.hg.1                       | RP11-556I13.1                   |
| TC0500010852.hg.1                       | kufllu                          |
| TC1100011808.hg.1                       | RP11-727A23.7                   |
| TC0800007431.hg.1                       | AP3M2                           |
| TC0100011849.hg.1                       |                                 |
| TC0200014978.hg.1                       | OLA1                            |
| TC0900010114.hg.1                       | AL353626.1                      |
| TC1700010926.hg.1                       | ninoma                          |
| TC0400011173.hg.1                       | HNRNPDL                         |
| TC0800006963.hg.1                       | XPO7                            |
| TC0100015352.hg.1                       | NRAS                            |

|                         |                |
|-------------------------|----------------|
| TC0600010790.hg.1       | C6orf52        |
| TC0500007532.hg.1       | PART1          |
| TC0300014052.hg.1       | RYK            |
| TC0700011643.hg.1       | HGF            |
| TC2000006559.hg.1       | CDC25B         |
| TC1100012509.hg.1       | SLC37A4        |
| TC0100007235.hg.1       |                |
| TC1600009136.hg.1       |                |
| TC0100014585.hg.1       | NEGR1          |
| TC1900011234.hg.1       | KLK11          |
| TC1900011957.hg.1       | GSK3A          |
| TC0900007012.hg.1       | Y_RNA          |
| TC0900008312.hg.1       | SLC44A1        |
| TC0500009611.hg.1       | maplabby       |
| TC0700008983.hg.1       |                |
| TC1000010853.hg.1       |                |
| TSUnmapped00000445.hg.1 | FBL            |
| TC0200016728.hg.1       | FAR2P2         |
| TC1400006567.hg.1       | AE000658.22    |
| TC0500007176.hg.1       |                |
| TC0100009056.hg.1       | CCDC18         |
| TC0200007049.hg.1       | TMEM214        |
| TC0700008107.hg.1       | klorpla        |
| TC0400009613.hg.1       | slersweebu     |
| TC1800008208.hg.1       | RP11-454P7.3   |
| TC0500011052.hg.1       | torchaby       |
| TC0500012025.hg.1       | 8-Sep          |
| TC1200011939.hg.1       | shofu          |
| TC1900011781.hg.1       | PRMT1          |
| TC1100009614.hg.1       | RP11-700F16.3  |
| TC0800008486.hg.1       |                |
| TC1600008209.hg.1       | CDH1           |
| TC1400008567.hg.1       | RP11-536C10.19 |
| TC1200007758.hg.1       | HNRNPA1        |
| TC2000007133.hg.1       | MAPRE1         |
| TC0200008921.hg.1       | TTL            |
| TC1700007132.hg.1       |                |
| TC0200010149.hg.1       | SCHLAP1        |
| TC0400006884.hg.1       | RNPS1P1        |
| TC2200009256.hg.1       | RP1-56J10.8    |
| TC0400010355.hg.1       |                |
| TC0700007407.hg.1       |                |
| TC1400007300.hg.1       | PSMA3          |

|                   |                                    |
|-------------------|------------------------------------|
| TC0900011626.hg.1 | CIZ1                               |
| TC0900009557.hg.1 | MPDZ                               |
| TC1600010815.hg.1 | LINC01572                          |
| TC1900009689.hg.1 | HNRNPA1P10                         |
| TC1400007753.hg.1 | terbeyby                           |
| TC1400008543.hg.1 | LOC100508046; CTD-2311B13.5        |
| TC0400011446.hg.1 | glysnoby                           |
| TC0500007510.hg.1 |                                    |
| TC1900007908.hg.1 | CAPNS1                             |
| TC0400008540.hg.1 | CEP170P1                           |
| TC1400008590.hg.1 | OSGEP                              |
| TC1700012342.hg.1 | DHX33                              |
| TC0600007374.hg.1 | HIST1H2AI                          |
| TC1700007427.hg.1 | chosko                             |
| TC0900012170.hg.1 | RP11-498E2.8                       |
| TC0700010678.hg.1 | LSM5                               |
| TC0800008062.hg.1 | ZBTB10                             |
| TC1600010315.hg.1 | RP11-132F7.2                       |
| TC2100006570.hg.1 |                                    |
| TC1600007752.hg.1 |                                    |
| TC1100009248.hg.1 | RNF26                              |
| TC0900008489.hg.1 |                                    |
| TC0500008136.hg.1 | jjja                               |
| TC1600006633.hg.1 | SRRM2                              |
| TC0100018326.hg.1 | LINC01351                          |
| TC1600006448.hg.1 | HBQ1                               |
| TC0400009323.hg.1 | spybeybo                           |
| TC0200013773.hg.1 | AC108868.3                         |
| TC0900012181.hg.1 | NUP188                             |
| TC0300013471.hg.1 | BCL6                               |
| TC1500007906.hg.1 | bluree; RP11-24M17.4               |
| TC1100012368.hg.1 | AP000908.1                         |
| TC0400008118.hg.1 |                                    |
| TC0700011640.hg.1 | LOC100128317; AC010091.1; vorchabu |
| TC0700006543.hg.1 | NUDT1                              |
| TC0Y00006501.hg.1 |                                    |
| TC1600007113.hg.1 | C16orf62                           |
| TC1400009734.hg.1 |                                    |
| TC1200010394.hg.1 | AC117372.1                         |
| TC0600014060.hg.1 | PSMG4                              |
| TC0300011169.hg.1 |                                    |
| TC0700010708.hg.1 |                                    |
| TC1200009235.hg.1 | C12orf65                           |

|                         |                 |
|-------------------------|-----------------|
| TC0300014064.hg.1       | PFN2            |
| TC0200013095.hg.1       | BOLA3           |
| TC0400011010.hg.1       | HNRNPA1P55      |
| TC1400008444.hg.1       |                 |
| TC1200008142.hg.1       | FRS2            |
| TC1700010767.hg.1       | RNU2-1          |
| TC1700010768.hg.1       | RNU2-1; U2      |
| TC1700010769.hg.1       | RNU2-1; U2      |
| TC1700010770.hg.1       | RNU2-1; U2      |
| TC1700010771.hg.1       | RNU2-1; U2      |
| TC1700010772.hg.1       | RNU2-1; U2      |
| TC1700010773.hg.1       | U2              |
| TC1700010774.hg.1       | U2              |
| TC1700010775.hg.1       | RNU2-1; U2      |
| TC1700010776.hg.1       | RNU2-1; U2      |
| TC1700010778.hg.1       | RNU2-1; U2      |
| TC1700010779.hg.1       | RNU2-1; U2      |
| TC0800012301.hg.1       | FAM110B         |
| TC1800006796.hg.1       | RP11-411B10.3   |
| TC0700010398.hg.1       | TMEM196         |
| TC0700010887.hg.1       | COA1            |
| TC0500011271.hg.1       | HNRNPA1P12      |
| TC1200008467.hg.1       | faney           |
| TC0900010377.hg.1       | PIGUP1          |
| TC1900011996.hg.1       | CGB8            |
| TC0200008930.hg.1       | SLC20A1         |
| TC1000008504.hg.1       | gopawby         |
| TC0100009966.hg.1       | noyply          |
| TC0600007281.hg.1       | AL031777.2      |
| TC2000009896.hg.1       | DTD1            |
| TSUnmapped00000020.hg.1 | FBL             |
| TC0600011481.hg.1       | AGPAT1; MIR6721 |
| TC1100007728.hg.1       | FAM111A         |
| TC0100009682.hg.1       | RP11-763B22.7   |
| TC0200013931.hg.1       |                 |
| TC0500011078.hg.1       |                 |
| TC0700011575.hg.1       | POMZP3          |
| TC1500010251.hg.1       | HOMER2          |
| TC1600010353.hg.1       | swarpor         |
| TC1200007874.hg.1       | merno           |
| TC0800006774.hg.1       | AC145124.1      |
| TC0200013894.hg.1       | ANAPC1          |
| TC1200006635.hg.1       | RP4-761J14.8    |

|                              |                             |
|------------------------------|-----------------------------|
| TC1300008855.hg.1            | ESD                         |
| TC1800007040.hg.1            | AC021224.1                  |
| TC0500007500.hg.1            |                             |
| TC1500007011.hg.1            | zazaw                       |
| TC1300009993.hg.1            | BIVM                        |
| TC0700012076.hg.1            | stukar                      |
| TC0700011742.hg.1            | AC002456.2                  |
| TC1900010943.hg.1            | RTN2                        |
| TC1600007957.hg.1            | MT2A                        |
| TC1100012514.hg.1            | DPAGT1                      |
| TC1000007888.hg.1            | VPS26A                      |
| TC0200016527.hg.1            | LOC100288897                |
| TC0400010653.hg.1            |                             |
| TC0600014276.hg.1            | HLA-DMB                     |
| TC0500009303.hg.1            | GABRA1                      |
| TC0X00011214.hg.1            | CTAG1B                      |
| TC1400008545.hg.1            | BMS1P18; BMS1P17            |
| TC1300008661.hg.1            | glocha                      |
| TC0800006682.hg.1            | skobla                      |
| TC0900009932.hg.1            | STOML2                      |
| TCUn_KI270742v100006438.hg.1 |                             |
| TC0900010119.hg.1            | MIR1299                     |
| TC0100011511.hg.1            |                             |
| TC0600012827.hg.1            | WASF1                       |
| TC0400012428.hg.1            |                             |
| TC0400012971.hg.1            |                             |
| TC1100008920.hg.1            |                             |
| TC2100008487.hg.1            | TPTE                        |
| TC0700013619.hg.1            | RBM28                       |
| TC1100012523.hg.1            | RP11-334E6.10               |
| TC0200016418.hg.1            | ZNF512                      |
| TC1100011388.hg.1            | AP000807.1                  |
| TC0600013079.hg.1            |                             |
| TC0100006759.hg.1            | HMG2P17                     |
| TC0100017661.hg.1            | CCSAP                       |
| TC0200006674.hg.1            | KLF11                       |
| TC1400009732.hg.1            | C14orf1                     |
| TC0600009667.hg.1            | VTA1                        |
| TC0500012674.hg.1            | rename                      |
| TC0800011226.hg.1            | LOC105375666; RP11-410L14.2 |
| TC0200013439.hg.1            |                             |
| TC1200010702.hg.1            | SMAGP                       |

|                                    |                        |
|------------------------------------|------------------------|
| TC2000009748.hg.1                  | CABLES2                |
| TC0100013407.hg.1                  |                        |
| TC0500008785.hg.1                  | EGR1                   |
| TC0400007124.hg.1                  | sutome                 |
| TC2100006906.hg.1                  | AP000255.6             |
| TC0700011733.hg.1                  |                        |
| TC1300009629.hg.1                  |                        |
| TC1200010516.hg.1                  | SLC38A1                |
| TC0600011022.hg.1                  | smutoybo               |
| TC1800009234.hg.1                  | RP11-35G9.5; ATP8B1    |
| TC0800010539.hg.1                  | RP11-648L3.2           |
| TC1300008969.hg.1                  |                        |
| TC0900009571.hg.1                  | temire                 |
| TC0600007636.hg.1                  | RNF5                   |
| TC1500008101.hg.1                  |                        |
| TC0100007035.hg.1                  | lolerbo                |
| TC0700007692.hg.1                  | ZNF716                 |
| TC0100017660.hg.1                  |                        |
| TC1300009767.hg.1                  |                        |
| TC14_GL000009v2_random0006440.hg.1 |                        |
| TC0700010692.hg.1                  | NT5C3A                 |
| TC0200010644.hg.1                  |                        |
| TC1500010244.hg.1                  | AP3B2                  |
| TC0600011916.hg.1                  | plufloybu              |
| TC0500012243.hg.1                  | spoflaw                |
| TC1600006610.hg.1                  | CCNF                   |
| TC0900010979.hg.1                  | AL353782.1             |
| TC0300006968.hg.1                  | CMTM7                  |
| TC2000008413.hg.1                  |                        |
| TC0600013464.hg.1                  | SHPRH                  |
| TC2000009914.hg.1                  | TGIF2                  |
| TC2200008872.hg.1                  | karrer                 |
| TC2000007147.hg.1                  | BPIFA4P                |
| TC0100017772.hg.1                  |                        |
| TC1500008885.hg.1                  |                        |
| TC1100006923.hg.1                  | PDE3B                  |
| TC2200007842.hg.1                  | CU463998.2             |
| TC1900011652.hg.1                  | ZNF358                 |
| TC0900010122.hg.1                  |                        |
| TC1100010339.hg.1                  | CTD-2140G10.2; zygawby |
| TC1600011570.hg.1                  | CMC2                   |
| TC0100007685.hg.1                  |                        |

|                                    |                                  |
|------------------------------------|----------------------------------|
| TC0500013321.hg.1                  | GTF2H2                           |
| TC0X00008857.hg.1                  | DKC1; SNORA36A; SNORA56; MIR664B |
| TC0X00006823.hg.1                  | POLA1                            |
| TC1200008344.hg.1                  | LRRIQ1                           |
| TC1900012001.hg.1                  | FUZ                              |
| TC1500007980.hg.1                  | CHRNA5                           |
| TC1300009595.hg.1                  |                                  |
| TC0500010853.hg.1                  | karflu                           |
| TC0100010088.hg.1                  |                                  |
| TC14_GL000009v2_random0006446.hg.1 |                                  |
| TC2200008136.hg.1                  | PRAME                            |
| TC1000011186.hg.1                  |                                  |
| TC0100011195.hg.1                  | zorkobu                          |
| TC1900010614.hg.1                  | rawsor                           |
| TC0100009579.hg.1                  | perrobo                          |
| TC0900008469.hg.1                  |                                  |
| TC0500012986.hg.1                  | LOC202181                        |
| TC0100015668.hg.1                  | RP11-326G21.1                    |
| TC1100011304.hg.1                  |                                  |
| TC0800008356.hg.1                  | skoyvawbu                        |
| TC0100011517.hg.1                  |                                  |
| TC1600008253.hg.1                  |                                  |
| TC1500009197.hg.1                  |                                  |
| TC1800008424.hg.1                  | HNRNPA1P7                        |
| TC1100007906.hg.1                  | RTN3                             |
| TC0400007476.hg.1                  | AC118282.1                       |
| TC0600007144.hg.1                  | sharblor                         |
| TC0700007694.hg.1                  |                                  |
| TC1100009102.hg.1                  | flachey                          |
| TC1700011274.hg.1                  |                                  |
| TC1200012551.hg.1                  | RNU4ATAC12P                      |
| TC0300010098.hg.1                  |                                  |
| TC2200009082.hg.1                  | AL954742.1                       |
| TC0100016235.hg.1                  | swyloybu                         |
| TC2200008415.hg.1                  | RNU6-331P                        |
| TC0100014749.hg.1                  | gleeneebu                        |
| TC0800010933.hg.1                  | RP11-363E6.3                     |
| TC1300009358.hg.1                  | pleechoy                         |
| TC1600007488.hg.1                  | goyweybu                         |
| TC1700007702.hg.1                  | SOCS7                            |
| TC0600008357.hg.1                  |                                  |
| TC0700010910.hg.1                  | POLD2                            |



|                   |                   |
|-------------------|-------------------|
| TC0700013370.hg.1 | ZNF107; MIR6839   |
| TC0700008608.hg.1 | kotoybo           |
| TC1400007728.hg.1 | CYCSP1            |
| TC1500009921.hg.1 | UACA              |
| TC0500012964.hg.1 | mawka             |
| TC0100007304.hg.1 | zyklor            |
| TC0200010923.hg.1 | speeklu           |
| TC0700009326.hg.1 | hutoya            |
| TC0800010828.hg.1 | vyzabu            |
| TC1000011333.hg.1 | vypoby            |
| TC0400011454.hg.1 |                   |
| TC1100011035.hg.1 | CPSF7             |
| TC2200009352.hg.1 | LOC400927; CSNK1E |
| TC1300007190.hg.1 | DLEU2_1           |
| TC0100017849.hg.1 | ERO1B             |
| TC0400007170.hg.1 |                   |
| TC0600013351.hg.1 | skawkloby         |
| TC0100017258.hg.1 | BATF3             |
| TC0100008996.hg.1 | ZNF326            |
| TC1100012207.hg.1 | RP11-819C21.1     |
| TC1600008053.hg.1 |                   |
| TC0400011168.hg.1 | HNRNPD            |
| TC0300013684.hg.1 | TFRC              |
| TC0900009892.hg.1 | KIF24             |
| TC0900011338.hg.1 | AL137024.1        |
| TC1200009143.hg.1 | stacho            |
| TC0100016672.hg.1 | flerkley          |
| TC0200015447.hg.1 | SUMO1             |
| TC0700012939.hg.1 |                   |
| TC0300011856.hg.1 |                   |
| TC1200007502.hg.1 |                   |
| TC1100011706.hg.1 |                   |
| TC1700006540.hg.1 |                   |
| TC1900008514.hg.1 | SNAR-G1           |
| TC1200007989.hg.1 | TMEM5             |
| TC0500011072.hg.1 | chostarby         |
| TC1100006683.hg.1 |                   |
| TC0200012262.hg.1 | keekly            |
| TC0100017605.hg.1 | swyroybu          |
| TC0400012494.hg.1 | RP11-376O6.2      |
| TC0300007224.hg.1 | blorfeebo         |
| TC0700009930.hg.1 |                   |
| TC1100007498.hg.1 |                   |

|                   |                                   |
|-------------------|-----------------------------------|
| TC0700011581.hg.1 | tachyby                           |
| TC0800006641.hg.1 | yohaya                            |
| TC0300009691.hg.1 | RP11-778D9.4                      |
| TC1900011993.hg.1 | CGB; CGB5                         |
| TC0200012091.hg.1 | ZNF512                            |
| TC1400007478.hg.1 | GPHN                              |
| TC0200016348.hg.1 | HDLBP                             |
| TC1200007892.hg.1 | ARHGEF25                          |
| TC0400011443.hg.1 | glarfloy                          |
| TC1600008709.hg.1 | COX411                            |
| TC1500007849.hg.1 | RP11-10O17.3                      |
| TC1000010420.hg.1 | boymar                            |
| TC0600009127.hg.1 | AMD1                              |
| TC1900012062.hg.1 | SLC27A5                           |
| TC1200012284.hg.1 | RP11-338K17.8                     |
| TC0100018200.hg.1 | SEPN1                             |
| TC1700011038.hg.1 | ZNF652                            |
| TC1200011093.hg.1 | RP11-338E21.1; sworner            |
| TC1100012033.hg.1 | MTMR2                             |
| TC0200013242.hg.1 |                                   |
| TC0300007437.hg.1 | MANF                              |
| TC0300007097.hg.1 | HNRNPA1P21                        |
| TC1100011372.hg.1 | CHKA                              |
| TC1500009335.hg.1 | MYEF2                             |
| TC1200008613.hg.1 | SPIC                              |
| TC0200011708.hg.1 | smeeverbo                         |
| TC0900008869.hg.1 | ODF2                              |
| TC0100013432.hg.1 | WASF2                             |
| TC1500010397.hg.1 | weyswy                            |
| TC0400007273.hg.1 | swoysmeyby                        |
| TC1200012288.hg.1 |                                   |
| TC0700008040.hg.1 | kleysharby                        |
| TC0800006447.hg.1 | FBXO25                            |
| TC1500009086.hg.1 |                                   |
| TC1500008512.hg.1 | HSP90B2P                          |
| TC1000007370.hg.1 |                                   |
| TC0700013272.hg.1 |                                   |
| TC0600007756.hg.1 | PACSIN1                           |
| TC1500010379.hg.1 | HMGB1P8                           |
| TC0900007352.hg.1 | LOC103908605; GLIDR; RP11-211N8.2 |
| TC0300008853.hg.1 | TMEM108                           |
| TC1100011933.hg.1 | TUBA1B.1                          |
| TC0700009572.hg.1 |                                   |

|                              |                                            |
|------------------------------|--------------------------------------------|
| TC1700010952.hg.1            | RP11-580116.2; rinima                      |
| TC0700008702.hg.1            |                                            |
| TC1600010316.hg.1            | TOX3                                       |
| TC0X00009160.hg.1            | RBBP7                                      |
| TC0100007048.hg.1            |                                            |
| TC2200007862.hg.1            | BMS1P18; BMS1P17                           |
| TC0700008812.hg.1            | AC003989.3                                 |
| TC0900012228.hg.1            | TOMM5                                      |
| TC1100010397.hg.1            | CCDC34                                     |
| TC0400009180.hg.1            | AC093788.1                                 |
| TC0900007403.hg.1            |                                            |
| TC0400007331.hg.1            | bersmoby                                   |
| TC2100006853.hg.1            | steevee                                    |
| TC0600010707.hg.1            | NRN1                                       |
| TC1300007719.hg.1            | spanor                                     |
| TC1700007937.hg.1            |                                            |
| TC0500011790.hg.1            |                                            |
| TC0400008527.hg.1            | steeklawby                                 |
| TCUn_GL000224v100006438.hg.1 | AL591856.2                                 |
| TCUn_KI270741v100006437.hg.1 | AUXG01000515.2                             |
| TC0500008029.hg.1            |                                            |
| TC0600011441.hg.1            | BAG6                                       |
| TC1000007303.hg.1            | ARL6IP1P2                                  |
| TC0100011720.hg.1            | RNU6-1248P                                 |
| TC2100008539.hg.1            | TCONS_I2_00001498; neroha; rawney; skarley |
| TC0700010817.hg.1            |                                            |
| TC0400008296.hg.1            |                                            |
| TC1100010763.hg.1            | Y_RNA                                      |
| TC0600013684.hg.1            |                                            |
| TC1100007543.hg.1            | jytobo                                     |
| TC1000011010.hg.1            | RP11-152N13.16                             |
| TC1700006638.hg.1            | ARRB2                                      |
| TC0500010932.hg.1            | SGTB                                       |
| TC0400012319.hg.1            |                                            |
| TC0300007076.hg.1            |                                            |
| TCUn_KI270742v100006437.hg.1 | kimuma                                     |
| TC0400010672.hg.1            |                                            |
| TC1700012270.hg.1            | CRHR1-IT1                                  |
| TC2000007260.hg.1            |                                            |
| TC0200007144.hg.1            | LCLAT1                                     |

|                              |                 |
|------------------------------|-----------------|
| TC0300010975.hg.1            | KIF9            |
| TC0400011796.hg.1            | shaspubu        |
| TC1300008199.hg.1            |                 |
| TC1600009298.hg.1            |                 |
| TC1500009504.hg.1            | PYGO1           |
| TC0200013635.hg.1            |                 |
| TC0200009305.hg.1            | CFC1B; CFC1     |
| TC0900008891.hg.1            | LRRC8A          |
| TC2000008008.hg.1            | weytar          |
| TC1200007869.hg.1            | rerplerby       |
| TC1300008144.hg.1            | TFDP1           |
| TC0700011347.hg.1            | AC068533.1      |
| TC1200009465.hg.1            | pokarby         |
| TC0900010210.hg.1            | cheybawby       |
| TC0100013220.hg.1            |                 |
| TC0100017100.hg.1            | EIF2D           |
| TC1700010015.hg.1            | B9D1            |
| TC0700008130.hg.1            |                 |
| TC0900010360.hg.1            | nusto           |
| TC1200011438.hg.1            | MGAT4C          |
| TC1100010270.hg.1            | RP11-613F22.6   |
| TC0100015575.hg.1            | sleemorbo       |
| TC0200010697.hg.1            | cherklu         |
| TC2000009965.hg.1            | FKBP1A; MIR6869 |
| TC0X00008848.hg.1            | CTAG1B; CTAG1A  |
| TC1500007091.hg.1            | CTDSPL2         |
| TC1200010944.hg.1            | ZBTB39          |
| TC0200015114.hg.1            | zawgeebo        |
| TC0Y00007282.hg.1            | SLC25A15P1      |
| TC0X00010865.hg.1            | AL591668.1      |
| TC0100017840.hg.1            |                 |
| TC1100013037.hg.1            | ARL2            |
| TC2000009980.hg.1            | LINC00654       |
| TC0500010842.hg.1            | PDE4D           |
| TC0100014924.hg.1            |                 |
| TCUn_GL000224v100006432.hg.1 | AL591856.5      |
| TC1200010040.hg.1            | zynar           |
| TC0800009729.hg.1            | terteybo        |
| TC0500010175.hg.1            | AC016575.1      |
| TC0700008610.hg.1            | steyshoyby      |
| TC0300013663.hg.1            |                 |
| TC0400011453.hg.1            | derswoby        |

|                              |                |
|------------------------------|----------------|
| TC0300009021.hg.1            |                |
| TC0800008001.hg.1            | PKMP4          |
| TC0100017044.hg.1            |                |
| TC1900011994.hg.1            | CGB1           |
| TC0200010347.hg.1            | jydawbu        |
| TC0X00009746.hg.1            |                |
| TC0300006856.hg.1            | RARB           |
| TC0500007114.hg.1            | RAI14          |
| TC2000008275.hg.1            | RP5-1116H23.4  |
| TC2200008164.hg.1            | CES5AP1        |
| TCUn_KI270741v100006434.hg.1 | AUXG01000517.1 |
| TC0200014318.hg.1            | RP11-109E12.1  |
| TC1000007738.hg.1            |                |
| TC0300013025.hg.1            | BCHE           |
| TC1100008069.hg.1            | CNIH2          |
| TC0800011589.hg.1            | snerla         |
| TC0400012672.hg.1            | vawgly         |
| TC0X00008239.hg.1            | HNRNPA1P28     |
| TC0200007187.hg.1            | slerjeebu      |
| TC1000008749.hg.1            | SFXN2          |
| TC0500011843.hg.1            |                |
| TC1200007655.hg.1            | OR7E47P        |
| TC1400010066.hg.1            |                |
| TC0200007924.hg.1            | styjorbo       |
| TC1300007724.hg.1            |                |
| TC0600010004.hg.1            | klarsneebu     |
| TC0800010503.hg.1            | NPM1P21        |
| TC1600009165.hg.1            | MMP25-AS1      |
| TC0100012274.hg.1            | sobo           |
| TC0500008568.hg.1            | SLC12A2        |
| TC1500009100.hg.1            |                |
| TC1200012103.hg.1            | kerfloby       |
| TC2100008079.hg.1            |                |
| TC0300007297.hg.1            |                |
| TC0200012143.hg.1            |                |
| TC0700006588.hg.1            |                |
| TC0600010948.hg.1            | NUP153         |
| TC0X00008394.hg.1            | BCORL1         |
| TC0700009923.hg.1            |                |
| TC0100017148.hg.1            | RP11-2P2.1     |
| TC0500008545.hg.1            | roflar         |
| TC1_KI270707v1_random000     | FP325342.1     |

|                                         |                        |
|-----------------------------------------|------------------------|
| 06433.hg.1                              |                        |
| TC1200009243.hg.1                       |                        |
| TC1100007488.hg.1                       | styloby                |
| TC0700007512.hg.1                       |                        |
| TC1900007411.hg.1                       |                        |
| TC1400008037.hg.1                       |                        |
| TC0200008659.hg.1                       | byvorbo                |
| TC0700013220.hg.1                       |                        |
| TC1700008432.hg.1                       | nersko                 |
| TC2000008191.hg.1                       |                        |
| TC0300012213.hg.1                       | merberbu               |
| TC1600010970.hg.1                       | parar                  |
| TC2100007586.hg.1                       | CYP4F29P               |
| TC1200007871.hg.1                       | smaplerby              |
| TC17_GL000205v2_random00<br>006436.hg.1 | AC011841.2             |
| TC0900007311.hg.1                       | BX088702.1             |
| TC0300006695.hg.1                       | ruhara                 |
| TC2000008790.hg.1                       |                        |
| TC1300010057.hg.1                       |                        |
| TC2100006489.hg.1                       |                        |
| TC0800009846.hg.1                       | klaslybu               |
| TC0600013132.hg.1                       | AL137006.1             |
| TC1000006648.hg.1                       | RBM17                  |
| TC1900006873.hg.1                       | CTD-2325M2.1           |
| TC0700009147.hg.1                       | MESTIT1_2              |
| TSUnmapped00000928.hg.1                 |                        |
| TC0700010031.hg.1                       | ELFN1-AS1              |
| TC0200008302.hg.1                       | AC083899.3             |
| TC0700010500.hg.1                       |                        |
| TC0X00009780.hg.1                       | FGD1                   |
| TC1200008880.hg.1                       |                        |
| TC0100013818.hg.1                       | PPT1                   |
| TC0900009653.hg.1                       | RP11-513M16.7          |
| TC0700009114.hg.1                       |                        |
| TC0500009518.hg.1                       |                        |
| TC0600012041.hg.1                       | klytyby                |
| TC0400011424.hg.1                       | H2AFZ                  |
| TC0300012408.hg.1                       | RP11-332M2.1           |
| TC0800010953.hg.1                       | HNRNPA1P4              |
| TC2100006497.hg.1                       | RP11-782C8.5           |
| TC1200009836.hg.1                       |                        |
| TC1200007552.hg.1                       | RP11-386G11.10; hunire |

|                   |                   |
|-------------------|-------------------|
| TC1600006832.hg.1 | slerwobu          |
| TC0900007741.hg.1 | fawyby            |
| TC1800007440.hg.1 | ZNF532            |
| TC1900008516.hg.1 | CGB5; CGB8        |
| TC0600012072.hg.1 | ELOVL5            |
| TC0800008321.hg.1 | LAPTM4B           |
| TC0100015048.hg.1 | MIR548N           |
| TC2100007084.hg.1 | zutaw             |
| TC0100014178.hg.1 | fermerbu          |
| TC1900010561.hg.1 | machee            |
| TC0900007995.hg.1 | MIR548AU          |
| TC0200010630.hg.1 | gyswyby           |
| TC2100007086.hg.1 | gapla             |
| TC1200012610.hg.1 | SSPN              |
| TC0300013773.hg.1 |                   |
| TC1900008410.hg.1 | slorwa            |
| TC0100007845.hg.1 | MANEAL            |
| TC0400006438.hg.1 | susiyu            |
| TC0600008275.hg.1 |                   |
| TC0600007284.hg.1 | HIST1H4E          |
| TC0600011499.hg.1 | HLA-DQB1          |
| TC1700007780.hg.1 | CASC3; MIR6866    |
| TC1000008121.hg.1 | ATP5G1P8          |
| TC2200009286.hg.1 | PRR34-AS1         |
| TC0100009385.hg.1 | RP5-1074L1.4      |
| TC0800010174.hg.1 | RNF5P1            |
| TC0900009878.hg.1 | UBAP2andSNORD121B |
| TC0800012083.hg.1 |                   |
| TC0500010899.hg.1 | RP11-95I19.1      |
| TC0700011480.hg.1 | Y_RNA             |
| TC0100018085.hg.1 | ZNF670andZNF695   |
| TC0700008098.hg.1 | Y_RNA             |
| TC0700008622.hg.1 | Y_RNA             |
| TC0400006653.hg.1 |                   |
| TC0800007731.hg.1 | kehare            |
| TC0100007968.hg.1 | NFYC              |
| TC1900008593.hg.1 | SNAR-F            |
| TC1200007811.hg.1 | TMEM198B          |
| TC1200012759.hg.1 | PRH1-PRR4         |
| TC0100010649.hg.1 | smawlybu          |
| TC0400011764.hg.1 | vawgla            |
| TC1500007158.hg.1 | AC066612.1        |
| TC0700008317.hg.1 |                   |

|                          |              |
|--------------------------|--------------|
| TC0600010975.hg.1        | fawsnorbu    |
| TC0300012055.hg.1        | romara       |
| TC0Y00007330.hg.1        | AC006328.4   |
| TC1000008234.hg.1        | FAM213A      |
| TC1100011568.hg.1        | FCHSD2       |
| TC0900008764.hg.1        |              |
| TC0200007176.hg.1        | SLC30A6      |
| TC0X00009499.hg.1        | AL136137.1   |
| TC0600011450.hg.1        |              |
| TC0600007920.hg.1        |              |
| TC1300009768.hg.1        | skoydoby     |
| TC0600012178.hg.1        |              |
| TC0200010230.hg.1        | cheyloybo    |
| TC1800008824.hg.1        | LMAN1        |
| TC1100010399.hg.1        | peelaby      |
| TC0900007459.hg.1        |              |
| TC1900007864.hg.1        | TMEM147      |
| TC0700009093.hg.1        | SMKR1        |
| TC1200009972.hg.1        | GPR19        |
| TC1900006691.hg.1        | CHAF1A       |
| TC2000006688.hg.1        | SNAP25       |
| TC1000012329.hg.1        | BNIP3        |
| TC0700012082.hg.1        | MIR5480      |
| TC0700012879.hg.1        | nawblaw      |
| TC1000011355.hg.1        | zarsny       |
| TC0600013073.hg.1        | HDDC2        |
| TC1100008741.hg.1        | TUBAP2       |
| TC0300013428.hg.1        | TRA2B        |
| TC0300013380.hg.1        | ALG3         |
| TC1200009085.hg.1        | SRRM4        |
| TC0600008333.hg.1        |              |
| TC0200013630.hg.1        | blojybu      |
| TC0200015737.hg.1        | RP11-548H3.1 |
| TC0200015009.hg.1        | ATF2         |
| TC0800011370.hg.1        |              |
| TC0X00006540.hg.1        |              |
| TC0500009022.hg.1        | borju        |
| TC0700007319.hg.1        | HMG2P30      |
| TC0500010857.hg.1        | yoroyu       |
| TC1900011615.hg.1        |              |
| TC0100016493.hg.1        | lubu         |
| TC0400011567.hg.1        | shoybobo     |
| TCUn_GL000224v100006435. | AL591856.7   |



hg.1

TCUn\_KI270741v100006432.h

g.1

|                          |
|--------------------------|
| AUXG01000516.1           |
| AC108938.3               |
| ANAPC15                  |
| DEXI                     |
| AL136446.1               |
| HIGD1AP17                |
| geygoy                   |
| PAK1                     |
| waroybu                  |
| mehami                   |
| HNRNPA1P51               |
| ATP2A2                   |
| TC0900006882.hg.1        |
| TC1100010482.hg.1        |
| TC1100010713.hg.1        |
| TC0700008762.hg.1        |
| TC2200008467.hg.1        |
| TC0500007893.hg.1        |
| TC0200009274.hg.1        |
| TC0200012210.hg.1        |
| TC1500010496.hg.1        |
| TC1600010725.hg.1        |
| TC0500011771.hg.1        |
| TC0800007531.hg.1        |
| TC1900009806.hg.1        |
| TC0400012048.hg.1        |
| TC0500008384.hg.1        |
| TC1200010699.hg.1        |
| TC1100011536.hg.1        |
| TC1000007911.hg.1        |
| TC0300011628.hg.1        |
| TC1900010533.hg.1        |
| TC1700011053.hg.1        |
| TC0900006667.hg.1        |
| TC0200012683.hg.1        |
| TC0500010029.hg.1        |
| TC0600010054.hg.1        |
| TC0900010317.hg.1        |
| TC1600009420.hg.1        |
| TC0700012680.hg.1        |
| TC0200011702.hg.1        |
| ROBO1                    |
| ZNF850                   |
| AC006487.1               |
| AC073215.1               |
| storvorby                |
| RP11-561O23.9; LOC440839 |
| RSL1D1                   |
| SLC35B4                  |
| RP11-254F7.3             |

|                                    |                |
|------------------------------------|----------------|
| TC0200015020.hg.1                  | jarkler        |
| TC0200012785.hg.1                  | AC007098.1     |
| TC1500008151.hg.1                  |                |
| TC0100016650.hg.1                  | mularbu        |
| TC0300008395.hg.1                  |                |
| TC0X00008731.hg.1                  | VMA21          |
| TC1700010837.hg.1                  | gawwee         |
| TC1100007453.hg.1                  | MDK            |
| TC0500007721.hg.1                  | LOC728575      |
| TC0400007233.hg.1                  | shygo          |
| TC1300007091.hg.1                  |                |
| TC0400011700.hg.1                  | RP11-21110.2   |
| TC0100013137.hg.1                  | zaplu          |
| TC0500009857.hg.1                  | blorplaby      |
| TC0900010470.hg.1                  | PRUNE2         |
| TC0700009863.hg.1                  |                |
| TC1900011632.hg.1                  | ZBTB45         |
| TC1200011941.hg.1                  | klertybo       |
| TC2200007894.hg.1                  | CECR1          |
| TC1300008598.hg.1                  |                |
| TC1400007667.hg.1                  |                |
| TC1700006680.hg.1                  | loywaw         |
| TC0400006477.hg.1                  | flawvarbo      |
| TC0900007324.hg.1                  | RP11-160N1.11  |
| TC0100012103.hg.1                  | darawbo        |
| TCUn_GL000219v100006434.hg.1       | AL592183.5     |
| TC1200006707.hg.1                  |                |
| TC1200009767.hg.1                  | PHB2; SCARNA12 |
| TC1000007201.hg.1                  | moysler        |
| TC2000008666.hg.1                  | NAPB           |
| TC0400006646.hg.1                  |                |
| TC14_GL000009v2_random0006454.hg.1 |                |
| TC1700011301.hg.1                  | AC005702.4     |
| TC0500011051.hg.1                  | teechaby       |
| TC0400008907.hg.1                  | RP11-142A22.3  |
| TC0100007980.hg.1                  | CTPS1          |
| TC1900011449.hg.1                  | TNNT1          |
| TC1700011300.hg.1                  | AC005702.1     |
| TC0100010420.hg.1                  | leygoybu       |
| TC2200009061.hg.1                  |                |
| TC0700008360.hg.1                  | CASD1          |

|                                    |                   |
|------------------------------------|-------------------|
| TC1100009172.hg.1                  | zyfer             |
| TC0100009197.hg.1                  | sayaro            |
| TC1400008118.hg.1                  | AK7               |
| TC0300013491.hg.1                  | AC063932.1        |
| TC1000008066.hg.1                  | cheegloybu        |
| TC14_GL000009v2_random0006447.hg.1 | BX004987.2        |
| TC0400012378.hg.1                  | SH3RF1            |
| TC0100016709.hg.1                  | TPR               |
| TC1200011698.hg.1                  |                   |
| TC0200008759.hg.1                  | TCONS_I2_00013877 |
| TC1700008734.hg.1                  | AMZ2              |
| TC17_GL000205v2_random0006435.hg.1 | AC011841.5        |
| TC14_KI270722v1_random0006432.hg.1 | AC138774.3        |
| TC2200006922.hg.1                  |                   |
| TC2100006603.hg.1                  | AF127577.13       |
| TC1600006618.hg.1                  | RP11-715J22.6     |
| TC1900010556.hg.1                  | rawsarbo          |
| TC1900010560.hg.1                  | geyjer            |
| TC1900010562.hg.1                  | kajer             |
| TC1900010563.hg.1                  | kawjer            |
| TC0100012018.hg.1                  | RP5-827C21.2      |
| TC1400007907.hg.1                  | RP11-507K2.6      |
| TC0100015309.hg.1                  | RP3-522D1.2       |
| TC0Y00006605.hg.1                  | SNX18P1Y          |
| TC1200010902.hg.1                  | ANKRD52           |
| TC1900010951.hg.1                  | SNRPD2            |
| TC0700009074.hg.1                  | ODCP              |
| TC0200007047.hg.1                  | DPYSL5            |
| TC1200012809.hg.1                  |                   |
| TC0300009453.hg.1                  | RP11-362K14.6     |
| TC0200014107.hg.1                  | NPM1P32           |
| TC1000008423.hg.1                  | RPP30             |
| TC1600010699.hg.1                  | RP11-354M1.2      |
| TC1900011909.hg.1                  | COPE              |
| TC0500007494.hg.1                  | RAB3C             |
| TC0700008062.hg.1                  | runora; sehu      |
| TC0600008900.hg.1                  |                   |
| TC1100008183.hg.1                  | rasomi            |
| TC0900009445.hg.1                  | HNRNPA1P41        |
| TC0100012012.hg.1                  |                   |

|                                        |                                 |
|----------------------------------------|---------------------------------|
| TC2200006436.hg.1                      |                                 |
| TC0900012225.hg.1                      | RNF38                           |
| TC0200012684.hg.1                      | FANCL                           |
| TC1900011997.hg.1                      | CGB7                            |
| TC1100011286.hg.1                      | SLC29A2                         |
| TC0900011673.hg.1                      | CRAT                            |
| TC0600007911.hg.1                      | SNORD45                         |
| TC1300008957.hg.1                      | AL138696.1                      |
| TC1_KI270708v1_random000<br>06432.hg.1 | AL137861.5                      |
| TC1900010037.hg.1                      | SUGP2                           |
| TC1800009268.hg.1                      | DSC2                            |
| TC0400006706.hg.1                      | TBC1D14                         |
| TC1700010851.hg.1                      | KIF18B                          |
| TC0500007303.hg.1                      | NNT                             |
| TC1700009686.hg.1                      | SLC25A35                        |
| TC0900007769.hg.1                      | wawwyby                         |
| TC0X00011039.hg.1                      |                                 |
| TC0200013974.hg.1                      | DPP10-AS1                       |
| TC0200015815.hg.1                      | EPHA4                           |
| TC1000007852.hg.1                      | HNRNPH3                         |
| TC1600010439.hg.1                      | FAM192A                         |
| TC0500007682.hg.1                      | GTF2H2C_2; GTF2H2C; GTF2H2B     |
| TC0700010861.hg.1                      | sherchoyby                      |
| TC0900011642.hg.1                      | chuler; ODF2-AS1; RP11-339B21.9 |
| TC2000008872.hg.1                      | AL121756.1                      |
| TC0900011021.hg.1                      | TEX10                           |
| TC2100006558.hg.1                      |                                 |
| TCUn_GL000224v100006433.<br>hg.1       | AL591856.1                      |
| TC1100009576.hg.1                      | zawglee                         |
| TC2000009512.hg.1                      |                                 |
| TC1400009013.hg.1                      |                                 |
| TC0600008674.hg.1                      | RIPPLY2                         |
| TC1700010835.hg.1                      | smeewaw                         |
| TC0700008227.hg.1                      | HNRNPA1P8                       |
| TC1900008605.hg.1                      |                                 |
| TC0500007281.hg.1                      |                                 |
| TC1500010305.hg.1                      |                                 |
| TC0900006528.hg.1                      | speyrorby                       |
| TC0200014276.hg.1                      | CFC1                            |
| TC0500013423.hg.1                      | HNRNPH1                         |
| TC0100015476.hg.1                      | HMGCS2                          |

|                                         |              |
|-----------------------------------------|--------------|
| TC1800006841.hg.1                       | MIB1         |
| TC0100009146.hg.1                       | swoplo       |
| TC1900008760.hg.1                       |              |
| TC0900011103.hg.1                       |              |
| TC0900007593.hg.1                       | RORB         |
| TC1200011002.hg.1                       | LRIG3        |
| TC1600010772.hg.1                       | VAC14        |
| TC0100015192.hg.1                       | PSRC1        |
| TC0900007957.hg.1                       |              |
| TC1400007316.hg.1                       | chawwa       |
| TC0200011261.hg.1                       |              |
| TC0100015888.hg.1                       | roply        |
| TC0100009667.hg.1                       |              |
| TC2000007622.hg.1                       | smarsabu     |
| TC1500008135.hg.1                       | UBE2Q2L      |
| TC0200014269.hg.1                       | POTEI        |
| TC0300009264.hg.1                       |              |
| TC2200009116.hg.1                       | RP1-29C18.8  |
| TC0200012153.hg.1                       |              |
| TC1200012105.hg.1                       | WSB2         |
| TC0500007725.hg.1                       | BDP1         |
| TC0500013028.hg.1                       |              |
| TC17_GL000205v2_random00<br>006433.hg.1 | AC011841.3   |
| TC0300013268.hg.1                       | RP11-15L13.4 |
| TC0400010351.hg.1                       |              |
| TC0500009693.hg.1                       | snarsnybu    |
| TC0100018064.hg.1                       | Y_RNA        |
| TC0700011474.hg.1                       | flagoy       |
| TC0900010194.hg.1                       | RP11-374M1.9 |
| TC1500006436.hg.1                       | RP11-173D3.3 |
| TC1200010038.hg.1                       | EPS8         |
| TC0900011773.hg.1                       | RP11-334J6.7 |
| TC0800011317.hg.1                       | mohare       |
| TC0700010654.hg.1                       |              |
| TC1800006454.hg.1                       | RP11-769O8.2 |
| TC1600007967.hg.1                       | MT1IP        |
| TC2000007352.hg.1                       | AL121588.1   |
| TC0700008055.hg.1                       | Y_RNA        |
| TC2000007212.hg.1                       | MT1P3        |
| TC0800010540.hg.1                       | RP11-648L3.1 |
| TC0200011075.hg.1                       | PTMA         |
| TC0200016417.hg.1                       | CENPA        |

|                   |                        |
|-------------------|------------------------|
| TC1100009521.hg.1 | APLP2                  |
| TC1100010774.hg.1 |                        |
| TC1900011730.hg.1 | TIMM50                 |
| TC0400011450.hg.1 | nygo                   |
| TC0300009341.hg.1 | slogeebu               |
| TC1200011880.hg.1 | FAM222A-AS1            |
| TC1500008660.hg.1 |                        |
| TC1600010354.hg.1 | RP11-357N13.3          |
| TC1000011114.hg.1 | KCNMA1                 |
| TC0200013091.hg.1 |                        |
| TC1700009667.hg.1 | RP11-599B13.3; spoyroy |
| TC0800008253.hg.1 |                        |
| TC0100013367.hg.1 | AUNIP                  |
| TC0600012841.hg.1 | RNU6-957P              |
| TC0200013377.hg.1 | shaperbo               |
| TC0400007254.hg.1 | AC098680.1             |
| TC0100006439.hg.1 |                        |
| TC0400009378.hg.1 |                        |
| TC0300011942.hg.1 | RP11-381E24.1          |
| TC0400006946.hg.1 |                        |
| TC0100011034.hg.1 |                        |
| TC0800011460.hg.1 |                        |
| TC0400008620.hg.1 | SPATA5                 |
| TC1400008554.hg.1 | rarcharbu              |
| TC1200006751.hg.1 | LOC642846              |
| TC2000007105.hg.1 | TM9SF4                 |
| TC0300010558.hg.1 | MINOS1P3               |
| TC0900010116.hg.1 | FP565210.1             |
| TC2200006437.hg.1 |                        |
| TC0200007112.hg.1 | SNORD92                |
| TC0900007034.hg.1 | vawsta                 |
| TC1000011448.hg.1 |                        |
| TC0500007512.hg.1 |                        |
| TC2000006627.hg.1 | CHGB                   |
| TC0100008174.hg.1 | pumawbu                |
| TC1200007420.hg.1 | nyjeyby                |
| TC0100009725.hg.1 | U1                     |
| TC0500007242.hg.1 |                        |
| TC1100007069.hg.1 | GAS2                   |
| TC1200011120.hg.1 |                        |
| TC1400008736.hg.1 |                        |
| TC0100006852.hg.1 | UBIAD1                 |
| TC1300008226.hg.1 | RN7SL166P              |

|                   |                                     |
|-------------------|-------------------------------------|
| TC0500013005.hg.1 |                                     |
| TC0700008882.hg.1 | ST7; ST7-OT4; ST7-OT3; MIR6132      |
| TC0300011180.hg.1 | ploypofo                            |
| TC0400011265.hg.1 | pleebybo                            |
| TC0700010718.hg.1 | DPY19L2P1                           |
| TC1200008607.hg.1 | chawdaby                            |
| TC1500008638.hg.1 | RP11-810K23.10                      |
| TC1000010408.hg.1 | ZNF37BP                             |
| TC0500010164.hg.1 |                                     |
| TC1000011852.hg.1 |                                     |
| TC2000008277.hg.1 | RNA5SP474                           |
| TC0100018300.hg.1 | ADAM15                              |
| TC1200007755.hg.1 | LOC100132010                        |
| TC1100011266.hg.1 |                                     |
| TC0700010621.hg.1 | FKBP14                              |
| TC2100006436.hg.1 | Y_RNA                               |
| TC2100006456.hg.1 | Y_RNA                               |
| TC2100006459.hg.1 | Y_RNA                               |
| TC0100014948.hg.1 |                                     |
| TC0600011816.hg.1 | RP11-7K24.3                         |
| TC0400010354.hg.1 | bloyvobo                            |
| TC0500010497.hg.1 | NADK2                               |
| TC1200008439.hg.1 | HNRNPA1P50                          |
| TC0800011616.hg.1 | RP11-4K16.2                         |
| TC0400010465.hg.1 | UGDH                                |
| TC0400012295.hg.1 | AC005150.2                          |
| TC0700013366.hg.1 | ZNF735                              |
| TC0100014395.hg.1 |                                     |
| TC0500011852.hg.1 | LOX                                 |
| TC0700009306.hg.1 |                                     |
| TC1200010010.hg.1 | kahimi                              |
| TC0400011616.hg.1 | TIFA                                |
| TC1500010861.hg.1 | CATSPER2P1                          |
| TC0700013574.hg.1 |                                     |
| TC1700008011.hg.1 | DBF4B                               |
| TC0200009369.hg.1 |                                     |
| TC0100012202.hg.1 | MIR4677                             |
| TC1700006637.hg.1 | LOC101559451; RP11-314A20.2; smyboy |
| TC1700010014.hg.1 | RP11-135L13.4                       |
| TC0400011359.hg.1 | UNC5C                               |
| TC1700010790.hg.1 | ETV4                                |
| TC0100015783.hg.1 | RFX5                                |
| TC0200016054.hg.1 | spawmerbo                           |

|                                  |                             |
|----------------------------------|-----------------------------|
| TCUn_GL000219v100006435.<br>hg.1 | AL592183.4                  |
| TC1000006860.hg.1                | kisaro; skylor              |
| TC0400007481.hg.1                | MTND3P22                    |
| TC0900008849.hg.1                | C9orf16                     |
| TC0100008997.hg.1                | shuzeebo                    |
| TC1600007112.hg.1                | CCP110                      |
| TC1900007965.hg.1                | muchee                      |
| TC1900007966.hg.1                | stawmo                      |
| TC0600014309.hg.1                | RP3-331H24.6                |
| TC0900011435.hg.1                |                             |
| TC1200008478.hg.1                | farchu                      |
| TC1300009229.hg.1                | MZT1                        |
| TC1700011787.hg.1                | RNF157                      |
| TC0800011546.hg.1                | parskerbu                   |
| TC0500009061.hg.1                | PCYOX1L                     |
| TC0700013087.hg.1                | fujy                        |
| TC0900009876.hg.1                | UBAP2; SNORD121A; SNORD121B |
| TC0200009312.hg.1                | POTEJ                       |
| TC0600007139.hg.1                | AL136303.1                  |
| TC1500008546.hg.1                | terchubu                    |
| TC1400010415.hg.1                |                             |
| TC2200007420.hg.1                | soytesy                     |
| TC0900009352.hg.1                |                             |
| TC2100007668.hg.1                | C21orf91; C21orf91-OT1      |
| TC1900010239.hg.1                |                             |
| TC1200007793.hg.1                | spafeyby                    |
| TC1100012710.hg.1                |                             |
| TC1700012095.hg.1                | bluter                      |
| TC1600008349.hg.1                |                             |
| TSUnmapped00000783.hg.1          | RP11-382B18.5               |
| TC0100009850.hg.1                | RP4-791M13.3                |
| TC0500007522.hg.1                |                             |
| TC1300007634.hg.1                |                             |
| TC0100012661.hg.1                | AL356693.1                  |
| TC1700008736.hg.1                |                             |
| TC0400010153.hg.1                |                             |
| TC0500008884.hg.1                | PCDHB13                     |
| TC0200010962.hg.1                |                             |
| TC0900009354.hg.1                |                             |
| TC1100009048.hg.1                | DLAT                        |
| TC1500009812.hg.1                | HNRNPA1P44                  |
| TC0400009360.hg.1                |                             |



|                                        |                      |
|----------------------------------------|----------------------|
| TC0400011486.hg.1                      | CXXC4                |
| TC0100007314.hg.1                      | shorlarbo            |
| TC1800008302.hg.1                      | RNA5SP452            |
| TC0400007926.hg.1                      | AC114801.1           |
| TC0Y00006822.hg.1                      | sworbey              |
| TC1200007206.hg.1                      | RP11-551L14.6        |
| TC0200016531.hg.1                      |                      |
| TC0500009160.hg.1                      |                      |
| TC1600008417.hg.1                      | TMPOP2               |
| TC1600007567.hg.1                      |                      |
| TC0900010095.hg.1                      | RP11-146D12.6        |
| TC1700007662.hg.1                      | CTC-268N12.3; keewer |
| TC0200013623.hg.1                      | kaklar               |
| TC1100008900.hg.1                      | C11orf70             |
| TC0400007472.hg.1                      |                      |
| TC1200010233.hg.1                      | RNU4-54P             |
| TC0100010155.hg.1                      | SEMA4A               |
| TC0800008855.hg.1                      | MIR1205              |
| TC1500007893.hg.1                      |                      |
| TC0500011094.hg.1                      |                      |
| TC0X00010336.hg.1                      | HNRNPA1P26           |
| TC1600010347.hg.1                      | RPGRIP1L             |
| TC1900010244.hg.1                      | klojaw               |
| TC0200006989.hg.1                      |                      |
| TC0300009402.hg.1                      | RP11-12K11.1         |
| TC1_KI270713v1_random000<br>06435.hg.1 | U1                   |
| TC0500013395.hg.1                      | NUDCD2               |
| TC0500008483.hg.1                      | SNX24                |
| TC1900011446.hg.1                      | stywa                |
| TC0100018261.hg.1                      | GSTM4                |
| TC0100014159.hg.1                      | kumeebu              |
| TC0100007223.hg.1                      |                      |
| TC0600011122.hg.1                      | shysnerby            |
| TC0200012786.hg.1                      |                      |
| TC0100013274.hg.1                      | meeloybu             |
| TC1100007840.hg.1                      | SCGB1D2              |
| TSUnmapped00000763.hg.1                | SLC16A1              |
| TC1300008027.hg.1                      |                      |
| TC0800008575.hg.1                      |                      |
| TC0700008022.hg.1                      | tafloyby             |
| TC1000008268.hg.1                      | HMG2P8               |
| TC0200010939.hg.1                      | steeklu              |

|                   |                                 |
|-------------------|---------------------------------|
| TC0500007973.hg.1 | speyployby                      |
| TC1200007829.hg.1 | SMARCC2                         |
| TC0400009322.hg.1 | GALNT7                          |
| TC0500013187.hg.1 | CTC-365E16.1                    |
| TC2200009266.hg.1 | GTPBP1                          |
| TC0200014297.hg.1 | swoyjubo                        |
| TC1200008626.hg.1 | jerjawby                        |
| TC1200007472.hg.1 |                                 |
| TC1000008247.hg.1 | AL356154.1                      |
| TC1500009928.hg.1 | THAP10                          |
| TC0900006974.hg.1 | poylee                          |
| TC0800008605.hg.1 | plawverby                       |
| TC1400010725.hg.1 | MDP1; NEDD8-MDP1; NEDD8; CHMP4A |
| TC1600011419.hg.1 |                                 |
| TC1400010025.hg.1 | RNU6-1258P                      |
| TC1400009744.hg.1 |                                 |
| TC1700011597.hg.1 | AC002539.2                      |
| TC0900009179.hg.1 | tarswer                         |
| TC0100009817.hg.1 | RNU1-120P                       |
| TC0700012218.hg.1 |                                 |
| TC1900010230.hg.1 | plershy                         |
| TC0500007690.hg.1 | SERF1B; SERF1A                  |
| TC0500007698.hg.1 | SERF1A                          |
| TC0600007278.hg.1 | HIST1H2BE                       |
| TC1300006535.hg.1 |                                 |
| TC0800008481.hg.1 | CTHRC1                          |
| TC1600009401.hg.1 | MIR548H2                        |
| TC0700010294.hg.1 |                                 |
| TC1100011657.hg.1 |                                 |
| TC1500007010.hg.1 | MIR626                          |
| TC0700012749.hg.1 |                                 |
| TC2000007896.hg.1 | choyraw                         |
| TC0500008314.hg.1 | AC008967.1                      |
| TC0600007040.hg.1 | soyblor                         |
| TC0700007267.hg.1 | YAE1D1                          |
| TC0100016120.hg.1 | PIGM                            |
| TC1200006730.hg.1 | RIMKLB                          |
| TC0400008906.hg.1 | RTN3P1                          |
| TC1600008851.hg.1 | TRAPPC2L                        |
| TC1800008796.hg.1 | RP11-845C23.3                   |
| TC1200011216.hg.1 | MIR1279                         |
| TC0600007290.hg.1 | HIST1H2BH                       |
| TC0300009531.hg.1 | NLGN1                           |

|                                    |                             |
|------------------------------------|-----------------------------|
| TC0X00009594.hg.1                  |                             |
| TC1200009928.hg.1                  | TAS2R19                     |
| TC1400006670.hg.1                  |                             |
| TC2000009724.hg.1                  | sukey                       |
| TC14_GL000009v2_random0006436.hg.1 |                             |
| TC0100010888.hg.1                  | valarbu                     |
| TC0100013324.hg.1                  | karubu                      |
| TC1100006929.hg.1                  | blargloy                    |
| TC0100010520.hg.1                  | feekloy                     |
| TC1200007486.hg.1                  |                             |
| TC0500012428.hg.1                  | nusteyby                    |
| TC1600008887.hg.1                  | RP11-104N10.2               |
| TC0700012556.hg.1                  | werbler                     |
| TC0900010155.hg.1                  | LOC103908605; RP11-475I24.3 |
| TC0300008953.hg.1                  |                             |
| TC1100009027.hg.1                  | gawna                       |
| TC0100016492.hg.1                  | RFWD2                       |
| TC1100009101.hg.1                  | ZBTB16                      |
| TC1900006992.hg.1                  | ILF3                        |
| TC1200006731.hg.1                  | shyblabu                    |
| TC0600013119.hg.1                  | SOGA3; KIAA0408             |
| TC0300009128.hg.1                  | borfarbo                    |
| TC1200007805.hg.1                  | snarflaw                    |
| TC0800007877.hg.1                  | farbla                      |
| TC1600007746.hg.1                  | bawworbu                    |
| TC0300009148.hg.1                  | padorbu                     |
| TC0800011315.hg.1                  | deeshoy                     |
| TC2000006665.hg.1                  | soysobu                     |
| TC1600010009.hg.1                  | RP11-388M20.6               |
| TC0800010538.hg.1                  | RP11-1112C15.2; plokor      |
| TC0300013741.hg.1                  | blonawbo                    |
| TC0100015688.hg.1                  | RP11-353N4.1                |
| TC2200007860.hg.1                  | POTEH-AS1                   |
| TC1600010375.hg.1                  | CRNDE                       |
| TC1600011418.hg.1                  | CDH3                        |
| TC0800010091.hg.1                  | RP1-273G13.2                |
| TC1700010065.hg.1                  | HNRNPA1P19                  |
| TC0900008235.hg.1                  |                             |
| TC0500011007.hg.1                  | choysmarbu                  |
| TC1400008511.hg.1                  |                             |
| TC0100011461.hg.1                  | DIEXF                       |
| TC1900009001.hg.1                  | ZIK1                        |

|                              |                |
|------------------------------|----------------|
| TC0500010668.hg.1            |                |
| TC0300007528.hg.1            | sarmoybo       |
| TC1200012281.hg.1            | EIF2B1         |
| TC0200016729.hg.1            | CYP4F62P       |
| TC0300009073.hg.1            |                |
| TC1100011972.hg.1            | flatubo        |
| TC1500006714.hg.1            | DNM1P29        |
| TC0300007645.hg.1            | PTPRG          |
| TC0600007645.hg.1            | HNRNPA1P2      |
| TC1200010891.hg.1            | RP11-603J24.17 |
| TC1500006951.hg.1            | KNSTRN         |
| TC1100012825.hg.1            | AP003041.1     |
| TC1500008932.hg.1            | U8             |
| TC1500010150.hg.1            | RP11-650L12.2  |
| TC1900011840.hg.1            | TIMM13         |
| TC1100007222.hg.1            | LINC00294      |
| TC1600006678.hg.1            | OR1F1          |
| TC0400010770.hg.1            | PPAT           |
| TC1900009774.hg.1            | AC005513.1     |
| TC0900010466.hg.1            | weeteby        |
| TC1500006539.hg.1            | nyskar         |
| TC0100012020.hg.1            | COA6           |
| TC0500007501.hg.1            |                |
| TC0200015360.hg.1            | AC019330.2     |
| TC0500009458.hg.1            | geyflaw        |
| TC0X00007525.hg.1            | U3             |
| TC0X00008730.hg.1            | Metazoa_SRP    |
| TC2000008793.hg.1            |                |
| TC0100008397.hg.1            | HNRNPA1P63     |
| TC1600007960.hg.1            | MT1M           |
| TC0800009319.hg.1            | RP11-91J19.3   |
| TC1900006578.hg.1            | SF3A2          |
| TC1900011556.hg.1            | CTC-444N24.7   |
| TC1700011549.hg.1            |                |
| TC0900006556.hg.1            | HMG2P31        |
| TC0100011364.hg.1            | SRGAP2         |
| TC1600011277.hg.1            |                |
| TC1200007844.hg.1            | RBMS2          |
| TC0200010607.hg.1            | CREB1          |
| TC1700010599.hg.1            | MED24; MIR6884 |
| TC1300008922.hg.1            | EBPL           |
| TCUn_KI270742v100006435.hg.1 |                |

|                   |                    |
|-------------------|--------------------|
| TC0700008059.hg.1 |                    |
| TC0400010025.hg.1 | glerflorby         |
| TC0100010151.hg.1 | AL355388.1         |
| TC1100008789.hg.1 |                    |
| TC1000008817.hg.1 |                    |
| TC0600014140.hg.1 | PRIM2              |
| TC1000007426.hg.1 | fumar              |
| TC0500010945.hg.1 | darvubo            |
| TC0700007825.hg.1 | RP11-252P18.1      |
| TC1000009871.hg.1 |                    |
| TC0100010085.hg.1 | CHRN2              |
| TC1600009949.hg.1 | FAM57B             |
| TC1100011077.hg.1 |                    |
| TC0100015982.hg.1 | SSR2               |
| TC0100010868.hg.1 |                    |
| TC0X00007295.hg.1 | SSXP5              |
| TC0900010676.hg.1 | HNRNPA1P14         |
| TC1600008105.hg.1 | RP11-256I9.3       |
| TC1500010449.hg.1 |                    |
| TC0100015082.hg.1 | DPH5               |
| TC1700010264.hg.1 |                    |
| TC0600009433.hg.1 | Z97352.1           |
| TC1100008269.hg.1 | lersha             |
| TC0500011123.hg.1 | RP11-79P5.9; kagey |
| TC1500007767.hg.1 |                    |
| TC1800007869.hg.1 | RP11-769O8.3       |
| TC1400009124.hg.1 | L2HGDH             |
| TC0600009323.hg.1 | jutorby            |
| TC2200008833.hg.1 | cheytey            |
| TC0800011543.hg.1 | werdeyby           |
| TC0200011711.hg.1 |                    |
| TC0800007178.hg.1 |                    |
| TC1200012259.hg.1 | blawgarby          |
| TC0600011808.hg.1 | MED20              |
| TC0900008345.hg.1 | RAD23B             |
| TC1100011404.hg.1 | MRPL21             |
| TC1500010659.hg.1 | SNRPA1             |
| TC0X00009490.hg.1 | stawgor            |
| TC0900008107.hg.1 | RP11-172F4.2       |
| TC0700013526.hg.1 | FAM126A            |
| TC0700007344.hg.1 | AC011738.1         |
| TC2100006706.hg.1 |                    |
| TC1400008388.hg.1 |                    |

|                   |               |
|-------------------|---------------|
| TC1700006504.hg.1 | RP11-818O24.2 |
| TC0200008861.hg.1 | AC114776.1    |
| TC1600010351.hg.1 | smoywoy       |
| TC0100012277.hg.1 |               |
| TC0500012453.hg.1 | RPS20P4       |
| TC0600008766.hg.1 | weejo         |
| TC1000011679.hg.1 | CUEDC2        |
| TC1600006603.hg.1 | AC009065.4    |
| TC0500007850.hg.1 | ALDH7A1P1     |
| TC0X00006740.hg.1 |               |
| TC0900007072.hg.1 | shorneybu     |
| TC0200006643.hg.1 | ASAP2         |
| TC2000009012.hg.1 |               |
| TC0600014085.hg.1 | HIST1H2AH     |
| TC0X00010849.hg.1 | GPC4          |
| TC1200006756.hg.1 |               |
| TC1300006991.hg.1 | plupa         |
| TC2200009246.hg.1 | ZNRF3         |
| TC1800008862.hg.1 | PIGN          |
| TC0300014082.hg.1 | ETV5          |
| TC0900011662.hg.1 | kortuby       |
| TC0300012539.hg.1 | mimira        |
| TC0500009766.hg.1 | CTC-338M12.9  |
| TC1500007695.hg.1 | PAQR5         |
| TC1700008309.hg.1 | AC090079.1    |
| TC0600014219.hg.1 |               |
| TC0600013604.hg.1 | RGS17         |
| TC0300006546.hg.1 | worswerby     |
| TC0900009723.hg.1 | blerplabu     |
| TC0300006830.hg.1 | Y_RNA         |
| TC0400009326.hg.1 |               |
| TC0200013331.hg.1 | LOC285074     |
| TC1300008289.hg.1 | ZDHHC20       |
| TC0100008694.hg.1 | fukley        |
| TC0700008697.hg.1 | RWDD4P1       |
| TC0X00008249.hg.1 | SLC25A5       |
| TC0200009470.hg.1 | HNMT          |
| TC1300009594.hg.1 | H2AFZP3       |
| TC0700011980.hg.1 | charployby    |
| TC1200011509.hg.1 | steyglu       |
| TC0700008603.hg.1 | sloyneeby     |
| TC1000008637.hg.1 | RP11-316M21.7 |
| TC1200011236.hg.1 |               |

|                                    |                                       |
|------------------------------------|---------------------------------------|
| TC2200008478.hg.1                  |                                       |
| TC0200010436.hg.1                  | HNRNPA1P35                            |
| TC0800010541.hg.1                  |                                       |
| TC1700010330.hg.1                  | sporgla                               |
| TC0500010670.hg.1                  | EMB                                   |
| TCUn_GL000224v100006437.hg.1       | AL591856.3                            |
| TCUn_KI270741v100006436.hg.1       | AUXG01000515.1                        |
| TC0400012754.hg.1                  | ZNF141                                |
| TC0900010435.hg.1                  |                                       |
| TC2200008919.hg.1                  |                                       |
| TC0100017604.hg.1                  | RP5-1139B12.4                         |
| TC0500013290.hg.1                  |                                       |
| TC1400007832.hg.1                  | RP11-406A9.2; rarborby                |
| TC0X00007290.hg.1                  | SSXP4                                 |
| TC1100010959.hg.1                  | LOC101927204; AP001258.4              |
| TC0400008125.hg.1                  |                                       |
| TC0600014083.hg.1                  | HIST1H2AG                             |
| TC1200009361.hg.1                  | MIR4419B                              |
| TC0300008086.hg.1                  | ARL6                                  |
| TC0900008233.hg.1                  | targo                                 |
| TC0100013949.hg.1                  | SLC6A9                                |
| TC1700006572.hg.1                  | varvarbu                              |
| TC1100009422.hg.1                  | RNU2-35P                              |
| TC0100010295.hg.1                  | klorkawbo                             |
| TC1900007688.hg.1                  | CCNE1                                 |
| TC0900010962.hg.1                  | RP11-535C21.3                         |
| TC1600009632.hg.1                  | RP11-626G11.3                         |
| TC0700008926.hg.1                  | ING3                                  |
| TC0500007162.hg.1                  |                                       |
| TC0300013707.hg.1                  | WDR53                                 |
| TC0900010200.hg.1                  | LOC102724238; LOC554249; RP11-111F5.4 |
| TC1200009847.hg.1                  | A2M                                   |
| TC0600009521.hg.1                  | LINC01010                             |
| TC0900011236.hg.1                  | INIP                                  |
| TC0600012739.hg.1                  | peegleyby                             |
| TC0900012235.hg.1                  | BX255923.2                            |
| TC0400010682.hg.1                  | SGCB                                  |
| TC4_GL000008v2_random00006438.hg.1 | AL583842.5                            |
| TCUn_KI270743v100006435.hg.1       | AC138775.1                            |
| TC1500007535.hg.1                  | RP11-317G6.1                          |

|                                        |                                |
|----------------------------------------|--------------------------------|
| TC1600009172.hg.1                      | rarnoy                         |
| TC0400008167.hg.1                      |                                |
| TC0600010728.hg.1                      |                                |
| TC0400011573.hg.1                      | sanayu                         |
| TC1000006652.hg.1                      | PFKFB3                         |
| TC0800011481.hg.1                      | perverby                       |
| TC1500008154.hg.1                      | ZSCAN2                         |
| TC0300013921.hg.1                      | PIGX                           |
| TC1800006720.hg.1                      | ANKRD62                        |
| TC0800008783.hg.1                      | SQLE                           |
| TC0500013097.hg.1                      | RP11-451H23.1                  |
| TC1000007861.hg.1                      | TET1                           |
| TC0X00007523.hg.1                      | EDA                            |
| TC1600011184.hg.1                      | KLHDC4                         |
| TC1700010274.hg.1                      | BLMH                           |
| TC1700011259.hg.1                      | SETP3                          |
| TC0700008060.hg.1                      | teeblo                         |
| TC1100009650.hg.1                      | RP11-326C3.16                  |
| TC0Y00007044.hg.1                      | AC134878.2                     |
| TC1900010091.hg.1                      | AC006539.1                     |
| TC1000010147.hg.1                      | spaswawby                      |
| TC1300006929.hg.1                      | AL512505.1                     |
| TC1300007195.hg.1                      | DLEU2_5                        |
| TC1600006636.hg.1                      | PRSS21                         |
| TC1000008731.hg.1                      | RPARP-AS1                      |
| TC0700008543.hg.1                      | RP11-758P17.2                  |
| TC0100010499.hg.1                      | POU2F1                         |
| TC0600011979.hg.1                      | RBMXP1                         |
| TC1_KI270708v1_random000<br>06434.hg.1 | AL137861.4                     |
| TC1100012596.hg.1                      | GLULP3                         |
| TC1800007233.hg.1                      | KATNAL2                        |
| TC1700007017.hg.1                      | SNORD49A; SNORD65; LRRC75A-AS1 |
| TC1400009223.hg.1                      | CNIH1                          |
| TC0300010448.hg.1                      | verdorbo                       |
| TC1500008408.hg.1                      |                                |
| TC0400012430.hg.1                      | RP11-798M19.3                  |
| TC0200016042.hg.1                      |                                |
| TC0100011727.hg.1                      |                                |
| TC0400009373.hg.1                      |                                |
| TC0100017659.hg.1                      |                                |
| TC0700009065.hg.1                      | CCDC136                        |
| TC0700012520.hg.1                      | klasnabu                       |



|                   |                     |
|-------------------|---------------------|
| TC0200011546.hg.1 |                     |
| TC1000011646.hg.1 | RNU2-59P            |
| TC0900012234.hg.1 | CBWD6; CBWD5; CBWD7 |
| TC2000007063.hg.1 |                     |
| TC0100008736.hg.1 |                     |
| TC1800007737.hg.1 |                     |
| TC0300006790.hg.1 | RPL39P18            |
| TC0700012586.hg.1 | sheebler            |
| TC0100013417.hg.1 | SLC9A1              |
| TC0200008585.hg.1 | AC019097.7          |
| TC2200006681.hg.1 | CRKL                |
| TC0200016366.hg.1 | THAP4               |
| TC0X00009908.hg.1 | RP6-159A1.2         |
| TC1500007646.hg.1 | HNRNPA1P5           |
| TC1800007862.hg.1 | sporry              |
| TC1700009211.hg.1 | RP11-498C9.13       |
| TC0200010246.hg.1 | WDR75               |
| TC0900012124.hg.1 | POLR1E              |
| TC0700011992.hg.1 | worbloybu           |
| TC0700008375.hg.1 | PPP1R9A             |
| TC2200009275.hg.1 | ADSL                |
| TC0400009705.hg.1 | peysperby           |
| TC0300011498.hg.1 | borobu              |
| TC0200012439.hg.1 | jeepawbo            |
| TC1200010109.hg.1 | LDHB                |
| TC0500008203.hg.1 |                     |
| TC0100007628.hg.1 | RP11-201O14.1       |
| TC0600009466.hg.1 |                     |
| TC0100010294.hg.1 | SUMO1P3             |
| TC1900009319.hg.1 |                     |
| TC0300009365.hg.1 |                     |
| TC0100011350.hg.1 | tykoybu             |
| TC0800009243.hg.1 | skawslubu; weyvyby  |
| TC0X00008600.hg.1 | RP3-507I15.1        |
| TC1100012691.hg.1 | dorchor             |
| TC0600009737.hg.1 |                     |
| TC2200007000.hg.1 | MIR5739             |
| TC0900010832.hg.1 |                     |
| TC0500007503.hg.1 |                     |
| TC0900008129.hg.1 | LOC100287885        |
| TC0100007214.hg.1 | RP5-930J4.4         |
| TC1000008411.hg.1 | SNRPD2P1            |
| TC0Y00007241.hg.1 | AC012005.4          |

|                              |                        |
|------------------------------|------------------------|
| TC1200009300.hg.1            | BRI3BP                 |
| TC1600010823.hg.1            |                        |
| TC1900006532.hg.1            | RPS15                  |
| TC1000008897.hg.1            |                        |
| TC1400010627.hg.1            | YLPM1                  |
| TCUn_KI270743v100006434.hg.1 | AC138775.4             |
| TC1600009994.hg.1            | joyfley                |
| TC0100011072.hg.1            |                        |
| TC0700011397.hg.1            | Y_RNA                  |
| TC1000008959.hg.1            | rormar                 |
| TC0700009916.hg.1            |                        |
| TC0200016629.hg.1            | stokla                 |
| TC0600012702.hg.1            | HACE1                  |
| TC0900010283.hg.1            | SNX18P4                |
| TC1100007844.hg.1            | ASRGL1                 |
| TC0500007103.hg.1            | RP11-1250I15.3         |
| TC0300009683.hg.1            |                        |
| TC0500010008.hg.1            | MIR4454                |
| TC0500012128.hg.1            | MIR4454                |
| TC0X00010272.hg.1            | MIR4454                |
| TC1600009332.hg.1            | RP11-473I1.5; smoysmer |
| TC1400008583.hg.1            | CCNB1IP1; SNORD126     |
| TC0700012157.hg.1            | rykaw                  |
| TC1200006672.hg.1            | PEX5                   |
| TC0100010331.hg.1            | KLHDC9                 |
| TC0100012402.hg.1            | zersabo                |
| TC0100012411.hg.1            | woysabo                |
| TC0100013891.hg.1            | lerpobu                |
| TC0100013059.hg.1            | RP5-1182A14.7          |
| TC1900009147.hg.1            | RPS15P9                |
| TC1200010134.hg.1            | kloyfy                 |
| TC1600010484.hg.1            | RP11-481J2.3           |
| TC1200007263.hg.1            | RP11-843B15.4          |
| TC0100014177.hg.1            |                        |
| TC1200006451.hg.1            | noygeeby               |
| TC0100017823.hg.1            |                        |
| TC0500013246.hg.1            | PCDHB10                |
| TC1600010494.hg.1            | CTA-331F8.1            |
| TC0700011571.hg.1            | YWHAG                  |
| TC1000011647.hg.1            |                        |
| TC0100011196.hg.1            | MIR6739                |
| TC0600011927.hg.1            | SUPT3H                 |

|                                  |                                                                                      |
|----------------------------------|--------------------------------------------------------------------------------------|
| TC1800008658.hg.1                |                                                                                      |
| TC0800008875.hg.1                | AC068570.1                                                                           |
| TC0200012756.hg.1                |                                                                                      |
| TC0200014396.hg.1                | lerklee                                                                              |
| TC1100012519.hg.1                | CBL                                                                                  |
| TC0700009004.hg.1                |                                                                                      |
| TC0100016268.hg.1                | merbar                                                                               |
| TC0700006735.hg.1                | SCIN                                                                                 |
| TC2000009606.hg.1                | bawver                                                                               |
| TC0300013774.hg.1                | LMLN-AS1                                                                             |
| TC2200007849.hg.1                | OPHN1P1                                                                              |
| TC0300010793.hg.1                |                                                                                      |
| TC1700012214.hg.1                | LOC339260; CCDC144NL-AS1; RP11-381P6.1; foyklaw;<br>TCONS_I2_00011537; RP11-344E13.3 |
| TC1000010901.hg.1                | AL138925.1                                                                           |
| TC1900008859.hg.1                | AC008746.5                                                                           |
| TC1400008003.hg.1                | RP11-529H20.3                                                                        |
| TCUn_GL000219v100006432.<br>hg.1 | AL592183.2                                                                           |
| TC0700009698.hg.1                | RP4-548D19.3                                                                         |
| TC0500007271.hg.1                |                                                                                      |
| TC0600007746.hg.1                | CYCSP55                                                                              |
| TC1500007559.hg.1                | swastaw                                                                              |
| TC0300010389.hg.1                | ferdeybo                                                                             |
| TC0300007175.hg.1                | HNRNPA1P22                                                                           |
| TC0200013244.hg.1                | pyklo                                                                                |
| TC0800009010.hg.1                |                                                                                      |
| TC1100010728.hg.1                | RP11-390K5.1                                                                         |
| TC0100012899.hg.1                | RNU5E-4P                                                                             |
| TC0500011248.hg.1                | kasterbu                                                                             |
| TC0400012429.hg.1                | laswarbu                                                                             |
| TC0900010616.hg.1                | zarploybu                                                                            |
| TC0600012655.hg.1                | PNISR                                                                                |
| TC0300012446.hg.1                | choyboybu                                                                            |
| TC1100007876.hg.1                | TMEM179B; MIR6748                                                                    |
| TC2000009014.hg.1                | NDRG3                                                                                |
| TC0100014247.hg.1                | HSPB11                                                                               |
| TC0600008828.hg.1                | AL589947.1                                                                           |
| TC0500006669.hg.1                | gleyflu                                                                              |
| TC0700012011.hg.1                | ACTL6B                                                                               |
| TC0800012461.hg.1                | RP11-255B23.1                                                                        |
| TC0X00009115.hg.1                |                                                                                      |
| TC1300008823.hg.1                | RCN1P2                                                                               |

|                              |                             |
|------------------------------|-----------------------------|
| TC0400011538.hg.1            | PAPSS1                      |
| TC0900007413.hg.1            |                             |
| TC1500008106.hg.1            | RP11-382A20.7               |
| TC0800006566.hg.1            | AGPAT5                      |
| TC1000007864.hg.1            | RP11-119F7.5                |
| TC1100008980.hg.1            | slarlawby                   |
| TC0800007110.hg.1            | EPHX2                       |
| TC0900010282.hg.1            | FAM95B1                     |
| TC1400010394.hg.1            | CDCA4                       |
| TC1600007896.hg.1            | sterglu                     |
| TC0200015731.hg.1            | yonimo                      |
| TC0100009754.hg.1            | LOC101928979; RP11-458D21.1 |
| TCUn_KI270742v100006441.hg.1 |                             |
| TC1700011208.hg.1            | TRIM25; MIR3614             |
| TC1700010133.hg.1            |                             |
| TSUnmapped00000702.hg.1      | ULK4P2                      |
| TC0900006499.hg.1            |                             |
| TC0300008704.hg.1            | AC023593.1                  |
| TC1900009715.hg.1            |                             |
| TC1900010139.hg.1            | neytawbu                    |
| TC0500009714.hg.1            | kosterby                    |
| TC0700012968.hg.1            | PDIA4                       |
| TC1600009746.hg.1            | PALB2                       |
| TC0400010611.hg.1            | RP11-121C2.2                |
| TC0500013191.hg.1            | NSA2                        |
| TC0300010667.hg.1            | RP11-627J17.1               |
| TC1200009210.hg.1            | RP11-324E6.10               |
| TC1700007777.hg.1            | THRA                        |
| TC0600013677.hg.1            |                             |
| TC1600009348.hg.1            | RP11-297M9.1                |
| TC0100018540.hg.1            | ACBD6                       |
| TC2200009328.hg.1            | HPS4                        |
| TC0700011296.hg.1            |                             |
| TC1000009276.hg.1            | DOCK1                       |
| TC1400007776.hg.1            | AC008045.1                  |
| TC0100009956.hg.1            | RNY4P25                     |
| TC1200007437.hg.1            |                             |
| TC0600010059.hg.1            | nuflawby                    |
| TC0100011368.hg.1            | skeyzerbo                   |
| TC0500007047.hg.1            | Y_RNA                       |
| TC1300006971.hg.1            |                             |
| TC0300012764.hg.1            | HLTF                        |

|                              |                                         |
|------------------------------|-----------------------------------------|
| TC2100007538.hg.1            | CR392039.2                              |
| TC0100010706.hg.1            |                                         |
| TC2200007893.hg.1            |                                         |
| TC2200008266.hg.1            |                                         |
| TC0500011878.hg.1            | slusnorbu                               |
| TC0800011605.hg.1            | swola                                   |
| TC0X00008864.hg.1            | koymy                                   |
| TC1200012634.hg.1            | KRT7                                    |
| TC2000007363.hg.1            | sloyroybu                               |
| TC0X00006731.hg.1            | dermoy                                  |
| TC1900009852.hg.1            | ILVBL                                   |
| TC1200010372.hg.1            |                                         |
| TC0100010385.hg.1            |                                         |
| TC1700007290.hg.1            | RP11-744K17.3                           |
| TC0400011957.hg.1            | MAML3                                   |
| TC0500007694.hg.1            | GTF2H2; GTF2H2B                         |
| TC0400009026.hg.1            | AC099339.1                              |
| TC1200012807.hg.1            | STAC3                                   |
| TC0700013284.hg.1            | dawbley                                 |
| TC0900009882.hg.1            | DCAF12                                  |
| TC0800006882.hg.1            | boyblu                                  |
| TC0X00007655.hg.1            | SLC16A2                                 |
| TC2200008134.hg.1            | ZNF280B                                 |
| TC0X00010534.hg.1            |                                         |
| TC0300010560.hg.1            | AC099535.1                              |
| TC1200012206.hg.1            | KDM2B                                   |
| TC1700010270.hg.1            | RP11-354P11.3                           |
| TC0800008322.hg.1            | gulu                                    |
| TC1600007569.hg.1            | RP11-1166P10.7                          |
| TC1100006559.hg.1            |                                         |
| TC0800010759.hg.1            | duly                                    |
| TC1900010479.hg.1            | DMKN                                    |
| TC0300009186.hg.1            |                                         |
| TC0400011574.hg.1            |                                         |
| TC1200007986.hg.1            | snawfler                                |
| TC0300006984.hg.1            |                                         |
| TC1200007345.hg.1            |                                         |
| TC0600013707.hg.1            |                                         |
| TC0500007894.hg.1            | vystawby                                |
| TCUn_KI270742v100006440.hg.1 | RP11-423O2.5; TCONS_I2_00002625; taseyo |
| TC0700010459.hg.1            | KLHL7-AS1                               |
| TC0800009749.hg.1            | borblu                                  |

|                   |                             |
|-------------------|-----------------------------|
| TC0500013121.hg.1 |                             |
| TC0700012016.hg.1 | EPHB4                       |
| TC1800007245.hg.1 |                             |
| TC0200015080.hg.1 | PRKRA                       |
| TC1400008517.hg.1 |                             |
| TC2200006440.hg.1 |                             |
| TC0100015506.hg.1 | HIST2H2BA                   |
| TC1900011860.hg.1 | DNMT1                       |
| TC1000007358.hg.1 | CHEK2P5                     |
| TC0300010989.hg.1 | CSPG5                       |
| TC0400012847.hg.1 |                             |
| TC0300009119.hg.1 | AGTR1                       |
| TC0200009275.hg.1 |                             |
| TC0500011077.hg.1 | RP11-1174L13.2              |
| TC0100006819.hg.1 | APITD1-CORT; CORT; APITD1   |
| TC0100015502.hg.1 | U1                          |
| TC0100015538.hg.1 | RNU1-143P                   |
| TC0100015693.hg.1 | RNU1-68P                    |
| TC0900007472.hg.1 | ANKRD20A1                   |
| TC1700010947.hg.1 | CTD-2026D20.2; LOC100272146 |
| TC1700012316.hg.1 | ANAPC11                     |
| TC1200008006.hg.1 | MIR548C                     |
| TC0900010102.hg.1 | AC129778.3; BMS1P14         |
| TC0100011789.hg.1 |                             |
| TC1000007770.hg.1 |                             |
| TC0100012391.hg.1 | RNU6-1100P                  |
| TC0100012403.hg.1 | U6                          |
| TC0100017433.hg.1 | RNU6-791P                   |
| TC0400011710.hg.1 | RNU6-1217P                  |
| TC1100009647.hg.1 | RNU6-447P                   |
| TC1700009306.hg.1 | U6                          |
| TC1900009072.hg.1 | RNU6-1076P                  |
| TC0100017975.hg.1 | klawlawbo                   |
| TC0200013616.hg.1 | AFF3                        |
| TC0600013396.hg.1 | AL033522.1                  |
| TC0700009329.hg.1 | TTC26                       |
| TC0X00007119.hg.1 | JADE3                       |
| TC1100006906.hg.1 | FAR1                        |
| TC0400010527.hg.1 | soygar                      |
| TC0800008595.hg.1 | lorskerbu                   |
| TC0400007938.hg.1 | BMP2K                       |
| TC0700008149.hg.1 | PHTF2                       |
| TC1300008350.hg.1 |                             |

|                                   |                      |
|-----------------------------------|----------------------|
| TC0600012359.hg.1                 | lorjo                |
| TC1400009685.hg.1                 | sworpo               |
| TC0100014478.hg.1                 | beyboy; RP5-1044H5.1 |
| TC1100010096.hg.1                 | snerglor             |
| TC0100011527.hg.1                 | NENF                 |
| TC0200010480.hg.1                 | NOP58                |
| TC0400009422.hg.1                 | nukame               |
| TC0700011318.hg.1                 | ERV3-1; ZNF117       |
| TC0700010989.hg.1                 | TNS3                 |
| TC0500011497.hg.1                 | GLRX                 |
| TC1200012626.hg.1                 | PRPF40B              |
| TC1500007634.hg.1                 | snarstee             |
| TC0700012081.hg.1                 | RP11-163E9.1         |
| TC17_GL000205v2_random006432.hg.1 | AC011841.4           |
| TC1200007173.hg.1                 | RP11-425D17.2        |
| TC0200015251.hg.1                 | AC092614.1           |
| TC0700013359.hg.1                 |                      |
| TC0X00009603.hg.1                 | SSX9                 |
| TC0200007081.hg.1                 | MIR4263              |
| TC1600008360.hg.1                 |                      |
| TC0700007393.hg.1                 | boyblaw              |
| TC0100009884.hg.1                 | karboy               |
| TC0200015729.hg.1                 | USP37                |
| TC0100017851.hg.1                 | korlawbo             |
| TC0700007865.hg.1                 |                      |
| TC1600008242.hg.1                 | mawzu                |
| TC0500012947.hg.1                 | GPRIN1               |
| TC1100012702.hg.1                 | TMEM218              |
| TC0100017974.hg.1                 | CEP170               |
| TC1100010688.hg.1                 | PHF21A               |
| TC1400007257.hg.1                 | AL163952.1           |
| TC1700009632.hg.1                 | RP11-542C16.1        |
| TC0700007061.hg.1                 | WIPF3                |
| TC1600008223.hg.1                 | Y_RNA                |
| TC1100011532.hg.1                 | AP002495.1           |
| TC1800006597.hg.1                 | shakler              |
| TC0900011577.hg.1                 | SNORA65              |
| TC0200016768.hg.1                 | PECR                 |
| TC1200012083.hg.1                 | FBXO21               |
| TC0400008852.hg.1                 | niseme               |
| TC1100009775.hg.1                 |                      |
| TC0600011870.hg.1                 | DNPH1                |

|                              |                  |
|------------------------------|------------------|
| TC2200006540.hg.1            | USP18            |
| TC0700011305.hg.1            | BNIP3P11         |
| TC0100011030.hg.1            | lawkloy          |
| TC0700011309.hg.1            | forblo           |
| TC0100018480.hg.1            | NBPF14           |
| TC0200016505.hg.1            | CCDC138          |
| TC0700010561.hg.1            | HOXA5            |
| TC0600006434.hg.1            |                  |
| TC1100010373.hg.1            |                  |
| TC0500012839.hg.1            | CTB-79E8.2       |
| TC0100009788.hg.1            | BCL9             |
| TC1500007926.hg.1            | RCN2             |
| TC0900010420.hg.1            | AL449083.1       |
| TC2200008620.hg.1            | IFT27            |
| TC0800007548.hg.1            | zeewyby          |
| TC0100014655.hg.1            |                  |
| TC1400010276.hg.1            | kladuby          |
| TC1600007570.hg.1            |                  |
| TC1900009366.hg.1            | AC005523.2       |
| TC1600009887.hg.1            | ATP2A1-AS1       |
| TC1500009515.hg.1            | skersaw          |
| TCUn_KI270741v100006435.hg.1 | AUXG01000518.1   |
| TC0X00008511.hg.1            |                  |
| TC1200008666.hg.1            | HSP90B1; MIR3652 |
| TC1900008328.hg.1            | PPM1N            |
| TC1100008760.hg.1            |                  |
| TC0500007779.hg.1            |                  |
| TC1900007511.hg.1            | ZNF714; VN1R81P  |
| TC1700007792.hg.1            | slorslu          |
| TC1900007808.hg.1            |                  |
| TC0700012747.hg.1            | AC008155.1       |
| TC0300011596.hg.1            |                  |
| TC0200007163.hg.1            |                  |
| TC0300013165.hg.1            |                  |
| TC0700013176.hg.1            | seybloyby        |
| TC0700011153.hg.1            |                  |
| TC0800012202.hg.1            | BOP1; MIR7112    |
| TC0100008830.hg.1            |                  |
| TC1200010923.hg.1            |                  |
| TC0400010546.hg.1            |                  |
| TC1900011944.hg.1            | FBXO17           |
| TC1600007187.hg.1            | lysny            |



|                   |                   |
|-------------------|-------------------|
| TC1500008862.hg.1 | U8                |
| TC0200007261.hg.1 | QPCT              |
| TC1500009520.hg.1 | RP11-48G14.2      |
| TC0100008154.hg.1 | rawmybo           |
| TC0600014374.hg.1 | PHF10             |
| TC0600013425.hg.1 | ADAT2             |
| TC0900009902.hg.1 | ENHO              |
| TC1700007914.hg.1 | VPS25             |
| TC0X00009377.hg.1 |                   |
| TC0500013277.hg.1 | MAML1             |
| TC1400007915.hg.1 | TTC8              |
| TC1700007781.hg.1 | rawer             |
| TC0400012768.hg.1 | FAM200B           |
| TC1500007343.hg.1 | LINC00926         |
| TC0600012517.hg.1 |                   |
| TC0600007042.hg.1 | tablor; werglorbu |
| TC0900010245.hg.1 |                   |
| TC0100013404.hg.1 | blyworbo          |
| TC1200007033.hg.1 |                   |
| TC0100010418.hg.1 | starloybu         |
| TC0400012294.hg.1 | AC005150.3        |
| TC0700011807.hg.1 | AC005024.1        |
| TC0800008665.hg.1 | MIR548AZ          |
| TC0600008370.hg.1 |                   |
| TC1600007205.hg.1 | fusny             |
| TC0200012415.hg.1 |                   |
| TC1600006784.hg.1 |                   |
| TC2200008942.hg.1 |                   |
| TC0600013688.hg.1 |                   |
| TC0700007413.hg.1 | Metazoa_SRP       |
| TC0800008163.hg.1 | worborby          |
| TC0100009308.hg.1 | mureha            |
| TC0100015984.hg.1 | UBQLN4            |
| TC1200012727.hg.1 | RP11-575F12.3     |
| TC0300007657.hg.1 | C3orf14           |
| TC1500006683.hg.1 | APBA2             |
| TC1200009843.hg.1 | M6PR              |
| TC1200011791.hg.1 | CKAP4             |
| TC0200015230.hg.1 | RP11-647K16.1     |
| TC1900010454.hg.1 |                   |
| TC1200008045.hg.1 |                   |
| TC1700007894.hg.1 | PTP4A2P1          |
| TC0900007332.hg.1 | RP11-374M1.11     |

|                   |                 |
|-------------------|-----------------|
| TC0900011339.hg.1 | PAPPA-AS1       |
| TC1200010734.hg.1 | RP1-288H2.2     |
| TC1200009693.hg.1 |                 |
| TC2200008974.hg.1 | SMC1B           |
| TC1800006800.hg.1 | CYP4F35P        |
| TC1200008817.hg.1 | starzeeby       |
| TC0100013193.hg.1 | HP1BP3          |
| TC1200009192.hg.1 | BCL7A           |
| TC1700010606.hg.1 |                 |
| TC1800008967.hg.1 | RP11-106E15.1   |
| TC2000007834.hg.1 | AL133232.1      |
| TC1800007302.hg.1 |                 |
| TC0500011748.hg.1 | CCDC112         |
| TC1000007913.hg.1 | H2AFY2          |
| TC1200012188.hg.1 | HNF1A-AS1       |
| TC2000006514.hg.1 |                 |
| TC0900010237.hg.1 |                 |
| TC0600010624.hg.1 |                 |
| TC1700010040.hg.1 | RP11-78O7.2     |
| TC1600006831.hg.1 | bawru           |
| TC0500009076.hg.1 | SLC26A2         |
| TC0500012669.hg.1 | AC022120.1      |
| TC0400007169.hg.1 | PCDH7           |
| TC0X00010605.hg.1 |                 |
| TC0100018539.hg.1 | LHX4-AS1; ACBD6 |
| TC0100016301.hg.1 |                 |
| TC1700008251.hg.1 | EME1            |
| TC1100008847.hg.1 | CEP57           |
| TC0900011663.hg.1 | rogar           |
| TC0200013494.hg.1 | AC009237.11     |
| TC0500006658.hg.1 | RP11-404K5.1    |
| TC0200011974.hg.1 | SF3B6           |
| TC0500012390.hg.1 | JAKMIP2         |
| TC1600010557.hg.1 | RP11-744D14.1   |
| TC0800010158.hg.1 | PLPP5           |
| TC0600011244.hg.1 |                 |
| TC0X00010972.hg.1 |                 |
| TC1400007951.hg.1 | shopar          |
| TC0X00009605.hg.1 | RP11-344N17.15  |
| TC0400010172.hg.1 | berko           |
| TC0300011557.hg.1 | gorreybu        |
| TC0900007522.hg.1 |                 |
| TC0200009546.hg.1 | florgybo        |

|                   |               |
|-------------------|---------------|
| TC1200008846.hg.1 | zycho         |
| TC0700006495.hg.1 |               |
| TC0600014356.hg.1 | RP11-350J20.5 |
| TC0300010037.hg.1 | mawsweyby     |
| TC0900010211.hg.1 | seyskybu      |
| TC1100006989.hg.1 |               |
| TC0400008360.hg.1 |               |
| TC2200006545.hg.1 | chadoy        |
| TC0600008448.hg.1 | serflaby      |
| TC0200009921.hg.1 |               |
| TC0X00008915.hg.1 | pleefy        |
| TC0Y00006891.hg.1 | stobar        |
| TC1300009124.hg.1 | AL353765.1    |
| TC0600013531.hg.1 | NUP43         |
| TC1700011286.hg.1 | CTD-2510F5.4  |
| TC2200007501.hg.1 | sheetey       |
| TC0100011330.hg.1 | SNRPGP10      |
| TC1600010099.hg.1 |               |
| TC1500007153.hg.1 |               |
| TC0X00011366.hg.1 | RP11-344N17.3 |
| TC0300012897.hg.1 | SSR3          |
| TC1800008360.hg.1 | RP11-430E17.1 |
| TC0800010360.hg.1 | PRKDC         |
| TC0400009329.hg.1 |               |
| TC0100007062.hg.1 | sporawbo      |
| TC2200009012.hg.1 |               |
| TC0400010580.hg.1 | GNPDA2        |
| TC0400011354.hg.1 | smoswuby      |
| TC0500013188.hg.1 | RP11-389C8.3  |
| TC0700006717.hg.1 | chorshybu     |
| TC0400010659.hg.1 | neespeybu     |
| TC2200008375.hg.1 | CTA-292E10.7  |
| TC0900010105.hg.1 | FP325318.1    |
| TC0900010227.hg.1 | FO203515.1    |
| TC0900010259.hg.1 | AL359955.1    |
| TC0100010027.hg.1 |               |
| TC0200008220.hg.1 | AC106874.2    |
| TC0100012771.hg.1 | sweemoy       |
| TC0600008617.hg.1 | RP11-177G23.2 |
| TC0200016131.hg.1 | fadoybu       |
| TC2200006460.hg.1 | wertee        |
| TC1100008991.hg.1 | DDX10         |
| TC0400007048.hg.1 | nerfloy       |

|                   |                   |
|-------------------|-------------------|
| TC0400010661.hg.1 | sarfleeby         |
| TC0800012330.hg.1 | NDUFAF6           |
| TC0500008121.hg.1 | ARSK              |
| TC0100018288.hg.1 | PLEKHO1           |
| TC1100011719.hg.1 | CLNS1A            |
| TC1900010518.hg.1 |                   |
| TC1200010900.hg.1 | SMARCC2           |
| TC2100008396.hg.1 |                   |
| TC0100006485.hg.1 | toyrorbu          |
| TC1100010451.hg.1 | IMMP1L            |
| TC1600009920.hg.1 |                   |
| TC0600012358.hg.1 | PHIP              |
| TC2200006839.hg.1 |                   |
| TC2000006726.hg.1 | PA2G4P2           |
| TC0400008189.hg.1 | sasime            |
| TC0X00008740.hg.1 |                   |
| TC0900009337.hg.1 | FO082796.1        |
| TC2200007632.hg.1 | sporsubo          |
| TC1300006785.hg.1 | B3GLCT            |
| TC0Y00007082.hg.1 | CYCSP46           |
| TC0600012080.hg.1 |                   |
| TC1900009877.hg.1 |                   |
| TC0300007531.hg.1 | RPS15P5           |
| TC2200007134.hg.1 | RFPL3-AS1_2       |
| TC0800006978.hg.1 | POLR3D            |
| TC0400007485.hg.1 | noteme; soyfleeby |
| TC1700008695.hg.1 | MIR548AA2         |
| TC1900006633.hg.1 | AC005514.2        |
| TC0200006954.hg.1 | gleejarbo         |
| TC1400007942.hg.1 | TDP1              |
| TC0300011798.hg.1 |                   |
| TC0900007241.hg.1 | fleywerby         |
| TC0X00010176.hg.1 |                   |
| TC0200014341.hg.1 | AC093787.1        |
| TC1700012231.hg.1 | TMEM98            |
| TC1200006643.hg.1 | PTMS              |
| TC2200008167.hg.1 |                   |
| TC0300010309.hg.1 | RP11-767C1.2      |
| TC0300008782.hg.1 | IFT122            |
| TC0300012029.hg.1 | NAA50             |
| TC1200006670.hg.1 | CLSTN3            |
| TC0400011381.hg.1 | feysnoby          |
| TC1000008134.hg.1 |                   |

|                         |                      |
|-------------------------|----------------------|
| TC0800007057.hg.1       | DOCK5                |
| TC0100015572.hg.1       | SRGAP2B              |
| TC0700012118.hg.1       | RP11-401L13.7        |
| TC1500010308.hg.1       | perkuby              |
| TC1200007054.hg.1       | choshey              |
| TC1300009899.hg.1       | sucha                |
| TC0900007337.hg.1       |                      |
| TC1200008325.hg.1       | ferjuby              |
| TC0Y00007121.hg.1       | flarby               |
| TC0100010189.hg.1       |                      |
| TC1200012186.hg.1       | steybleebu           |
| TC0800011367.hg.1       | chawskeebu           |
| TC1200009259.hg.1       | boygawby             |
| TC1800008293.hg.1       | AC010754.1           |
| TC1900008462.hg.1       | CTC-453G23.5         |
| TC2000008940.hg.1       | PIGU                 |
| TC1700012046.hg.1       |                      |
| TC1700007219.hg.1       | damy                 |
| TC1200012050.hg.1       | rurire               |
| TC0500011690.hg.1       | flerswobu            |
| TC1500009867.hg.1       | MIR4312              |
| TC2200006593.hg.1       | rimara               |
| TC1300008884.hg.1       |                      |
| TC1800008655.hg.1       | DYM                  |
| TC0700013421.hg.1       | ZNF789               |
| TC0100013588.hg.1       | PTP4A2               |
| TSUnmapped00000659.hg.1 | ULK4P3               |
| TC1100009285.hg.1       | TMEM136              |
| TC0200006978.hg.1       | RP11-443B20.1        |
| TC1300008773.hg.1       | yomori               |
| TC0700011490.hg.1       | RNU6-1080P           |
| TC1100012510.hg.1       | HYOU1                |
| TC1300010015.hg.1       | ANKRD20A9P; RNU6-55P |
| TC0800009654.hg.1       |                      |
| TC0X00009077.hg.1       |                      |
| TC1200008440.hg.1       | pono                 |
| TC1700011742.hg.1       | blanu                |
| TC0300011293.hg.1       | pleenabo             |
| TC0X00009372.hg.1       | BX842568.2           |
| TC0800011064.hg.1       | CALB1                |
| TC1200009860.hg.1       | RP11-22B23.2         |
| TC1700009595.hg.1       |                      |
| TC0600008257.hg.1       | TRAM2-AS1            |

|                         |                            |
|-------------------------|----------------------------|
| TC0800007316.hg.1       | EIF4EBP1                   |
| TC0200015739.hg.1       | ZNF142                     |
| TC0100007850.hg.1       | SNORA63                    |
| TC2200006614.hg.1       | GP1BB; SEPT5               |
| TC0X00006770.hg.1       | SMS                        |
| TC1200008627.hg.1       | jeyjawby                   |
| TC0300010035.hg.1       | SENP5                      |
| TC1500009904.hg.1       | TLE3                       |
| TC1600009532.hg.1       | zerpy                      |
| TC0500010936.hg.1       | sluploby                   |
| TC0100017034.hg.1       |                            |
| TC1000011690.hg.1       | ARL3                       |
| TC0100015786.hg.1       | POGZ                       |
| TC1500010844.hg.1       | LOC100288637               |
| TC0100010488.hg.1       | DUTP6                      |
| TC2200007505.hg.1       | 3-Sep                      |
| TC1100007466.hg.1       | LRP4-AS1                   |
| TC1600007208.hg.1       |                            |
| TC0700012408.hg.1       | AC004946.1                 |
| TC0300011461.hg.1       | worpybu                    |
| TC0500012961.hg.1       | fafley                     |
| TC2200008873.hg.1       | LINC01315                  |
| TC0700006980.hg.1       | CBX3                       |
| TC0100008804.hg.1       | fleymarbo                  |
| TC1500006727.hg.1       | U8                         |
| TSUnmapped00000566.hg.1 | AC254960.1                 |
| TC1400009879.hg.1       |                            |
| TC0900010312.hg.1       | FAM27AP1                   |
| TC1700012283.hg.1       | LUC7L3                     |
| TC0200009964.hg.1       | HAT1                       |
| TC0100009826.hg.1       | RNVU1-3                    |
| TC0100008625.hg.1       | PDE4B                      |
| TC1800008476.hg.1       | LOC101927809; RP11-49I11.1 |
| TC0700010624.hg.1       |                            |
| TC0200012079.hg.1       | smarkerbo                  |
| TC0600007599.hg.1       | PRRC2A                     |
| TC1400008007.hg.1       | CPSF2                      |
| TC0X00006810.hg.1       |                            |
| TC1000010931.hg.1       |                            |
| TC1900011827.hg.1       | ZNF8                       |
| TC1200008848.hg.1       | TCTN1                      |
| TC1200012302.hg.1       |                            |
| TC0500007581.hg.1       | CTD-2049O17.1              |

|                                    |                            |
|------------------------------------|----------------------------|
| TC1900006764.hg.1                  | SAFB                       |
| TC0400012175.hg.1                  | AC020703.2                 |
| TC1200006701.hg.1                  | NECAP1                     |
| TC0900009939.hg.1                  |                            |
| TC0Y00006679.hg.1                  | cheybu                     |
| TC0100016016.hg.1                  | NES                        |
| TC1200011094.hg.1                  | MIR548Z                    |
| TC1600007433.hg.1                  | CTD-2574D22.2              |
| TC14_GL000194v1_random0006433.hg.1 | AC145212.3                 |
| TC1300008181.hg.1                  | CHAMP1                     |
| TC0700008294.hg.1                  | AC004969.1                 |
| TC0200012365.hg.1                  |                            |
| TC0200016024.hg.1                  |                            |
| TC1000008018.hg.1                  |                            |
| TC1300006850.hg.1                  | AL161891.1                 |
| TC2200009007.hg.1                  | statey                     |
| TC0100009944.hg.1                  | PIP5K1A                    |
| TC0300006998.hg.1                  |                            |
| TC1100007874.hg.1                  | POLR2G                     |
| TC0200010219.hg.1                  | FAM171B                    |
| TC1100008435.hg.1                  | RNF169                     |
| TC0100007503.hg.1                  | NPM1P39                    |
| TC2000008853.hg.1                  | fortar                     |
| TC0700013432.hg.1                  | LOC101927746; RP11-132A1.4 |
| TC0100007161.hg.1                  | RP4-657E11.10              |
| TC0500012172.hg.1                  | gawsweebu                  |
| TC1600008197.hg.1                  | RP11-71L14.4               |
| TC0200008232.hg.1                  |                            |
| TC1800008117.hg.1                  |                            |
| TC1100009177.hg.1                  | verklor                    |
| TC0200008973.hg.1                  | buswawby                   |
| TC0700012831.hg.1                  | worshyby                   |
| TC0100012421.hg.1                  | FAM41C                     |
| TC0100015924.hg.1                  |                            |
| TC0400007507.hg.1                  |                            |
| TC0200008537.hg.1                  | hutoyo                     |
| TC1700008822.hg.1                  | dersy                      |
| TC1100008540.hg.1                  | keygleebu                  |
| TC1700009812.hg.1                  | MIR548H3                   |
| TC0200007391.hg.1                  |                            |
| TC1900007993.hg.1                  | barcher                    |
| TC1900009961.hg.1                  | sterglaw                   |

|                   |                             |
|-------------------|-----------------------------|
| TC1900009808.hg.1 | ADGRL1                      |
| TC1300006811.hg.1 | PDS5B                       |
| TC1100007465.hg.1 | tasnoby                     |
| TC0400011740.hg.1 | AC093816.1                  |
| TC1500009535.hg.1 | seeklar                     |
| TC1400009881.hg.1 |                             |
| TC0100011284.hg.1 | RP11-74C13.4                |
| TC0100016454.hg.1 | chukerbo                    |
| TC0600008667.hg.1 | AL391416.1                  |
| TC1700009447.hg.1 | reyskey                     |
| TC0200013740.hg.1 | AC010884.2                  |
| TC1700008622.hg.1 | RP11-927P21.1               |
| TC0400007247.hg.1 | PTTG2                       |
| TC0600009851.hg.1 | MTHFD1L                     |
| TC2000008918.hg.1 | matar                       |
| TC1300007184.hg.1 |                             |
| TC1000007769.hg.1 |                             |
| TC0300010487.hg.1 | AC104183.1                  |
| TC0800008100.hg.1 | glozybu                     |
| TC0300007584.hg.1 | RP11-755B10.2; DENND6A-AS1  |
| TC2000007764.hg.1 | AL050316.1                  |
| TC0300008783.hg.1 | klaborbu                    |
| TC0200008131.hg.1 |                             |
| TC1300009195.hg.1 |                             |
| TC0200014300.hg.1 |                             |
| TC0500010465.hg.1 |                             |
| TC0100017069.hg.1 | LOC284578                   |
| TC0X00008596.hg.1 | CDR1; CDR1-AS               |
| TC1400007264.hg.1 | korcheybu                   |
| TC0900007302.hg.1 |                             |
| TC0900010535.hg.1 | AL354682.1                  |
| TC0300008358.hg.1 | RP11-553D4.2                |
| TC1100006827.hg.1 | meeflerbu                   |
| TC0400010603.hg.1 |                             |
| TC1100007128.hg.1 | RP11-587D21.1               |
| TC0600010351.hg.1 | XX-C2158C6.1; XX-C2158C12.2 |
| TC0100007635.hg.1 | sakemo                      |
| TC1900011604.hg.1 |                             |
| TC2000008857.hg.1 |                             |
| TC0700007910.hg.1 | larzoyby                    |
| TC0400012458.hg.1 | HPGD                        |
| TC0500010774.hg.1 | MIR5687                     |
| TC1200011245.hg.1 | PTPRB                       |



|                   |                        |
|-------------------|------------------------|
| TC0700010443.hg.1 | STEAP1B                |
| TC0700008292.hg.1 | STEAP1                 |
| TC0700008293.hg.1 | STEAP2                 |
| TC0200006630.hg.1 | koystawby              |
| TC2000007868.hg.1 |                        |
| TC0100011399.hg.1 |                        |
| TC1900009688.hg.1 |                        |
| TC2000009604.hg.1 | PMEP1                  |
| TC0600007812.hg.1 | SNORA40                |
| TC1000008646.hg.1 | OLMALINC               |
| TC0100017116.hg.1 | C1orf116               |
| TC0700007103.hg.1 | slawky                 |
| TC1800007850.hg.1 | COLEC12                |
| TC0900009905.hg.1 | CNTFR                  |
| TC0200016625.hg.1 |                        |
| TC0700008745.hg.1 | PRKAR2B                |
| TC0200009436.hg.1 | SNORA40                |
| TC1100012367.hg.1 | narna                  |
| TC1200009142.hg.1 | sheyjaby               |
| TC1100009106.hg.1 | weyjawby               |
| TC0X00009337.hg.1 |                        |
| TC1900011225.hg.1 | KLKP1                  |
| TC1200008667.hg.1 | HSP90B1                |
| TC1700010271.hg.1 | RP11-354P11.8; glerror |
| TC1200008009.hg.1 |                        |
| TC0200013023.hg.1 | keyjoybo               |
| TC0400012473.hg.1 | GPM6A                  |
| TC0600012274.hg.1 |                        |
| TC0700007132.hg.1 | FKBP9                  |
| TC1100007218.hg.1 | swortubo               |
| TC1200008167.hg.1 | RP11-785D18.3          |
| TC1100009108.hg.1 | galerby                |
| TC0500012588.hg.1 | HAVCR1                 |
| TC0600011587.hg.1 | doybloy                |
| TC0600011635.hg.1 | FKBP5                  |
| TC0300013072.hg.1 | shorjeebu              |
| TC0200013024.hg.1 | zawklar                |
| TC0900012136.hg.1 |                        |
| TC0200013631.hg.1 | flajybu                |
| TC1900010310.hg.1 |                        |
| TC0900007360.hg.1 |                        |
| TC0200013633.hg.1 | kleydey                |
| TC1200011313.hg.1 | NAP1L1                 |

|                   |                                          |
|-------------------|------------------------------------------|
| TC0300008528.hg.1 | bybeebu                                  |
| TC0100009148.hg.1 | swerplo                                  |
| TC1000012497.hg.1 | BORCS7-ASMT                              |
| TC1600007882.hg.1 | LOC102723373; RP11-44F14.2; RP11-44F14.8 |
| TC0400009503.hg.1 | PRIMPOL                                  |
| TC1200010531.hg.1 | SLC38A4                                  |
| TC1600011574.hg.1 | GINS2                                    |
| TC1400008556.hg.1 | CTD-2311B13.7; LINC01297                 |
| TC0200009659.hg.1 | FABP5P10                                 |
| TC0100010515.hg.1 | sloymabu                                 |
| TC1900008608.hg.1 | KLK2                                     |
| TC0600011637.hg.1 | doykleebu                                |
| TC0200013843.hg.1 | flokubo                                  |
| TC0600007813.hg.1 |                                          |
| TC0X00007053.hg.1 | MAOA                                     |
| TC0400008483.hg.1 | UGT8                                     |
| TC0300008561.hg.1 | PARP14                                   |
| TC1800006440.hg.1 | RP11-720L2.4                             |
| TC2100006574.hg.1 |                                          |
| TC0900007800.hg.1 | CDC20P1                                  |
| TC0300010046.hg.1 | MFI2-AS1                                 |
| TC0X00008790.hg.1 | DUSP9                                    |
| TC2000007871.hg.1 | suraw                                    |
| TC1100008948.hg.1 | GRIA4                                    |
| TC0700006625.hg.1 |                                          |
| TC0400011448.hg.1 | tawsweebu                                |
| TC1900007495.hg.1 | AC010329.1                               |
| TC1000011557.hg.1 | LOC100270710                             |
| TC0600010572.hg.1 | TUBB2B                                   |
| TC0700011734.hg.1 |                                          |
| TC0600009755.hg.1 | skyvoby                                  |
| TC0400006645.hg.1 | STX18-AS1                                |
| TC0900007359.hg.1 | LINC01410                                |
| TC0X00007936.hg.1 | CENPI                                    |
| TC2200007841.hg.1 | CU463998.3                               |
| TC0900009867.hg.1 |                                          |
| TC0500012817.hg.1 | sperskeeby                               |
| TC2100007464.hg.1 |                                          |
| TC0900012127.hg.1 | RP11-146D12.2                            |
| TC0700008361.hg.1 | peekar                                   |
| TC1100007510.hg.1 | keeny                                    |
| TC0100015935.hg.1 |                                          |
| TC0900009569.hg.1 | NFIB                                     |

|                   |               |
|-------------------|---------------|
| TC1100008149.hg.1 | wostuby       |
| TC1900011223.hg.1 | KLK1          |
| TC0500010865.hg.1 | DEPDC1B       |
| TC1000010405.hg.1 | LOC441666     |
| TC0400008252.hg.1 | spustawbu     |
| TC1200011312.hg.1 | lerchar       |
| TC0600011130.hg.1 | HIST1H4C      |
| TC0700007776.hg.1 | BNIP3P42      |
| TC0400009375.hg.1 | RP11-598O12.1 |
| TC0700011151.hg.1 | FKBP9P1       |
| TC0200016445.hg.1 | MSH6          |
| TC0200008200.hg.1 | LOC1720       |
| TC1200009086.hg.1 | RN7SL508P     |
| TC0700013363.hg.1 | GBAS          |
| TC1300007193.hg.1 |               |
| TC0800011071.hg.1 | TMEM64        |
| TC0900011038.hg.1 | GRIN3A        |
| TC1200010712.hg.1 | RP11-923I11.3 |
| TC2200008036.hg.1 | USP41         |
| TC1700006622.hg.1 | kergler       |
| TC0900006438.hg.1 | DOCK8         |
| TC0X00007495.hg.1 | boydy         |
| TC0400011449.hg.1 | nago          |
| TC0700008969.hg.1 | teesnabu      |
| TC0100011188.hg.1 | snokorbo      |
| TC0300012671.hg.1 | snawdobu      |
| TC1200010805.hg.1 | gloyno        |
| TC1200008622.hg.1 | notch         |
| TC0100018432.hg.1 | SFPQ          |
| TC0100009778.hg.1 | snorarbu      |
| TC0400008685.hg.1 | vystorbu      |
| TC1600006657.hg.1 |               |
| TC0900007242.hg.1 | blymar        |
| TC0900012134.hg.1 | CR848007.2    |
| TC1100012285.hg.1 | COLCA1        |
| TC0200015266.hg.1 | TMEFF2        |
| TC0200012559.hg.1 | NRXN1         |
| TC0400008370.hg.1 |               |
| TC0800010045.hg.1 | TEX15         |
| TC1800008750.hg.1 | TCF4          |
| TC0600007207.hg.1 | GMNN          |
| TC0500010528.hg.1 | AC074129.1    |
| TC0X00007318.hg.1 |               |

|                   |               |
|-------------------|---------------|
| TC0200013431.hg.1 | kerplar       |
| TC1200012159.hg.1 | MSI1          |
| TC0200014244.hg.1 | FAR2P1        |
| TC0600010123.hg.1 | stoyflawby    |
| TC0600009436.hg.1 | L3MBTL3       |
| TC1200007041.hg.1 | RP11-424C20.2 |
| TC0100008350.hg.1 | smuzarbo      |
| TC0900007634.hg.1 |               |
| TC1900007497.hg.1 | flarchoy      |
| TC0400007474.hg.1 | AC118282.3    |
| TC0400006908.hg.1 |               |
| TC0600007282.hg.1 | HIST1H2BF     |
| TC0600009143.hg.1 | SLC16A10      |
| TC0400009746.hg.1 | SLBP          |
| TC0700009914.hg.1 | foyzeyby      |
| TC2200006890.hg.1 | joyfer        |
| TC0600011636.hg.1 | kyspabu       |
| TC0200008859.hg.1 | jawgorbu      |
| TC0400011445.hg.1 | MIR8066       |
| TC0400012396.hg.1 | AADAT         |
| TC0100014206.hg.1 | chaplo        |
| TC0700006916.hg.1 | AC021876.4    |
| TC1600007558.hg.1 |               |
| TC0400007480.hg.1 | MTCO3P39      |
| TC1500007064.hg.1 | shorfarby     |
| TC0100013146.hg.1 | zeyplu        |
| TC0100009149.hg.1 | PTBP2         |
| TC1300006628.hg.1 | SLC25A15P3    |
| TC0900007361.hg.1 |               |
| TC0700008131.hg.1 | poysmorbu     |
| TC2100008543.hg.1 | ANKRD20A11P   |
| TC0300006848.hg.1 | LOC101927854  |
| TC1400006482.hg.1 | zeecharbu     |
| TC1100010254.hg.1 | SAAL1         |
| TC0400009614.hg.1 |               |
| TC0900010006.hg.1 | veesarby      |
| TC0100013852.hg.1 | AL391730.2    |
| TC0X00007222.hg.1 | PLP2          |
| TC0300012968.hg.1 |               |
| TC1600008212.hg.1 | glusmer       |
| TC0100015569.hg.1 | CH17-125A10.2 |
| TC0700008811.hg.1 | voysmoybu     |
| TC0200015548.hg.1 | METTL21A      |

|                         |                 |
|-------------------------|-----------------|
| TC0400010477.hg.1       | skaswyby        |
| TC2200007635.hg.1       | watara          |
| TC0700008262.hg.1       |                 |
| TC1600009522.hg.1       |                 |
| TC0200008634.hg.1       | typobo          |
| TC0500007729.hg.1       | MCCC2           |
| TC0100010887.hg.1       | C1orf21         |
| TC2200006997.hg.1       | lyfo            |
| TC0200015650.hg.1       | FN1             |
| TC1200011702.hg.1       |                 |
| TC0400011532.hg.1       | AC093680.1      |
| TC1300008373.hg.1       |                 |
| TC0100017494.hg.1       | yokoyo          |
| TC2100007525.hg.1       |                 |
| TC1200011723.hg.1       | sygleeby        |
| TC1100009448.hg.1       |                 |
| TC0300011013.hg.1       |                 |
| TC1200009087.hg.1       | monumi          |
| TC0100017232.hg.1       |                 |
| TC0100016571.hg.1       | RP11-52118.1    |
| TC0200015240.hg.1       |                 |
| TC0900006917.hg.1       | RBMXP2          |
| TC2000006553.hg.1       | AL109805.1      |
| TC0400010668.hg.1       | RP11-1281K21.10 |
| TC0700013389.hg.1       | STAG3L1         |
| TC0600008127.hg.1       | SLC29A1         |
| TC1600007451.hg.1       | RP11-347C12.9   |
| TC1100012524.hg.1       |                 |
| TC1100007371.hg.1       | snoymee         |
| TC1200012451.hg.1       | STX2            |
| TC1300008942.hg.1       | swowarby        |
| TC1000008961.hg.1       | NHLRC2          |
| TC0100012469.hg.1       | MXRA8           |
| TC0700012479.hg.1       | POT1            |
| TC0100015742.hg.1       | SNORA40         |
| TC0800007536.hg.1       | geyfoyby        |
| TC1800006442.hg.1       |                 |
| TC0300007692.hg.1       |                 |
| TC1300008207.hg.1       | USP24P1         |
| TC1500006731.hg.1       | RP11-932O9.10   |
| TSUnmapped00000694.hg.1 | RP11-932O9.10   |
| TC2200007207.hg.1       |                 |
| TC0700008665.hg.1       |                 |

|                         |                                                      |
|-------------------------|------------------------------------------------------|
| TC0400008295.hg.1       | peego                                                |
| TC0500011924.hg.1       | ALDH7A1                                              |
| TC2000007299.hg.1       | florroybu                                            |
| TC1400009351.hg.1       | SIX1                                                 |
| TC0400008263.hg.1       |                                                      |
| TC0600014111.hg.1       | SYNGAP1; MIR5004                                     |
| TC1700012337.hg.1       | P2RX5                                                |
| TC0400007490.hg.1       | SNX18P25                                             |
| TC0400012454.hg.1       | swuflor                                              |
| TC0100013960.hg.1       | RP11-570P14.1                                        |
| TC0400011452.hg.1       | nugo                                                 |
| TC0600012652.hg.1       | FAXC                                                 |
| TC0400007592.hg.1       | PAICS                                                |
| TC0200012442.hg.1       | AC067957.1                                           |
| TC0100016625.hg.1       | GLUL                                                 |
| TC0100009142.hg.1       | PTBP2                                                |
| TC1900011221.hg.1       | C19orf48; SNORD88B; SNORD88C                         |
| TC0200015624.hg.1       | zoyklu                                               |
| TC0500010496.hg.1       | stersleybu                                           |
| TC1600010057.hg.1       |                                                      |
| TC1800008232.hg.1       | josaw                                                |
| TC1400008724.hg.1       | starcharbu                                           |
| TC0200015431.hg.1       | TMEM237                                              |
| TC1600007732.hg.1       |                                                      |
| TC0X00006604.hg.1       |                                                      |
| TC0100013478.hg.1       |                                                      |
| TC0200012566.hg.1       | kloyklee                                             |
| TC0500006498.hg.1       |                                                      |
| TC2000006749.hg.1       |                                                      |
| TC1100009105.hg.1       | nerna                                                |
|                         | NOP56; SNORD57; SNORD56; SNORA51; SNORD110; SNORD86; |
| TC2000006518.hg.1       | MIR1292                                              |
| TC0200014834.hg.1       | STK39                                                |
| TC2000008192.hg.1       |                                                      |
| TC0700007860.hg.1       | blozorby                                             |
| TC0800010748.hg.1       | RP11-152C15.1                                        |
| TC1200008882.hg.1       | RP11-686G8.1                                         |
| TC0400011442.hg.1       | boyswoby                                             |
| TSUnmapped00000349.hg.1 | FBL                                                  |
| TC1800007570.hg.1       | CDH7                                                 |
| TC0600008209.hg.1       | CENPQ                                                |
| TC0100007479.hg.1       | vorybu                                               |
| TC0900009592.hg.1       | PSIP1                                                |

|                         |                    |
|-------------------------|--------------------|
| TC1700008479.hg.1       | korwey             |
| TC0700012760.hg.1       | ZC3HAV1L           |
| TC0100009870.hg.1       | HIST2H4B; HIST2H4A |
| TC0200007815.hg.1       | AC007365.2         |
| TC0600011377.hg.1       | NRM                |
| TC0100011512.hg.1       | DTL                |
| TC0800009970.hg.1       | PBK                |
| TC0200006677.hg.1       | RRM2               |
| TSUnmapped00000293.hg.1 | RCC2               |
| TC0600008630.hg.1       | TTK                |
| TC0500009281.hg.1       | PTTG1              |
| TC2000007503.hg.1       | UBE2C              |
| TC0900007863.hg.1       | CKS2               |
| TC1200009759.hg.1       | CDCA3              |
| TC1200010650.hg.1       | RACGAP1            |
| TC1700010618.hg.1       | TOP2A              |
| TC1700012285.hg.1       | PRR11              |
| TC1200008597.hg.1       | GAS2L3             |
| TC1100008913.hg.1       |                    |
| TC0700009145.hg.1       | MEST               |
| TC0100016831.hg.1       | ASPM               |
| TSUnmapped00000413.hg.1 | RP1-20B21.4        |
| TC1000007748.hg.1       | CDK1               |
| TC1100012121.hg.1       | TMEM123            |
| TC0100007110.hg.1       | RP1-20B21.4; kuplo |
| TC0X00007537.hg.1       | KIF4A              |
| TC0200016099.hg.1       | HJURP              |
| TSUnmapped00000127.hg.1 | KIF15              |
| TC1000012525.hg.1       | ACBD7              |
| TC0100016952.hg.1       | UBE2T              |
| TC1900011226.hg.1       | KLK4               |
| TC0100015509.hg.1       | FAM72B             |
| TC0100012172.hg.1       | EXO1               |
| TC0800011148.hg.1       | CCNE2              |
| TC1700009043.hg.1       | BIRC5              |
| TC1200010946.hg.1       | NEMP1              |
| TC0100017095.hg.1       | speymorbo          |
| TC0100015310.hg.1       | SLC16A1            |
| TC0600007273.hg.1       | HIST1H1E           |
| TC0200016642.hg.1       | RP11-458N5.1       |
| TC1700007790.hg.1       | CDC6               |
| TC0100017216.hg.1       | NEK2               |
| TC0X00009582.hg.1       | UXT                |

|                   |               |
|-------------------|---------------|
| TC1100013075.hg.1 | DDIAS         |
| TC1900011470.hg.1 | UBE2S         |
| TC1200010961.hg.1 | NDUFA4L2      |
| TC0Y00007295.hg.1 | sybo          |
| TC0Y00007300.hg.1 | shorbo        |
| TC0Y00007302.hg.1 | pleybo        |
| TC0Y00007304.hg.1 | pabo          |
| TC1900009807.hg.1 | ASF1B         |
| TC0100008101.hg.1 | KIF2C         |
| TC1200011420.hg.1 | SLC6A15       |
| TC1300008371.hg.1 | CENPJ         |
| TC0100013700.hg.1 | CLSPN         |
| TC0600011231.hg.1 | Z98744.2      |
| TC0600007565.hg.1 | TCF19         |
| TC0600014348.hg.1 | NHSL1         |
| TC1500010715.hg.1 | BUB1B         |
| TC2200008189.hg.1 | DERL3         |
| TC0400011620.hg.1 | ZGRF1         |
| TC2000007135.hg.1 | RP5-1085F17.3 |
| TC0300013458.hg.1 | RPL39L        |
| TC0800009922.hg.1 |               |
| TC1800006448.hg.1 | TYMS          |
| TC1200007856.hg.1 | TMEM194A      |
| TC1700007374.hg.1 | kloyslo       |
| TC1500010707.hg.1 | ARHGAP11B     |
| TC2000009550.hg.1 | AURKA         |
| TC1200008843.hg.1 | FAM216A       |
| TC0300011360.hg.1 | PTPRG-AS1     |
| TC1000010986.hg.1 | RP11-442H21.2 |
| TC0800010919.hg.1 | CKS1BP7       |
| TC0900009456.hg.1 | RLN2          |
| TC0100009900.hg.1 | CIART         |
| TC0100010100.hg.1 | CKS1B         |
| TC0800009323.hg.1 |               |
| TC0200013912.hg.1 | CKAP2L        |
| TC1500008451.hg.1 | CTD-2027G2.1  |
| TC1100013184.hg.1 | CDCA5         |
| TC1700007469.hg.1 | ATAD5         |
| TC1500007237.hg.1 | SCG3          |
| TC0500010896.hg.1 | CKS1BP3       |
| TC1800007355.hg.1 | C18orf54      |
| TC1900007098.hg.1 | RNASEH2A      |
| TC1100006967.hg.1 | RP1-239B22.5  |



|                   |                                                       |
|-------------------|-------------------------------------------------------|
| TC1200007832.hg.1 | NABP2                                                 |
| TC1800007316.hg.1 | SKA1                                                  |
| TC0100015714.hg.1 | SV2A                                                  |
| TC1000012499.hg.1 |                                                       |
| TC0400012433.hg.1 | RP11-798M19.6; fleegy                                 |
| TC2200008367.hg.1 | CHEK2                                                 |
| TC0500012166.hg.1 | CDC25C                                                |
| TC0700008263.hg.1 | DBF4                                                  |
| TC1700008021.hg.1 |                                                       |
| TC0100017218.hg.1 | jerrerbo                                              |
| TC2000008314.hg.1 |                                                       |
| TC1200008643.hg.1 | marjawby                                              |
| TC0200014845.hg.1 | SPC25                                                 |
| TC1200009553.hg.1 | saswer                                                |
| TC0800008254.hg.1 | blarboyby                                             |
| TC0900008227.hg.1 | kumire                                                |
| TC0600007700.hg.1 | KIFC1                                                 |
| TC0300012475.hg.1 | TOPBP1                                                |
| TC0800010630.hg.1 | GGH                                                   |
| TC0400011477.hg.1 | CENPE                                                 |
| TC0600007138.hg.1 | E2F3                                                  |
| TC1300009088.hg.1 | DIAPH3                                                |
| TC0600009111.hg.1 | tawglorby                                             |
| TC1000007156.hg.1 | RP11-192N10.2                                         |
| TC0100014660.hg.1 | FUBP1                                                 |
| TC1700008719.hg.1 | KPNA2                                                 |
| TC2100007795.hg.1 | LINC00515                                             |
| TC0600011187.hg.1 | AL021807.1                                            |
| TC1200009868.hg.1 | DDX12P; DDX11                                         |
| TC1400009710.hg.1 | ACYP1                                                 |
| TC0100014432.hg.1 | DLEU2_5                                               |
| TC1600006904.hg.1 | RMI2                                                  |
| TC1100013071.hg.1 | POLD3                                                 |
| TC1200008642.hg.1 | PARPBP                                                |
| TC0200016442.hg.1 | MSH2                                                  |
| TC1200008598.hg.1 | reyglawby                                             |
| TC1100006966.hg.1 | NCR3LG1                                               |
| TC0100014428.hg.1 | ITGB3BP                                               |
| TC0500008107.hg.1 | SLF1                                                  |
| TC0100007378.hg.1 | CLIC4                                                 |
| TC1100011109.hg.1 | SNORD22; SNORD29; SNORD31; SNORD30; SNORD28; SNORD27; |
| TC0X00011368.hg.1 | SNORD26; SNORD25; SNHG1                               |
|                   | SSX2; SSX2B                                           |

|                   |                                 |
|-------------------|---------------------------------|
| TC1900010675.hg.1 | FBL                             |
| TC1000010794.hg.1 | DBF4P1                          |
| TC1100009239.hg.1 | AP003391.1                      |
| TC1400008705.hg.1 | SLC7A8                          |
| TC1100013022.hg.1 | FADS2                           |
| TC1600008567.hg.1 | CENPN                           |
| TC1900007591.hg.1 |                                 |
| TC1800007213.hg.1 |                                 |
| TC1000008798.hg.1 | SFR1                            |
| TC1300007194.hg.1 | DLEU2_4                         |
| TC0X00007397.hg.1 | LINC01420                       |
| TC1300006739.hg.1 |                                 |
| TC0300007223.hg.1 | KIF15                           |
| TC1200010105.hg.1 | RECQL                           |
| TC0100014228.hg.1 | LRP8                            |
| TC1200010566.hg.1 | SENP1                           |
| TC0Y00007298.hg.1 | skybor                          |
| TC0700012959.hg.1 | EZH2                            |
| TC0900011156.hg.1 |                                 |
| TC0700011552.hg.1 | keysmeebu                       |
| TC0700009042.hg.1 | RP11-62J1.3                     |
| TC1400009829.hg.1 | CEP128                          |
| TC1300006849.hg.1 | RP11-142E9.1                    |
| TC0100007512.hg.1 | GPR3                            |
| TC0700012661.hg.1 | ploybler                        |
| TC1200012143.hg.1 | CIT; MIR1178                    |
| TC1300007196.hg.1 | DLEU2_6                         |
| TC0900009347.hg.1 | kawspaw                         |
| TC1700009870.hg.1 | UBE2S; UBE2SP1                  |
| TC1300008938.hg.1 | DLEU2; MIR15A; MIR16-1; MIR3613 |
| TC1600011494.hg.1 | ARL6IP1                         |
| TC0700011769.hg.1 | glorsmerbu                      |
| TC0100013071.hg.1 | MFAP2                           |
| TC0700010466.hg.1 | nacheeby                        |
| TC1200006700.hg.1 | FOXJ2                           |
| TC1900007515.hg.1 | ZNF738                          |
| TC0500008312.hg.1 | STARD4-AS1                      |
| TC0700010247.hg.1 | RPA3                            |
| TC1200012652.hg.1 |                                 |
| TC0100015707.hg.1 | HIST2H4A; HIST2H4B              |
| TC1300007192.hg.1 | DLEU2_3                         |
| TC1400007174.hg.1 | RP11-589M4.1                    |
| TC1600011399.hg.1 | MT1X                            |

|                   |                         |
|-------------------|-------------------------|
| TC0X00010578.hg.1 | bygar                   |
| TC0X00010585.hg.1 | florgar                 |
| TC1400008992.hg.1 |                         |
| TC1400008055.hg.1 | IFI27L1                 |
| TC0100007841.hg.1 | CDCA8                   |
| TC0800012349.hg.1 | MTBP                    |
| TC1800008683.hg.1 |                         |
| TC0700011329.hg.1 |                         |
| TC1900006861.hg.1 | CTD-3193O13.11          |
| TC0800007459.hg.1 | POMK                    |
| TC0100009953.hg.1 | RP11-126K1.8; skorporbo |
| TC0800007086.hg.1 | DPYSL2                  |
| TC0800007732.hg.1 | toyskoybu               |
| TC0100015553.hg.1 | plawbey                 |
| TC0100010553.hg.1 | C1orf112                |
| TC1100010255.hg.1 | nykoyby                 |
| TC0600011075.hg.1 | glosoby                 |
| TC2200007312.hg.1 | LGALS1                  |
| TC1000007092.hg.1 | MASTL                   |
| TC0600008134.hg.1 |                         |
| TC0X00010465.hg.1 | NUP62CL                 |
| TC0500011868.hg.1 |                         |
| TC1200007864.hg.1 | NXPH4                   |
| TC0700012221.hg.1 | SLC26A3                 |
| TC1200008883.hg.1 | LOC100101246            |
| TC1300009673.hg.1 | TEX30                   |
| TC0200016563.hg.1 | KLHL23                  |
| TC0900009458.hg.1 | RLN1                    |
| TC0X00010586.hg.1 | spagar                  |
| TC0100015058.hg.1 | SASS6                   |
| TC0500013320.hg.1 | GTF2H2                  |
| TC0100018440.hg.1 | STIL                    |
| TC0200013785.hg.1 | MIR548AU                |
| TC1200012337.hg.1 | sugawby                 |
| TC2200008704.hg.1 | DMC1                    |
| TC1500006571.hg.1 |                         |
| TC0700013618.hg.1 | MGC27345                |
| TC0600009927.hg.1 |                         |
| TC0400012964.hg.1 | SCLT1                   |
| TC0300006613.hg.1 | FANCD2P2                |
| TC2200007662.hg.1 | GTSE1                   |
| TC1200010625.hg.1 |                         |
| TC0100017297.hg.1 | forloybo                |

|                         |                |
|-------------------------|----------------|
| TC1600010168.hg.1       | SHCBP1         |
| TC0X00007314.hg.1       | RP11-258C19.7  |
| TC0600011543.hg.1       |                |
| TC1600007612.hg.1       | RP11-19N8.3    |
| TC0600007260.hg.1       | U91328.22      |
| TC0200016504.hg.1       | CCDC138        |
| TC1600007962.hg.1       | MT1A           |
| TC1500008485.hg.1       | IGF1R          |
| TC1000012011.hg.1       | RGS10          |
| TC0800007066.hg.1       |                |
| TC1700009974.hg.1       | SHMT1; MIR6778 |
| TC0700010259.hg.1       |                |
| TC1500007616.hg.1       | ZWILCH         |
| TC1600007966.hg.1       | MT1H           |
| TC1700009041.hg.1       |                |
| TC1500008946.hg.1       | wareru         |
| TC0700009807.hg.1       | INSIG1         |
| TC0100009561.hg.1       | TTF2           |
| TC1300008517.hg.1       | HMGB1          |
| TC0X00007298.hg.1       | SSX2B          |
| TC0800006488.hg.1       | ARHGEF10       |
| TSUnmapped00000242.hg.1 | KIF15          |
| TC0900012141.hg.1       | GCNT1          |
| TC1500009522.hg.1       | MNS1           |
| TC0100006707.hg.1       | CAMTA1         |
| TC0600007376.hg.1       | AL049822.1     |
| TC1700007641.hg.1       | DHRS11         |
| TC0700006567.hg.1       | TTYH3          |
| TC0700007400.hg.1       | boklarby       |
| TC1100006644.hg.1       | RRM1           |
| TC0X00010387.hg.1       | TMSB15A        |
| TC0600013206.hg.1       | SLC18B1        |
| TC0100007981.hg.1       |                |
| TC1500008328.hg.1       | BLM            |
| TC0X00010877.hg.1       | FAM122B        |
| TC0300006820.hg.1       | HMGB1P5        |
| TC1600010352.hg.1       | floyry         |
| TC0100014202.hg.1       | ORC1           |
| TC0800007416.hg.1       | GINS4          |
| TC0700006923.hg.1       | AC079780.3     |
| TC0900009948.hg.1       | ARHGEF39       |
| TC0300006573.hg.1       | EMC3-AS1       |
| TC1200008813.hg.1       | RP11-837J7.4   |

|                   |               |
|-------------------|---------------|
| TC200006811.hg.1  | sporsaw       |
| TC1400009999.hg.1 |               |
| TC0300011943.hg.1 | KIAA1524      |
| TC1500006692.hg.1 | HMG2P5        |
| TC0400012951.hg.1 | SLC9B2        |
| TC1700006592.hg.1 | GSG2          |
| TC1600011467.hg.1 | PKMYT1        |
| TC0100015562.hg.1 | skawybo       |
| TC1900007496.hg.1 |               |
| TC1500006965.hg.1 | RAD51         |
| TC2100007316.hg.1 | H2BFS         |
| TC1200006444.hg.1 | CCDC77        |
| TC0100010183.hg.1 | furubu        |
| TC0700013050.hg.1 | KCNH2         |
| TC1000009163.hg.1 | LOC399815     |
| TC1300008723.hg.1 |               |
| TC0900008493.hg.1 |               |
| TC0900007663.hg.1 | CEP78         |
| TC1400006822.hg.1 | choymeeby     |
| TC0100011367.hg.1 | royaro        |
| TC1200008793.hg.1 |               |
| TC0100012283.hg.1 | RP11-397A15.4 |
| TC1400006459.hg.1 | CTD-2314B22.1 |
| TC0600009322.hg.1 | HSF2          |
| TC0100007931.hg.1 | sorpubu       |
| TC0300014075.hg.1 | TRIM59        |
| TC0600014139.hg.1 | PRIM2         |
| TC0700009331.hg.1 |               |
| TC0500011188.hg.1 | HMG2P4        |
| TC0900011668.hg.1 | NUP188        |
| TC0200012643.hg.1 | CCDC88A       |
| TC1000012132.hg.1 |               |
| TC1600007961.hg.1 | MT1JP         |
| TC1600010348.hg.1 | RP11-36117.2  |
| TC1400007500.hg.1 | ARG2          |
| TC1100011069.hg.1 |               |
| TC0400012358.hg.1 |               |
| TC0400008441.hg.1 |               |
| TC0100013289.hg.1 | flawlarbo     |
| TC0100007858.hg.1 | UTP11L        |
| TC1200010917.hg.1 | TIMELESS      |
| TC1100009103.hg.1 | mochoy        |
| TC1200008490.hg.1 | RN7SL330P     |

|                         |                                                     |
|-------------------------|-----------------------------------------------------|
| TC0700008430.hg.1       | SDHAF3                                              |
| TC1200012243.hg.1       |                                                     |
| TC0300007480.hg.1       | blofoybo                                            |
| TC1200009088.hg.1       | RP11-364C11.3                                       |
| TC1600010080.hg.1       | kerper                                              |
| TC1000010847.hg.1       | DNA2                                                |
| TC1700007938.hg.1       | RPL21P4                                             |
| TC0200008809.hg.1       | AC073415.2                                          |
| TC0100014243.hg.1       | NDC1                                                |
| TC1600011408.hg.1       | CKLF; CKLF-CMTM1                                    |
| TC1600010421.hg.1       | MT1G                                                |
| TC1200011009.hg.1       |                                                     |
| TC0100008812.hg.1       | PTGFR                                               |
| TC1100007217.hg.1       | QSER1                                               |
| TC0X00009064.hg.1       | RP11-120D5.1; TCONS_00016946; TCONS_00017038; perva |
| TC0100007367.hg.1       |                                                     |
| TC0500011988.hg.1       | doyslerby                                           |
| TC1100009871.hg.1       |                                                     |
| TC1600007955.hg.1       | MT3                                                 |
| TC0100009333.hg.1       | GPSM2                                               |
| TC1600011186.hg.1       | SLC7A5                                              |
| TC1900007530.hg.1       |                                                     |
| TC1200006447.hg.1       | LOC100049716; RP11-218M22.1                         |
| TC1100011051.hg.1       | plychoy                                             |
| TC0800008681.hg.1       | gychoby                                             |
| TC2100007485.hg.1       | CH507-42P11.1                                       |
| TC1800009258.hg.1       | ZNF519                                              |
| TC0300011009.hg.1       | CDC25A                                              |
| TC1100012949.hg.1       | IFITM1                                              |
| TC1100011480.hg.1       | flyglarbu                                           |
| TSUnmapped00000518.hg.1 | RP11-110I1.12                                       |
| TC0X00008747.hg.1       | GABRQ                                               |
| TC1200007616.hg.1       | chawjorby                                           |
| TC0700009488.hg.1       | CASP2                                               |
| TC0100014434.hg.1       | DLEU2_3                                             |
| TC0200014927.hg.1       |                                                     |
| TC0300008748.hg.1       | sikeyu                                              |
| TC0600014233.hg.1       | SSR1                                                |
| TC1200012697.hg.1       | RN7SL737P                                           |
| TC0700011698.hg.1       | TMEM243                                             |
| TC0800009750.hg.1       |                                                     |
| TC1800009011.hg.1       | NETO1                                               |
| TC0900010930.hg.1       | yomemu                                              |

|                   |                          |
|-------------------|--------------------------|
| TC0X00008127.hg.1 |                          |
| TC0300011732.hg.1 | veedubo                  |
| TC1200007540.hg.1 | RP11-386G11.3; kareri    |
| TC2200009270.hg.1 | APOBEC3B                 |
| TC0100015711.hg.1 | HIST2H2AB                |
| TC0100007463.hg.1 | HMG2                     |
| TC1100008445.hg.1 | fluchor                  |
| TC1600009102.hg.1 | RNPS1                    |
| TC0600011697.hg.1 | CCDC167                  |
| TC1100010979.hg.1 | fleyspoyby               |
| TC2100008499.hg.1 | SMIM11A                  |
| TC0200008791.hg.1 | AC009963.4               |
| TC0X00009117.hg.1 | FANCB                    |
| TC1900006870.hg.1 | CTD-3193O13.14           |
| TC0200009978.hg.1 | PDK1                     |
| TC1500008945.hg.1 |                          |
| TC1100007053.hg.1 | RP11-701I24.1            |
| TC1200011853.hg.1 | doytubo                  |
| TC0500008878.hg.1 | PCDHB17P                 |
| TC1600009803.hg.1 | HMG2P3                   |
| TC1600007019.hg.1 | AF001548.5               |
| TC1900011920.hg.1 | ZNF98                    |
| TC1600011383.hg.1 | TMEM265; SRCAP           |
| TC0400008183.hg.1 | BMPR1B                   |
| TC0300009452.hg.1 | RP11-362K14.7            |
| TC0200015269.hg.1 | wawdu                    |
| TC0100009658.hg.1 | SRGAP2C                  |
| TC1500006569.hg.1 | SNORD108; SNORD64; PWAR5 |
| TC1900008099.hg.1 |                          |
| TC2100006435.hg.1 | RP11-717F1.2             |
| TC1900007620.hg.1 | CTB-92J24.2              |
| TC1500010914.hg.1 | HDGFRP3                  |
| TC0100009145.hg.1 | swoplo                   |
| TC0800012456.hg.1 | RP11-383J24.6            |
| TC2000008242.hg.1 | RNF24                    |
| TC0X00011326.hg.1 | HPRT1                    |
| TC0400011540.hg.1 | wybobo                   |
| TC1500009227.hg.1 | AC011330.13              |
| TC1400009667.hg.1 | RP4-693M11.3             |
| TC1700007134.hg.1 | UBE2SP2                  |
| TC0500012213.hg.1 | CTD-2062A1.2             |
| TC0400012251.hg.1 | C4orf46                  |
| TC1900011835.hg.1 | AC005943.5               |

|                   |                               |
|-------------------|-------------------------------|
| TC1500009050.hg.1 | RP11-1008C21.2                |
| TC2100006460.hg.1 | SMIM11A                       |
| TC0800010274.hg.1 |                               |
| TC0400008569.hg.1 | gluswoby                      |
| TC1100009126.hg.1 |                               |
| TC0100016929.hg.1 | vukobu                        |
| TC1200012244.hg.1 |                               |
| TC1900011113.hg.1 | GYS1                          |
| TC0800007640.hg.1 | RP11-463C14.1                 |
| TC0100011349.hg.1 |                               |
| TC0800009425.hg.1 | MIR4659B                      |
| TC2000006452.hg.1 | pytaw                         |
| TC0100012222.hg.1 | DESI2                         |
| TC0900008530.hg.1 | stawswu                       |
| TC1200011696.hg.1 | nemiri                        |
| TC0700012273.hg.1 | cherkaw                       |
| TC0500012799.hg.1 |                               |
| TC0200010295.hg.1 | shystoyby                     |
| TC0300009315.hg.1 | sloygobu                      |
| TC1300007483.hg.1 | BORA                          |
| TC0500006481.hg.1 |                               |
| TC1000007798.hg.1 | plunyby                       |
| TC0900007742.hg.1 | Y_RNA                         |
| TC0300010993.hg.1 | gafeybo                       |
| TC0500007295.hg.1 | keyfley                       |
| TC0100017523.hg.1 | LIN9                          |
| TC1700011472.hg.1 | RP11-583F2.6                  |
| TC0700008699.hg.1 | porkaw                        |
| TC1200010932.hg.1 | voychy                        |
| TC0500012975.hg.1 | DBN1                          |
| TC0100016018.hg.1 | CRABP2                        |
| TC1100008969.hg.1 | ELMOD1                        |
| TC1300007191.hg.1 | DLEU2_2                       |
| TC0300010403.hg.1 | HMG2P7                        |
| TC0800012386.hg.1 | PINX1; MIR1322                |
| TC1800007667.hg.1 | TIMM21                        |
| TC0100018081.hg.1 | ZNF670; ZNF695; ZNF670-ZNF695 |
| TC1600011527.hg.1 | VKORC1                        |
| TC0100013297.hg.1 | warlee                        |
| TC0600010918.hg.1 | mowame; RP3-467D16.3          |
| TC1600007591.hg.1 | RP11-67H24.3                  |
| TC0600011457.hg.1 | LSM2                          |
| TC0X00010804.hg.1 | ZNF280C                       |



|                   |                  |
|-------------------|------------------|
| TC0100016786.hg.1 | UCHL5            |
| TC1200007756.hg.1 | RP11-968A15.2    |
| TC2000008894.hg.1 | E2F1             |
| TC0700008265.hg.1 | ADAM22           |
| TC1600010072.hg.1 |                  |
| TC0300012164.hg.1 | POLQ             |
| TC1400009103.hg.1 | RP11-649E7.8     |
| TC1400008555.hg.1 | gavu             |
| TC0500012388.hg.1 | DPYSL3           |
| TC1100007003.hg.1 | LDHA             |
| TC0700009985.hg.1 | skeysleybu       |
| TC0200015643.hg.1 | BARD1            |
| TC0X00011319.hg.1 | TMSB15B          |
| TC1100008324.hg.1 | OR7E128P         |
| TC0800009830.hg.1 | REEP4            |
| TC1200009218.hg.1 | woytybo          |
| TC1400007370.hg.1 | RP11-307P22.1    |
| TC0300006794.hg.1 | lerdoybo         |
| TC2000009261.hg.1 | rervey           |
| TC1000008406.hg.1 | KIF20B           |
| TC0200009994.hg.1 | CDCA7            |
| TC0100007660.hg.1 | TMEM39B          |
| TC0700008368.hg.1 | kahore           |
| TC0400009222.hg.1 | spoberbo         |
| TC0600008486.hg.1 | OGFRL1           |
| TC1500010357.hg.1 |                  |
| TC1700007982.hg.1 | C17orf53         |
| TC0400008001.hg.1 |                  |
| TC0300010186.hg.1 | RAD18            |
| TC1200011903.hg.1 | flargeyby        |
| TC0800010036.hg.1 | gloyker          |
| TC1600007425.hg.1 | KIF22            |
| TC1400010630.hg.1 | TLL5             |
| TC0400011167.hg.1 | RP11-127B20.2    |
| TC1600009938.hg.1 | AC009133.21      |
| TC1900010422.hg.1 | skorcho; sleecho |
| TC1500009148.hg.1 | OIP5             |
| TC2200008304.hg.1 | sweefu           |
| TC0400011520.hg.1 | yosume           |
| TC0300011276.hg.1 | DENND6A          |
| TC2000010001.hg.1 | PIGU             |
| TC1100008323.hg.1 | LOC100129216     |
| TC1700010420.hg.1 | SLFN11           |

|                              |                  |
|------------------------------|------------------|
| TC1400010700.hg.1            | SIVA1            |
| TC0300010498.hg.1            |                  |
| TC0700011333.hg.1            | RP11-328P23.3    |
| TC0100011187.hg.1            | muley            |
| TC0600012118.hg.1            | RP11-323I14__A.1 |
| TC0400010657.hg.1            | mawvobo          |
| TC2200008129.hg.1            | kopaw            |
| TC0600006862.hg.1            | RP11-69L16.4     |
| TC1900009810.hg.1            |                  |
| TC0200007932.hg.1            |                  |
| TC0400011169.hg.1            | zeeko            |
| TC1500006701.hg.1            | ULK4P3; ULK4P2   |
| TC0X00007542.hg.1            | plerby           |
| TC0500007330.hg.1            | klawbey          |
| TC1400007049.hg.1            |                  |
| TC0100018246.hg.1            | LRRC8C           |
| TC1100012551.hg.1            |                  |
| TC1200011948.hg.1            | PCNPP1           |
| TC1200010782.hg.1            | tese             |
| TC1300008809.hg.1            | NUFIP1           |
| TC0200012741.hg.1            | watuyo           |
| TC1700007598.hg.1            | SNORD7           |
| TC0600007862.hg.1            | PIM1             |
| TC1700011304.hg.1            | MIR4737          |
| TC1700010072.hg.1            | RNASEH1P1        |
| TC2000007324.hg.1            | tatey            |
| TC1400009923.hg.1            |                  |
| TC1600011406.hg.1            | CKLF-CMTM1       |
| TC1700008232.hg.1            | PDK2             |
| TC0100009059.hg.1            | neymeebo         |
| TC1600008025.hg.1            |                  |
| TC0300009609.hg.1            | ACTL6A           |
| TC0700010934.hg.1            | H2AFV            |
| TC1000010647.hg.1            | smomoyby         |
| TC1200011721.hg.1            | nygleeby         |
| TCUn_KI270742v100006433.hg.1 |                  |
| TC1700012212.hg.1            | CCDC144NL-AS1    |
| TC1600008457.hg.1            |                  |
| TC0500013429.hg.1            | RNF130           |
| TC0700007398.hg.1            | ZMIZ2            |
| TC1900007592.hg.1            |                  |
| TC0100011487.hg.1            | TRAF5            |

|                   |                       |
|-------------------|-----------------------|
| TC0100011922.hg.1 |                       |
| TC2200008044.hg.1 | RNY1P9                |
| TC1100012504.hg.1 | RP11-11011.12         |
| TC0200010137.hg.1 |                       |
| TC0100007316.hg.1 |                       |
| TC1100008503.hg.1 | RP11-111M22.4         |
| TC0300006543.hg.1 |                       |
| TC1000006858.hg.1 | HSPA14                |
| TC0500010081.hg.1 | FAM173B               |
| TC1500008886.hg.1 |                       |
| TC0300011154.hg.1 | POC1A                 |
| TC0X00011121.hg.1 | GABRE; MIR224; MIR452 |
| TC1200008525.hg.1 | SNRPF                 |
| TC0100018424.hg.1 | HNRNPR                |
| TC1000012600.hg.1 | FAM24B                |
| TC1200007272.hg.1 | dawchaw               |
| TC0700011964.hg.1 | lyneeby               |
| TC1100009080.hg.1 | rawglybu              |
| TC1600007959.hg.1 | MT1E                  |
| TC0900008601.hg.1 |                       |
| TC0100016832.hg.1 | SEPT14P12             |
| TC0400007975.hg.1 |                       |
| TC0100018084.hg.1 | mimaha                |
| TC1200008176.hg.1 | LGR5                  |
| TC0500010994.hg.1 | zawzorby              |
| TC2100007621.hg.1 | LOC100131399          |
| TC0300010059.hg.1 |                       |
| TC1100009618.hg.1 | GLB1L2                |
| TC1000011885.hg.1 | DCLRE1A               |
| TC0X00008437.hg.1 | STK26                 |
| TC1400006872.hg.1 |                       |
| TC0400006546.hg.1 | WHSC1                 |
| TC0100012704.hg.1 | snarloybo             |
| TC0400010115.hg.1 | wawfloy               |
| TC1000011006.hg.1 | boymoby               |
| TC0300006725.hg.1 |                       |
| TC1500008346.hg.1 | PRC1-AS1              |
| TC1300008940.hg.1 | swosheybu             |
| TC1400006476.hg.1 | CTD-2311B13.10        |
| TC0100014120.hg.1 | plarmawbu             |
| TC1100008655.hg.1 |                       |
| TC1900008063.hg.1 |                       |
| TC1400008772.hg.1 | HMG2P6                |

|                   |                |
|-------------------|----------------|
| TC1900011697.hg.1 | ZNF730         |
| TC1600010850.hg.1 | kukiri         |
| TC0800006567.hg.1 | MIR4659A       |
| TC0900012212.hg.1 | PLIN2          |
| TC0100007690.hg.1 | RBBP4          |
| TC1500006513.hg.1 |                |
| TC0400012619.hg.1 |                |
| TC0600009967.hg.1 | swajee         |
| TC1900007570.hg.1 | ZNF492         |
| TC0100008089.hg.1 | plylybo        |
| TC0500007603.hg.1 |                |
| TC0100006469.hg.1 | LINC01128      |
| TC1100011740.hg.1 | RNU6-126P      |
| TC0700012597.hg.1 | wersloby       |
| TC1200012339.hg.1 | lucho          |
| TC0200006965.hg.1 | HMG2P20        |
| TC0200012513.hg.1 | flojoybu       |
| TC1200011538.hg.1 |                |
| TC0300008133.hg.1 | CMSS1          |
| TC1200012338.hg.1 | THRIL          |
| TC1600007468.hg.1 | farweybu       |
| TC0500008567.hg.1 |                |
| TC1200006733.hg.1 | RP11-20D14.6   |
| TC0700012790.hg.1 |                |
| TC0800007900.hg.1 | keegarby       |
| TC0800008546.hg.1 | ENY2           |
| TC2000008315.hg.1 |                |
| TC0800008746.hg.1 | DUTP2          |
| TC0200013655.hg.1 |                |
| TC0800007109.hg.1 |                |
| TC0100009144.hg.1 | skoroybo       |
| TC1500008936.hg.1 | RP11-632K20.8  |
| TC1400010573.hg.1 |                |
| TC0200011720.hg.1 | ODC1; SNORA80B |
| TC1700009405.hg.1 | skorvybu       |
| TC0400009228.hg.1 | sneyga         |
| TC1300008941.hg.1 | chofarby       |
| TC0900009887.hg.1 |                |
| TC0800008641.hg.1 | MED30          |
| TC0100009873.hg.1 | AC239868.3     |
| TC1100010163.hg.1 |                |
| TC0100011541.hg.1 |                |
| TC2200008839.hg.1 | HMG2P10        |

|                              |                            |
|------------------------------|----------------------------|
| TC2000008313.hg.1            | AL035461.1                 |
| TC1700010742.hg.1            | HMG2P15                    |
| TC1300006521.hg.1            |                            |
| TC1700011894.hg.1            | voskee                     |
| TC0500009274.hg.1            | FABP6                      |
| TC0200016353.hg.1            | jawklo                     |
| TCUn_KI270742v100006444.hg.1 | juzeybo                    |
| TC2100007488.hg.1            | CH507-24F1.2               |
| TC0100018291.hg.1            | FLG-AS1                    |
| TC1900007964.hg.1            | LINC01535                  |
| TC1700011303.hg.1            | AC005702.2                 |
| TC1400010717.hg.1            | PPP1R3E                    |
| TC1400007440.hg.1            | MTHFD1                     |
| TC0200010483.hg.1            | SNORD11                    |
| TC1900011382.hg.1            | MYADM                      |
| TC0100014762.hg.1            | SSX2IP                     |
| TC2000007060.hg.1            |                            |
| TC1700008129.hg.1            | Y_RNA                      |
| TC2000008516.hg.1            | SNX5                       |
| TC0100011667.hg.1            | RNU6ATAC35P; RP11-295M18.7 |
| TC0300009474.hg.1            | CLDN11                     |
| TC2200009182.hg.1            | DUXAP8                     |
| TC1400006461.hg.1            | DUXAP10; LINC01296         |
| TC2000009972.hg.1            | SNRPB                      |
| TC0700009697.hg.1            |                            |
| TC0200006682.hg.1            | kahimo                     |
| TC0900011265.hg.1            |                            |
| TC0100013405.hg.1            |                            |
| TC1700008534.hg.1            |                            |
| TC1200007628.hg.1            | RNU7-39P                   |
| TC0100016494.hg.1            | SCARNA3                    |
| TC0600012839.hg.1            | CDK19                      |
| TC1100012269.hg.1            | ARHGAP20                   |
| TC2000007188.hg.1            | MIR644A                    |
| TC1600006994.hg.1            | snysmor                    |
| TC0100009334.hg.1            | forreebo                   |
| TC1500008091.hg.1            | UBE2Q2P6                   |
| TC0X00010575.hg.1            | skafo                      |
| TC0X00010576.hg.1            | seevy                      |
| TC0X00010582.hg.1            | smygar                     |
| TC2100008424.hg.1            | SLC19A1                    |
| TC0400010633.hg.1            | spuflor                    |

|                   |                                    |
|-------------------|------------------------------------|
| TC1400008364.hg.1 | wersyby                            |
| TC1300008945.hg.1 | gachy                              |
| TC1800006834.hg.1 | SNRPD1                             |
| TC0100007964.hg.1 | ZNF684                             |
| TC0200010608.hg.1 | raklu                              |
| TC0X00009782.hg.1 |                                    |
| TC1700008171.hg.1 | PRAC2                              |
| TC0500008157.hg.1 | LNPEP                              |
| TC0300010021.hg.1 |                                    |
| TC0100009659.hg.1 | plobey                             |
| TC1300008726.hg.1 | TUBBP2                             |
| TC0100017056.hg.1 | foyrobo                            |
| TC0500007844.hg.1 | CTC-564N23.2                       |
| TC1500009596.hg.1 | rumiru                             |
| TC0100017733.hg.1 | TSNAX                              |
| TC1600008366.hg.1 | RP5-991G20.1; RP5-991G20.4; wateri |
| TC0400008428.hg.1 |                                    |
| TC0900009993.hg.1 |                                    |
| TC1500010841.hg.1 | CHRFAM7A                           |
| TC1500010916.hg.1 | UBE2Q2P1                           |
| TC0300012384.hg.1 | H1FX                               |
| TC0600012862.hg.1 |                                    |
| TC1100012741.hg.1 | klawglybu                          |
| TC1500007937.hg.1 | RP11-741G21.1                      |
| TC1100009433.hg.1 | HYLS1                              |
| TC1700009370.hg.1 | fleesker                           |
| TC0100015936.hg.1 |                                    |
| TC0800008268.hg.1 | mohomu                             |
| TC0100008260.hg.1 | CDKN2C                             |
| TC0600008350.hg.1 | BAG2                               |
| TC0500009808.hg.1 |                                    |
| TC1200012086.hg.1 | parney                             |
| TC0800008362.hg.1 | varkey                             |
| TC2200007905.hg.1 |                                    |
| TC1300006890.hg.1 | EXOSC8                             |
| TC0100011549.hg.1 | FLVCR1                             |
| TC0100015793.hg.1 | POGZ                               |
| TC0900010918.hg.1 | parplawbu                          |
| TC0300009784.hg.1 | muveebo                            |
| TC1800008482.hg.1 | TPGS2                              |
| TC1600010590.hg.1 | RP11-403P17.2; RP11-403P17.6       |
| TC1600010475.hg.1 | CFAP20                             |
| TC0800012235.hg.1 | jorblu                             |

|                   |                        |
|-------------------|------------------------|
| TC0100015023.hg.1 | DPYD                   |
| TC2200009048.hg.1 |                        |
| TC0100018482.hg.1 | HIST2H2AA4; HIST2H2AA3 |
| TC1800007851.hg.1 | RP11-720L2.2; poso     |
| TC0900006485.hg.1 |                        |
| TC1100008401.hg.1 | zeekarby               |
| TC1600009250.hg.1 | RP11-127I20.8          |
| TC1200007906.hg.1 | XRCC6BP1               |
| TC0100015706.hg.1 | AC239868.2             |
| TC1100011034.hg.1 |                        |
| TC0900008226.hg.1 |                        |
| TC0800008315.hg.1 | zervarby               |
| TC1900008615.hg.1 | CTC-518B2.12           |
| TC0700013534.hg.1 | GGCT                   |
| TC0800012198.hg.1 | wawoyby                |
| TC1700009659.hg.1 |                        |
| TC1700009206.hg.1 |                        |
| TC1900007506.hg.1 | dosha                  |
| TC0200009433.hg.1 | gorgabo                |
| TC1900012007.hg.1 | NUP62; IL4I1           |
| TC1700012209.hg.1 | SLC47A1                |
| TC0400007482.hg.1 |                        |
| TC2100008568.hg.1 | TMPRSS2                |
| TC0100015552.hg.1 | spazeybo; sperzerbo    |
| TC1200012102.hg.1 | RP11-33N14.3           |
| TC1800007074.hg.1 | RP11-158H5.8           |
| TC1900007502.hg.1 | ZNF85                  |
| TC0300012028.hg.1 |                        |
| TC0200015448.hg.1 | teydaw                 |
| TC1600010098.hg.1 |                        |
| TC0100008978.hg.1 | LRRC8B                 |
| TC0600014087.hg.1 |                        |
| TC1100012002.hg.1 | MRE11A                 |
| TC1700006558.hg.1 | RP11-135N5.3           |
| TC1700011137.hg.1 | persler                |
| TC0800007059.hg.1 | buworby                |
| TC0400007074.hg.1 |                        |
| TC0700009852.hg.1 | torjoy                 |
| TC1500007056.hg.1 | ADAL                   |
| TC0100015725.hg.1 | ANP32E                 |
| TC0500007044.hg.1 | CDH6                   |
| TC1000011478.hg.1 | CYP2C8                 |
| TC0300008950.hg.1 | godubu                 |

|                                    |                            |
|------------------------------------|----------------------------|
| TC2000007274.hg.1                  |                            |
| TC0100013066.hg.1                  | RP11-108M9.4               |
| TC0900008072.hg.1                  |                            |
| TC0900008078.hg.1                  | RP11-435O5.4               |
| TC17_GL000205v2_random0006441.hg.1 | AC011841.1                 |
| TC0100009930.hg.1                  | seykarbo                   |
| TC0900011262.hg.1                  | POLE3                      |
| TC1800009221.hg.1                  | RBBP8; MIR4741             |
| TC1200009043.hg.1                  | sheygoyby                  |
| TC0800011458.hg.1                  | gyverby                    |
| TC1700007606.hg.1                  | TAF15                      |
| TC0500007468.hg.1                  | swavybo                    |
| TC1700007257.hg.1                  | AC087294.2; teeroy         |
| TC1200012573.hg.1                  | RHNO1                      |
| TC0100007053.hg.1                  |                            |
| TC0X00010357.hg.1                  | GLA                        |
| TC1000009065.hg.1                  | FAM45A                     |
| TC1700007597.hg.1                  | RP11-1094M14.11            |
| TC0100009621.hg.1                  | PHGDH                      |
| TC1700008519.hg.1                  |                            |
| TC0600007259.hg.1                  | U91328.19                  |
| TC1100012712.hg.1                  | ACRV1                      |
| TC1600007424.hg.1                  | ZG16                       |
| TC2000006565.hg.1                  |                            |
| TC1900008499.hg.1                  | gloywu                     |
| TC1400008546.hg.1                  | LINC01296; DUXAP10         |
| TC1100009423.hg.1                  | ferchor                    |
| TC0700010145.hg.1                  |                            |
| TC0200010637.hg.1                  | gorgobu                    |
| TC2200007089.hg.1                  | slarpoy                    |
| TC0400010887.hg.1                  | bygaw                      |
| TC1200009446.hg.1                  | jukarby                    |
| TC0300009783.hg.1                  |                            |
| TC0400010669.hg.1                  | MTCO3P42                   |
| TC0100011273.hg.1                  | burabu                     |
| TC1000008937.hg.1                  | LOC103344931; RP11-57H14.4 |
| TC2100006455.hg.1                  | CH507-254M2.1              |
| TC2100006458.hg.1                  | CH507-254M2.2              |
| TC0100017889.hg.1                  | LINC01139                  |
| TC0100015710.hg.1                  | AC239868.1                 |
| TC0100009876.hg.1                  | HIST2H2AA3; HIST2H2AA4     |
| TC1700011302.hg.1                  | AC005702.3                 |



|                   |              |
|-------------------|--------------|
| TC0100015963.hg.1 | zeereebu     |
| TC0100008589.hg.1 | shoypeybu    |
| TC0600011095.hg.1 | cheyfloyby   |
| TC1200012786.hg.1 | RP11-350F4.2 |
| TC0100013616.hg.1 |              |
| TC1800006715.hg.1 | IMPA2        |
| TC2200007907.hg.1 | MIR3198-1    |
| TC2000009382.hg.1 |              |
| TC0600006587.hg.1 | HMG2P28      |
| TC1400010266.hg.1 |              |
| TC0400011189.hg.1 | Y_RNA        |
| TC0700012662.hg.1 |              |
| TC1600007883.hg.1 | RP11-44F14.9 |
| TC0400008567.hg.1 | zasneeby     |
| TC0200012651.hg.1 |              |
| TC0300009258.hg.1 | MME          |
| TC2200008352.hg.1 | tovaw        |
| TC2100008051.hg.1 | EZH2P1       |
| TC1200008008.hg.1 |              |
| TC0600011404.hg.1 | CCHCR1       |
| TC0700013375.hg.1 | ZNF273       |
| TC0900008946.hg.1 |              |
| TC0700010468.hg.1 | morblar      |
| TC0100012233.hg.1 | zerkloy      |
| TC0500010135.hg.1 | gerskeybu    |
| TC1600008277.hg.1 | SNORD111     |
| TC0100008644.hg.1 | skernubu     |
| TC0700006941.hg.1 | NPY          |
| TC0100009234.hg.1 |              |
| TC0800010685.hg.1 | MYBL1        |
| TC2000007627.hg.1 | CSE1L        |
| TC0100009700.hg.1 | SRGAP2D      |
| TC0X00010164.hg.1 | CHMP1B2P     |
| TC1000008746.hg.1 |              |
| TC0700007410.hg.1 | sweesmubu    |
| TC2200007616.hg.1 | neyror       |
| TC1600007411.hg.1 | kleyner      |
| TC0600012646.hg.1 |              |
| TC0100012889.hg.1 | MAD2L2       |
| TC1600010809.hg.1 | TXNL4B       |
| TC0100015923.hg.1 |              |
| TC0800010149.hg.1 |              |
| TC0600008804.hg.1 |              |

|                   |                 |
|-------------------|-----------------|
| TC1400007446.hg.1 |                 |
| TC0200015463.hg.1 | WDR12           |
| TC0600011902.hg.1 |                 |
| TC0100013119.hg.1 | MIR1290         |
| TC1200009461.hg.1 | EP400; SNORA49  |
| TC0100013389.hg.1 |                 |
| TC1700011264.hg.1 | U3              |
| TC0100009931.hg.1 | gapybu          |
| TC1500006681.hg.1 | PDCD6IPP2       |
| TC1800008735.hg.1 | SNRPGP2         |
| TC2100006498.hg.1 | MTCO1P1         |
| TC0100017665.hg.1 |                 |
| TC1500010887.hg.1 | CLN6            |
| TC0900006806.hg.1 | fylee           |
| TC1200008638.hg.1 | RP11-554E23.4   |
| TC1200007011.hg.1 | RP11-282K24.3   |
| TC1900008191.hg.1 | mawber          |
| TC0600013027.hg.1 |                 |
| TC1900008121.hg.1 | SNRPA           |
| TC1200011694.hg.1 |                 |
| TC0600007240.hg.1 |                 |
| TC1600009850.hg.1 | TPRKBP2         |
| TC0900011591.hg.1 | MIR3911         |
| TC0100018058.hg.1 | lorleebo        |
| TC0100013755.hg.1 | RP11-109P14.9   |
| TC0900009646.hg.1 | SCARNA8         |
| TC0400006479.hg.1 | nersperby       |
| TC0100015286.hg.1 | jyleybo         |
| TC1900011475.hg.1 | ISOC2           |
| TC0600013352.hg.1 |                 |
| TC0300012648.hg.1 | HMG2P25         |
| TC0Y00006591.hg.1 |                 |
| TC1100011685.hg.1 |                 |
| TC0100014179.hg.1 | sneyboy         |
| TC0400007432.hg.1 |                 |
| TC1600010407.hg.1 | NUDT21          |
| TC1500010846.hg.1 | GOLGA8K; ULK4P1 |
| TC1800007958.hg.1 | RP11-835E18.4   |
| TC0900006484.hg.1 | boyplybu        |
| TC0400012551.hg.1 | DCTD            |
| TC0700011821.hg.1 | SGCE            |
| TC0600010750.hg.1 |                 |
| TC0700010688.hg.1 | neegloyby       |

|                         |                                  |
|-------------------------|----------------------------------|
| TC0900011061.hg.1       |                                  |
| TC1000008644.hg.1       | glupuby                          |
| TC0100007760.hg.1       | ZMYM1                            |
| TC0900009476.hg.1       | talo                             |
| TC0200007928.hg.1       | spoydarbu                        |
| TC1700006804.hg.1       | PFAS                             |
| TC0100014158.hg.1       | smorboy                          |
| TC0400008054.hg.1       | soflor                           |
| TC0100012817.hg.1       | vuply                            |
| TC0X00009581.hg.1       | ELK1                             |
| TC0300012885.hg.1       |                                  |
| TC0600012883.hg.1       | TUBE1                            |
| TC0200016561.hg.1       | KLHL23                           |
| TC1000008665.hg.1       | C10orf2                          |
| TC0800008269.hg.1       | mohomu                           |
| TC0600014095.hg.1       | RPP21                            |
| TC0300013568.hg.1       |                                  |
| TC0700008330.hg.1       | zawnuby                          |
| TC1100006738.hg.1       |                                  |
| TC1500009085.hg.1       |                                  |
| TC0Y00007152.hg.1       |                                  |
| TC1500010848.hg.1       | WHAMMP1                          |
| TC0700008539.hg.1       |                                  |
| TC0500012937.hg.1       | NOP16                            |
| TC1600011407.hg.1       | CMTM1                            |
| TC1600011360.hg.1       | SYT17                            |
| TC1400008629.hg.1       | wuswer                           |
| TC0400006440.hg.1       | fysperby                         |
| TC0600009626.hg.1       | ABRACL                           |
| TC0400011615.hg.1       | RP11-73K9.3                      |
| TC0X00007946.hg.1       | ARMCX4                           |
| TC0400007699.hg.1       | RP11-396M11.1                    |
| TC1100007095.hg.1       | LUZP2                            |
| TC0600007262.hg.1       | HIST1H3A                         |
| TC0100013972.hg.1       | steypobu                         |
| TC1700012077.hg.1       | RP11-498C9.15                    |
| TC0200010735.hg.1       | RP11-566E18.1                    |
| TC0500010078.hg.1       |                                  |
| TC1500010704.hg.1       | CTD-3092A11.2; TCONS_l2_00008519 |
| TC0500007864.hg.1       |                                  |
| TC1600007232.hg.1       | merro                            |
| TSUnmapped00000934.hg.1 |                                  |
| TC0100010659.hg.1       | Y_RNA                            |

|                   |                          |
|-------------------|--------------------------|
| TC0900009513.hg.1 | TMEM261                  |
| TC0900012138.hg.1 | LOC440896; RP11-561O23.5 |
| TC1900006984.hg.1 |                          |
| TC0100010834.hg.1 |                          |
| TC1500010913.hg.1 |                          |
| TC0700010694.hg.1 | NT5C3                    |
| TC0700012019.hg.1 | sparsmeybu               |
| TC0X00007191.hg.1 | EBP                      |
| TC0X00008395.hg.1 | chuna                    |
| TC1500009200.hg.1 | TTBK2                    |
| TC1000007791.hg.1 | zeynyby                  |
| TC2200008355.hg.1 |                          |
| TC0600014150.hg.1 | SMIM8                    |
| TC1900007472.hg.1 | AC078899.2               |
| TC1500008748.hg.1 | slawswo                  |
| TC0500007573.hg.1 | peeploby                 |
| TC0700010902.hg.1 | chertorbo                |
| TC0600008360.hg.1 | XXbac-BPG55C20.7         |
| TC0600012645.hg.1 | soglerby                 |
| TC1900009343.hg.1 |                          |
| TC1700012139.hg.1 |                          |
| TC1500008281.hg.1 | RNU7-111P                |
| TC1700012138.hg.1 | RP13-638C3.4             |
| TC0100006724.hg.1 | RP3-467L1.6              |
| TC1900007619.hg.1 | ZNF726; ZNF92P3          |
| TC0300007237.hg.1 | LIMD1                    |
| TC0100007787.hg.1 | nerrawbu                 |
| TC0600007534.hg.1 | PRR3                     |
| TC0700013228.hg.1 |                          |
| TC0200015267.hg.1 | kloyfoybu                |
| TC1700010777.hg.1 | U2                       |
| TC0900007953.hg.1 | CENPP                    |
| TC1300008930.hg.1 | chorwarby                |
| TC1600007568.hg.1 |                          |
| TC2000009623.hg.1 | glawraw                  |
| TC1200007931.hg.1 | SLC16A7                  |
| TC0700011783.hg.1 | zeynuby                  |
| TC0700007473.hg.1 | AC069282.6               |
| TC0300012216.hg.1 | CCDC14                   |
| TC1300010017.hg.1 |                          |
| TC0X00010442.hg.1 | TMSB15B; RP11-722G7.1    |
| TC1100010405.hg.1 | LIN7C                    |
| TC1900009943.hg.1 | HAUS8                    |

|                   |                                  |
|-------------------|----------------------------------|
| TC0600007344.hg.1 | PRSS16                           |
| TC0100012203.hg.1 | beemerbu                         |
| TC0300013289.hg.1 |                                  |
| TC0800007417.hg.1 |                                  |
| TC0300012783.hg.1 |                                  |
| TC1200011429.hg.1 | AC021887.1                       |
| TC0700010148.hg.1 |                                  |
| TC0300006669.hg.1 | LSM3                             |
| TC2200007090.hg.1 | bloyvaw                          |
| TC0900009489.hg.1 | GLDC                             |
| TC0100008643.hg.1 | skernubu                         |
| TC2200008195.hg.1 |                                  |
| TC1400010599.hg.1 | TTC6                             |
| TC0600013731.hg.1 | beeflawby                        |
| TC0100013165.hg.1 | sorkorbu                         |
| TC1200010361.hg.1 | AC046130.1                       |
| TC1600010495.hg.1 | wersnar                          |
| TC1000008436.hg.1 | kyparby                          |
| TC0900010886.hg.1 | PTCH1                            |
| TC1500010610.hg.1 | RP11-6O2.4                       |
| TC2200008485.hg.1 | RP11-247I13.6                    |
| TC1200008236.hg.1 | RP11-290L1.4                     |
| TC0200006698.hg.1 |                                  |
| TC0800011063.hg.1 | noyblu                           |
| TC0900009406.hg.1 |                                  |
| TC0600007265.hg.1 | HIST1H3C                         |
| TC0700011962.hg.1 | AZGP1                            |
| TC0200009986.hg.1 | ZAK; pk                          |
| TC0300009604.hg.1 | AC007620.3                       |
| TC1800006488.hg.1 | kawklar                          |
| TC1900007554.hg.1 | ZNF729                           |
| TC1200007278.hg.1 | zerblobu                         |
| TC2200008868.hg.1 | movee                            |
| TC0300006437.hg.1 | CHL1                             |
| TC0100012390.hg.1 | LOC729737; RP11-34P13.14         |
| TC0100009195.hg.1 | SLC35A3                          |
| TC1000008896.hg.1 | SMC3                             |
| TC0600011362.hg.1 | pawjor                           |
| TC1700006666.hg.1 | LOC101928000; AC012146.7; kosori |
| TC0100017096.hg.1 | sneymorbo                        |
| TC1100010017.hg.1 | blycher                          |
| TC0300013267.hg.1 |                                  |
| TC0200015331.hg.1 | RP11-84A12.1                     |

|                              |                             |
|------------------------------|-----------------------------|
| TC0X00010411.hg.1            |                             |
| TC0700011472.hg.1            | sparzeeby                   |
| TC1100009262.hg.1            | LOC102724301; CTD-2523D13.2 |
| TC1800009138.hg.1            | LINC01029                   |
| TC2000007818.hg.1            | tatora                      |
| TC1200009077.hg.1            |                             |
| TC0400009677.hg.1            |                             |
| TC0100013557.hg.1            | SNRNP40                     |
| TC0700010619.hg.1            | SCRN1                       |
| TC0900007239.hg.1            | chutorbu                    |
| TC1700007904.hg.1            | TUBG1                       |
| TC0200010729.hg.1            | XRCC5                       |
| TC0900010913.hg.1            | ZNF367                      |
| TC0400010418.hg.1            | RELL1                       |
| TC0100014657.hg.1            | RP11-181C21.4               |
| TC1600009515.hg.1            | moseru                      |
| TC0100014503.hg.1            | blorklor                    |
| TC0500010076.hg.1            |                             |
| TC1400010499.hg.1            | IGHV3-32                    |
| TC0900009001.hg.1            | SNORD62A; SNORD62B          |
| TC0900009002.hg.1            | SNORD62B; SNORD62A          |
| TC1900007640.hg.1            | CTC-459F4.6                 |
| TC0100018013.hg.1            | weewoybo                    |
| TC1500009516.hg.1            | koyzo                       |
| TC1100006739.hg.1            |                             |
| TC0100012285.hg.1            | fukoybu                     |
| TC1600007593.hg.1            | RP11-586K12.1               |
| TC1200008237.hg.1            | pufawby                     |
| TC1200009526.hg.1            | nychy                       |
| TC0300013091.hg.1            |                             |
| TCUn_GL000195v100006433.hg.1 | AC011043.2                  |
| TC1900007536.hg.1            |                             |
| TC0100014227.hg.1            | MAGOH                       |
| TC0700012546.hg.1            | forkee                      |
| TC0900007515.hg.1            |                             |
| TC0500013231.hg.1            | CATSPER3                    |
| TC0200015081.hg.1            | pawgeebo                    |
| TC0600009210.hg.1            |                             |
| TC0900011152.hg.1            | Y_RNA                       |
| TC0300012064.hg.1            | sparbobu                    |
| TC0X00008087.hg.1            | koho                        |
| TC0900008984.hg.1            | NUP214                      |

|                         |                                               |
|-------------------------|-----------------------------------------------|
| TC0100016328.hg.1       | ANKRD36BP1                                    |
| TC0300009035.hg.1       | TRPC1                                         |
| TC2000009596.hg.1       | CTCFL                                         |
| TC1900009577.hg.1       | bosey                                         |
| TC0600010962.hg.1       | DEK                                           |
| TC0900012219.hg.1       | CDKN2A                                        |
| TC0100015797.hg.1       | POGZ                                          |
| TC0400007471.hg.1       | nohiru                                        |
| TC1700007629.hg.1       | Y_RNA                                         |
| TC1700007699.hg.1       | Y_RNA                                         |
| TC1000011224.hg.1       |                                               |
| TC1200006995.hg.1       | pleyblybu                                     |
| TC1200010565.hg.1       | RP1-228P16.8                                  |
| TC0900009344.hg.1       | LINC01388; RP11-143M1.3; lawlar; RP11-143M1.4 |
| TC1700008761.hg.1       | RP1-193H18.2                                  |
| TC0800008458.hg.1       | jyveeby                                       |
| TC1200012108.hg.1       | smogoyby                                      |
| TC2200009166.hg.1       | poyblee                                       |
| TSUnmapped00000852.hg.1 |                                               |
| TC0300012356.hg.1       | norvawbo                                      |
| TC0300013636.hg.1       | ACAP2; ACAP2-IT1; AC090018.3                  |
| TC1400007697.hg.1       |                                               |
| TC0X00006816.hg.1       | PDK3                                          |
| TC0400008922.hg.1       | LSM6                                          |
| TC2000008792.hg.1       | MLLT10P1                                      |
| TC1500008743.hg.1       | klawswow                                      |
| TC0900008967.hg.1       | EXOSC2                                        |
| TC1000011357.hg.1       |                                               |
| TC1100012032.hg.1       |                                               |
| TC2100006444.hg.1       | CH507-145C22.1                                |
| TC0100012416.hg.1       | smerrabu                                      |
| TC1100011219.hg.1       |                                               |
| TC0200013249.hg.1       | LSM3P3                                        |
| TC0200013334.hg.1       | AC092651.1                                    |
| TC1000008954.hg.1       | CASP7                                         |
| TC1900006447.hg.1       |                                               |
| TC1900010209.hg.1       | ZNF724P                                       |
| TC0X00008953.hg.1       | jarfar                                        |
| TC0100015712.hg.1       |                                               |
| TC0500008467.hg.1       | SRFBP1                                        |
| TC0600009614.hg.1       | jervybo                                       |
| TC0700011699.hg.1       | Y_RNA                                         |
| TC0300009733.hg.1       | jeemerbu                                      |

|                   |                            |
|-------------------|----------------------------|
| TC1900007417.hg.1 | AC004447.2; himere         |
| TC1900011342.hg.1 |                            |
| TC0100016326.hg.1 |                            |
| TC0700011611.hg.1 | RNU6-530P                  |
| TC0900009274.hg.1 | TUBB4B                     |
| TC0700012159.hg.1 | PUS7                       |
| TC0500007415.hg.1 | GPX8                       |
| TC0300012728.hg.1 | PLSCR1                     |
| TC0200008682.hg.1 | TMEM182                    |
| TC0400010167.hg.1 | DCAF16                     |
| TC0200006833.hg.1 | GEN1                       |
| TC0500009637.hg.1 | morflaw                    |
| TC0700009257.hg.1 |                            |
| TC1000008975.hg.1 | CTB-1144G6.5               |
| TC1900010233.hg.1 |                            |
| TC0100008584.hg.1 | ALG6                       |
| TC0400010249.hg.1 | MIR573                     |
| TC1200010872.hg.1 | smunu                      |
| TC1700007376.hg.1 | RP11-192H23.6              |
| TC0100017722.hg.1 | C1orf131                   |
| TC1100009688.hg.1 |                            |
| TC0700006931.hg.1 | FAM221A                    |
| TC1900011383.hg.1 | AC008440.5                 |
| TC0100007026.hg.1 | ARHGEF19-AS1; RP4-733M16.2 |
| TC1700010842.hg.1 | RP11-1072C15.4             |
| TC0500006480.hg.1 |                            |
| TC0200007471.hg.1 | RHOQ                       |
| TC1500009015.hg.1 | AC021231.1                 |
| TC1700008712.hg.1 | sworsma                    |
| TC1700007788.hg.1 | skeeslu                    |
| TC1400008553.hg.1 |                            |
| TC1600010767.hg.1 | wyry                       |
| TC0800006870.hg.1 | RP11-349F21.4              |
| TC2000006813.hg.1 | MGME1                      |
| TC0100006845.hg.1 | Metazoa_SRP                |
| TC0400007799.hg.1 | SLC4A4                     |
| TC0100016262.hg.1 |                            |
| TC0500009011.hg.1 | klorflo                    |
| TC0200016025.hg.1 | LINC00471                  |
| TC1900011854.hg.1 | ELAVL1                     |
| TC0200008051.hg.1 | hitomo                     |
| TC0300010926.hg.1 | stoyveebo                  |
| TC0700008703.hg.1 | rakaw                      |



|                   |               |
|-------------------|---------------|
| TC0X00008724.hg.1 | HMGB3         |
| TC0600008991.hg.1 | QRSL1         |
| TC1600010564.hg.1 | RP11-256I9.2  |
| TC0800010726.hg.1 |               |
| TC1600009708.hg.1 | zyspar        |
| TC1200011755.hg.1 | NFYB          |
| TC0X00006715.hg.1 | SCML1         |
| TC2000006564.hg.1 |               |
| TC0700009328.hg.1 |               |
| TC1200011695.hg.1 | bartubo       |
| TC1100007026.hg.1 | ZDHHC13       |
| TC0700007200.hg.1 | rochorby      |
| TC0700012801.hg.1 | RNU6-797P     |
| TC1900007517.hg.1 |               |
| TC0100018359.hg.1 | TSNAX         |
| TC1400006821.hg.1 | G2E3          |
| TC1900010543.hg.1 | ZNF829        |
| TC0900009583.hg.1 | swashaw       |
| TC1200009923.hg.1 | klachu        |
| TC0200011196.hg.1 | sluneebo      |
| TC0700006918.hg.1 | chasmabu      |
| TC0600006807.hg.1 | floyreyby     |
| TC0500008133.hg.1 | gorja         |
| TC0700010897.hg.1 | yahore        |
| TC1500007094.hg.1 | RP11-151N17.1 |
| TC1800007131.hg.1 |               |
| TC0900007187.hg.1 | ALDH1B1       |
| TC0600010543.hg.1 |               |
| TC2100007157.hg.1 | shasoy        |
| TC0600011120.hg.1 | U91328.21     |
| TC1900007458.hg.1 | ZNF93         |
| TC0100016638.hg.1 |               |
| TC0500008405.hg.1 |               |
| TC0600006527.hg.1 |               |
| TC0500012491.hg.1 | ZNF300        |
| TC0100012299.hg.1 |               |
| TC0300006742.hg.1 |               |
| TC0100011522.hg.1 | AL360091.1    |
| TC0600006878.hg.1 |               |
| TC0X00007080.hg.1 | AL138744.1    |
| TC0200012855.hg.1 | doydee        |
| TC1100012229.hg.1 | KDELC2        |
| TC1100008192.hg.1 | wamarby       |

|                   |                |
|-------------------|----------------|
| TC0200008071.hg.1 | MTHFD2         |
| TC0600013179.hg.1 | OR2A4          |
| TC0300012572.hg.1 | CEP70          |
| TC1200009629.hg.1 | moygerby       |
| TC0200006678.hg.1 | norfybu        |
| TC1800008281.hg.1 | TMEM241        |
| TC2100006503.hg.1 |                |
| TC0800010356.hg.1 |                |
| TC0700009218.hg.1 | weeke          |
| TC1500010708.hg.1 |                |
| TC1600011042.hg.1 | SLC38A8        |
| TC0100013287.hg.1 | E2F2           |
| TC1400006965.hg.1 | GEMIN2         |
| TC1500010894.hg.1 | SNUPN          |
| TC0100012528.hg.1 | RP4-740C4.7    |
| TC1400006559.hg.1 | germoby        |
| TC0200015146.hg.1 | CACYBPP2       |
| TC0700009483.hg.1 | TAS2R40        |
| TC0500012275.hg.1 | keeskoyby      |
| TC1700010985.hg.1 | RNU6-1152P     |
| TC0100009578.hg.1 |                |
| TC0700012712.hg.1 | LUZP6; MTPN    |
| TC0700011748.hg.1 |                |
| TC1100012715.hg.1 | RP11-680F20.10 |
| TC0700011558.hg.1 | CTB-139P11.2   |
| TC0X00008088.hg.1 | vofor          |
| TC1900009860.hg.1 | smeeglu        |
| TC0600007377.hg.1 | HIST1H2BM      |
| TC1400006697.hg.1 | DHRS2          |
| TC0100006805.hg.1 | RBP7           |
| TC1500007972.hg.1 | CRABP1         |
| TC0600011226.hg.1 | snysneyby      |
| TC0100014191.hg.1 | RAB3B          |
| TC0600009310.hg.1 | GJA1           |
| TC1200011097.hg.1 | RP11-629N8.5   |
| TC0700006898.hg.1 | AC005682.5     |
| TC0600008981.hg.1 | AIM1           |
| TC1900007535.hg.1 | BNIP3P27       |
| TC1600006446.hg.1 | HBA1           |
| TC0200011710.hg.1 | SNORA2         |
| TC1600006445.hg.1 | HBA2           |
| TC1200009867.hg.1 | RP11-599J14.2  |
| TC1200008618.hg.1 | RNY1P16        |

|                              |                                |
|------------------------------|--------------------------------|
| TC0200011713.hg.1            |                                |
| TC1200008569.hg.1            | teychu                         |
| TC1600008930.hg.1            | lonor                          |
| TC0700006899.hg.1            | SNORD93                        |
| TC1900007117.hg.1            | charwy                         |
| TC1100008148.hg.1            |                                |
| TC0700010455.hg.1            |                                |
| TC1800007583.hg.1            | CTD-2541J13.2                  |
| TC0800009885.hg.1            | NKX3-1                         |
| TC0600011224.hg.1            | HIST1H2BL                      |
| TC0600011136.hg.1            | HIST1H2BG                      |
| TC0500008777.hg.1            | KIF20A                         |
| TC1800008952.hg.1            | DSEL                           |
| TC0100014995.hg.1            | CNN3                           |
| TC1500008110.hg.1            | RP11-382A20.1                  |
| TC1200011710.hg.1            | SYCP3                          |
| TC0100014020.hg.1            | peyparbu                       |
| TC1200009209.hg.1            | KNTC1                          |
| TC0800009958.hg.1            | CHRNA2                         |
| TC1100010987.hg.1            | FABP5                          |
| TC1200008619.hg.1            |                                |
| TC0400006435.hg.1            | AC253576.1                     |
| TC1700007947.hg.1            |                                |
| TC0400011170.hg.1            | lerflor                        |
| TC2100007482.hg.1            | CH507-24F1.1                   |
| TC1900008564.hg.1            | ATF5; MIR4751                  |
| TC2000007341.hg.1            | FAM83D                         |
| TC0700011050.hg.1            | FIGNL1                         |
| TC1300009240.hg.1            | FABP5P1                        |
| TC0200007942.hg.1            |                                |
| TC0600007285.hg.1            | HIST1H2AE                      |
| TC0700007793.hg.1            | VN1R42P                        |
| TC2100007498.hg.1            | CH507-154B10.2; CH507-145C22.4 |
| TC0300007320.hg.1            | RNU7-128P                      |
| TC0200007773.hg.1            | klukubu                        |
| TC1000012479.hg.1            |                                |
| TC0200008502.hg.1            | NCAPH                          |
| TCUn_GL000220v100006444.hg.1 |                                |
| TC1000012477.hg.1            | HELLS                          |
| TC0300013074.hg.1            | pergubo                        |
| TC1500009756.hg.1            | RBPM52                         |
| TC2200009017.hg.1            | stofer                         |

|                         |                             |
|-------------------------|-----------------------------|
| TC1700012391.hg.1       | MYO19                       |
| TC1500009738.hg.1       | KIAA0101; CSNK1G1           |
| TC0700013222.hg.1       | verzerby                    |
| TC0800008080.hg.1       | FABP5                       |
| TC1200011700.hg.1       | RP11-321F8.4                |
| TC0600011232.hg.1       | HIST1H1B                    |
| TC0500009320.hg.1       | HMMR                        |
| TC0800008417.hg.1       | bawshoy                     |
| TC0100008127.hg.1       | NASP                        |
| TC0100007478.hg.1       |                             |
| TC0900008286.hg.1       | SMC2                        |
| TSUnmapped00000255.hg.1 | KIF15                       |
| TC1200006753.hg.1       |                             |
| TC0500011705.hg.1       | NREP                        |
| TC1000006819.hg.1       | MCM10                       |
| TC1500006733.hg.1       | moyzarbu                    |
| TC0100008677.hg.1       | RP4-694A7.2                 |
| TC1200012666.hg.1       | TMEM19                      |
| TC2100008508.hg.1       | CHAF1B                      |
| TC1200009065.hg.1       | RFC5                        |
| TC0600011184.hg.1       | HIST1H2BJ                   |
| TC0200008331.hg.1       |                             |
| TC1100008199.hg.1       | GAL                         |
| TC2200006467.hg.1       | sotara                      |
| TC0700007788.hg.1       | blusleebu                   |
| TC0900008883.hg.1       | LOC100506100; RP11-545E17.3 |
| TC1400007201.hg.1       | CDKN3                       |
| TC1400009108.hg.1       | POLE2                       |
| TC0600010949.hg.1       | dawflorby                   |
| TC0X00009336.hg.1       |                             |
| TC0500009812.hg.1       | rarslabu                    |
| TC1600011357.hg.1       |                             |
| TC1600009525.hg.1       |                             |
| TC1700009679.hg.1       | AURKB                       |
| TC2200006607.hg.1       | CDC45                       |
| TC1200008568.hg.1       | TMPO                        |
| TC0600010802.hg.1       | ELOVL2                      |
| TC1100010290.hg.1       | E2F8                        |
| TC0200011902.hg.1       | chaneebo                    |
| TC0100017834.hg.1       | GNG4                        |
| TC2000006629.hg.1       | RP5-967N21.11               |
| TC0100011351.hg.1       | tydy                        |
| TC0400008664.hg.1       | PLK4                        |

|                              |                           |
|------------------------------|---------------------------|
| TC1200009673.hg.1            |                           |
| TC0600007610.hg.1            | MSH5; MSH5-SAPCD1; SAPCD1 |
| TC1700008819.hg.1            |                           |
| TC1100010418.hg.1            | KIF18A                    |
| TC1700012284.hg.1            |                           |
| TC0500012670.hg.1            | GABRB2                    |
| TC0500013096.hg.1            | rasloyby                  |
| TC0600011235.hg.1            | HIST1H2AM; HIST1H3J       |
| TC1800008170.hg.1            | AC006557.1                |
| TC0500007143.hg.1            | SKP2                      |
| TC1200011327.hg.1            | CSRP2                     |
| TC1200006767.hg.1            | OVOS                      |
| TC1700012380.hg.1            | SPAG5                     |
| TC1100008049.hg.1            | BANF1                     |
| TC2000007016.hg.1            | GINS1                     |
| TC1600008929.hg.1            |                           |
| TC0400007511.hg.1            | DANCR; MIR4449            |
| TC1600008890.hg.1            |                           |
| TC1100012743.hg.1            |                           |
| TC1500006785.hg.1            | ARHGAP11B; ARHGAP11A      |
| TC0700011969.hg.1            | MCM7                      |
| TCUn_KI270744v100006433.hg.1 | AC237676.1                |
| TC0500008054.hg.1            | POLR3G                    |
| TSUnmapped00000825.hg.1      | LINC01297                 |
| TC0500008544.hg.1            | LMNB1                     |
| TC1400008115.hg.1            | RP11-404P21.9             |
| TC0200014404.hg.1            | MCM6                      |
| TC0100015550.hg.1            | FAM72C                    |
| TC1500010311.hg.1            |                           |
| TC1200007641.hg.1            | SCN8A                     |
| TC1200011651.hg.1            |                           |
| TC0600011233.hg.1            | HIST1H3I                  |
| TC1700008626.hg.1            |                           |
| TC0500013145.hg.1            |                           |
| TC1900011759.hg.1            | APOC1                     |
| TC0500011669.hg.1            | GJA1P1                    |
| TC1700007501.hg.1            | RP11-640N20.4             |
| TC1200012699.hg.1            | CHPT1                     |
| TC0700012960.hg.1            | EZH2                      |
| TC1600011280.hg.1            |                           |
| TC0300006696.hg.1            | NR2C2                     |
| TC2200006641.hg.1            | RANBP1                    |

|                                  |                                                       |
|----------------------------------|-------------------------------------------------------|
| TC0100017562.hg.1                | RP4-566D2.1                                           |
| TC0400012644.hg.1                | SORBS2                                                |
| TC0100009479.hg.1                | DCLRE1B                                               |
| TC1200011722.hg.1                | PMCH                                                  |
| TC0900007129.hg.1                | MELK                                                  |
| TC1900010159.hg.1                | tertawbu                                              |
| TC1200009736.hg.1                | nawblabu                                              |
| TC0700012768.hg.1                |                                                       |
| TC2000009016.hg.1                | DSN1                                                  |
| TC2000006628.hg.1                | MCM8                                                  |
| TC2000006600.hg.1                | PCNA-AS1                                              |
| TC0400010649.hg.1                | RP11-1281K21.2                                        |
| TC1500007163.hg.1                | DUT                                                   |
| TC0600009381.hg.1                | CENPW                                                 |
| TC0900007740.hg.1                | RMI1                                                  |
| TC0200008830.hg.1                | LINC01123                                             |
| TC0600011134.hg.1                | HIST1H4D                                              |
| TC1000007081.hg.1                | PDSS1                                                 |
| TC1300007038.hg.1                |                                                       |
| TC0700011289.hg.1                |                                                       |
| TC1000006794.hg.1                | DHTKD1                                                |
| TC1500010612.hg.1                |                                                       |
| TC0100016891.hg.1                | KIF14                                                 |
| TC1900007972.hg.1                | sperwy                                                |
| TC1200007012.hg.1                | cheenar                                               |
| TC0600007566.hg.1                |                                                       |
| TC1700012389.hg.1                | LRR37A8P                                              |
| TC1200007979.hg.1                |                                                       |
| TC0100017094.hg.1                | FAM72A                                                |
| TC0700013119.hg.1                | XRCC2                                                 |
| TC1200012804.hg.1                | PRIM1                                                 |
| TC0300013740.hg.1                | gerstuby                                              |
| TC0700008001.hg.1                |                                                       |
| TC0500007665.hg.1                | CCNB1                                                 |
| TC1700011892.hg.1                | TK1                                                   |
| TC1100008008.hg.1                | POLA2                                                 |
| TCUn_GL000195v100006435.<br>hg.1 | LOC389831; TCONS_00030034; TCONS_00030035; AC011043.1 |
| TC0100009723.hg.1                | FAM72D                                                |
| TC0700012771.hg.1                | sworbler                                              |
| TC2000008318.hg.1                | FERMT1                                                |
| TC1600007235.hg.1                | PLK1                                                  |
| TC1500009345.hg.1                |                                                       |

|                              |                |
|------------------------------|----------------|
| TC0500008454.hg.1            | PRR16          |
| TC2200006461.hg.1            | LA16c-83F12.6  |
| TC1600009362.hg.1            | EMP2           |
| TC1900006727.hg.1            | UHRF1          |
| TC1200008005.hg.1            | RASSF3         |
| TCUn_GL000195v100006432.hg.1 | TCONS_00030032 |
| TC0400006538.hg.1            | TACC3          |
| TC0400007596.hg.1            | ARL9           |
| TC1300009016.hg.1            |                |
| TC0100012444.hg.1            |                |
| TC1700010472.hg.1            | smoywubu       |
| TC0900007845.hg.1            | plawtawbo      |
| TC0100015696.hg.1            | HIST2H2BF      |
| TC1500008252.hg.1            | FANCI          |
| TC1700007360.hg.1            | TMEM97         |
| TC0700011510.hg.1            | RFC2           |
| TC1500010291.hg.1            | NMB            |
| TC0400011721.hg.1            | MAD2L1         |
| TC1400010649.hg.1            | VRK1           |
| TC0400011748.hg.1            | CCNA2          |
| TC0100011365.hg.1            |                |
| TC0300011361.hg.1            | shoynubo       |
| TC0100009691.hg.1            | RP11-403I13.5  |
| TC1000012478.hg.1            | RP11-119K6.6   |
| TC0600009534.hg.1            | MYB            |
| TC0700007005.hg.1            | HOXA10-AS      |
| TC0600012038.hg.1            | MCM3           |
| TC1500008188.hg.1            | CTD-2262B20.1  |
| TC2200009018.hg.1            | swatey         |
| TC0300011278.hg.1            | FAM116A        |
| TC2200006986.hg.1            | blypey         |
| TC0300006575.hg.1            | FANCD2         |
| TC1700010299.hg.1            | CTD-2349P21.11 |
| TC0500007917.hg.1            | zustawby       |
| TC1100010690.hg.1            | klomaw         |
| TC0400009676.hg.1            |                |
| TC1600007884.hg.1            | RP11-44F14.10  |
| TC1900011760.hg.1            | APOC1P1        |
| TC0100017073.hg.1            | SLC45A3        |
| TC0600011143.hg.1            | HIST1H2APS4    |
| TC0600011228.hg.1            | HIST1H2AK      |
| TC0600011127.hg.1            | HIST1H1C       |

|                         |                       |
|-------------------------|-----------------------|
| TC1700007591.hg.1       | E2F3P1                |
| TC1200006561.hg.1       | RAD51AP1              |
| TC0400006994.hg.1       | NCAPG                 |
| TC1700011897.hg.1       |                       |
| TC1800008333.hg.1       | DHFR; DHFRP1          |
| TC1500006999.hg.1       | NUSAP1                |
| TC0300013447.hg.1       | RFC4                  |
| TC0700013290.hg.1       | NCAPG2                |
| TC1900011060.hg.1       | LIG1                  |
| TC1700010763.hg.1       | BRCA1                 |
| TC0300012883.hg.1       | snervawbo             |
| TC2000008917.hg.1       | loytar                |
| TC0300007138.hg.1       | koyfawbo              |
| TC0600007268.hg.1       | HIST1H4C              |
| TC1500010880.hg.1       | TIPIN                 |
| TC1000010686.hg.1       | ZWINT                 |
| TC0900009572.hg.1       | stershaw              |
| TC0700012508.hg.1       |                       |
| TSUnmapped00000627.hg.1 | KIF15                 |
| TC1700009828.hg.1       |                       |
| TC0100015544.hg.1       | HIST2H2BB; HIST2H3PS2 |
| TC0600007383.hg.1       | Z98744.3              |
| TC1200011330.hg.1       | E2F7                  |
| TC1200006452.hg.1       | RNU4ATAC16P           |
| TC1200010882.hg.1       | RP11-973D8.4          |
| TC0800007552.hg.1       | MCM4                  |
| TC1300010018.hg.1       |                       |
| TC0900006683.hg.1       | sweesper              |
| TC1100011687.hg.1       | RP11-111M22.3         |
| TC1200006627.hg.1       | NCAPD2                |
| TC1600011405.hg.1       | GINS3                 |
| TC1300008280.hg.1       | SKA3                  |
| TC0500009377.hg.1       | SPDL1                 |
| TC1200010277.hg.1       | OVOS2                 |
| TSUnmapped00000190.hg.1 | KIF15                 |
| TC0600011124.hg.1       | HIST1H3B              |
| TC0600012498.hg.1       | RP11-393I2.2          |
| TC1100012031.hg.1       |                       |
| TC0400009396.hg.1       | NEIL3                 |
| TC1200008010.hg.1       | gawflubu              |
| TC1400009248.hg.1       | DLGAP5                |
| TC0500010928.hg.1       | CENPK                 |
| TC1600008901.hg.1       | stuboby               |



|                   |                             |
|-------------------|-----------------------------|
| TC2200006954.hg.1 | HMGB1P10                    |
| TC1700009985.hg.1 | sluveebu                    |
| TC1000012496.hg.1 | AS3MT                       |
| TC2100007949.hg.1 | MIS18A                      |
| TC1200011096.hg.1 | buney                       |
| TC0100011871.hg.1 | HIST3H2BB                   |
| TC0800008726.hg.1 | TBC1D31                     |
| TC0500006472.hg.1 | TRIP13                      |
| TC0200011885.hg.1 | TTC32                       |
| TC0100017298.hg.1 |                             |
| TC1700010731.hg.1 | PSMC3IP                     |
| TC1600006880.hg.1 | RP11-27M24.1                |
| TC0100008150.hg.1 | RAD54L                      |
| TC1800007215.hg.1 | HAUS1                       |
| TC1700012199.hg.1 | PIGL                        |
| TC0700013289.hg.1 |                             |
| TC1600011292.hg.1 | FANCA                       |
| TC0300008868.hg.1 | rasmaby                     |
| TC1300007248.hg.1 | CKAP2                       |
| TC0900006684.hg.1 | veesaby                     |
| TC0300009337.hg.1 | SMC4                        |
| TC1300007236.hg.1 | FABP5P2                     |
| TC0100007216.hg.1 | nokumo                      |
| TC0400010750.hg.1 | NMU                         |
| TC1100012918.hg.1 |                             |
| TC1700010847.hg.1 | GJC1                        |
| TC2100007564.hg.1 | SLC25A15P4                  |
| TC0X00006888.hg.1 | CKS1BP6                     |
| TC0200008633.hg.1 |                             |
| TC1600007718.hg.1 | ORC6                        |
| TC0800007065.hg.1 | CDCA2                       |
| TC0600012631.hg.1 | MMS22L                      |
| TC0400007581.hg.1 |                             |
| TC0100007509.hg.1 | spamerbo                    |
| TC1100013111.hg.1 | CHEK1                       |
| TC1900009360.hg.1 | AC005339.2                  |
| TC1300006969.hg.1 | LOC101929140; RP11-74J13.8  |
| TC1400009128.hg.1 | CDKL1                       |
| TC0600011137.hg.1 | AL031777.1                  |
| TC1800006484.hg.1 | NDC80                       |
| TC2100006461.hg.1 | LOC100507412; CH507-513H4.1 |
| TC1500007392.hg.1 | CCNB2                       |
| TC0300010476.hg.1 | SGOL1                       |

|                              |                           |
|------------------------------|---------------------------|
| TC0200012713.hg.1            | BCL11A                    |
| TC1700008625.hg.1            | RP11-583F2.2              |
| TC0300008593.hg.1            | soyberbu                  |
| TC1800009289.hg.1            | ACAA2                     |
| TC1700006991.hg.1            | moda                      |
| TC0600010951.hg.1            | spersneybu                |
| TC1900009826.hg.1            | smertobu                  |
| TC0300006795.hg.1            | SGOL1-AS1                 |
| TC0800011679.hg.1            | ATAD2                     |
| TC0100009020.hg.1            | CDC7                      |
| TC0500007666.hg.1            | CENPH                     |
| TC0100018083.hg.1            | mimaha                    |
| TC1200007217.hg.1            |                           |
| TC0300011173.hg.1            | NT5DC2                    |
| TC1200008131.hg.1            | chuno                     |
| TC2100007487.hg.1            | Y_RNA                     |
| TC2100007504.hg.1            | Y_RNA                     |
| TCUn_GL000195v100006434.hg.1 | Y_RNA                     |
| TC1000012235.hg.1            | MKI67                     |
| TC0200012297.hg.1            | SRSF7                     |
| TC0300008702.hg.1            | MCM2                      |
| TC1500007549.hg.1            |                           |
| TC1200008544.hg.1            | NEDD1                     |
| TC0400008580.hg.1            |                           |
| TC1000008471.hg.1            | KIF11                     |
| TC1300008079.hg.1            |                           |
| TC0800007119.hg.1            | ESCO2                     |
| TC1200008113.hg.1            | NUP107                    |
| TC1200006510.hg.1            |                           |
| TSUnmapped00000642.hg.1      | AC254944.3                |
| TC0600007543.hg.1            | MDC1-AS1; XXbac-BPG27H4.7 |
| TC1900007587.hg.1            |                           |
| TC2200006465.hg.1            | LL22NC03-N64E9.1          |
| TC0100014543.hg.1            | DEPDC1                    |
| TC0200006977.hg.1            | CENPO                     |
| TC1500006938.hg.1            | RP11-133K1.11             |
| TC0200013878.hg.1            | BUB1                      |
| TC2000008279.hg.1            | PCNA                      |
| TC0400009037.hg.1            | MND1                      |
| TC1200007559.hg.1            | TROAP                     |
| TC1100010065.hg.1            | sermer                    |
| TC1200010795.hg.1            | RARG                      |

|                                         |                              |
|-----------------------------------------|------------------------------|
| TC1700011364.hg.1                       | BRIP1                        |
| TC0100011346.hg.1                       |                              |
| TC1700009627.hg.1                       | YBX2                         |
| TC0400009779.hg.1                       | Y_RNA                        |
| TC1800008233.hg.1                       |                              |
| TC1200007819.hg.1                       | CDK2                         |
| TC0500008309.hg.1                       | CAMK4                        |
| TC1200009621.hg.1                       | FOXM1                        |
| TC1200008134.hg.1                       | YEATS4                       |
| TC2100006510.hg.1                       |                              |
| TC1900011696.hg.1                       | CTD-2291D10.4                |
| TC0500011280.hg.1                       | DHFR                         |
| TC2100006477.hg.1                       | LOC100507412; CH507-528H12.1 |
| TC1100013165.hg.1                       | SLC43A3                      |
| TC1500009147.hg.1                       | torpor                       |
| TC0800009646.hg.1                       | farblorby                    |
| TC0700009861.hg.1                       |                              |
| TC0100015507.hg.1                       | HIST2H3DP1                   |
| TC2100006449.hg.1                       | CH507-254M2.3                |
| TC1900007498.hg.1                       |                              |
| TC0X00011353.hg.1                       | ASB9                         |
| TC0100015563.hg.1                       | plawmeybo                    |
| TC0400007714.hg.1                       |                              |
| TC1900007116.hg.1                       | gugly                        |
| TC1500007699.hg.1                       | KIF23                        |
| TC0600011379.hg.1                       | MDC1                         |
| TC1100011288.hg.1                       | MRPL11                       |
| TC0100011582.hg.1                       | gornubu                      |
| TC1700008066.hg.1                       | vuslaw                       |
| TC0100009702.hg.1                       | snuzeybo                     |
| TC0600011234.hg.1                       | HIST1H4L                     |
| TC0700006605.hg.1                       |                              |
| TC0900009418.hg.1                       | flupawbu                     |
| TC0500010515.hg.1                       | NUP155                       |
| TC1300006802.hg.1                       | BRCA2                        |
| TC1500010421.hg.1                       | RP11-617F23.1                |
| TC0500010655.hg.1                       |                              |
| TC0100014431.hg.1                       | DLEU2_6                      |
| TC0200016553.hg.1                       | DAPL1; OR7E89P               |
| TC0500010599.hg.1                       | OXCT1                        |
| TC0X00011365.hg.1                       | SSX5                         |
| TC17_GL000205v2_random00<br>006440.hg.1 | Y_RNA                        |

|                   |                                |
|-------------------|--------------------------------|
| TC2100007505.hg.1 | CH507-338C24.1                 |
| TC1500007077.hg.1 | WDR76                          |
| TC1900006628.hg.1 | NFIC                           |
| TC2200009288.hg.1 | TRMU                           |
| TC0200015093.hg.1 | ZNF385B                        |
| TC0100014880.hg.1 |                                |
| TC1500007781.hg.1 | zeyper                         |
| TC0100013369.hg.1 | STMN1; MIR3917                 |
| TC1700011469.hg.1 | RP11-927P21.12                 |
| TC0400007478.hg.1 | RP11-1281K21.8                 |
| TC1900010144.hg.1 | CTD-2561J22.5                  |
| TC1500010463.hg.1 | PRC1                           |
| TC0800011137.hg.1 | RAD54B; FSBP                   |
| TC2000009026.hg.1 | RBL1                           |
| TC0500013330.hg.1 |                                |
| TC0600011225.hg.1 | HIST1H2AJ                      |
| TC1100007995.hg.1 | CDCA5                          |
| TC0400012481.hg.1 |                                |
| TC1500006963.hg.1 | CASC5                          |
| TC0600011451.hg.1 | RNU6-850P                      |
| TC0100015701.hg.1 | HIST2H3A; HIST2H3C             |
| TC0600007266.hg.1 | HIST1H1C                       |
| TC1200012572.hg.1 | ITFG2                          |
| TC0300009975.hg.1 | flarnarbo                      |
| TC0600011917.hg.1 |                                |
| TC0800008120.hg.1 | LRRCC1                         |
| TC0700010497.hg.1 | SUMO2P14                       |
| TC0600013602.hg.1 | FBXO5                          |
| TC0800010980.hg.1 | RP11-98H4.4                    |
| TC0X00007180.hg.1 |                                |
| TC2200007130.hg.1 |                                |
| TC0300006964.hg.1 | nawfubo                        |
| TC2200009167.hg.1 |                                |
| TC1300008291.hg.1 | HIST1H2BPS3                    |
| TC0100012287.hg.1 |                                |
| TC0600012845.hg.1 |                                |
| TC1200012533.hg.1 | POLE                           |
| TC1500007829.hg.1 | LOXL1                          |
| TC0100013455.hg.1 | RPA2                           |
| TC2100007496.hg.1 | CH507-154B10.1; CH507-145C22.3 |
| TC2100006445.hg.1 | Y_RNA                          |
| TC2000007438.hg.1 | MYBL2                          |
| TC1700008438.hg.1 | RAD51C                         |

|                         |               |
|-------------------------|---------------|
| TC2000007089.hg.1       | TPX2          |
| TC0200007999.hg.1       | ZNF638        |
| TC1200007208.hg.1       | DDX11         |
| TC2100008307.hg.1       | stogu         |
| TC0100008057.hg.1       | CDC20         |
| TSUnmapped00000695.hg.1 | ARHGAP11A     |
| TC1700011012.hg.1       |               |
| TC1600007017.hg.1       | CTB-193M12.5  |
| TC1000008585.hg.1       | MARVELD1      |
| TC0700013162.hg.1       | PAXIP1        |
| TC1500009353.hg.1       | CEP152        |
| TC0700007804.hg.1       | SNORA63       |
| TC0400009856.hg.1       | LYAR          |
| TC1500006447.hg.1       | CHEK2P2       |
| TC0200010484.hg.1       | gaklu         |
| TC1600010592.hg.1       |               |
| TC0400009181.hg.1       | RP11-218F10.3 |
| TC1700009888.hg.1       | CENPV         |
| TC0400009683.hg.1       | AC092574.2    |
| TC0100011581.hg.1       | CENPF         |
| TC0100007045.hg.1       | snurawbo      |
| TC1700009484.hg.1       | RP11-235E17.4 |
| TC0X00009606.hg.1       | SSX3          |
| TC1600008924.hg.1       | POLR3K        |
| TC1100012030.hg.1       | werchee       |
| TC0300006720.hg.1       |               |
| TC1600007177.hg.1       | leypo         |
| TC1100012948.hg.1       | IFITM2        |
| TC0700007198.hg.1       | ANLN          |
| TC0100015705.hg.1       |               |
| TC0100016441.hg.1       | CENPL         |
| TC0100006443.hg.1       | storubu       |
| TC1700010451.hg.1       | RDM1          |
| TC2200007838.hg.1       | AC116618.1    |
| TC1000012564.hg.1       | DNAJC9        |
| TC1100009657.hg.1       | IFITM3        |
| TC0300009524.hg.1       | ECT2          |
| TC0700007349.hg.1       | stawblar      |
| TC1100013021.hg.1       | FEN1          |
| TC1400009242.hg.1       | WDHD1         |
| TC0100009877.hg.1       | HIST2H3A      |
| TC1600010591.hg.1       |               |
| TC1500009934.hg.1       | RP11-673C5.1  |

|                   |                       |
|-------------------|-----------------------|
| TC1300006847.hg.1 | RFC3                  |
| TC0100010397.hg.1 | NUF2                  |
| TC0100008023.hg.1 | PPIH                  |
| TC0600011185.hg.1 | HIST1H2BK             |
| TC0500010514.hg.1 | CTD-2124B8.2          |
| TC1600009922.hg.1 |                       |
| TC1000008482.hg.1 | CEP55                 |
| TC1100012513.hg.1 | H2AFX                 |
| TC1000008385.hg.1 | STAMBPL1              |
| TC0900006736.hg.1 | CNTLN                 |
| TC1700009204.hg.1 | RP11-498C9.16         |
| TC1400007173.hg.1 | RP11-589M4.1; tawwobo |
| TC0400012620.hg.1 | CENPU                 |
| TC1700012265.hg.1 | MEIOC                 |
| TC0600007380.hg.1 | HIST1H2AL; HIST1H2BN  |
| TC2200008847.hg.1 | CENPM                 |
| TC0100013426.hg.1 | snoymerbo             |
| TC0200007558.hg.1 | AC007682.2            |

Supplementary Table 3. List of genes  $\geq 2$ -fold elevated in control shRNA vs. ELK1 shRNA

| Control shRNA vs. ELK1 shRNA |                           |
|------------------------------|---------------------------|
| ID                           | GeneID                    |
| TC0400012955.hg.1            |                           |
| TC1900006896.hg.1            | HNRNPM                    |
| TC0X00010382.hg.1            | BEX5                      |
| TC0400012956.hg.1            | ELOVL6                    |
| TC0100014806.hg.1            | 15-Sep                    |
| TC1900011641.hg.1            | OAZ1                      |
| TC1300006641.hg.1            | NUP58                     |
| TC0300012236.hg.1            | MUC13                     |
| TC0200009487.hg.1            | SPOPL                     |
| TC1500008615.hg.1            |                           |
| TC0300008565.hg.1            | LOC100129550; RP11-67L2.2 |
| TC0Y00007159.hg.1            | RP11-424G14.1             |
| TC0500011984.hg.1            | HINT1                     |
| TC0600009059.hg.1            | FOXO3                     |
| TC1100007227.hg.1            | HIPK3                     |
| TC0200014616.hg.1            |                           |
| TC0600009797.hg.1            |                           |
| TC0100013634.hg.1            | TMEM54                    |
| TC0100014522.hg.1            | GNG12                     |
| TC1200012629.hg.1            | DAZAP2                    |
| TC0300013058.hg.1            | GOLIM4                    |
| TC0700010015.hg.1            | INTS1                     |
| TC0X00009760.hg.1            | SMC1A                     |
| TC0200015144.hg.1            | norkla                    |
| TC1600006833.hg.1            | RP11-77H9.5               |
| TC1900007115.hg.1            | NFIX                      |
| TC0600007901.hg.1            | sneykleebu                |
| TC1200010248.hg.1            | RP11-996F15.5             |
| TC1700010201.hg.1            | RP11-192H23.8             |
| TC0800007004.hg.1            | RHOBTB2                   |
| TC0500013109.hg.1            | ZFP62                     |
| TC1200012658.hg.1            |                           |
| TC1100010520.hg.1            |                           |
| TC1200008814.hg.1            | ANKRD13A                  |
| TC0200012607.hg.1            | MIR3682                   |
| TC0X00008662.hg.1            | RP5-824H1.1               |
| TC1900011310.hg.1            | CTD-3099C6.9              |
| TC0800011566.hg.1            | RAD21                     |
| TC1900007954.hg.1            | chysey                    |

|                   |                                    |
|-------------------|------------------------------------|
| TC2100007318.hg.1 | RRP1B                              |
| TC1000012324.hg.1 |                                    |
| TC0400011525.hg.1 | barglu                             |
| TC1900007005.hg.1 | SMARCA4                            |
| TC1900009129.hg.1 | AC011558.5                         |
| TC0200016232.hg.1 |                                    |
| TC0700013614.hg.1 | AC000123.3; AC000123.2; slorblarby |
| TC1100008408.hg.1 | vumeeby                            |
| TC1900008824.hg.1 | MYADM                              |
| TC0X00010509.hg.1 | GNG5P2                             |
| TC0100011358.hg.1 | LOC103021295                       |
| TC0500010461.hg.1 |                                    |
| TC1200007138.hg.1 | RP11-421F16.3                      |
| TC1100010529.hg.1 |                                    |
| TC1600010712.hg.1 | hawaru                             |
| TC1200012787.hg.1 | PUS7L                              |
| TC1900011551.hg.1 | blawsaw                            |
| TC0300010371.hg.1 | snawspawby                         |
| TC1500008171.hg.1 | sochabu                            |
| TC0800008723.hg.1 | sneyskerbu                         |
| TC1000007701.hg.1 | TFAM                               |
| TC1100009864.hg.1 | RHOG                               |
| TC1200007598.hg.1 | plyflo                             |
| TC0600006929.hg.1 | peyglebybu                         |
| TC0100017765.hg.1 | smorby                             |
| TC0500012227.hg.1 |                                    |
| TC0100017623.hg.1 |                                    |
| TC0700008102.hg.1 | lerblaby                           |
| TC0300007067.hg.1 | MYD88                              |
| TC0100007486.hg.1 | SFN                                |
| TC0500009741.hg.1 |                                    |
| TC1200006455.hg.1 |                                    |
| TC0400012824.hg.1 | HERC3                              |
| TC0400006433.hg.1 | ZNF595                             |
| TC1400009549.hg.1 |                                    |
| TC1900007181.hg.1 | TECR; MIR639                       |
| TC1700008089.hg.1 | barwee                             |
| TC1200007560.hg.1 | DNAJC22                            |
| TC0500008064.hg.1 |                                    |
| TC0900012047.hg.1 |                                    |
| TC0500012373.hg.1 | basteyby                           |
| TC1900009545.hg.1 |                                    |
| TC1200012187.hg.1 | steybleebu                         |



|                   |               |
|-------------------|---------------|
| TC1100010538.hg.1 |               |
| TC1000010102.hg.1 | joymorby      |
| TC0900008949.hg.1 | NCS1          |
| TC1500009146.hg.1 |               |
| TC0700012531.hg.1 |               |
| TC0500011255.hg.1 | MTX3          |
| TC1000009173.hg.1 |               |
| TC0400009734.hg.1 |               |
| TC2100006600.hg.1 | AF127577.10   |
| TC0600009448.hg.1 | larpleybu     |
| TC0100015629.hg.1 | FMO5          |
| TC2100008066.hg.1 |               |
| TC0400006519.hg.1 | CRIPAK        |
| TC1900009267.hg.1 |               |
| TC2200007828.hg.1 | RPL23AP82     |
| TC0800010663.hg.1 | ARMC1         |
| TC0900009645.hg.1 | HAUS6         |
| TC1900009709.hg.1 |               |
| TC0400011506.hg.1 | perglu        |
| TC0500007868.hg.1 | SCAMP1        |
| TC1100009038.hg.1 | GNG5P3        |
| TC0600007514.hg.1 | nusawby       |
| TC0X00010626.hg.1 |               |
| TC0100010389.hg.1 | HSD17B7       |
| TC0100006806.hg.1 | UBE4B         |
| TC0200013317.hg.1 |               |
| TC1700008419.hg.1 | RP11-159D12.8 |
| TC0100013353.hg.1 |               |
| TC0800007535.hg.1 | shuchorby     |
| TC1900009931.hg.1 | CTC-429P9.3   |
| TC0300007887.hg.1 |               |
| TC0500010421.hg.1 | storflar      |
| TC1600009566.hg.1 | jeewoy        |
| TC1200011473.hg.1 | RP11-734K2.3  |
| TC1900007288.hg.1 | CTC-429P9.1   |
| TC1800007523.hg.1 | PHLPP1        |
| TC1200007267.hg.1 | torire        |
| TC2200006987.hg.1 | blypey        |
| TC2200008106.hg.1 | stawfy        |
| TC0200012990.hg.1 | woklar        |
| TC0900009912.hg.1 | SIGMAR1       |
| TC0100011728.hg.1 |               |
| TC0100011953.hg.1 | ARV1          |

|                   |                          |
|-------------------|--------------------------|
| TC0600013874.hg.1 | GNG5P1                   |
| TC0700011908.hg.1 | tawshorby                |
| TC0100016173.hg.1 | CFAP126                  |
| TC0200013493.hg.1 |                          |
| TC0X00011200.hg.1 |                          |
| TC1700009963.hg.1 |                          |
| TC0700011925.hg.1 |                          |
| TC0400012051.hg.1 | tabeebo                  |
| TC0200013278.hg.1 | GGCX                     |
| TC1600009865.hg.1 | NUPR1                    |
| TC0700008484.hg.1 | reenawby                 |
| TC0900007031.hg.1 | RP11-571F15.2            |
| TC1200009078.hg.1 | RP11-131L12.3            |
| TC1900010355.hg.1 | skartey                  |
| TC0100010286.hg.1 | skerler                  |
| TC2100007078.hg.1 |                          |
| TC1700010782.hg.1 | titari                   |
| TC1100012418.hg.1 | BUD13                    |
| TC2000009956.hg.1 | PCMTD2                   |
| TC1000012555.hg.1 | LOC399753; wapoyby       |
| TC1900007329.hg.1 | PGLS                     |
| TC1400007281.hg.1 |                          |
| TC0800007027.hg.1 | SLC25A37                 |
| TC1000011005.hg.1 | P4HA1                    |
| TC1200012145.hg.1 | RAB35                    |
| TC1200008908.hg.1 | jabyby                   |
| TC0100013202.hg.1 | zulorbu                  |
| TC0100011770.hg.1 | EPHX1                    |
| TC1700012260.hg.1 | COASY                    |
| TC1800008517.hg.1 | stersu                   |
| TC0800006663.hg.1 | ERI1                     |
| TC1400009157.hg.1 |                          |
| TC0200009687.hg.1 | ARL6IP6                  |
| TC0X00007285.hg.1 | XAGE1B; XAGE1E           |
| TC0300012540.hg.1 | weydybu                  |
| TC0700010679.hg.1 | sularby                  |
| TC1500007459.hg.1 |                          |
| TC1500006818.hg.1 | EMC4                     |
| TC2200007982.hg.1 | UFD1L                    |
| TC1900010555.hg.1 | LOC284412; CTD-3220F14.1 |
| TC1900009820.hg.1 | DDX39A                   |
| TC0600011374.hg.1 |                          |
| TC0100010125.hg.1 | RNU6-1297P               |

|                   |               |
|-------------------|---------------|
| TC0X00008060.hg.1 |               |
| TC0100018562.hg.1 | AIDA          |
| TC0200008421.hg.1 |               |
| TC0100014752.hg.1 | GNG5          |
| TC0800011629.hg.1 |               |
| TC1700011370.hg.1 | slosa         |
| TC1100011105.hg.1 | RNU6-118P     |
| TC0200013083.hg.1 |               |
| TC0300012553.hg.1 | glardybu      |
| TC1500009623.hg.1 | BNIP2         |
| TC1100009817.hg.1 | PHLDA2        |
| TC1000007639.hg.1 |               |
| TC1200007162.hg.1 | Y_RNA         |
| TC2000008751.hg.1 |               |
| TC1000011485.hg.1 | PDLIM1        |
| TC1800008580.hg.1 | PSTPIP2       |
| TC0200008666.hg.1 | IL1R1         |
| TC0200013359.hg.1 | snukerbu      |
| TC1700011454.hg.1 | satama        |
| TC1600009747.hg.1 |               |
| TC0200008031.hg.1 | SPR           |
| TC2000009886.hg.1 | PANK2         |
| TC0200014904.hg.1 |               |
| TC1500010945.hg.1 | LINS1         |
| TC0900006611.hg.1 | skerpoybu     |
| TC1900009227.hg.1 | LSM7          |
| TC0600006930.hg.1 | koyjar        |
| TC1200012499.hg.1 | tuflobu       |
| TC0100006755.hg.1 | ENO1          |
| TC1200007233.hg.1 |               |
| TC0200015740.hg.1 | snogarbu      |
| TC1900010160.hg.1 | vytawbu       |
| TC0800007114.hg.1 | SCARA3        |
| TC1900011357.hg.1 |               |
| TC1100006480.hg.1 |               |
| TC0600008655.hg.1 | TPBG          |
| TC0200016578.hg.1 | NUP35         |
| TC0700012094.hg.1 | derskarby     |
| TC0Y00006526.hg.1 | RP11-115H13.1 |
| TC1600007454.hg.1 | pluner        |
| TC1200006825.hg.1 |               |
| TC1200009725.hg.1 | dageyby       |
| TC1600010884.hg.1 | roraru        |

|                   |                        |
|-------------------|------------------------|
| TC1900008689.hg.1 | PPP2R1A                |
| TC1500006967.hg.1 | GCHFR                  |
| TC1900006528.hg.1 | NDUFS7                 |
| TC1700006761.hg.1 |                        |
| TC1900006994.hg.1 | DNM2                   |
| TC1200009726.hg.1 | swawchu                |
| TC1900010157.hg.1 | VN1R84P                |
| TC0800009882.hg.1 |                        |
| TC0X00009982.hg.1 |                        |
| TC1800006748.hg.1 | SEH1L                  |
| TC1800008412.hg.1 |                        |
| TC0800010524.hg.1 | IMPAD1                 |
| TC1400006513.hg.1 | PARP2                  |
| TC1700011738.hg.1 | RP11-649A18.5          |
| TC0800008916.hg.1 | EFR3A                  |
| TC0X00007216.hg.1 |                        |
| TC2200008264.hg.1 |                        |
| TC0100009961.hg.1 | spawbee                |
| TC1200010871.hg.1 | styjoyby               |
| TC1500007667.hg.1 | rorsoy                 |
| TC1500009962.hg.1 | sweyzorbu              |
| TC1400008839.hg.1 | warslar                |
| TC1800008033.hg.1 | RNU2-27P               |
| TC2200008856.hg.1 | NAGA                   |
| TC1900009635.hg.1 | RNU7-140P              |
| TC2000007294.hg.1 | CTNNB1                 |
| TC0200013352.hg.1 | slarder                |
| TC0300011764.hg.1 |                        |
| TC0400011245.hg.1 | TECRP1                 |
| TC0700012634.hg.1 | gloybler               |
| TC0200016775.hg.1 | ATG9A                  |
| TC0400011934.hg.1 | sheega                 |
| TC0100016112.hg.1 | TAGLN2                 |
| TC1100013091.hg.1 | SDHD                   |
| TC1600009699.hg.1 | RP11-141O15.1; shosmer |
| TC0400011108.hg.1 | CNOT6L                 |
| TC0200016679.hg.1 | SERTAD2                |
| TC1100008451.hg.1 | flawchor               |
| TC1700010250.hg.1 | beesa                  |
| TC0200008857.hg.1 | chorkler               |
| TC0200008920.hg.1 | doyklee                |
| TC0100017948.hg.1 | CHML                   |
| TC1900010202.hg.1 |                        |

|                   |                                           |
|-------------------|-------------------------------------------|
| TC0100009947.hg.1 | nakoybu                                   |
| TC0400010186.hg.1 |                                           |
| TC1700008711.hg.1 | sworsma                                   |
| TC0300012197.hg.1 |                                           |
| TC0800007769.hg.1 | vargee                                    |
| TC0300009998.hg.1 | RNU7-18P                                  |
| TC0700008129.hg.1 | plashawby                                 |
| TC0600008780.hg.1 | CASP8AP2                                  |
| TC0100010543.hg.1 | ATP1B1                                    |
| TC0500011410.hg.1 | RNA5SP187                                 |
| TC1100008505.hg.1 | EMSY                                      |
| TC0100016958.hg.1 | SNORA70                                   |
| TC1900009828.hg.1 | NDUFB7                                    |
| TC0800007871.hg.1 | RNA5SP268                                 |
| TC0600013123.hg.1 | RP11-325O24.1                             |
| TC0500011209.hg.1 |                                           |
| TC1200009239.hg.1 | KMT5A                                     |
| TC0600012132.hg.1 | RAB23                                     |
| TC2100008483.hg.1 |                                           |
| TC2200008473.hg.1 | Y_RNA                                     |
| TC1800009139.hg.1 | RP11-671C19.2                             |
| TC1700010940.hg.1 |                                           |
| TC0100013390.hg.1 |                                           |
| TC1000008475.hg.1 | EXOC6                                     |
| TC1100008394.hg.1 |                                           |
| TC0200008468.hg.1 | FAHD2A                                    |
| TC1900010223.hg.1 | BNIP3P39                                  |
| TC0700009339.hg.1 | beebley                                   |
| TC0100018379.hg.1 | LOC100132287; LOC100132062; RP4-669L17.10 |
| TC1100009210.hg.1 | ARCN1                                     |
| TC0400009716.hg.1 |                                           |
| TC0200010431.hg.1 | NIF3L1                                    |
| TC1200012541.hg.1 |                                           |
| TC0800009738.hg.1 | MIR548V                                   |
| TC0800009512.hg.1 | plybla                                    |
| TC0100017004.hg.1 |                                           |
| TC1000010505.hg.1 | fleenawbu                                 |
| TC1200010621.hg.1 |                                           |
| TC0500008832.hg.1 | rawsnobu                                  |
| TC1600006533.hg.1 | UBE2I                                     |
| TC0400007594.hg.1 | poskoby                                   |
| TC0400010745.hg.1 | CLOCK                                     |
| TC1100011391.hg.1 | vamey                                     |

|                   |                        |
|-------------------|------------------------|
| TC0300007485.hg.1 | SMIM4                  |
| TC0600013353.hg.1 | sparfla                |
| TC0X00010268.hg.1 | teybaw                 |
| TC0100009844.hg.1 | stukler                |
| TC0X00008073.hg.1 | PRPS1                  |
| TC1300007052.hg.1 | GTF2F2                 |
| TC0100010267.hg.1 | DUSP23                 |
| TC1100010692.hg.1 | AC024475.1             |
| TC1600006739.hg.1 | RP11-295D4.4; steesnor |
| TC2000010006.hg.1 | EIF6                   |
| TC0X00011125.hg.1 | MAGEA10andMAGEA5       |
| TC0800009506.hg.1 | RP11-556O5.6           |
| TC1600009777.hg.1 | ARHGAP17               |
| TC1400007172.hg.1 | STYX                   |
| TC1200011936.hg.1 | ATXN2                  |
| TC0500010169.hg.1 | ANKH                   |
| TC1600007143.hg.1 | LYRM1                  |
| TC0400007563.hg.1 | nesiyu                 |
| TC1500007199.hg.1 | GABPB1-AS1; MIR4712    |
| TC1000008527.hg.1 |                        |
| TC0X00006758.hg.1 | CNKSR2                 |
| TC1300009022.hg.1 |                        |
| TC2000009196.hg.1 | SERINC3                |
| TC0600012504.hg.1 |                        |
| TC0300010787.hg.1 | snyfarbo               |
| TC1000011848.hg.1 | leymu                  |
| TC1400008986.hg.1 |                        |
| TC1100010747.hg.1 | gawny                  |
| TC1200009584.hg.1 | RP11-288K12.1          |
| TC0900009450.hg.1 |                        |
| TC0700011008.hg.1 |                        |
| TC1000009527.hg.1 | LARP4B                 |
| TC1200010319.hg.1 | mushoby                |
| TC1100008988.hg.1 |                        |
| TC0100015230.hg.1 | snypeebeu              |
| TC0400007495.hg.1 | DCUN1D4                |
| TC1000008193.hg.1 | PPIF                   |
| TC2200008923.hg.1 | Z97055.1               |
| TC0300009031.hg.1 | spodobu                |
| TC1800008235.hg.1 | ABHD3                  |
| TC0900007668.hg.1 | loytarbu               |
| TC0100015056.hg.1 |                        |
| TC0300007494.hg.1 | moykubo                |

|                                   |               |
|-----------------------------------|---------------|
| TC0500008308.hg.1                 | WDR36         |
| TC1_KI270706v1_random0006433.hg.1 | gleyrobo      |
| TC2000009127.hg.1                 |               |
| TC0100013783.hg.1                 | stovorbo      |
| TC0400010784.hg.1                 | NOA1          |
| TC1900009198.hg.1                 | BTBD2         |
| TC0800011372.hg.1                 | SLC25A32      |
| TC0300010360.hg.1                 |               |
| TC0300009164.hg.1                 | klardorbu     |
| TC0X00009998.hg.1                 |               |
| TC1500008841.hg.1                 | TJP1          |
| TC0800009988.hg.1                 | INTS9         |
| TC0400007024.hg.1                 |               |
| TC0700013109.hg.1                 | wahira        |
| TC1000012580.hg.1                 | ARHGAP19      |
| TC0500010869.hg.1                 | ELOVL7        |
| TC1700012315.hg.1                 | SLC25A10      |
| TC1700012246.hg.1                 | STARD3        |
| TC2100007590.hg.1                 |               |
| TC0200010506.hg.1                 |               |
| TC1800008133.hg.1                 | RP11-773H22.4 |
| TC0400008604.hg.1                 | EXOSC9        |
| TC0200008103.hg.1                 | POLE4         |
| TC2200008855.hg.1                 | feychor       |
| TC0600012630.hg.1                 |               |
| TC1900008548.hg.1                 |               |
| TC0700008099.hg.1                 | spoyskuby     |
| TC1400009834.hg.1                 | GTF2A1        |
| TC2100008286.hg.1                 | U2AF1         |
| TC0100008492.hg.1                 | PHBP3         |
| TC0200011695.hg.1                 |               |
| TC0500011993.hg.1                 | sheystorby    |
| TC1500006996.hg.1                 | OIP5-AS1      |
| TC1200011916.hg.1                 | PPP1CC        |
| TC1200012283.hg.1                 |               |
| TC0100012497.hg.1                 | GNB1          |
| TC1700009205.hg.1                 |               |
| TC1700012078.hg.1                 | ALYREF        |
| TC1100009983.hg.1                 | MRPL17        |
| TC1200009628.hg.1                 |               |
| TC0300006605.hg.1                 | ATG7          |
| TC1000012328.hg.1                 |               |

|                   |                        |
|-------------------|------------------------|
| TC1500010886.hg.1 | CALML4                 |
| TC1900010511.hg.1 | POLR2I                 |
| TC0300006943.hg.1 | sworjeebo              |
| TC0200007030.hg.1 |                        |
| TC0700007137.hg.1 | BBS9                   |
| TC0100015556.hg.1 | LOC645166; RP11-14N7.2 |
| TC0700010167.hg.1 | ACTB                   |
| TC1500007995.hg.1 | AC069082.1             |
| TC0200011799.hg.1 |                        |
| TC0300006786.hg.1 | dadoybo                |
| TC1500007097.hg.1 | B2M                    |
| TC0600011848.hg.1 |                        |
| TC0400011395.hg.1 | EIF4E                  |
| TC0500011768.hg.1 | CTD-2287O16.5          |
| TC1900007340.hg.1 | MAP1S                  |
| TC0500008433.hg.1 | luky                   |
| TC0300006677.hg.1 | SLC6A6                 |
| TC1500006678.hg.1 | flychobu               |
| TC0600006931.hg.1 | lajar                  |
| TC0300008686.hg.1 | CHCHD6                 |
| TC1100008450.hg.1 | glermeeby              |
| TC1200010901.hg.1 | RNF41                  |
| TC0900006704.hg.1 |                        |
| TC0100017208.hg.1 |                        |
| TC0100014217.hg.1 | pormubo                |
| TC0400007489.hg.1 | RP11-241F15.10         |
| TC2200008601.hg.1 |                        |
| TC0300007164.hg.1 | SS18L2                 |
| TC0100015059.hg.1 | spoyber                |
| TC2000010005.hg.1 | MMP24-AS1              |
| TC1200010452.hg.1 | sweycho                |
| TC1000011507.hg.1 | weymy                  |
| TC0100016323.hg.1 |                        |
| TC0500013398.hg.1 | SLC2A3P1               |
| TC1600009894.hg.1 |                        |
| TC1000006976.hg.1 | skeefor                |
| TC0200008419.hg.1 | RP11-575H3.1           |
| TC1600011362.hg.1 | ACSM3                  |
| TC0300013989.hg.1 | ABHD14B                |
| TC1200012203.hg.1 | dyblerbu               |
| TC1400010341.hg.1 | AL136001.1             |
| TC0300013676.hg.1 | RP11-480A16.1          |
| TC0700010146.hg.1 |                        |



|                   |                         |
|-------------------|-------------------------|
| TC1800008308.hg.1 | feywo                   |
| TC0600008899.hg.1 |                         |
| TC0700008181.hg.1 | GNAI1                   |
| TC1900009423.hg.1 | nawzoy                  |
| TC0Y00006763.hg.1 | RBM1F; RBM2FP; RBM1J    |
| TC1200007620.hg.1 | Y_RNA                   |
| TC0400011962.hg.1 | choysneyby              |
| TC1500009176.hg.1 | fysu                    |
| TC0900011037.hg.1 | AL591377.1              |
| TC1700010340.hg.1 | AC116407.1              |
| TC0400012245.hg.1 | FAM198B                 |
| TC1700011740.hg.1 | blawfloy; RP11-649A18.4 |
| TC0M00006447.hg.1 | MT-TA; MT-TN            |
| TC1500008616.hg.1 | HERC2P3                 |
| TC0800011105.hg.1 | TRIQK                   |
| TC0300012444.hg.1 | RP11-517B11.7           |
| TC0X00007151.hg.1 | vawdee                  |
| TC0X00010583.hg.1 | porgar                  |
| TC1500009111.hg.1 | vyzawbu                 |
| TC1700010893.hg.1 |                         |
| TC0800010662.hg.1 | CTD-3025N20.3           |
| TC0200010966.hg.1 | RHBDD1                  |
| TC1900011851.hg.1 | NDUFA11                 |
| TC1500009443.hg.1 | RP11-56B16.4            |
| TC1700009651.hg.1 | TP53                    |
| TC0300008185.hg.1 | jubabu                  |
| TC2100008100.hg.1 |                         |
| TC0900009951.hg.1 | plartyby                |
| TC0X00011399.hg.1 | FAM127B                 |
| TC0100011177.hg.1 | smarplu                 |
| TC1700007004.hg.1 | paveebu                 |
| TC1200009980.hg.1 | GPRC5D                  |
| TC1500009964.hg.1 |                         |
| TC1200010682.hg.1 | Y_RNA                   |
| TC1300009013.hg.1 | VPS36                   |
| TC1100008652.hg.1 | TMEM126A                |
| TC1200009735.hg.1 | MRPL51                  |
| TC1700008205.hg.1 | RP11-1079K10.4          |
| TC0300008472.hg.1 | tisore                  |
| TC0200007115.hg.1 | CLIP4                   |
| TC0200008663.hg.1 | IL1R2                   |
| TC0400008587.hg.1 |                         |
| TC2100007073.hg.1 | AP001429.1              |

|                   |                      |
|-------------------|----------------------|
| TC0300012248.hg.1 | meybeybu             |
| TC0400011414.hg.1 | TRMT10A              |
| TC2100007492.hg.1 | U2AF1                |
| TC0600011408.hg.1 |                      |
| TC0400011117.hg.1 | pawspubu             |
| TC0900012218.hg.1 | KLHL9                |
| TC0700007025.hg.1 | yamora               |
| TC1700008071.hg.1 |                      |
| TC2000008865.hg.1 | RP5-1085F17.4; jatar |
| TC0400006460.hg.1 |                      |
| TC0700006634.hg.1 | AIMP2                |
| TC0600007988.hg.1 | swyspabu             |
| TC1400007752.hg.1 | GSTZ1                |
| TC1900011883.hg.1 | ZNF799               |
| TC0700013395.hg.1 | GTPBP10              |
| TC0X00010881.hg.1 | klawvo               |
| TC1600010795.hg.1 | SNORD71              |
| TC0700007745.hg.1 | RP11-340I6.6         |
| TC0900007188.hg.1 |                      |
| TC0900011468.hg.1 | kleepplerbu          |
| TC1900011861.hg.1 | S1PR2                |
| TC0500010656.hg.1 |                      |
| TC0300011595.hg.1 |                      |
| TC0X00007197.hg.1 | VN1R110P             |
| TC1600010604.hg.1 | FAM96B               |
| TC1200009580.hg.1 | FBXL14               |
| TC1500007883.hg.1 | COMMD4               |
| TC1900011752.hg.1 | ZNF223               |
| TC0300006847.hg.1 | NR1D2                |
| TC0600011164.hg.1 |                      |
| TC0800008243.hg.1 | PDP1                 |
| TC0800012391.hg.1 | RP11-242F4.2         |
| TC1400009127.hg.1 | RP11-247L20.4        |
| TC0X00008405.hg.1 | RBMX2                |
| TC0Y00007283.hg.1 | PARP4P1              |
| TC0700009589.hg.1 |                      |
| TC1100011845.hg.1 | jerglerbu            |
| TC1000008347.hg.1 | taklarbu             |
| TC1700010490.hg.1 | HMGB1P24             |
| TC0700012132.hg.1 | snawskawby           |
| TC2000009197.hg.1 | zagey                |
| TC0300008839.hg.1 | ACPP                 |
| TC0800010260.hg.1 | klerwerby            |

|                         |               |
|-------------------------|---------------|
| TC1000011336.hg.1       | reypoby       |
| TC1400009902.hg.1       |               |
| TC1000007346.hg.1       | HSD17B7P2     |
| TC1900009805.hg.1       | SAMD1         |
| TC0800007554.hg.1       | UBE2V2        |
| TC1300006683.hg.1       | GTF3A         |
| TC1200009525.hg.1       |               |
| TC1700009515.hg.1       | MYBBP1A       |
| TC0200012011.hg.1       | notamo        |
| TC1100008012.hg.1       | DPF2          |
| TC0300010296.hg.1       | RNA5SP123     |
| TC1600008167.hg.1       | glawoy        |
| TC0X00009202.hg.1       | zerjoy        |
| TC1700011456.hg.1       | satama        |
| TC1200008709.hg.1       | bojeeby       |
| TC0600010057.hg.1       | ACAT2         |
| TC1400008983.hg.1       |               |
| TC1700012349.hg.1       | NAA38         |
| TC0600013523.hg.1       | PPIL4         |
| TC2100006957.hg.1       | bymer         |
| TC0200013507.hg.1       | GPAT2         |
| TC1500008744.hg.1       | RP11-701H24.3 |
| TC1300009336.hg.1       |               |
| TC1700010701.hg.1       | DNAJC7        |
| TC1300010025.hg.1       | RNF6          |
| TC1600009626.hg.1       | flypu         |
| TC0600011361.hg.1       | HCG18; HCG17  |
| TC0100010795.hg.1       | choylobu      |
| TSUnmapped00000054.hg.1 | ZNF780B       |
| TSUnmapped00000177.hg.1 | ZNF780B       |
| TC0500008232.hg.1       | PPIP5K2       |
| TC0400011920.hg.1       | SLC7A11       |
| TC0800007681.hg.1       | TGS1          |
| TC1600007159.hg.1       | swoywerbu     |
| TC0200007665.hg.1       | jordubu       |
| TC0X00008133.hg.1       | snodu         |
| TC0200015743.hg.1       |               |
| TC1700008181.hg.1       | terslee       |
| TC0600010342.hg.1       |               |
| TC1200012202.hg.1       | ANAPC5        |
| TC0700010504.hg.1       | OSBPL3        |
| TC0900008246.hg.1       | SNORA31       |
| TC0X00007408.hg.1       |               |

|                   |                |
|-------------------|----------------|
| TC1900007481.hg.1 |                |
| TC1100010606.hg.1 |                |
| TC0X00007403.hg.1 | beetoy         |
| TC0300010209.hg.1 | TADA3          |
| TC1100007992.hg.1 | SAC3D1         |
| TC0100008752.hg.1 | TYW3           |
| TC1600011568.hg.1 | TMEM231        |
| TC0400007712.hg.1 | beegly         |
| TC0400006549.hg.1 | SCARNA22       |
| TC1900011358.hg.1 |                |
| TC1800006642.hg.1 | RP11-61L19.3   |
| TC0800011565.hg.1 | RAD21; MIR3610 |
| TC1200012612.hg.1 | MED21          |
| TC1200011539.hg.1 |                |
| TC1900007423.hg.1 | smusoy         |
| TC2200008860.hg.1 | RP1-257I20.14  |
| TC1100012353.hg.1 | ZW10           |
| TC0200007035.hg.1 | EPT1           |
| TC0700011471.hg.1 | SPDYE7P        |
| TC0200012988.hg.1 | wuklar         |
| TC0100007267.hg.1 | LINC00339      |
| TC0100007401.hg.1 | RP3-469D22.1   |
| TC2200008558.hg.1 | LINC01399      |
| TC0100010058.hg.1 | CREB3L4        |
| TC1700008073.hg.1 | RP11-707O23.1  |
| TC0900010882.hg.1 | goylar         |
| TC0100009101.hg.1 | ABCD3          |
| TC1100009293.hg.1 | 7SK            |
| TC0600010730.hg.1 |                |
| TC0900008854.hg.1 | SWI5           |
| TC0900012208.hg.1 |                |
| TC0600008473.hg.1 | SMAP1          |
| TC0900009981.hg.1 |                |
| TC0800012405.hg.1 | FUT10          |
| TC1500007210.hg.1 |                |
| TC2000008949.hg.1 | doyvoy         |
| TC0X00007559.hg.1 | GJB1           |
| TC1600006743.hg.1 | ploysmer       |
| TC1200007108.hg.1 | KRAS           |
| TC0900007019.hg.1 | tylee          |
| TC0700008264.hg.1 | DBF4           |
| TC1700008127.hg.1 |                |
| TC1900010097.hg.1 |                |

|                   |                   |
|-------------------|-------------------|
| TC1500008688.hg.1 |                   |
| TC1000010198.hg.1 | RP11-305E6.4      |
| TC0X00010443.hg.1 | LOC286437         |
| TC0900009866.hg.1 |                   |
| TC1500007241.hg.1 | RP11-56B16.6      |
| TC0X00008767.hg.1 | MAGEA1            |
| TC1100007785.hg.1 | TMEM109           |
| TC0200007788.hg.1 | flarpeybo         |
| TC0700008632.hg.1 |                   |
| TC0500009778.hg.1 | RPL23AP45         |
| TC0400007245.hg.1 | TBC1D1            |
| TC1700009329.hg.1 | RP11-676J12.4     |
| TC1700006805.hg.1 | RP11-849F2.9      |
| TC1100006749.hg.1 | ZNF215            |
| TC0900011148.hg.1 | CTNNAL1           |
| TC1700010493.hg.1 | ACACA             |
| TC0100009675.hg.1 | CH17-333M13.2     |
| TC0200008418.hg.1 | AC018696.4        |
| TC1000012603.hg.1 | FAM53B            |
| TC0Y00006715.hg.1 | darby             |
| TC2000008842.hg.1 | RSL24D1P6         |
| TC0100012376.hg.1 | ZNF672            |
| TC0700012131.hg.1 | ORC5              |
| TC0100007570.hg.1 | YTHDF2            |
| TC1700009676.hg.1 | TMEM107; SNORD118 |
| TC0700008857.hg.1 | MDFIC             |
| TC0100016547.hg.1 | klorsabo          |
| TC0800011662.hg.1 |                   |
| TC1400008173.hg.1 | CCNK              |
| TC2000008193.hg.1 | IDH3B             |
| TC1100012029.hg.1 | FAM76B            |
| TC0200013852.hg.1 | LOC645129         |
| TC0800007235.hg.1 | RP11-11N9.4       |
| TC0200015602.hg.1 |                   |
| TC0500013414.hg.1 | THOC3             |
| TC1900008409.hg.1 | SAE1              |
| TC1200009567.hg.1 | fyblar            |
| TC1900007543.hg.1 | ZNF257            |
| TC0800010077.hg.1 | RP11-722E23.2     |
| TC1900011462.hg.1 | AC020922.1        |
| TC0500009460.hg.1 | MIR5003           |
| TC0300012208.hg.1 | HACD2             |
| TC1100011595.hg.1 | CCDC58P5          |

|                   |                             |
|-------------------|-----------------------------|
| TC1900011033.hg.1 | NAPA                        |
| TC0400011130.hg.1 | PAQR3                       |
| TC2200009206.hg.1 | BMS1P20; IGLV1-51; IGLV5-52 |
| TC0200016020.hg.1 | SNORD20                     |
| TC1100009794.hg.1 | RPL26P30                    |
| TC0100015763.hg.1 |                             |
| TC0800007245.hg.1 | MAK16                       |
| TC1600009870.hg.1 | SULT1A1                     |
| TC0400011252.hg.1 |                             |
| TC1200012265.hg.1 | CDK2AP1                     |
| TC0300006894.hg.1 | CMC1                        |
| TC1600010588.hg.1 | foydo                       |
| TC0100014846.hg.1 | GTF2B                       |
| TC1600006450.hg.1 | Z69890.1                    |
| TC1700009962.hg.1 | Y_RNA                       |
| TC1900010746.hg.1 | EXOSC5                      |
| TC1900007286.hg.1 | CTC-429P9.2                 |
| TC0900010677.hg.1 | zygy                        |
| TC1000009011.hg.1 |                             |
| TC1900009680.hg.1 | RN7SL833P                   |
| TC1000009215.hg.1 |                             |
| TC0X00008278.hg.1 |                             |
| TC0600014110.hg.1 | PSMB9                       |
| TC0200012976.hg.1 |                             |
| TC0700008831.hg.1 | ferbloby                    |
| TC0300012543.hg.1 | mumira                      |
| TC2100008481.hg.1 |                             |
| TC0700013361.hg.1 | ZNF713                      |
| TC1200012576.hg.1 | NDUFA9                      |
| TC2200009204.hg.1 | PPIL2                       |
| TC1900010372.hg.1 | CEP89                       |
| TC0700006635.hg.1 | SNORA42                     |
| TC1000010002.hg.1 | HNRNPRP1                    |
| TC0100017451.hg.1 | TP53BP2                     |
| TC1500009459.hg.1 | gozo                        |
| TC0100012201.hg.1 | vykloy                      |
| TC1100010223.hg.1 | AC116533.3                  |
| TC0100015890.hg.1 | DENND4B                     |
| TC1700011047.hg.1 | EIF4EP2                     |
| TC1200007653.hg.1 | NR4A1                       |
| TC1000012016.hg.1 | TIAL1                       |
| TC2200008394.hg.1 | zykee                       |
| TC2100007037.hg.1 | CBR3                        |

|                   |                        |
|-------------------|------------------------|
| TC1300008351.hg.1 | SPATA13-AS1            |
| TC0800009588.hg.1 | AF131215.2; AF131215.9 |
| TC0800007186.hg.1 | sashor                 |
| TC1900007173.hg.1 | ADGRE5                 |
| TC1400008160.hg.1 | bacharbu               |
| TC1800006933.hg.1 | taplee                 |
| TC1100008325.hg.1 | OR7E126P               |
| TC0600012061.hg.1 | ICK                    |
| TC0X00010345.hg.1 |                        |
| TC1900007749.hg.1 | forjee                 |
| TC0600008262.hg.1 | TMEM14A                |
| TC1900011616.hg.1 | AC020915.1             |
| TC0700008329.hg.1 | MGC16142               |
| TC1200007144.hg.1 | RP11-582E3.6           |
| TC1100010185.hg.1 | CYP2R1                 |
| TC0500009881.hg.1 | MRPL36                 |
| TC1600008210.hg.1 | kydo                   |
| TC1900010156.hg.1 |                        |
| TC1200011440.hg.1 |                        |
| TC1300008824.hg.1 | SLC25A30               |
| TC0900007787.hg.1 |                        |
| TC0400007492.hg.1 |                        |
| TC1000006904.hg.1 | STAM                   |
| TC1200006479.hg.1 |                        |
| TC1700007906.hg.1 | HMGB3P27               |
| TC1900011303.hg.1 |                        |
| TC1900007494.hg.1 | ZNF66                  |
| TC1300008263.hg.1 |                        |
| TC0900009894.hg.1 | KIAA1161               |
| TC0400007881.hg.1 | klustybu               |
| TC1000007308.hg.1 | sposlor                |
| TC0300012359.hg.1 |                        |
| TC0100017594.hg.1 | IBA57-AS1              |
| TC0100015055.hg.1 |                        |
| TC0600010336.hg.1 | stosnerbu              |
| TC1100012474.hg.1 | MPZL2                  |
| TC0200015928.hg.1 |                        |
| TC0900010467.hg.1 |                        |
| TC1900011541.hg.1 | AC006115.1             |
| TC0400007120.hg.1 | RBPJ                   |
| TC1500010747.hg.1 | RNF111                 |
| TC0300011160.hg.1 |                        |
| TC1700008267.hg.1 |                        |

|                   |                  |
|-------------------|------------------|
| TC0X00007737.hg.1 |                  |
| TC0300010838.hg.1 | baspoyby         |
| TC0400010648.hg.1 |                  |
| TC0100018564.hg.1 | PYCR2; MIR6741   |
| TC1900008720.hg.1 |                  |
| TC2100007343.hg.1 | bawswer          |
| TC0100010431.hg.1 | AL391001.2       |
| TC1200010512.hg.1 |                  |
| TC1700012106.hg.1 | keesko           |
| TC1100012737.hg.1 | sneemey          |
| TC1100011602.hg.1 | UCP2             |
| TC0X00011287.hg.1 |                  |
| TC0Y00007145.hg.1 | CD24P4           |
| TC0100010686.hg.1 | CACYBP           |
| TC1100006928.hg.1 | chorkorby        |
| TC0700009531.hg.1 | smukleeby        |
| TC0800008146.hg.1 | WWP1             |
| TC0700010901.hg.1 | RASA4PandPOLR2J4 |
| TC1200007014.hg.1 | flafy            |
| TC1600011566.hg.1 | TMEM170A         |
| TC0600011444.hg.1 | bloysawby        |
| TC1600010847.hg.1 | AC009120.3       |
| TC0100013497.hg.1 | SRSF4            |
| TC0900008028.hg.1 | MFSD14B          |
| TC0200009829.hg.1 | GCA              |
| TC1200011812.hg.1 | CRY1             |
| TC0400010964.hg.1 |                  |
| TC0300008563.hg.1 | DIRC2            |
| TC1400008592.hg.1 | RP11-203M5.8     |
| TC1800006786.hg.1 | RNMT             |
| TC1900008957.hg.1 | ZNF542P          |
| TC1100007512.hg.1 | flawfloybu       |
| TC0500012260.hg.1 | AC005609.17      |
| TC0800010753.hg.1 | smuwarby         |
| TC1900008349.hg.1 | AC092301.3       |
| TC2200008785.hg.1 | skerfoy          |
| TC1100011092.hg.1 | GANAB            |
| TC2200007459.hg.1 | klerchaw         |
| TC1600006909.hg.1 |                  |
| TC0900006486.hg.1 | meelo            |
| TC0600008066.hg.1 | KLHDC3           |
| TC1000006797.hg.1 |                  |
| TC0100015921.hg.1 | ADAR             |



|                   |                                                     |
|-------------------|-----------------------------------------------------|
| TC1200012836.hg.1 | C12orf73                                            |
| TC0100015732.hg.1 | rarreebo                                            |
| TC0100017457.hg.1 |                                                     |
| TC0700008639.hg.1 | SPDYE2; SPDYE2B                                     |
| TC0700008647.hg.1 | SPDYE2B                                             |
| TC0200015600.hg.1 | fleeshor                                            |
| TC0300014085.hg.1 | TBCCD1                                              |
| TC0500011259.hg.1 | wygey                                               |
| TC0900008207.hg.1 | SEC61B                                              |
| TC1900008741.hg.1 | CTD-2245F17.6; teeseebu                             |
| TC0200012989.hg.1 | wuklar                                              |
| TC0400008544.hg.1 |                                                     |
| TC0100013684.hg.1 | slerkley                                            |
| TC0500007770.hg.1 | FOXD1-AS1; RP11-79P5.2                              |
| TC1700007498.hg.1 | SUZ12                                               |
| TC0900009763.hg.1 | AL442639.1                                          |
| TC1700012150.hg.1 | AC068014.1                                          |
| TC1900009261.hg.1 | AC006130.1                                          |
| TC1700011746.hg.1 | SLC25A19                                            |
| TC0400009505.hg.1 | shoborbo                                            |
| TC0600007750.hg.1 | RP11-513I15.6                                       |
| TC0400006995.hg.1 |                                                     |
| TC0200007407.hg.1 | poyfa                                               |
| TC0800010682.hg.1 | chykor                                              |
| TC1200007013.hg.1 | flafy                                               |
| TC1600011364.hg.1 | NPIP5                                               |
|                   | GS1-124K5.11; TCONS_I2_00027397; TCONS_I2_00026657; |
| TC0700013572.hg.1 | TCONS_I2_00027396; TCONS_I2_00027398                |
| TC0300013769.hg.1 |                                                     |
| TC1000007786.hg.1 |                                                     |
| TC1700011365.hg.1 | beewabu                                             |
| TC1900010539.hg.1 | ritire                                              |
| TC0100011204.hg.1 | MIR6740                                             |
| TC0X00007130.hg.1 | sperfor                                             |
| TC1300009856.hg.1 | TUBGCP3                                             |
| TC0500008094.hg.1 | kaswabu                                             |
| TC0100017262.hg.1 | FLVCR1-AS1                                          |
| TC1600007590.hg.1 | HERC2P5                                             |
| TC2000009870.hg.1 | soypa; swoyvey                                      |
| TC1200006649.hg.1 | TPI1                                                |
| TC0900008389.hg.1 | sypleebu                                            |
| TC0100014638.hg.1 | PIGK                                                |
| TC1500007975.hg.1 | IREB2                                               |

|                   |              |
|-------------------|--------------|
| TC1400007246.hg.1 | kazer        |
| TC1200011964.hg.1 | RP1-267L14.6 |
| TC1900008715.hg.1 |              |
| TC0600008471.hg.1 | SDHAF4       |
| TC0200015996.hg.1 | BANF1P3      |
| TC0900006544.hg.1 | MTATP6P11    |
| TC1700009078.hg.1 | peyseebo     |
| TC0100016551.hg.1 | mukoybu      |
| TC1300008362.hg.1 | AL359538.2   |
| TC1900011521.hg.1 | AC006116.1   |
| TC1800008125.hg.1 | RP11-973H7.3 |
| TC0700010687.hg.1 | KBTBD2       |
| TC1200007536.hg.1 | CCDC65       |
| TC0500007699.hg.1 | SMN1         |
| TC1200006506.hg.1 |              |
| TC0200015332.hg.1 | PGAP1        |
| TC1900011392.hg.1 | TFPT         |
| TC0100015744.hg.1 | U4           |
| TC1600007214.hg.1 | RP11-20G6.1  |
| TC1600011502.hg.1 | LOC100190986 |
| TC0100012698.hg.1 | RP11-312B8.1 |
| TC0200008870.hg.1 | BCL2L11      |
| TC2200008434.hg.1 | SF3A1        |
| TC0500012662.hg.1 | ZBED8        |
| TC0700009527.hg.1 |              |
| TC0100018285.hg.1 | NBPF19       |
| TC0300011062.hg.1 | kuforbo      |
| TC1900011814.hg.1 | ZNF17        |
| TC0300011305.hg.1 |              |
| TC0600013429.hg.1 | smavuby      |
| TC0200016021.hg.1 | SNORD82      |
| TC0300013686.hg.1 | gleynarbo    |
| TC0100014568.hg.1 | AL158839.1   |
| TC2000009730.hg.1 |              |
| TC0700011764.hg.1 | zarjy        |
| TC1200007052.hg.1 | GOLT1B       |
| TC0X00009615.hg.1 | fafaw        |
| TC1400007635.hg.1 |              |
| TC0100008938.hg.1 | LMO4         |
| TC0500013226.hg.1 | CDC42SE2     |
| TC1200006663.hg.1 | sterbleyby   |
| TC0200010732.hg.1 | starswyby    |
| TC1000011495.hg.1 | snawshu      |

|                   |                        |
|-------------------|------------------------|
| TC1400008781.hg.1 | RP11-483C6.1           |
| TC0400011712.hg.1 | PDE5A                  |
| TC1300008459.hg.1 | goyzoy                 |
| TC0500012147.hg.1 | HNRNPA0                |
| TC1400009651.hg.1 | gyberby                |
| TC0200012312.hg.1 | HSPE1P13               |
| TC2200007839.hg.1 |                        |
| TC1400007644.hg.1 | ACOT1                  |
| TC1300006974.hg.1 | NAA16                  |
| TC1000008773.hg.1 | RP11-225H22.7          |
| TC1000012410.hg.1 | AL161645.1             |
| TC1100008187.hg.1 | PPP6R3                 |
| TC1100010989.hg.1 |                        |
| TC0400007484.hg.1 |                        |
| TC0200012418.hg.1 | LRPPRC                 |
| TC0300012896.hg.1 |                        |
| TC1700007475.hg.1 | RP11-848P1.2           |
| TC0300013215.hg.1 | TBL1XR1                |
| TC0500011026.hg.1 | smostawbu              |
| TC0500011048.hg.1 | tyfler                 |
| TC0800010283.hg.1 |                        |
| TC0900009407.hg.1 | nayumu                 |
| TC1000006437.hg.1 | sneyskey               |
| TC0300010680.hg.1 | CLASP2                 |
| TC0900009928.hg.1 | geeteebo               |
| TC1600009507.hg.1 | darpy                  |
| TC0100009902.hg.1 | PRPF3                  |
| TC0100017106.hg.1 | Y_RNA                  |
| TC0800011446.hg.1 | AP000428.1             |
| TC0Y00006860.hg.1 | skarbu                 |
| TC0100015003.hg.1 | RP11-57H12.5           |
| TC1600007160.hg.1 | shysmer                |
| TC0700012062.hg.1 | bloyblee               |
| TC1700010491.hg.1 | glasmee                |
| TC0900009861.hg.1 | NOL6                   |
| TC0X00011201.hg.1 |                        |
| TC0200010516.hg.1 | CYP20A1                |
| TC0100014032.hg.1 | IPP                    |
| TC1700011096.hg.1 | MRPL27                 |
| TC0400009774.hg.1 | RP11-503N18.5          |
| TC1400006529.hg.1 | ANG; RNASE4            |
| TC1200011196.hg.1 |                        |
| TC0100015521.hg.1 | LOC645166; RP11-14N7.2 |

|                   |                                     |
|-------------------|-------------------------------------|
| TC2100006538.hg.1 |                                     |
| TC0400007460.hg.1 | OCIAD1                              |
| TC1700009947.hg.1 |                                     |
| TC1200008877.hg.1 | SH2B3                               |
| TC1400009712.hg.1 | gawsmer                             |
| TC0300008908.hg.1 | fordybu                             |
| TC1300008944.hg.1 | shafarby                            |
| TC0900010256.hg.1 | BMS1P11                             |
| TC0700008561.hg.1 | POP7                                |
| TC2000007476.hg.1 | STK4                                |
| TC1900008655.hg.1 | ZNF175                              |
| TC1600008763.hg.1 | LOC101928659; RP11-178L8.7; farwobo |
| TC1900011564.hg.1 |                                     |
| TC1700006606.hg.1 | swuglee                             |
| TC0300009571.hg.1 |                                     |
| TC0900010586.hg.1 | C9orf64                             |
| TC0700007292.hg.1 |                                     |
| TC1900009016.hg.1 |                                     |
| TC1400006561.hg.1 | plawpy                              |
| TC1900007483.hg.1 | kloykee                             |
| TC0200007357.hg.1 | tiraro                              |
| TC0100007238.hg.1 | deykoybu                            |
| TC0300007557.hg.1 | CCDC66                              |
| TC0600010056.hg.1 | WTAP                                |
| TC0700006646.hg.1 |                                     |
| TC0300011590.hg.1 | OR7E121P                            |
| TC1400008905.hg.1 | SPTSSA                              |
| TC1900010249.hg.1 |                                     |
| TC0900009842.hg.1 |                                     |
| TC0300012663.hg.1 | fludobu                             |
| TC1400007572.hg.1 | klopo                               |
| TC0400012854.hg.1 | TMEM144                             |
| TC0700006907.hg.1 | vusmabu                             |
| TC1200012048.hg.1 | MIR620                              |
| TC1200007010.hg.1 | PLEKHA5                             |
| TC0900009042.hg.1 |                                     |
| TC0X00006476.hg.1 | CD99P1                              |
| TC0X00007299.hg.1 | RP11-564H18.1                       |
| TC0500011776.hg.1 | soture                              |
| TC1800009056.hg.1 | ZADH2                               |
| TC0X00010077.hg.1 | spawdy                              |
| TC0700008568.hg.1 | SRRT                                |
| TC1900007073.hg.1 |                                     |

|                         |              |
|-------------------------|--------------|
| TC0800007310.hg.1       | skorvuby     |
| TC1700008067.hg.1       | RP11-798G7.8 |
| TC1200006716.hg.1       | AC092865.1   |
| TC2200007892.hg.1       | CECR5        |
| TC1700007742.hg.1       |              |
| TC1200010950.hg.1       | STAT6        |
| TC0100008642.hg.1       |              |
| TC1700006531.hg.1       | spuree       |
| TC0200015976.hg.1       | SP110        |
| TC0100014038.hg.1       | supla        |
| TC0200012868.hg.1       | bleejorbo    |
| TC1900007906.hg.1       | TBCB         |
| TC1900009864.hg.1       | sarsoy       |
| TC0200008063.hg.1       | DGUOK        |
| TC0100015235.hg.1       |              |
| TC1000008779.hg.1       | RP11-416N2.4 |
| TC0400008683.hg.1       | speyklarby   |
| TC0100017396.hg.1       |              |
| TC1300007374.hg.1       | kloyshorbu   |
| TC0900009309.hg.1       | snarby       |
| TC0100016580.hg.1       | U6           |
| TC0300012880.hg.1       | C3orf33      |
| TC1900008407.hg.1       | karny        |
| TC0300011848.hg.1       |              |
| TC1700007131.hg.1       | yanema       |
| TC2000009866.hg.1       |              |
| TC0200013869.hg.1       | LINC01106    |
| TC0700007352.hg.1       | BLVRA        |
| TC0400010302.hg.1       |              |
| TC0400012963.hg.1       |              |
| TC1900009697.hg.1       |              |
| TC0100013714.hg.1       | perzobo      |
| TC1700010001.hg.1       | SNORD3D      |
| TC0100015803.hg.1       | TDRKH        |
| TC0100009859.hg.1       | U1           |
| TC1000010177.hg.1       |              |
| TC0700007126.hg.1       | LINC00997    |
| TC0500012798.hg.1       |              |
| TSUnmapped00000080.hg.1 | ATG16L1      |
| TC1100011357.hg.1       |              |
| TC1200008441.hg.1       | kleyglyby    |
| TC0300006726.hg.1       | MIR563       |
| TC0600013873.hg.1       | GNG5P1       |

|                         |                                  |
|-------------------------|----------------------------------|
| TSUnmapped00000390.hg.1 | RPS6KA1                          |
| TC0100009719.hg.1       | LOC645166                        |
| TC0300007456.hg.1       |                                  |
| TC1100009424.hg.1       |                                  |
| TC0800007220.hg.1       | AC104000.1                       |
| TC1200006766.hg.1       |                                  |
| TC0700010170.hg.1       | RNF216                           |
| TC0500008611.hg.1       |                                  |
| TC0100017587.hg.1       | MRPL55                           |
| TC1100010990.hg.1       | MRPL16                           |
| TC0800011061.hg.1       | NBN                              |
| TC1900008531.hg.1       | AC011450.1                       |
| TC1100006845.hg.1       | terflerbu                        |
| TC1200011021.hg.1       |                                  |
| TC1000007623.hg.1       |                                  |
| TC2000007991.hg.1       | LSM14B                           |
| TC1700011739.hg.1       | plervubu                         |
| TC0100013271.hg.1       | rawabo                           |
| TC0300009525.hg.1       | flawkerbu                        |
| TC0200010419.hg.1       | SGOL2                            |
| TSUnmapped00000348.hg.1 | RP1-257I20.14                    |
| TC0100013267.hg.1       | LUZP1                            |
| TC2100007729.hg.1       | LOC101927843; AP000472.2; skutar |
| TC0100010525.hg.1       | SFT2D2                           |
| TC0400011086.hg.1       | bawglawby                        |
| TC1500006435.hg.1       |                                  |
| TC0200013910.hg.1       |                                  |
| TC0800007014.hg.1       | skukoy                           |
| TC1000008800.hg.1       | GSTO1                            |
| TC2200008179.hg.1       | C22orf43                         |
| TC0200015734.hg.1       | zumawbo                          |
| TC0100009448.hg.1       | gawkoybu                         |
| TSUnmapped00000068.hg.1 | ZNF780A                          |
| TC2100008171.hg.1       | LCA5L                            |
| TC0100009678.hg.1       |                                  |
| TC0600010791.hg.1       | Y_RNA                            |
| TC0700008316.hg.1       | noypleeby                        |
| TC1800006527.hg.1       |                                  |
| TC1400006521.hg.1       | PNP                              |
| TC1300008454.hg.1       | PAN3-AS1                         |
| TC1900010043.hg.1       | TMEM161A                         |
| TC1000007364.hg.1       |                                  |
| TC0700007414.hg.1       |                                  |

|                         |               |
|-------------------------|---------------|
| TC0900009676.hg.1       | vyreyby       |
| TC0600014128.hg.1       |               |
| TC1200011846.hg.1       | CORO1C        |
| TC0300013944.hg.1       | FGD5-AS1      |
| TC0500009250.hg.1       | UBLCP1        |
| TC1500007979.hg.1       | PSMA4         |
| TC0900006584.hg.1       |               |
| TC0200015476.hg.1       | RAPH1         |
| TC0100011730.hg.1       | RP11-504P24.9 |
| TC0100018519.hg.1       | F11R          |
| TC0200014261.hg.1       |               |
| TC0400008854.hg.1       | ZNF330        |
| TC0300009653.hg.1       |               |
| TC0900006959.hg.1       |               |
| TC0100009899.hg.1       | C1orf54       |
| TC0700012707.hg.1       |               |
| TC1000007487.hg.1       |               |
| TSUnmapped00000341.hg.1 | ZNF780A       |
| TC1600006480.hg.1       |               |
| TC0100013210.hg.1       | voyrarbo      |
| TC0200016530.hg.1       | PLEKHB2       |
| TC1500009879.hg.1       |               |
| TC0X00010799.hg.1       | ELF4          |
| TC0300009600.hg.1       | ZNF639        |
| TC0300013295.hg.1       |               |
| TC2200009278.hg.1       | RBX1          |
| TC0500009767.hg.1       | RNU6-705P     |
| TC0100015522.hg.1       | gypeybo       |
| TC0600006808.hg.1       | FARS2         |
| TC1000008802.hg.1       | skolawby      |
| TC0100014781.hg.1       |               |
| TC0700007632.hg.1       | SNORA15       |
| TC2200008819.hg.1       | RANGAP1       |
| TC1000006924.hg.1       | ARL5B         |
| TC0300007581.hg.1       | ARF4-AS1      |
| TC1900009611.hg.1       |               |
| TC1700009696.hg.1       | swawboy       |
| TC1100013019.hg.1       |               |
| TC0300009451.hg.1       | MYNN          |
| TC1700007946.hg.1       |               |
| TC0700012097.hg.1       | bawneyby      |
| TC2000008990.hg.1       | COX7BP2       |
| TC1400009741.hg.1       |               |

|                   |                    |
|-------------------|--------------------|
| TC0500008964.hg.1 | blosnarbu          |
| TC1200007609.hg.1 |                    |
| TC1200007899.hg.1 | 9-Mar              |
| TC0300012378.hg.1 | charvawbo          |
| TC0400012001.hg.1 | plarfley           |
| TC0900009335.hg.1 | fleewarby; rawswey |
| TC1600007161.hg.1 | joybloy            |
| TC1600007179.hg.1 | napo               |
| TC2000009933.hg.1 | ZFAS1              |
| TC1700009327.hg.1 | GEMIN4             |
| TC0400007515.hg.1 |                    |
| TC0400011294.hg.1 | PIGY; PYURF        |
| TC0100012097.hg.1 | LGALS8             |
| TC0100014673.hg.1 | RP11-472F19.1      |
| TC1200007689.hg.1 | rawflaw            |
| TC0400008788.hg.1 | RN7SL382P          |
| TC0300012449.hg.1 | CPNE4              |
| TC0800009589.hg.1 | AF131215.3; XKR6   |
| TC1000007520.hg.1 | RP11-38L15.8       |
| TC1600010794.hg.1 | AP1G1              |
| TC1600006822.hg.1 | METTL22            |
| TC0900008801.hg.1 | RP11-356B19.11     |
| TC0300013977.hg.1 | C3orf62            |
| TC0300008717.hg.1 | vawborbu           |
| TC0700011481.hg.1 | SPDYE8P            |
| TC0300012459.hg.1 |                    |
| TC1100008985.hg.1 | ATM                |
| TC0100016128.hg.1 | skurerbu           |
| TC0700008090.hg.1 | HSPB1              |
| TC0700012910.hg.1 | reeblaw            |
| TC0600014283.hg.1 | NUDT3              |
| TC0X00008832.hg.1 | GDI1               |
| TC1900007433.hg.1 | tygley             |
| TC0700010537.hg.1 |                    |
| TC1200010337.hg.1 | RP11-278C7.3       |
| TC0400011131.hg.1 | magar              |
| TC0500013229.hg.1 | C5orf24            |
| TC0700011519.hg.1 | STAG3L2            |
| TC0X00009867.hg.1 | SPIN4              |
| TC0900010395.hg.1 | HSPB1P1            |
| TC1000007556.hg.1 | RHEBP2             |
| TC1000009092.hg.1 | INPP5F             |
| TC0100015049.hg.1 | FRRS1              |



|                   |                         |
|-------------------|-------------------------|
| TC1500007182.hg.1 | RP11-295H24.4           |
| TC0300011733.hg.1 | CBX5P1                  |
| TC0100011548.hg.1 |                         |
| TC1400009742.hg.1 |                         |
| TC1900010232.hg.1 | buteebu                 |
| TC1200007240.hg.1 | RP11-467L13.5           |
| TC1900006996.hg.1 | smafley                 |
| TC1100010183.hg.1 | cherkorby               |
| TC0X00007662.hg.1 |                         |
| TC0800007538.hg.1 | sarwyby                 |
| TC0700009851.hg.1 | RNF32                   |
| TC1900006897.hg.1 | vabey                   |
| TC1900008036.hg.1 | MRPS12                  |
| TC0400006571.hg.1 | weefley                 |
| TC1900007230.hg.1 |                         |
| TC0600008093.hg.1 |                         |
| TC1900011925.hg.1 | ZNF91                   |
| TC0X00006515.hg.1 |                         |
| TC1900007970.hg.1 | vuchee                  |
| TC0200007722.hg.1 | USP34                   |
| TC1900011999.hg.1 | CTC-30107.4             |
| TC0200013225.hg.1 | AC138623.1              |
| TC1600006653.hg.1 | THOC6                   |
| TC0X00008055.hg.1 | TBC1D8B                 |
| TC1900007933.hg.1 |                         |
| TC0400011089.hg.1 | spygla                  |
| TC1500009389.hg.1 | CTD-3110H11.1; snerdoby |
| TC0500009478.hg.1 | RPL26L1                 |
| TC0700009394.hg.1 | AGK                     |
| TC1100008978.hg.1 | RAB39A                  |
| TC0300012133.hg.1 | seybawbu                |
| TC0400008910.hg.1 | klawswabu               |
| TC1400010051.hg.1 | kleesna                 |
| TC0700010198.hg.1 | FAM220A                 |
| TC0300010681.hg.1 | stofubo                 |
| TC0200011114.hg.1 | sajabo                  |
| TC1400009974.hg.1 | gleyboyby               |
| TC1000012584.hg.1 | ERLIN1                  |
| TC0900010623.hg.1 | ISCA1                   |
| TC1500010026.hg.1 |                         |
| TC0600009394.hg.1 | bawplerbu               |
| TC0600012731.hg.1 | ATG5                    |
| TC0100014663.hg.1 | RP11-386I14.4           |

|                   |                |
|-------------------|----------------|
| TC1400009989.hg.1 | RP11-747H7.3   |
| TC0X00009256.hg.1 | KLHL15         |
| TC1300008225.hg.1 | PSPC1          |
| TC1900008991.hg.1 | CTC-444N24.11  |
| TC0700010716.hg.1 | DPY19L1        |
| TC0X00009356.hg.1 | TMEM47         |
| TC1900008746.hg.1 | ZNF845         |
| TC0200014972.hg.1 | doykler        |
| TC1900010360.hg.1 | ANKRD27        |
| TC1900010312.hg.1 |                |
| TC1000008025.hg.1 | Y_RNA          |
| TC0300010040.hg.1 | NCBP2-AS2      |
| TC0200015446.hg.1 | LOC645805      |
| TC0300013081.hg.1 | pasmoyby       |
| TC0600014044.hg.1 | PSMB1          |
| TC1500009078.hg.1 |                |
| TC0700012293.hg.1 | TMEM168        |
| TC1600009895.hg.1 | RP11-264B17.2  |
| TC1000010321.hg.1 | glotarbo       |
| TC0700008884.hg.1 | dorskoyby      |
| TC0100017668.hg.1 | TAF5L          |
| TC0700012107.hg.1 | feysmeebu      |
| TC1200012797.hg.1 |                |
| TC0500007777.hg.1 |                |
| TC1200010701.hg.1 | storplyby      |
| TC2000007620.hg.1 | ARFGEF2        |
| TC1400007337.hg.1 | JKAMP          |
| TC2000009589.hg.1 |                |
| TC0100016903.hg.1 | TMEM9          |
| TC2100006941.hg.1 |                |
| TC0X00009718.hg.1 | XAGE1E; XAGE1B |
| TC1300009492.hg.1 | TGDS           |
| TC1700012339.hg.1 | NUP88          |
| TC0400007252.hg.1 | sterstabu      |
| TC0500007754.hg.1 | TNPO1          |
| TC1700011519.hg.1 | HELZ           |
| TC1700009369.hg.1 | dawwaw         |
| TC1300007591.hg.1 | RBM26-AS1      |
| TC1100012840.hg.1 |                |
| TC1600006560.hg.1 | LA16c-431H6.7  |
| TC0300007232.hg.1 | slufeebo       |
| TC1600007016.hg.1 |                |
| TC1200010654.hg.1 | royjorby       |

|                   |                  |
|-------------------|------------------|
| TC1000009175.hg.1 |                  |
| TC0400008368.hg.1 |                  |
| TC0300009468.hg.1 | PRKCI            |
| TC0100013352.hg.1 | SDHDP6           |
| TC1400007283.hg.1 | feedor           |
| TC0100015475.hg.1 | PHGDH            |
| TC1700006766.hg.1 |                  |
| TC1400008923.hg.1 | RNU7-41P         |
| TC1600008324.hg.1 | teyzabu          |
| TC0200014870.hg.1 | METTL5           |
| TC1400007280.hg.1 |                  |
| TC1900008714.hg.1 |                  |
| TC0300011200.hg.1 | TKT              |
| TC1200006453.hg.1 | tawgeeby         |
| TC0100010046.hg.1 | SNAPIN           |
| TC1200007898.hg.1 |                  |
| TC0200009270.hg.1 | RAB6C            |
| TC0500010476.hg.1 | RAD1             |
| TC0700011166.hg.1 | CHCHD2           |
| TC1200007866.hg.1 | SHMT2            |
| TC0700013459.hg.1 | RP11-155G14.5    |
| TC0200007059.hg.1 | CAD              |
| TC0100008375.hg.1 | TCEANC2; MIR4781 |
| TC1200009256.hg.1 | borgawby         |
| TC0Y00007180.hg.1 | RBMV2EP          |
| TC0400007458.hg.1 | sarsmarby        |
| TC0500012259.hg.1 | AC005609.18      |
| TC2200008274.hg.1 |                  |
| TC1200012502.hg.1 | RP13-820C6.2     |
| TC2000008775.hg.1 | FRG1CP           |
| TC0700007554.hg.1 | HAUS6P1          |
| TC1700011045.hg.1 | PHB              |
| TC0X00010107.hg.1 | ZDHHC15          |
| TC0300013296.hg.1 | DNAJC19          |
| TC0700011774.hg.1 | mawmer           |
| TC0800010191.hg.1 | CTD-2544N14.3    |
| TC0800011263.hg.1 | AP001205.1       |
| TC1200008322.hg.1 | TMTC2            |
| TC1200010129.hg.1 | RP11-153K16.2    |
| TC1200011086.hg.1 | slerfyby         |
| TC0100013270.hg.1 |                  |
| TC0X00010409.hg.1 | BEX2             |
| TC0900011254.hg.1 | CDC26            |

|                   |                |
|-------------------|----------------|
| TC0400006454.hg.1 | ZNF519P4       |
| TC0700008830.hg.1 |                |
| TC0200016676.hg.1 | WDPCP          |
| TC0400009701.hg.1 | RP11-440L14.4  |
| TC0800010945.hg.1 | SLC10A5        |
| TC0100011574.hg.1 | yurero         |
| TC0600008861.hg.1 |                |
| TC0600013576.hg.1 |                |
| TC0400011614.hg.1 | rersnawby      |
| TC1100013027.hg.1 | COX8A          |
| TC0600013124.hg.1 | RP11-325O24.2  |
| TC1200006966.hg.1 | STRAP          |
| TC1100010349.hg.1 | SVIP           |
| TC0900006970.hg.1 | NFX1           |
| TC0300013660.hg.1 |                |
| TC1200012547.hg.1 | RP11-46H11.11  |
| TC0600008023.hg.1 | RP11-298J23.9  |
| TC1200010601.hg.1 | FKBP11; ARF3   |
| TC1900010850.hg.1 | blashy         |
| TC1000007494.hg.1 | flarsmar       |
| TC0300011735.hg.1 |                |
| TC1400009110.hg.1 | hima           |
| TC1300009332.hg.1 | RBM26          |
| TC1700011745.hg.1 | honiri         |
| TC0500008963.hg.1 | RPL7P21        |
| TC0100015791.hg.1 | POGZ           |
| TC0800007985.hg.1 | GDAP1          |
| TC0100014531.hg.1 | WLS            |
| TC1800008223.hg.1 | storwu         |
| TC2000008283.hg.1 |                |
| TC1000012581.hg.1 | ARHGAP19-SLIT1 |
| TC1300007589.hg.1 |                |
| TC1000007275.hg.1 | CCNY           |
| TC0100009507.hg.1 | RNY1P13        |
| TC1200006581.hg.1 | zarfu          |
| TC1600011350.hg.1 | PMM2           |
| TC0300010012.hg.1 | shykawbo       |
| TC0400008067.hg.1 |                |
| TC0100007538.hg.1 | PPP1R8         |
| TC0300009613.hg.1 | USP13          |
| TC0900009858.hg.1 | dugo           |
| TC1400006734.hg.1 |                |
| TC2200009181.hg.1 | setara         |

|                         |                   |
|-------------------------|-------------------|
| TC0200008002.hg.1       | klerporbo         |
| TC0600014264.hg.1       | DDAH2             |
| TC1300008558.hg.1       | N4BP2L2-IT2       |
| TC1000010613.hg.1       | spawmorby         |
| TC0200012019.hg.1       | snawjarbu         |
| TC0700007867.hg.1       |                   |
| TC1100007142.hg.1       |                   |
| TC0X00007568.hg.1       | TAF1              |
| TC0100018014.hg.1       | tumerbu           |
| TSUnmapped00000239.hg.1 | ATG16L1           |
| TC1000012094.hg.1       | wermu             |
| TC0100009677.hg.1       |                   |
| TC1500007318.hg.1       | TEX9              |
| TC0100016370.hg.1       |                   |
| TC1700007189.hg.1       | ALDH3A2           |
| TC1100009428.hg.1       |                   |
| TC1600006899.hg.1       | feywarbu          |
| TC0600011421.hg.1       | AL671883.1        |
| TC0100018094.hg.1       | RNA5SP82          |
| TC0400008424.hg.1       | C4orf32           |
| TC0500011173.hg.1       | POC5              |
| TC0700009258.hg.1       | RP11-644N4.1      |
| TC1300009275.hg.1       |                   |
| TC1200009764.hg.1       | RNU7-1; U47924.31 |
| TC1300006808.hg.1       |                   |
| TC0100016485.hg.1       |                   |
| TC0100015512.hg.1       |                   |
| TC1200006828.hg.1       | sushar            |
| TC0700007971.hg.1       | glusharby         |
| TC0X00008514.hg.1       | DDX26B            |
| TC0300012289.hg.1       | simara            |
| TC0X00008482.hg.1       | snawfoy           |
| TC2000007347.hg.1       |                   |
| TC1900008244.hg.1       | starsaw           |
| TC2000008157.hg.1       |                   |
| TC0400011577.hg.1       | husume            |
| TC0300010799.hg.1       |                   |
| TC0600014126.hg.1       | GLTSCR1L          |
| TC0300013329.hg.1       | RP11-531F16.4     |
| TC0300011924.hg.1       |                   |
| TC0700013238.hg.1       |                   |
| TC1700008931.hg.1       |                   |
| TC0600007544.hg.1       | TUBB              |

|                   |                                    |
|-------------------|------------------------------------|
| TC0100011963.hg.1 | SPRTN                              |
| TC0500010717.hg.1 | MOCS2                              |
| TC0700009727.hg.1 | worko                              |
| TC2100007156.hg.1 | chawsoy                            |
| TC0100007345.hg.1 | zerby                              |
| TC0200015091.hg.1 | padoy                              |
| TC0X00008566.hg.1 |                                    |
| TC0400012811.hg.1 | DCK                                |
| TC0300013794.hg.1 | AC093495.4                         |
| TC1900006546.hg.1 | gleeku                             |
| TC0400011469.hg.1 | blatee                             |
| TC0900007994.hg.1 | PHF2                               |
| TC1100009501.hg.1 |                                    |
| TC1400010747.hg.1 |                                    |
| TC0600014238.hg.1 | BLOC1S5                            |
| TC0100015233.hg.1 |                                    |
| TC0200015889.hg.1 | wadee                              |
| TC1700012193.hg.1 | NDEL1                              |
| TC0700011003.hg.1 | HUS1                               |
| TC0400011203.hg.1 | HPSE                               |
| TC1600007085.hg.1 | wardu                              |
| TC0400008335.hg.1 | AIMP1                              |
| TC0300007841.hg.1 | rurerbu                            |
| TC0300011301.hg.1 |                                    |
| TC1400009427.hg.1 | wapo                               |
| TC0800012351.hg.1 | WDYHV1                             |
| TC0200012057.hg.1 | RP11-195B17.1                      |
| TC0X00008617.hg.1 |                                    |
| TC1200012562.hg.1 | kawjerby                           |
| TC1900007059.hg.1 | LOC101928464; CTD-2006C1.2; homure |
| TC0800007142.hg.1 | RP11-662B19.1                      |
| TC0100012087.hg.1 |                                    |
| TC0600007504.hg.1 | ZNRD1-AS1_1                        |
| TC0800009239.hg.1 | CYC1                               |
| TC1100007827.hg.1 | gleyplo                            |
| TC1400010331.hg.1 | XRCC3                              |
| TC1600011278.hg.1 | blyzubu                            |
| TC0800006656.hg.1 | kleeslarbu                         |
| TC1600007399.hg.1 | sneera                             |
| TC1800007866.hg.1 | zorteebu                           |
| TC0100009744.hg.1 | neelybu                            |
| TC1800007933.hg.1 | nywu                               |
| TC0400008348.hg.1 | HADH                               |

|                                         |                    |
|-----------------------------------------|--------------------|
| TC0900007030.hg.1                       | voyreyby           |
| TC0100008404.hg.1                       | fluplo             |
| TC1400010494.hg.1                       | IGHV3-29           |
| TC0X00006665.hg.1                       |                    |
| TC1100011929.hg.1                       |                    |
| TC0200014192.hg.1                       | SAP130             |
| TC2200008209.hg.1                       |                    |
| TC17_GL000205v2_random<br>00006438.hg.1 |                    |
| TC0900010765.hg.1                       | seeshee            |
| TC1400008985.hg.1                       |                    |
| TC2100007284.hg.1                       | smeytar            |
| TC0600008359.hg.1                       |                    |
| TC2000009378.hg.1                       | karker             |
| TC0700011125.hg.1                       | klorblorby         |
| TC1700007811.hg.1                       | TMEM99             |
| TC0600007775.hg.1                       | sterglyby          |
| TC0600014096.hg.1                       | TRIM39-RPP21       |
| TC0200011793.hg.1                       | AC016730.2         |
| TC1700008895.hg.1                       | NUP85              |
| TC1000011021.hg.1                       | slusha             |
| TC1000007217.hg.1                       | KIF5B              |
| TC1800008611.hg.1                       | RP11-49K24.4       |
| TC1000011589.hg.1                       | RP11-483F11.7      |
| TC0300009033.hg.1                       | PLS1               |
| TC1900008697.hg.1                       | stusee             |
| TC0200011065.hg.1                       |                    |
| TC1600011376.hg.1                       | MAZ                |
| TC1400009438.hg.1                       |                    |
| TC1600008442.hg.1                       | shoraw             |
| TC1600009736.hg.1                       |                    |
| TC1900011074.hg.1                       | CTC-273B12.5; futy |
| TC1600010768.hg.1                       |                    |
| TC1000010992.hg.1                       |                    |
| TC0900010365.hg.1                       | tular              |
| TC0100015587.hg.1                       |                    |
| TC1700011729.hg.1                       |                    |
| TC1900009710.hg.1                       |                    |
| TC1700008794.hg.1                       | SOX9               |
| TC1300007101.hg.1                       | FKBP1AP3           |
| TC1800009222.hg.1                       | RNF125             |
| TC2200007405.hg.1                       |                    |
| TC1600011342.hg.1                       | NAA60              |

|                         |                       |
|-------------------------|-----------------------|
| TC0300014044.hg.1       | RP11-434H6.7          |
| TC0900009164.hg.1       | MRPS2                 |
| TC1300008774.hg.1       | RP11-5G9.5            |
| TC1900008707.hg.1       |                       |
| TC0900009926.hg.1       | RP11-182N22.9; hamere |
| TC1200010808.hg.1       | RP11-793H13.11        |
| TC0100011941.hg.1       |                       |
| TC0500008482.hg.1       |                       |
| TC1900008711.hg.1       | sweysee               |
| TC0X00006977.hg.1       | MID1IP1               |
| TC0100015564.hg.1       | borlee; dawsybo       |
| TC0400010949.hg.1       |                       |
| TC1200012112.hg.1       | smeygoyby             |
| TC0800008150.hg.1       | CPNE3                 |
| TC1200010602.hg.1       | tokire                |
| TC0800011435.hg.1       | kleekey               |
| TC0100014821.hg.1       | kloyklor              |
| TC1400007052.hg.1       |                       |
| TC1400009787.hg.1       | SPTLC2                |
| TC1800008881.hg.1       |                       |
| TC0200013109.hg.1       | PCGF1                 |
| TC1900011493.hg.1       | AC010525.5            |
| TC0300011379.hg.1       | goysweyby             |
| TC0700009370.hg.1       |                       |
| TC0600014237.hg.1       | EEF1E1-BLOC1S5        |
| TC1100009377.hg.1       | OR10D3                |
| TC1100007287.hg.1       | TRIM44                |
| TC2000007659.hg.1       |                       |
| TC0900007646.hg.1       | VPS13A                |
| TC0800009320.hg.1       |                       |
| TSUnmapped00000476.hg.1 | HMBS                  |
| TC0800011129.hg.1       | CDH17                 |
| TC0400009353.hg.1       |                       |
| TC0800009302.hg.1       | AC144568.4            |
| TC0200016706.hg.1       | MRPS5                 |
| TC0400007580.hg.1       | CEP135                |
| TC1900011085.hg.1       | CA11                  |
| TC0400011468.hg.1       | doybobo               |
| TC0100015874.hg.1       |                       |
| TC1900007946.hg.1       |                       |
| TC1700010948.hg.1       |                       |
| TC1200011843.hg.1       | SART3                 |
| TC2000008322.hg.1       | wojy                  |



|                         |                        |
|-------------------------|------------------------|
| TC1200010332.hg.1       | RP11-278C7.2           |
| TC0700010536.hg.1       | CTB-119C2.1            |
| TC1200009463.hg.1       | terflobu               |
| TC2200008708.hg.1       | RP3-508I15.9; putey    |
| TC0600007765.hg.1       |                        |
| TC0200016396.hg.1       |                        |
| TC1400006727.hg.1       | ferswey; RP11-468E2.10 |
| TC0900009982.hg.1       |                        |
| TC0500009131.hg.1       | G3BP1                  |
| TC0300012407.hg.1       | swuborbu               |
| TC0400010427.hg.1       | blargloby              |
| TC0200007403.hg.1       |                        |
| TC0X00007553.hg.1       |                        |
| TC0200013061.hg.1       | PRADC1                 |
| TC0X00008235.hg.1       | LONRF3                 |
| TC1100007273.hg.1       | CD44                   |
| TC1400009498.hg.1       |                        |
| TC2000009023.hg.1       | SAMHD1                 |
| TC0200006676.hg.1       | RP11-254F7.4           |
| TC1200011895.hg.1       | sanimi                 |
| TC0400011589.hg.1       | glafloy                |
| TC0600013271.hg.1       | MTFR2                  |
| TC0900010678.hg.1       |                        |
| TC1200010194.hg.1       | norchaw                |
| TC0500012029.hg.1       |                        |
| TC1900009779.hg.1       |                        |
| TC1900009705.hg.1       |                        |
| TC1500009512.hg.1       | CNOT6LP1               |
| TC1200009489.hg.1       | FBRSL1                 |
| TC0800009590.hg.1       |                        |
| TC0400008554.hg.1       | susneeby               |
| TSUnmapped00000563.hg.1 | RP11-932O9.9           |
| TC1100007219.hg.1       | notomi                 |
| TC1100011396.hg.1       | wyglarbu               |
| TC0500009628.hg.1       | RP11-1277A3.3          |
| TC2200007465.hg.1       |                        |
| TC0500007883.hg.1       | geesterbu              |
| TC2100006787.hg.1       | GABPA                  |
| TC0700010134.hg.1       |                        |
| TC1700007149.hg.1       | SNORD3B-1; SNORD3B-2   |
| TC2000009909.hg.1       | RALY                   |
| TC0900012155.hg.1       | MSANTD3-TMEFF1         |
| TC0300012460.hg.1       |                        |

|                         |                 |
|-------------------------|-----------------|
| TC0500011551.hg.1       | DKFZp434P228    |
| TC1700007158.hg.1       | SNORD3A         |
| TC0300009168.hg.1       | SELT; SELT.1    |
| TC0900008802.hg.1       | tawler          |
| TC0300011158.hg.1       | WDR82           |
| TC0900010580.hg.1       | GKAP1           |
| TC2000008096.hg.1       |                 |
| TC0100014901.hg.1       | blobar          |
| TC0600008261.hg.1       | LOC730101       |
| TC1200008629.hg.1       | DRAM1           |
| TC1100011540.hg.1       | darmoy          |
| TC0200013232.hg.1       | SUCLG1          |
| TC0400012330.hg.1       | zoyspyby        |
| TC1400006728.hg.1       |                 |
| TC2000006818.hg.1       | PET117; CSRP2BP |
| TC0200010342.hg.1       |                 |
| TC0X00006708.hg.1       | snoU13          |
| TSUnmapped00000198.hg.1 | ZNF852          |
| TC1900008530.hg.1       | smeetee         |
| TC0100010707.hg.1       | RP11-492I21.1   |
| TC1200008132.hg.1       | C1GALT1P1       |
| TC1200007996.hg.1       | swyner          |
| TC1100012221.hg.1       |                 |
| TC1100008737.hg.1       | AP000648.5      |
| TC1800007641.hg.1       |                 |
| TC0800009815.hg.1       | nuslarbu        |
| TC1400006656.hg.1       | OXA1L           |
| TC0100007462.hg.1       | kawlybu         |
| TC0300008737.hg.1       | movawbo         |
| TC1500007025.hg.1       | zapor           |
| TC1200009760.hg.1       | rostee          |
| TC0800011172.hg.1       | MTERF3          |
| TC0900011379.hg.1       | MEGF9           |
| TC1200006818.hg.1       |                 |
| TC0900007430.hg.1       |                 |
| TC0100008381.hg.1       |                 |
| TC2000007024.hg.1       | RP4-694B14.8    |
| TC1400010724.hg.1       | RP11-468E2.11   |
| TC0100017468.hg.1       | MIR320B2        |
| TSUnmapped00000572.hg.1 | RPS6KA1         |
| TC1900007697.hg.1       | TAF9P3          |
| TC2000007704.hg.1       | PARD6B          |
| TC0900011031.hg.1       | MRPL50          |

|                   |                                 |
|-------------------|---------------------------------|
| TC2200007831.hg.1 | LOC102723780; TCONS_l2_00031188 |
| TC0600007384.hg.1 | HIST1H2BO                       |
| TC1500006903.hg.1 | RP11-102L12.2                   |
| TC0900010897.hg.1 |                                 |
| TC0100010123.hg.1 | FDPS                            |
| TC0500010729.hg.1 |                                 |
| TC0200016369.hg.1 | DTYMK                           |
| TC1100009550.hg.1 | wokaby                          |
| TC1700011004.hg.1 | HOXB13                          |
| TC1000011422.hg.1 | sheesnu                         |
| TC0400010428.hg.1 | AC108933.1                      |
| TC1700012360.hg.1 | COX10-AS1                       |
| TC1400006864.hg.1 | blawswor                        |
| TC0500008631.hg.1 |                                 |
| TC1300009583.hg.1 | DOCK9                           |
| TC0500008547.hg.1 |                                 |
| TC0200008049.hg.1 | rarkawbu                        |
| TC1400006830.hg.1 | LOC100289177                    |
| TC1700008850.hg.1 |                                 |
| TC1000011016.hg.1 | Y_RNA                           |
| TC1000007360.hg.1 |                                 |
| TC0200016022.hg.1 | AC017104.1                      |
| TC0300010299.hg.1 | RAF1                            |
| TC0300011273.hg.1 | ARF4                            |
| TC0100015675.hg.1 |                                 |
| TC0200007518.hg.1 |                                 |
| TC0800011807.hg.1 |                                 |
| TC0800011808.hg.1 |                                 |
| TC1900011916.hg.1 | ZNF626                          |
| TC1900008753.hg.1 | TPM3P6                          |
| TC1100012225.hg.1 | NPAT                            |
| TC0700006956.hg.1 |                                 |
| TC0700013575.hg.1 | STAG3L3; STAG3L2                |
| TC0800012238.hg.1 | pyzarby                         |
| TC0900009331.hg.1 | TUBBP5                          |
| TC0100008130.hg.1 | NASP                            |
| TC0900006531.hg.1 | RCL1                            |
| TC1000009508.hg.1 | TUBB8                           |
| TC0600009868.hg.1 | ARMT1                           |
| TC1100011739.hg.1 | ALG8                            |
| TC0900010893.hg.1 | LINC00476                       |
| TC0100015899.hg.1 | TPM3                            |
| TC2100006975.hg.1 | sworju                          |

|                   |                |
|-------------------|----------------|
| TC2200008077.hg.1 | cheedoy        |
| TC0400007234.hg.1 | starswoybu     |
| TC1600009516.hg.1 | PKD1P6; NPIPP1 |
| TC0800008196.hg.1 |                |
| TC0800010589.hg.1 |                |
| TC1900008024.hg.1 | kuriru         |
| TC0100015302.hg.1 | RNU7-70P       |
| TC1700009489.hg.1 | ITGAE          |
| TC1200006850.hg.1 | ETV6           |
| TC0400009887.hg.1 | Y_RNA          |
| TC1000010930.hg.1 | PCBD1          |
| TC0900007219.hg.1 | berley         |
| TC0700011396.hg.1 |                |
| TC0700008328.hg.1 | RBM48          |
| TC0100007469.hg.1 | RPS6KA1        |
| TC1000011058.hg.1 |                |
| TC0200007008.hg.1 |                |
| TC0400011824.hg.1 | vusnerby       |
| TC0100012229.hg.1 |                |
| TC1900008314.hg.1 |                |
| TC1100008999.hg.1 | ZC3H12C        |
| TC1000007324.hg.1 | shoklubu       |
| TC0200013126.hg.1 | AC104135.2     |
| TC0300010928.hg.1 | LIMD1-AS1      |
| TC1900007613.hg.1 |                |
| TC1700007384.hg.1 | SNORD4A        |
| TC0200012211.hg.1 |                |
| TC2200007503.hg.1 |                |
| TC0400008175.hg.1 | PDLIM5         |
| TC0400008557.hg.1 | USP53          |
| TC0100015991.hg.1 | SMG5           |
| TC0700010797.hg.1 |                |
| TC0300010274.hg.1 | TAMM41         |
| TC0400010415.hg.1 |                |
| TC1100006601.hg.1 |                |
| TC0900012271.hg.1 |                |
| TC0900007523.hg.1 |                |
| TC1200010627.hg.1 |                |
| TC1600007176.hg.1 | nyseybo        |
| TC0300010540.hg.1 | TOP2B; MIR4442 |
| TC0700010464.hg.1 | rytorbo        |
| TC1200008471.hg.1 | myjoby         |
| TC0800010702.hg.1 | shakor         |

|                                        |                              |
|----------------------------------------|------------------------------|
| TC0100009790.hg.1                      | klypeybo                     |
| TC0700012289.hg.1                      |                              |
| TC1700010296.hg.1                      | beychee                      |
| TC1300009105.hg.1                      |                              |
| TC1500006676.hg.1                      |                              |
| TC0500010320.hg.1                      | RP11-184E9.4                 |
| TC0400012697.hg.1                      | RNU6-173P                    |
| TC0700013322.hg.1                      |                              |
| TC1300008714.hg.1                      | CALM2P3                      |
| TC2200007426.hg.1                      | teetey                       |
| TC0800012245.hg.1                      | ZNF250                       |
| TC1600010641.hg.1                      | CTD-2012K14.3; CTD-2012K14.4 |
| TC1400008083.hg.1                      |                              |
| TC1700008103.hg.1                      |                              |
| TC0400011202.hg.1                      | COQ2                         |
| TC1500008981.hg.1                      |                              |
| TC1600009945.hg.1                      | CTD-2574D22.3                |
| TC1700007395.hg.1                      | jyslar                       |
| TC0200008221.hg.1                      | plorstuby                    |
| TC0100011665.hg.1                      | 1-Mar                        |
| TC0100016936.hg.1                      |                              |
| TC0200015669.hg.1                      |                              |
| TC1100009450.hg.1                      | DCPS                         |
| TC0100017344.hg.1                      | luber                        |
| TC0500008016.hg.1                      | hohome                       |
| TC0500011315.hg.1                      | RPS23P5                      |
| TC4_GL000008v2_random0<br>0006440.hg.1 | sworzerbo                    |
| TC0800010265.hg.1                      | glerkor                      |
| TC0800006965.hg.1                      | paweyby                      |
| TC1300006483.hg.1                      |                              |
| TC0X00008059.hg.1                      |                              |
| TC0200011707.hg.1                      |                              |
| TC2200007318.hg.1                      | H1F0                         |
| TC1600010771.hg.1                      | spusnee                      |
| TC2100008277.hg.1                      | nerbaw                       |
| TC1800009029.hg.1                      | CYB5A                        |
| TC1500007170.hg.1                      | RP11-485O10.2; glygloy       |
| TC1600009762.hg.1                      | gosnu                        |
| TC1700012159.hg.1                      | forwor                       |
| TC1900010509.hg.1                      | reechaw                      |
| TC0X00008246.hg.1                      | SLC25A43                     |
| TC0100010732.hg.1                      | RP11-568K15.2                |

|                   |               |
|-------------------|---------------|
| TC0600006870.hg.1 | SNRNP48       |
| TC0600007947.hg.1 | ANKRD18EP     |
| TC0400006445.hg.1 | AC079140.1    |
| TC1300007859.hg.1 |               |
| TC1900006611.hg.1 | AC005944.2    |
| TC0700007871.hg.1 | wergoy        |
| TC0900008092.hg.1 | loysawby      |
| TC0200009442.hg.1 | faderbu       |
| TC0100011666.hg.1 | buzubo        |
| TC1500007661.hg.1 | slarzo        |
| TC2200008668.hg.1 |               |
| TC0X00006623.hg.1 | PRPS2         |
| TC0900012034.hg.1 |               |
| TC1100008193.hg.1 | teymey        |
| TC1200012264.hg.1 | moswee        |
| TC0300010398.hg.1 |               |
| TC1200008518.hg.1 | danee         |
| TC1100012733.hg.1 |               |
| TC0200008536.hg.1 | ANKRD36       |
| TC1200007888.hg.1 | sareri        |
| TC0700008584.hg.1 | AP1S1         |
| TC1200010551.hg.1 | RP1-197B17.5  |
| TC1700011820.hg.1 | SRSF2; MIR636 |
| TC0300012128.hg.1 |               |
| TC1200006505.hg.1 | rucho         |
| TC1900009619.hg.1 | CTD-2369P2.4  |
| TC1900010221.hg.1 | ZNF681        |
| TC1900006512.hg.1 |               |
| TC1500008033.hg.1 |               |
| TC0100009324.hg.1 | FAM102B       |
| TC1200008792.hg.1 | UNG           |
| TC0200007023.hg.1 | swawgloy      |
| TC0200010412.hg.1 | stagabu       |
| TC0900008263.hg.1 |               |
| TC1700010859.hg.1 | DCAKD         |
| TC2200008227.hg.1 | sarfaw        |
| TC1000010567.hg.1 | charsho       |
| TC0100013748.hg.1 | GNL2          |
| TC1600008255.hg.1 |               |
| TC1900009094.hg.1 | AC009005.2    |
| TC1700010951.hg.1 | snuslaw       |
| TC1700010136.hg.1 |               |
| TC0700012693.hg.1 |               |

|                                         |                           |
|-----------------------------------------|---------------------------|
| TC1100010034.hg.1                       |                           |
| TC0400010691.hg.1                       |                           |
| TC1900010205.hg.1                       |                           |
| TC0100017852.hg.1                       | swoyrarbo                 |
| TC0700007168.hg.1                       |                           |
| TSUnmapped00000926.hg.1                 |                           |
| TC0800009573.hg.1                       |                           |
| TC0300012406.hg.1                       | sperborbu                 |
| TC1400010317.hg.1                       | CKB                       |
| TC0200010734.hg.1                       | PKI55; RP11-566E18.3      |
| TC0300006584.hg.1                       |                           |
| TC0200008534.hg.1                       | ANKRD36                   |
| TC0400010422.hg.1                       | GAF3                      |
| TC0100007678.hg.1                       | HDAC1                     |
| TC0X00009619.hg.1                       | RP11-1148L6.5             |
| TC1700008065.hg.1                       |                           |
| TC0900010030.hg.1                       |                           |
| TC0800010699.hg.1                       |                           |
| TC0700006781.hg.1                       | BZW2                      |
| TC0100013482.hg.1                       | SNORD99                   |
| TC0300010397.hg.1                       |                           |
| TC1200010271.hg.1                       | DDX11-AS1                 |
| TC0400006437.hg.1                       | ZNF718                    |
| TC0100016655.hg.1                       | shawbu                    |
| TC0500013271.hg.1                       | LOC728554; THOC3          |
| TC14_GL000009v2_random<br>00006434.hg.1 |                           |
| TC0800008388.hg.1                       | shervyby                  |
| TC0800008185.hg.1                       | swuly                     |
| TC2100006571.hg.1                       | flabor                    |
| TC0300011734.hg.1                       | weespyby                  |
| TC1600009946.hg.1                       | CTD-2574D22.4             |
| TC1500009161.hg.1                       |                           |
| TC1400009636.hg.1                       |                           |
| TC0500010894.hg.1                       | DIMT1                     |
| TC1800007865.hg.1                       | jawwu                     |
| TC1200010362.hg.1                       |                           |
| TSUnmapped00000756.hg.1                 | ULK4P2                    |
| TC1000008623.hg.1                       | toypeeby                  |
| TC0700008063.hg.1                       | SPDYE5                    |
| TC0700013189.hg.1                       | marzerby                  |
| TC0400012375.hg.1                       | CBR4                      |
| TC0800007012.hg.1                       | LOC389641; RP11-1149O23.3 |

|                         |                                 |
|-------------------------|---------------------------------|
| TC1600008506.hg.1       | RP11-358L22.3                   |
| TC1200011191.hg.1       | SNORA70G                        |
| TC1700009502.hg.1       |                                 |
| TC0700008542.hg.1       | MEPCE                           |
| TC0100007559.hg.1       | RCC1; SNORA73A; SNHG3; SNORA73B |
| TC0900010462.hg.1       | RFK                             |
| TC0100015769.hg.1       | speykubo                        |
| TC1700010473.hg.1       |                                 |
| TC1200011720.hg.1       | NUP37                           |
| TC1700012340.hg.1       | NUP88                           |
| TC0300010991.hg.1       | bawfeybo                        |
| TC0600011132.hg.1       | U91328.1                        |
| TC0300006570.hg.1       | RP11-1020A11.2                  |
| TC1600011293.hg.1       |                                 |
| TC1100011751.hg.1       | NARS2                           |
| TC0100014662.hg.1       | smarplo                         |
| TC1800007896.hg.1       | RP11-715F3.2                    |
| TC1900010047.hg.1       | NR2C2AP                         |
| TC1200010798.hg.1       | AAAS                            |
| TC0800011472.hg.1       | NUDCD1                          |
| TC0600011377.hg.1       | NRM                             |
| TC0100011512.hg.1       | DTL                             |
| TC0800009970.hg.1       | PBK                             |
| TC0200006677.hg.1       | RRM2                            |
| TSUnmapped00000293.hg.1 | RCC2                            |
| TC0600008630.hg.1       | TTK                             |
| TC0500009281.hg.1       | PTTG1                           |
| TC2000007503.hg.1       | UBE2C                           |
| TC0900007863.hg.1       | CKS2                            |
| TC1200009759.hg.1       | CDCA3                           |
| TC1200010650.hg.1       | RACGAP1                         |
| TC1700010618.hg.1       | TOP2A                           |
| TC1700012285.hg.1       | PRR11                           |
| TC1200008597.hg.1       | GAS2L3                          |
| TC1100008913.hg.1       |                                 |
| TC0700009145.hg.1       | MEST                            |
| TC0100016831.hg.1       | ASPM                            |
| TSUnmapped00000413.hg.1 | RP1-20B21.4                     |
| TC1000007748.hg.1       | CDK1                            |
| TC1100012121.hg.1       | TMEM123                         |
| TC0100007110.hg.1       | RP1-20B21.4; kuplo              |
| TC0X00007537.hg.1       | KIF4A                           |
| TC0200016099.hg.1       | HJURP                           |



|                         |               |
|-------------------------|---------------|
| TSUnmapped00000127.hg.1 | KIF15         |
| TC1000012525.hg.1       | ACBD7         |
| TC0100016952.hg.1       | UBE2T         |
| TC1900011226.hg.1       | KLK4          |
| TC0100015509.hg.1       | FAM72B        |
| TC0100012172.hg.1       | EXO1          |
| TC0800011148.hg.1       | CCNE2         |
| TC1700009043.hg.1       | BIRC5         |
| TC1200010946.hg.1       | NEMP1         |
| TC0100017095.hg.1       | speymorbo     |
| TC0100015310.hg.1       | SLC16A1       |
| TC0600007273.hg.1       | HIST1H1E      |
| TC0200016642.hg.1       | RP11-458N5.1  |
| TC1700007790.hg.1       | CDC6          |
| TC0100017216.hg.1       | NEK2          |
| TC0X00009582.hg.1       | UXT           |
| TC1100013075.hg.1       | DDIAS         |
| TC1900011470.hg.1       | UBE2S         |
| TC1200010961.hg.1       | NDUFA4L2      |
| TC0Y00007295.hg.1       | sybo          |
| TC0Y00007300.hg.1       | shorbo        |
| TC0Y00007302.hg.1       | pleybo        |
| TC0Y00007304.hg.1       | pabo          |
| TC1900009807.hg.1       | ASF1B         |
| TC0100008101.hg.1       | KIF2C         |
| TC1200011420.hg.1       | SLC6A15       |
| TC1300008371.hg.1       | CENPJ         |
| TC0100013700.hg.1       | CLSPN         |
| TC0600011231.hg.1       | Z98744.2      |
| TC0600007565.hg.1       | TCF19         |
| TC0600014348.hg.1       | NHSL1         |
| TC1500010715.hg.1       | BUB1B         |
| TC2200008189.hg.1       | DERL3         |
| TC0400011620.hg.1       | ZGRF1         |
| TC2000007135.hg.1       | RP5-1085F17.3 |
| TC0300013458.hg.1       | RPL39L        |
| TC0800009922.hg.1       |               |
| TC1800006448.hg.1       | TYMS          |
| TC1200007856.hg.1       | TMEM194A      |
| TC1700007374.hg.1       | kloyslo       |
| TC1500010707.hg.1       | ARHGAP11B     |
| TC2000009550.hg.1       | AURKA         |
| TC1200008843.hg.1       | FAM216A       |

|                   |                       |
|-------------------|-----------------------|
| TC0300011360.hg.1 | PTPRG-AS1             |
| TC1000010986.hg.1 | RP11-442H21.2         |
| TC0800010919.hg.1 | CKS1BP7               |
| TC0900009456.hg.1 | RLN2                  |
| TC0100009900.hg.1 | CIART                 |
| TC0100010100.hg.1 | CKS1B                 |
| TC0800009323.hg.1 |                       |
| TC0200013912.hg.1 | CKAP2L                |
| TC1500008451.hg.1 | CTD-2027G2.1          |
| TC1100013184.hg.1 | CDCA5                 |
| TC1700007469.hg.1 | ATAD5                 |
| TC1500007237.hg.1 | SCG3                  |
| TC0500010896.hg.1 | CKS1BP3               |
| TC1800007355.hg.1 | C18orf54              |
| TC1900007098.hg.1 | RNASEH2A              |
| TC1100006967.hg.1 | RP1-239B22.5          |
| TC1200007832.hg.1 | NABP2                 |
| TC1800007316.hg.1 | SKA1                  |
| TC0100015714.hg.1 | SV2A                  |
| TC1000012499.hg.1 |                       |
| TC0400012433.hg.1 | RP11-798M19.6; fleegy |
| TC2200008367.hg.1 | CHEK2                 |
| TC0500012166.hg.1 | CDC25C                |
| TC0700008263.hg.1 | DBF4                  |
| TC1700008021.hg.1 |                       |
| TC0100017218.hg.1 | jerrerbo              |
| TC2000008314.hg.1 |                       |
| TC1200008643.hg.1 | marjawby              |
| TC0200014845.hg.1 | SPC25                 |
| TC1200009553.hg.1 | saswer                |
| TC0800008254.hg.1 | blarboyby             |
| TC0900008227.hg.1 | kumire                |
| TC0600007700.hg.1 | KIFC1                 |
| TC0300012475.hg.1 | TOPBP1                |
| TC0800010630.hg.1 | GGH                   |
| TC0400011477.hg.1 | CENPE                 |
| TC0600007138.hg.1 | E2F3                  |
| TC1300009088.hg.1 | DIAPH3                |
| TC0600009111.hg.1 | tawglorby             |
| TC1000007156.hg.1 | RP11-192N10.2         |
| TC0100014660.hg.1 | FUBP1                 |
| TC1700008719.hg.1 | KPNA2                 |
| TC2100007795.hg.1 | LINC00515             |

|                   |                                                                                  |
|-------------------|----------------------------------------------------------------------------------|
| TC0600011187.hg.1 | AL021807.1                                                                       |
| TC1200009868.hg.1 | DDX12P; DDX11                                                                    |
| TC1400009710.hg.1 | ACYP1                                                                            |
| TC0100014432.hg.1 | DLEU2_5                                                                          |
| TC1600006904.hg.1 | RMI2                                                                             |
| TC1100013071.hg.1 | POLD3                                                                            |
| TC1200008642.hg.1 | PARPBP                                                                           |
| TC0200016442.hg.1 | MSH2                                                                             |
| TC1200008598.hg.1 | reyglawby                                                                        |
| TC1100006966.hg.1 | NCR3LG1                                                                          |
| TC0100014428.hg.1 | ITGB3BP                                                                          |
| TC0500008107.hg.1 | SLF1                                                                             |
| TC0100007378.hg.1 | CLIC4                                                                            |
| TC1100011109.hg.1 | SNORD22; SNORD29; SNORD31; SNORD30; SNORD28; SNORD27;<br>SNORD26; SNORD25; SNHG1 |
| TC0X00011368.hg.1 | SSX2; SSX2B                                                                      |
| TC1900010675.hg.1 | FBL                                                                              |
| TC1000010794.hg.1 | DBF4P1                                                                           |
| TC1100009239.hg.1 | AP003391.1                                                                       |
| TC1400008705.hg.1 | SLC7A8                                                                           |
| TC1100013022.hg.1 | FADS2                                                                            |
| TC1600008567.hg.1 | CENPN                                                                            |
| TC1900007591.hg.1 |                                                                                  |
| TC1800007213.hg.1 |                                                                                  |
| TC1000008798.hg.1 | SFR1                                                                             |
| TC1300007194.hg.1 | DLEU2_4                                                                          |
| TC0X00007397.hg.1 | LINC01420                                                                        |
| TC1300006739.hg.1 |                                                                                  |
| TC0300007223.hg.1 | KIF15                                                                            |
| TC1200010105.hg.1 | RECQL                                                                            |
| TC0100014228.hg.1 | LRP8                                                                             |
| TC1200010566.hg.1 | SENP1                                                                            |
| TC0Y00007298.hg.1 | skybor                                                                           |
| TC0700012959.hg.1 | EZH2                                                                             |
| TC0900011156.hg.1 |                                                                                  |
| TC0700011552.hg.1 | keysmeebu                                                                        |
| TC0700009042.hg.1 | RP11-62J1.3                                                                      |
| TC1400009829.hg.1 | CEP128                                                                           |
| TC1300006849.hg.1 | RP11-142E9.1                                                                     |
| TC0100007512.hg.1 | GPR3                                                                             |
| TC0700012661.hg.1 | ploybler                                                                         |
| TC1200012143.hg.1 | CIT; MIR1178                                                                     |
| TC1300007196.hg.1 | DLEU2_6                                                                          |

|                   |                                 |
|-------------------|---------------------------------|
| TC0900009347.hg.1 | kawspaw                         |
| TC1700009870.hg.1 | UBE2S; UBE2SP1                  |
| TC1300008938.hg.1 | DLEU2; MIR15A; MIR16-1; MIR3613 |
| TC1600011494.hg.1 | ARL6IP1                         |
| TC0700011769.hg.1 | glorsmerbu                      |
| TC0100013071.hg.1 | MFAP2                           |
| TC0700010466.hg.1 | nacheeby                        |
| TC1200006700.hg.1 | FOXJ2                           |
| TC1900007515.hg.1 | ZNF738                          |
| TC0500008312.hg.1 | STARD4-AS1                      |
| TC0700010247.hg.1 | RPA3                            |
| TC1200012652.hg.1 |                                 |
| TC0100015707.hg.1 | HIST2H4A; HIST2H4B              |
| TC1300007192.hg.1 | DLEU2_3                         |
| TC1400007174.hg.1 | RP11-589M4.1                    |
| TC1600011399.hg.1 | MT1X                            |
| TC0X00010578.hg.1 | bygar                           |
| TC0X00010585.hg.1 | florgar                         |
| TC1400008992.hg.1 |                                 |
| TC1400008055.hg.1 | IFI27L1                         |
| TC0100007841.hg.1 | CDCA8                           |
| TC0800012349.hg.1 | MTBP                            |
| TC1800008683.hg.1 |                                 |
| TC0700011329.hg.1 |                                 |
| TC1900006861.hg.1 | CTD-3193O13.11                  |
| TC0800007459.hg.1 | POMK                            |
| TC0100009953.hg.1 | RP11-126K1.8; skorporbo         |
| TC0800007086.hg.1 | DPYSL2                          |
| TC0800007732.hg.1 | toyskoybu                       |
| TC0100015553.hg.1 | plawbey                         |
| TC0100010553.hg.1 | C1orf112                        |
| TC1100010255.hg.1 | nykoyby                         |
| TC0600011075.hg.1 | glosoby                         |
| TC2200007312.hg.1 | LGALS1                          |
| TC1000007092.hg.1 | MASTL                           |
| TC0600008134.hg.1 |                                 |
| TC0X00010465.hg.1 | NUP62CL                         |
| TC0500011868.hg.1 |                                 |
| TC1200007864.hg.1 | NXPH4                           |
| TC0700012221.hg.1 | SLC26A3                         |
| TC1200008883.hg.1 | LOC100101246                    |
| TC1300009673.hg.1 | TEX30                           |
| TC0200016563.hg.1 | KLHL23                          |

|                         |                |
|-------------------------|----------------|
| TC0900009458.hg.1       | RLN1           |
| TC0X00010586.hg.1       | spagar         |
| TC0100015058.hg.1       | SASS6          |
| TC0500013320.hg.1       | GTF2H2         |
| TC0100018440.hg.1       | STIL           |
| TC0200013785.hg.1       | MIR548AU       |
| TC1200012337.hg.1       | sugawby        |
| TC2200008704.hg.1       | DMC1           |
| TC1500006571.hg.1       |                |
| TC0700013618.hg.1       | MGC27345       |
| TC0600009927.hg.1       |                |
| TC0400012964.hg.1       | SCLT1          |
| TC0300006613.hg.1       | FANCD2P2       |
| TC2200007662.hg.1       | GTSE1          |
| TC1200010625.hg.1       |                |
| TC0100017297.hg.1       | forloybo       |
| TC1600010168.hg.1       | SHCBP1         |
| TC0X00007314.hg.1       | RP11-258C19.7  |
| TC0600011543.hg.1       |                |
| TC1600007612.hg.1       | RP11-19N8.3    |
| TC0600007260.hg.1       | U91328.22      |
| TC0200016504.hg.1       | CCDC138        |
| TC1600007962.hg.1       | MT1A           |
| TC1500008485.hg.1       | IGF1R          |
| TC1000012011.hg.1       | RGS10          |
| TC0800007066.hg.1       |                |
| TC1700009974.hg.1       | SHMT1; MIR6778 |
| TC0700010259.hg.1       |                |
| TC1500007616.hg.1       | ZWILCH         |
| TC1600007966.hg.1       | MT1H           |
| TC1700009041.hg.1       |                |
| TC1500008946.hg.1       | wareru         |
| TC0700009807.hg.1       | INSIG1         |
| TC0100009561.hg.1       | TTF2           |
| TC1300008517.hg.1       | HMGB1          |
| TC0X00007298.hg.1       | SSX2B          |
| TC0800006488.hg.1       | ARHGEF10       |
| TSUnmapped00000242.hg.1 | KIF15          |
| TC0900012141.hg.1       | GCNT1          |
| TC1500009522.hg.1       | MNS1           |
| TC0100006707.hg.1       | CAMTA1         |
| TC0600007376.hg.1       | AL049822.1     |
| TC1700007641.hg.1       | DHRS11         |

|                   |               |
|-------------------|---------------|
| TC0700006567.hg.1 | TTYH3         |
| TC0700007400.hg.1 | boklarby      |
| TC1100006644.hg.1 | RRM1          |
| TC0X00010387.hg.1 | TMSB15A       |
| TC0600013206.hg.1 | SLC18B1       |
| TC0100007981.hg.1 |               |
| TC1500008328.hg.1 | BLM           |
| TC0X00010877.hg.1 | FAM122B       |
| TC0300006820.hg.1 | HMGB1P5       |
| TC1600010352.hg.1 | floyry        |
| TC0100014202.hg.1 | ORC1          |
| TC0800007416.hg.1 | GINS4         |
| TC0700006923.hg.1 | AC079780.3    |
| TC0900009948.hg.1 | ARHGEF39      |
| TC0300006573.hg.1 | EMC3-AS1      |
| TC1200008813.hg.1 | RP11-837J7.4  |
| TC2000006811.hg.1 | sporsaw       |
| TC1400009999.hg.1 |               |
| TC0300011943.hg.1 | KIAA1524      |
| TC1500006692.hg.1 | HMG2P5        |
| TC0400012951.hg.1 | SLC9B2        |
| TC1700006592.hg.1 | GSG2          |
| TC1600011467.hg.1 | PKMYT1        |
| TC0100015562.hg.1 | skawybo       |
| TC1900007496.hg.1 |               |
| TC1500006965.hg.1 | RAD51         |
| TC2100007316.hg.1 | H2BFS         |
| TC1200006444.hg.1 | CCDC77        |
| TC0100010183.hg.1 | furerbu       |
| TC0700013050.hg.1 | KCNH2         |
| TC1000009163.hg.1 | LOC399815     |
| TC1300008723.hg.1 |               |
| TC0900008493.hg.1 |               |
| TC0900007663.hg.1 | CEP78         |
| TC1400006822.hg.1 | choymeeby     |
| TC0100011367.hg.1 | royaro        |
| TC1200008793.hg.1 |               |
| TC0100012283.hg.1 | RP11-397A15.4 |
| TC1400006459.hg.1 | CTD-2314B22.1 |
| TC0600009322.hg.1 | HSF2          |
| TC0100007931.hg.1 | sorpubu       |
| TC0300014075.hg.1 | TRIM59        |
| TC0600014139.hg.1 | PRIM2         |

|                   |                                                     |
|-------------------|-----------------------------------------------------|
| TC0700009331.hg.1 |                                                     |
| TC0500011188.hg.1 | HMGN2P4                                             |
| TC0900011668.hg.1 | NUP188                                              |
| TC0200012643.hg.1 | CCDC88A                                             |
| TC1000012132.hg.1 |                                                     |
| TC1600007961.hg.1 | MT1JP                                               |
| TC1600010348.hg.1 | RP11-36I17.2                                        |
| TC1400007500.hg.1 | ARG2                                                |
| TC1100011069.hg.1 |                                                     |
| TC0400012358.hg.1 |                                                     |
| TC0400008441.hg.1 |                                                     |
| TC0100013289.hg.1 | flawlarbo                                           |
| TC0100007858.hg.1 | UTP11L                                              |
| TC1200010917.hg.1 | TIMELESS                                            |
| TC1100009103.hg.1 | mochoy                                              |
| TC1200008490.hg.1 | RN7SL330P                                           |
| TC0700008430.hg.1 | SDHAF3                                              |
| TC1200012243.hg.1 |                                                     |
| TC0300007480.hg.1 | blofoybo                                            |
| TC1200009088.hg.1 | RP11-364C11.3                                       |
| TC1600010080.hg.1 | kerper                                              |
| TC1000010847.hg.1 | DNA2                                                |
| TC1700007938.hg.1 | RPL21P4                                             |
| TC0200008809.hg.1 | AC073415.2                                          |
| TC0100014243.hg.1 | NDC1                                                |
| TC1600011408.hg.1 | CKLF; CKLF-CMTM1                                    |
| TC1600010421.hg.1 | MT1G                                                |
| TC1200011009.hg.1 |                                                     |
| TC0100008812.hg.1 | PTGFR                                               |
| TC1100007217.hg.1 | QSER1                                               |
| TC0X00009064.hg.1 | RP11-120D5.1; TCONS_00016946; TCONS_00017038; perva |
| TC0100007367.hg.1 |                                                     |
| TC0500011988.hg.1 | doyslerby                                           |
| TC1100009871.hg.1 |                                                     |
| TC1600007955.hg.1 | MT3                                                 |
| TC0100009333.hg.1 | GPSM2                                               |
| TC1600011186.hg.1 | SLC7A5                                              |
| TC1900007530.hg.1 |                                                     |
| TC1200006447.hg.1 | LOC100049716; RP11-218M22.1                         |
| TC1100011051.hg.1 | plychoy                                             |
| TC0800008681.hg.1 | gychoby                                             |
| TC2100007485.hg.1 | CH507-42P11.1                                       |
| TC1800009258.hg.1 | ZNF519                                              |

|                         |                       |
|-------------------------|-----------------------|
| TC0300011009.hg.1       | CDC25A                |
| TC1100012949.hg.1       | IFITM1                |
| TC1100011480.hg.1       | flyglarbu             |
| TSUnmapped00000518.hg.1 | RP11-110I1.12         |
| TC0X00008747.hg.1       | GABRQ                 |
| TC1200007616.hg.1       | chawjorby             |
| TC0700009488.hg.1       | CASP2                 |
| TC0100014434.hg.1       | DLEU2_3               |
| TC0200014927.hg.1       |                       |
| TC0300008748.hg.1       | sikeyu                |
| TC0600014233.hg.1       | SSR1                  |
| TC1200012697.hg.1       | RN7SL737P             |
| TC0700011698.hg.1       | TMEM243               |
| TC0800009750.hg.1       |                       |
| TC1800009011.hg.1       | NETO1                 |
| TC0900010930.hg.1       | yomemu                |
| TC0X00008127.hg.1       |                       |
| TC0300011732.hg.1       | veedubo               |
| TC1200007540.hg.1       | RP11-386G11.3; kareri |
| TC2200009270.hg.1       | APOBEC3B              |
| TC0100015711.hg.1       | HIST2H2AB             |
| TC0100007463.hg.1       | HMG2                  |
| TC1100008445.hg.1       | fluchor               |
| TC1600009102.hg.1       | RNPS1                 |
| TC0600011697.hg.1       | CCDC167               |
| TC1100010979.hg.1       | fleyspoyby            |
| TC2100008499.hg.1       | SMIM11A               |
| TC0200008791.hg.1       | AC009963.4            |
| TC0X00009117.hg.1       | FANCB                 |
| TC1900006870.hg.1       | CTD-3193O13.14        |
| TC0200009978.hg.1       | PDK1                  |
| TC1500008945.hg.1       |                       |
| TC1100007053.hg.1       | RP11-701I24.1         |
| TC1200011853.hg.1       | doytubo               |
| TC0500008878.hg.1       | PCDHB17P              |
| TC1600009803.hg.1       | HMG2P3                |
| TC1600007019.hg.1       | AF001548.5            |
| TC1900011920.hg.1       | ZNF98                 |
| TC1600011383.hg.1       | TMEM265; SRCAP        |
| TC0400008183.hg.1       | BMP1B                 |
| TC0300009452.hg.1       | RP11-362K14.7         |
| TC0200015269.hg.1       | wawdu                 |
| TC0100009658.hg.1       | SRGAP2C               |



|                   |                          |
|-------------------|--------------------------|
| TC1500006569.hg.1 | SNORD108; SNORD64; PWAR5 |
| TC1900008099.hg.1 |                          |
| TC2100006435.hg.1 | RP11-717F1.2             |
| TC1900007620.hg.1 | CTB-92J24.2              |
| TC1500010914.hg.1 | HDGFRP3                  |
| TC0100009145.hg.1 | swoplo                   |
| TC0800012456.hg.1 | RP11-383J24.6            |
| TC2000008242.hg.1 | RNF24                    |
| TC0X00011326.hg.1 | HPRT1                    |
| TC0400011540.hg.1 | wybobo                   |
| TC1500009227.hg.1 | AC011330.13              |
| TC1400009667.hg.1 | RP4-693M11.3             |
| TC1700007134.hg.1 | UBE2SP2                  |
| TC0500012213.hg.1 | CTD-2062A1.2             |
| TC0400012251.hg.1 | C4orf46                  |
| TC1900011835.hg.1 | AC005943.5               |
| TC1500009050.hg.1 | RP11-1008C21.2           |
| TC2100006460.hg.1 | SMIM11A                  |
| TC0800010274.hg.1 |                          |
| TC0400008569.hg.1 | gluswoby                 |
| TC1100009126.hg.1 |                          |
| TC0100016929.hg.1 | vukobu                   |
| TC1200012244.hg.1 |                          |
| TC1900011113.hg.1 | GYS1                     |
| TC0800007640.hg.1 | RP11-463C14.1            |
| TC0100011349.hg.1 |                          |
| TC0800009425.hg.1 | MIR4659B                 |
| TC2000006452.hg.1 | pytaw                    |
| TC0100012222.hg.1 | DESI2                    |
| TC0900008530.hg.1 | stawswu                  |
| TC1200011696.hg.1 | nemiri                   |
| TC0700012273.hg.1 | cherkaw                  |
| TC0500012799.hg.1 |                          |
| TC0200010295.hg.1 | shystoyby                |
| TC0300009315.hg.1 | sloygobu                 |
| TC1300007483.hg.1 | BORA                     |
| TC0500006481.hg.1 |                          |
| TC1000007798.hg.1 | plunyby                  |
| TC0900007742.hg.1 | Y_RNA                    |
| TC0300010993.hg.1 | gafeybo                  |
| TC0500007295.hg.1 | keyfley                  |
| TC0100017523.hg.1 | LIN9                     |
| TC1700011472.hg.1 | RP11-583F2.6             |

|                   |                               |
|-------------------|-------------------------------|
| TC0700008699.hg.1 | porkaw                        |
| TC1200010932.hg.1 | voychy                        |
| TC0500012975.hg.1 | DBN1                          |
| TC0100016018.hg.1 | CRABP2                        |
| TC1100008969.hg.1 | ELMOD1                        |
| TC1300007191.hg.1 | DLEU2_2                       |
| TC0300010403.hg.1 | HMG2P7                        |
| TC0800012386.hg.1 | PINX1; MIR1322                |
| TC1800007667.hg.1 | TIMM21                        |
| TC0100018081.hg.1 | ZNF670; ZNF695; ZNF670-ZNF695 |
| TC1600011527.hg.1 | VKORC1                        |
| TC0100013297.hg.1 | warlee                        |
| TC0600010918.hg.1 | mowame; RP3-467D16.3          |
| TC1600007591.hg.1 | RP11-67H24.3                  |
| TC0600011457.hg.1 | LSM2                          |
| TC0X00010804.hg.1 | ZNF280C                       |
| TC0100016786.hg.1 | UCHL5                         |
| TC1200007756.hg.1 | RP11-968A15.2                 |
| TC2000008894.hg.1 | E2F1                          |
| TC0700008265.hg.1 | ADAM22                        |
| TC1600010072.hg.1 |                               |
| TC0300012164.hg.1 | POLQ                          |
| TC1400009103.hg.1 | RP11-649E7.8                  |
| TC1400008555.hg.1 | gavu                          |
| TC0500012388.hg.1 | DPYSL3                        |
| TC1100007003.hg.1 | LDHA                          |
| TC0700009985.hg.1 | skeysleybu                    |
| TC0200015643.hg.1 | BARD1                         |
| TC0X00011319.hg.1 | TMSB15B                       |
| TC1100008324.hg.1 | OR7E128P                      |
| TC0800009830.hg.1 | REEP4                         |
| TC1200009218.hg.1 | woytybo                       |
| TC1400007370.hg.1 | RP11-307P22.1                 |
| TC0300006794.hg.1 | lerdoybo                      |
| TC2000009261.hg.1 | rervey                        |
| TC1000008406.hg.1 | KIF20B                        |
| TC0200009994.hg.1 | CDCA7                         |
| TC0100007660.hg.1 | TMEM39B                       |
| TC0700008368.hg.1 | kahore                        |
| TC0400009222.hg.1 | spoberbo                      |
| TC0600008486.hg.1 | OGFRL1                        |
| TC1500010357.hg.1 |                               |
| TC1700007982.hg.1 | C17orf53                      |

|                   |                  |
|-------------------|------------------|
| TC0400008001.hg.1 |                  |
| TC0300010186.hg.1 | RAD18            |
| TC1200011903.hg.1 | flargeyby        |
| TC0800010036.hg.1 | gloyker          |
| TC1600007425.hg.1 | KIF22            |
| TC1400010630.hg.1 | TTLL5            |
| TC0400011167.hg.1 | RP11-127B20.2    |
| TC1600009938.hg.1 | AC009133.21      |
| TC1900010422.hg.1 | skorcho; sleecho |
| TC1500009148.hg.1 | OIP5             |
| TC2200008304.hg.1 | sweefu           |
| TC0400011520.hg.1 | yosume           |
| TC0300011276.hg.1 | DENND6A          |
| TC2000010001.hg.1 | PIGU             |
| TC1100008323.hg.1 | LOC100129216     |
| TC1700010420.hg.1 | SLFN11           |
| TC1400010700.hg.1 | SIVA1            |
| TC0300010498.hg.1 |                  |
| TC0700011333.hg.1 | RP11-328P23.3    |
| TC0100011187.hg.1 | muley            |
| TC0600012118.hg.1 | RP11-323I14__A.1 |
| TC0400010657.hg.1 | mawvobo          |
| TC2200008129.hg.1 | kopaw            |
| TC0600006862.hg.1 | RP11-69L16.4     |
| TC1900009810.hg.1 |                  |
| TC0200007932.hg.1 |                  |
| TC0400011169.hg.1 | zeeko            |
| TC1500006701.hg.1 | ULK4P3; ULK4P2   |
| TC0X00007542.hg.1 | plerby           |
| TC0500007330.hg.1 | klawbey          |
| TC1400007049.hg.1 |                  |
| TC0100018246.hg.1 | LRR8C            |
| TC1100012551.hg.1 |                  |
| TC1200011948.hg.1 | PCNPP1           |
| TC1200010782.hg.1 | tese             |
| TC1300008809.hg.1 | NUFIP1           |
| TC0200012741.hg.1 | watuyo           |
| TC1700007598.hg.1 | SNORD7           |
| TC0600007862.hg.1 | PIM1             |
| TC1700011304.hg.1 | MIR4737          |
| TC1700010072.hg.1 | RNASEH1P1        |
| TC2000007324.hg.1 | tatey            |
| TC1400009923.hg.1 |                  |

|                                  |                       |
|----------------------------------|-----------------------|
| TC1600011406.hg.1                | CKLF-CMTM1            |
| TC1700008232.hg.1                | PKK2                  |
| TC0100009059.hg.1                | neymeebo              |
| TC1600008025.hg.1                |                       |
| TC0300009609.hg.1                | ACTL6A                |
| TC0700010934.hg.1                | H2AFV                 |
| TC1000010647.hg.1                | smomoyby              |
| TC1200011721.hg.1                | nygleeby              |
| TCUn_KI270742v100006433<br>.hg.1 |                       |
| TC1700012212.hg.1                | CCDC144NL-AS1         |
| TC1600008457.hg.1                |                       |
| TC0500013429.hg.1                | RNF130                |
| TC0700007398.hg.1                | ZMIZ2                 |
| TC1900007592.hg.1                |                       |
| TC0100011487.hg.1                | TRAF5                 |
| TC0100011922.hg.1                |                       |
| TC2200008044.hg.1                | RNY1P9                |
| TC1100012504.hg.1                | RP11-110I1.12         |
| TC0200010137.hg.1                |                       |
| TC0100007316.hg.1                |                       |
| TC1100008503.hg.1                | RP11-111M22.4         |
| TC0300006543.hg.1                |                       |
| TC1000006858.hg.1                | HSPA14                |
| TC0500010081.hg.1                | FAM173B               |
| TC1500008886.hg.1                |                       |
| TC0300011154.hg.1                | POC1A                 |
| TC0X00011121.hg.1                | GABRE; MIR224; MIR452 |
| TC1200008525.hg.1                | SNRPF                 |
| TC0100018424.hg.1                | HNRNPR                |
| TC1000012600.hg.1                | FAM24B                |
| TC1200007272.hg.1                | dawchaw               |
| TC0700011964.hg.1                | lyneeby               |
| TC1100009080.hg.1                | rawglybu              |
| TC1600007959.hg.1                | MT1E                  |
| TC0900008601.hg.1                |                       |
| TC0100016832.hg.1                | SEPT14P12             |
| TC0400007975.hg.1                |                       |
| TC0100018084.hg.1                | mimaha                |
| TC1200008176.hg.1                | LGR5                  |
| TC0500010994.hg.1                | zawzorby              |
| TC2100007621.hg.1                | LOC100131399          |
| TC0300010059.hg.1                |                       |

|                   |                |
|-------------------|----------------|
| TC1100009618.hg.1 | GLB1L2         |
| TC1000011885.hg.1 | DCLRE1A        |
| TC0X00008437.hg.1 | STK26          |
| TC1400006872.hg.1 |                |
| TC0400006546.hg.1 | WHSC1          |
| TC0100012704.hg.1 | snarloybo      |
| TC0400010115.hg.1 | wawfloy        |
| TC1000011006.hg.1 | boymoby        |
| TC0300006725.hg.1 |                |
| TC1500008346.hg.1 | PRC1-AS1       |
| TC1300008940.hg.1 | swosheybu      |
| TC1400006476.hg.1 | CTD-2311B13.10 |
| TC0100014120.hg.1 | plarmawbu      |
| TC1100008655.hg.1 |                |
| TC1900008063.hg.1 |                |
| TC1400008772.hg.1 | HMGN2P6        |
| TC1900011697.hg.1 | ZNF730         |
| TC1600010850.hg.1 | kukiri         |
| TC0800006567.hg.1 | MIR4659A       |
| TC0900012212.hg.1 | PLIN2          |
| TC0100007690.hg.1 | RBBP4          |
| TC1500006513.hg.1 |                |
| TC0400012619.hg.1 |                |
| TC0600009967.hg.1 | swajee         |
| TC1900007570.hg.1 | ZNF492         |
| TC0100008089.hg.1 | plylybo        |
| TC0500007603.hg.1 |                |
| TC0100006469.hg.1 | LINC01128      |
| TC1100011740.hg.1 | RNU6-126P      |
| TC0700012597.hg.1 | wersloby       |
| TC1200012339.hg.1 | lucho          |
| TC0200006965.hg.1 | HMGN2P20       |
| TC0200012513.hg.1 | flojoybu       |
| TC1200011538.hg.1 |                |
| TC0300008133.hg.1 | CMSS1          |
| TC1200012338.hg.1 | THRIL          |
| TC1600007468.hg.1 | farweybu       |
| TC0500008567.hg.1 |                |
| TC1200006733.hg.1 | RP11-20D14.6   |
| TC0700012790.hg.1 |                |
| TC0800007900.hg.1 | keegarby       |
| TC0800008546.hg.1 | ENY2           |
| TC2000008315.hg.1 |                |

|                              |                            |
|------------------------------|----------------------------|
| TC0800008746.hg.1            | DUTP2                      |
| TC0200013655.hg.1            |                            |
| TC0800007109.hg.1            |                            |
| TC0100009144.hg.1            | skoroybo                   |
| TC1500008936.hg.1            | RP11-632K20.8              |
| TC1400010573.hg.1            |                            |
| TC0200011720.hg.1            | ODC1; SNORA80B             |
| TC1700009405.hg.1            | skorvybu                   |
| TC0400009228.hg.1            | sneyga                     |
| TC1300008941.hg.1            | chofarby                   |
| TC0900009887.hg.1            |                            |
| TC0800008641.hg.1            | MED30                      |
| TC0100009873.hg.1            | AC239868.3                 |
| TC1100010163.hg.1            |                            |
| TC0100011541.hg.1            |                            |
| TC2200008839.hg.1            | HMG2P10                    |
| TC2000008313.hg.1            | AL035461.1                 |
| TC1700010742.hg.1            | HMG2P15                    |
| TC1300006521.hg.1            |                            |
| TC1700011894.hg.1            | voskee                     |
| TC0500009274.hg.1            | FABP6                      |
| TC0200016353.hg.1            | jawklo                     |
| TCUn_KI270742v100006444.hg.1 | juzeybo                    |
| TC2100007488.hg.1            | CH507-24F1.2               |
| TC0100018291.hg.1            | FLG-AS1                    |
| TC1900007964.hg.1            | LINC01535                  |
| TC1700011303.hg.1            | AC005702.2                 |
| TC1400010717.hg.1            | PPP1R3E                    |
| TC1400007440.hg.1            | MTHFD1                     |
| TC0200010483.hg.1            | SNORD11                    |
| TC1900011382.hg.1            | MYADM                      |
| TC0100014762.hg.1            | SSX2IP                     |
| TC2000007060.hg.1            |                            |
| TC1700008129.hg.1            | Y_RNA                      |
| TC2000008516.hg.1            | SNX5                       |
| TC0100011667.hg.1            | RNU6ATAC35P; RP11-295M18.7 |
| TC0300009474.hg.1            | CLDN11                     |
| TC2200009182.hg.1            | DUXAP8                     |
| TC1400006461.hg.1            | DUXAP10; LINC01296         |
| TC2000009972.hg.1            | SNRPB                      |
| TC0700009697.hg.1            |                            |
| TC0200006682.hg.1            | kahimo                     |

|                   |                                    |
|-------------------|------------------------------------|
| TC0900011265.hg.1 |                                    |
| TC0100013405.hg.1 |                                    |
| TC1700008534.hg.1 |                                    |
| TC1200007628.hg.1 | RNU7-39P                           |
| TC0100016494.hg.1 | SCARNA3                            |
| TC0600012839.hg.1 | CDK19                              |
| TC1100012269.hg.1 | ARHGAP20                           |
| TC2000007188.hg.1 | MIR644A                            |
| TC1600006994.hg.1 | snysmor                            |
| TC0100009334.hg.1 | forreebo                           |
| TC1500008091.hg.1 | UBE2Q2P6                           |
| TC0X00010575.hg.1 | skafo                              |
| TC0X00010576.hg.1 | seevy                              |
| TC0X00010582.hg.1 | smygar                             |
| TC2100008424.hg.1 | SLC19A1                            |
| TC0400010633.hg.1 | spuflor                            |
| TC1400008364.hg.1 | wersyby                            |
| TC1300008945.hg.1 | gachy                              |
| TC1800006834.hg.1 | SNRPD1                             |
| TC0100007964.hg.1 | ZNF684                             |
| TC0200010608.hg.1 | raklu                              |
| TC0X00009782.hg.1 |                                    |
| TC1700008171.hg.1 | PRAC2                              |
| TC0500008157.hg.1 | LNPEP                              |
| TC0300010021.hg.1 |                                    |
| TC0100009659.hg.1 | plobey                             |
| TC1300008726.hg.1 | TUBBP2                             |
| TC0100017056.hg.1 | foyrobo                            |
| TC0500007844.hg.1 | CTC-564N23.2                       |
| TC1500009596.hg.1 | rumiru                             |
| TC0100017733.hg.1 | TSNAX                              |
| TC1600008366.hg.1 | RP5-991G20.1; RP5-991G20.4; wateri |
| TC0400008428.hg.1 |                                    |
| TC0900009993.hg.1 |                                    |
| TC1500010841.hg.1 | CHRFAM7A                           |
| TC1500010916.hg.1 | UBE2Q2P1                           |
| TC0300012384.hg.1 | H1FX                               |
| TC0600012862.hg.1 |                                    |
| TC1100012741.hg.1 | klawglybu                          |
| TC1500007937.hg.1 | RP11-741G21.1                      |
| TC1100009433.hg.1 | HYLS1                              |
| TC1700009370.hg.1 | fleesker                           |
| TC0100015936.hg.1 |                                    |

|                   |                              |
|-------------------|------------------------------|
| TC0800008268.hg.1 | mohomu                       |
| TC0100008260.hg.1 | CDKN2C                       |
| TC0600008350.hg.1 | BAG2                         |
| TC0500009808.hg.1 |                              |
| TC1200012086.hg.1 | parney                       |
| TC0800008362.hg.1 | varkey                       |
| TC2200007905.hg.1 |                              |
| TC1300006890.hg.1 | EXOSC8                       |
| TC0100011549.hg.1 | FLVCR1                       |
| TC0100015793.hg.1 | POGZ                         |
| TC0900010918.hg.1 | parplawbu                    |
| TC0300009784.hg.1 | muveebo                      |
| TC1800008482.hg.1 | TPGS2                        |
| TC1600010590.hg.1 | RP11-403P17.2; RP11-403P17.6 |
| TC1600010475.hg.1 | CFAP20                       |
| TC0800012235.hg.1 | jorblu                       |
| TC0100015023.hg.1 | DPYD                         |
| TC2200009048.hg.1 |                              |
| TC0100018482.hg.1 | HIST2H2AA4; HIST2H2AA3       |
| TC1800007851.hg.1 | RP11-720L2.2; poso           |
| TC0900006485.hg.1 |                              |
| TC1100008401.hg.1 | zeekarby                     |
| TC1600009250.hg.1 | RP11-127I20.8                |
| TC1200007906.hg.1 | XRCC6BP1                     |
| TC0100015706.hg.1 | AC239868.2                   |
| TC1100011034.hg.1 |                              |
| TC0900008226.hg.1 |                              |
| TC0800008315.hg.1 | zervarby                     |
| TC1900008615.hg.1 | CTC-518B2.12                 |
| TC0700013534.hg.1 | GGCT                         |
| TC0800012198.hg.1 | wawoyby                      |
| TC1700009659.hg.1 |                              |
| TC1700009206.hg.1 |                              |
| TC1900007506.hg.1 | dosha                        |
| TC0200009433.hg.1 | gorgabo                      |
| TC1900012007.hg.1 | NUP62; IL4I1                 |
| TC1700012209.hg.1 | SLC47A1                      |
| TC0400007482.hg.1 |                              |
| TC2100008568.hg.1 | TMPRSS2                      |
| TC0100015552.hg.1 | spazeybo; sperzerbo          |
| TC1200012102.hg.1 | RP11-33N14.3                 |
| TC1800007074.hg.1 | RP11-158H5.8                 |
| TC1900007502.hg.1 | ZNF85                        |



|                                         |                    |
|-----------------------------------------|--------------------|
| TC0300012028.hg.1                       |                    |
| TC0200015448.hg.1                       | teydaw             |
| TC1600010098.hg.1                       |                    |
| TC0100008978.hg.1                       | LRRC8B             |
| TC0600014087.hg.1                       |                    |
| TC1100012002.hg.1                       | MRE11A             |
| TC1700006558.hg.1                       | RP11-135N5.3       |
| TC1700011137.hg.1                       | persler            |
| TC0800007059.hg.1                       | buworby            |
| TC0400007074.hg.1                       |                    |
| TC0700009852.hg.1                       | torjoy             |
| TC1500007056.hg.1                       | ADAL               |
| TC0100015725.hg.1                       | ANP32E             |
| TC0500007044.hg.1                       | CDH6               |
| TC1000011478.hg.1                       | CYP2C8             |
| TC0300008950.hg.1                       | godubu             |
| TC2000007274.hg.1                       |                    |
| TC0100013066.hg.1                       | RP11-108M9.4       |
| TC0900008072.hg.1                       |                    |
| TC0900008078.hg.1                       | RP11-435O5.4       |
| TC17_GL000205v2_random<br>00006441.hg.1 | AC011841.1         |
| TC0100009930.hg.1                       | seykarbo           |
| TC0900011262.hg.1                       | POLE3              |
| TC1800009221.hg.1                       | RBBP8; MIR4741     |
| TC1200009043.hg.1                       | sheygoyby          |
| TC0800011458.hg.1                       | gyverby            |
| TC1700007606.hg.1                       | TAF15              |
| TC0500007468.hg.1                       | swavybo            |
| TC1700007257.hg.1                       | AC087294.2; teeroy |
| TC1200012573.hg.1                       | RHNO1              |
| TC0100007053.hg.1                       |                    |
| TC0X00010357.hg.1                       | GLA                |
| TC1000009065.hg.1                       | FAM45A             |
| TC1700007597.hg.1                       | RP11-1094M14.11    |
| TC0100009621.hg.1                       | PHGDH              |
| TC1700008519.hg.1                       |                    |
| TC0600007259.hg.1                       | U91328.19          |
| TC1100012712.hg.1                       | ACRV1              |
| TC1600007424.hg.1                       | ZG16               |
| TC2000006565.hg.1                       |                    |
| TC1900008499.hg.1                       | gloywu             |
| TC1400008546.hg.1                       | LINC01296; DUXAP10 |

|                   |                            |
|-------------------|----------------------------|
| TC1100009423.hg.1 | ferchor                    |
| TC0700010145.hg.1 |                            |
| TC0200010637.hg.1 | gorgobu                    |
| TC2200007089.hg.1 | slarpoy                    |
| TC0400010887.hg.1 | bygaw                      |
| TC1200009446.hg.1 | jukarby                    |
| TC0300009783.hg.1 |                            |
| TC0400010669.hg.1 | MTCO3P42                   |
| TC0100011273.hg.1 | burabu                     |
| TC1000008937.hg.1 | LOC103344931; RP11-57H14.4 |
| TC2100006455.hg.1 | CH507-254M2.1              |
| TC2100006458.hg.1 | CH507-254M2.2              |
| TC0100017889.hg.1 | LINC01139                  |
| TC0100015710.hg.1 | AC239868.1                 |
| TC0100009876.hg.1 | HIST2H2AA3; HIST2H2AA4     |
| TC1700011302.hg.1 | AC005702.3                 |
| TC0100015963.hg.1 | zeereebu                   |
| TC0100008589.hg.1 | shoypeybu                  |
| TC0600011095.hg.1 | cheyfloyby                 |
| TC1200012786.hg.1 | RP11-350F4.2               |
| TC0100013616.hg.1 |                            |
| TC1800006715.hg.1 | IMPA2                      |
| TC2200007907.hg.1 | MIR3198-1                  |
| TC2000009382.hg.1 |                            |
| TC0600006587.hg.1 | HMG2P28                    |
| TC1400010266.hg.1 |                            |
| TC0400011189.hg.1 | Y_RNA                      |
| TC0700012662.hg.1 |                            |
| TC1600007883.hg.1 | RP11-44F14.9               |
| TC0400008567.hg.1 | zasneeby                   |
| TC0200012651.hg.1 |                            |
| TC0300009258.hg.1 | MME                        |
| TC2200008352.hg.1 | tovaw                      |
| TC2100008051.hg.1 | EZH2P1                     |
| TC1200008008.hg.1 |                            |
| TC0600011404.hg.1 | CCHCR1                     |
| TC0700013375.hg.1 | ZNF273                     |
| TC0900008946.hg.1 |                            |
| TC0700010468.hg.1 | morblar                    |
| TC0100012233.hg.1 | zerkloy                    |
| TC0500010135.hg.1 | gerskeybu                  |
| TC1600008277.hg.1 | SNORD111                   |
| TC0100008644.hg.1 | skernubu                   |

|                   |                |
|-------------------|----------------|
| TC0700006941.hg.1 | NPY            |
| TC0100009234.hg.1 |                |
| TC0800010685.hg.1 | MYBL1          |
| TC2000007627.hg.1 | CSE1L          |
| TC0100009700.hg.1 | SRGAP2D        |
| TC0X00010164.hg.1 | CHMP1B2P       |
| TC1000008746.hg.1 |                |
| TC0700007410.hg.1 | sweesmubu      |
| TC2200007616.hg.1 | neyror         |
| TC1600007411.hg.1 | kleyner        |
| TC0600012646.hg.1 |                |
| TC0100012889.hg.1 | MAD2L2         |
| TC1600010809.hg.1 | TXNL4B         |
| TC0100015923.hg.1 |                |
| TC0800010149.hg.1 |                |
| TC0600008804.hg.1 |                |
| TC1400007446.hg.1 |                |
| TC0200015463.hg.1 | WDR12          |
| TC0600011902.hg.1 |                |
| TC0100013119.hg.1 | MIR1290        |
| TC1200009461.hg.1 | EP400; SNORA49 |
| TC0100013389.hg.1 |                |
| TC1700011264.hg.1 | U3             |
| TC0100009931.hg.1 | gapybu         |
| TC1500006681.hg.1 | PDCD6IPP2      |
| TC1800008735.hg.1 | SNRPGP2        |
| TC2100006498.hg.1 | MTCO1P1        |
| TC0100017665.hg.1 |                |
| TC1500010887.hg.1 | CLN6           |
| TC0900006806.hg.1 | fylee          |
| TC1200008638.hg.1 | RP11-554E23.4  |
| TC1200007011.hg.1 | RP11-282K24.3  |
| TC1900008191.hg.1 | mawber         |
| TC0600013027.hg.1 |                |
| TC1900008121.hg.1 | SNRPA          |
| TC1200011694.hg.1 |                |
| TC0600007240.hg.1 |                |
| TC1600009850.hg.1 | TPRKBP2        |
| TC0900011591.hg.1 | MIR3911        |
| TC0100018058.hg.1 | lorleebo       |
| TC0100013755.hg.1 | RP11-109P14.9  |
| TC0900009646.hg.1 | SCARNA8        |
| TC0400006479.hg.1 | nersperby      |

|                   |                 |
|-------------------|-----------------|
| TC0100015286.hg.1 | jyleybo         |
| TC1900011475.hg.1 | ISOC2           |
| TC0600013352.hg.1 |                 |
| TC0300012648.hg.1 | HMG2P25         |
| TC0Y00006591.hg.1 |                 |
| TC1100011685.hg.1 |                 |
| TC0100014179.hg.1 | sneyboy         |
| TC0400007432.hg.1 |                 |
| TC1600010407.hg.1 | NUDT21          |
| TC1500010846.hg.1 | GOLGA8K; ULK4P1 |
| TC1800007958.hg.1 | RP11-835E18.4   |
| TC0900006484.hg.1 | boyplybu        |
| TC0400012551.hg.1 | DCTD            |
| TC0700011821.hg.1 | SGCE            |
| TC0600010750.hg.1 |                 |
| TC0700010688.hg.1 | neegloyby       |
| TC0900011061.hg.1 |                 |
| TC1000008644.hg.1 | glupuby         |
| TC0100007760.hg.1 | ZMYM1           |
| TC0900009476.hg.1 | talo            |
| TC0200007928.hg.1 | spoydarbu       |
| TC1700006804.hg.1 | PFAS            |
| TC0100014158.hg.1 | smorboy         |
| TC0400008054.hg.1 | soflor          |
| TC0100012817.hg.1 | vuply           |
| TC0X00009581.hg.1 | ELK1            |
| TC0300012885.hg.1 |                 |
| TC0600012883.hg.1 | TUBE1           |
| TC0200016561.hg.1 | KLHL23          |
| TC1000008665.hg.1 | C10orf2         |
| TC0800008269.hg.1 | mohomu          |
| TC0600014095.hg.1 | RPP21           |
| TC0300013568.hg.1 |                 |
| TC0700008330.hg.1 | zawnuby         |
| TC1100006738.hg.1 |                 |
| TC1500009085.hg.1 |                 |
| TC0Y00007152.hg.1 |                 |
| TC1500010848.hg.1 | WHAMMP1         |
| TC0700008539.hg.1 |                 |
| TC0500012937.hg.1 | NOP16           |
| TC1600011407.hg.1 | CMTM1           |
| TC1600011360.hg.1 | SYT17           |
| TC1400008629.hg.1 | wuswer          |

|                         |                                  |
|-------------------------|----------------------------------|
| TC0400006440.hg.1       | fysperby                         |
| TC0600009626.hg.1       | ABRACL                           |
| TC0400011615.hg.1       | RP11-73K9.3                      |
| TC0X00007946.hg.1       | ARMCX4                           |
| TC0400007699.hg.1       | RP11-396M11.1                    |
| TC1100007095.hg.1       | LUZP2                            |
| TC0600007262.hg.1       | HIST1H3A                         |
| TC0100013972.hg.1       | steypobu                         |
| TC1700012077.hg.1       | RP11-498C9.15                    |
| TC0200010735.hg.1       | RP11-566E18.1                    |
| TC0500010078.hg.1       |                                  |
| TC1500010704.hg.1       | CTD-3092A11.2; TCONS_l2_00008519 |
| TC0500007864.hg.1       |                                  |
| TC1600007232.hg.1       | merro                            |
| TSUnmapped00000934.hg.1 |                                  |
| TC0100010659.hg.1       | Y_RNA                            |
| TC0900009513.hg.1       | TMEM261                          |
| TC0900012138.hg.1       | LOC440896; RP11-561O23.5         |
| TC1900006984.hg.1       |                                  |
| TC0100010834.hg.1       |                                  |
| TC1500010913.hg.1       |                                  |
| TC0700010694.hg.1       | NT5C3                            |
| TC0700012019.hg.1       | sparsmeybu                       |
| TC0X00007191.hg.1       | EBP                              |
| TC0X00008395.hg.1       | chuna                            |
| TC1500009200.hg.1       | TTBK2                            |
| TC1000007791.hg.1       | zeynyby                          |
| TC2200008355.hg.1       |                                  |
| TC0600014150.hg.1       | SMIM8                            |
| TC1900007472.hg.1       | AC078899.2                       |
| TC1500008748.hg.1       | slawswo                          |
| TC0500007573.hg.1       | peeploby                         |
| TC0700010902.hg.1       | chertorbo                        |
| TC0600008360.hg.1       | XXbac-BPG55C20.7                 |
| TC0600012645.hg.1       | soglerby                         |
| TC1900009343.hg.1       |                                  |
| TC1700012139.hg.1       |                                  |
| TC1500008281.hg.1       | RNU7-111P                        |
| TC1700012138.hg.1       | RP13-638C3.4                     |
| TC0100006724.hg.1       | RP3-467L1.6                      |
| TC1900007619.hg.1       | ZNF726; ZNF92P3                  |
| TC0300007237.hg.1       | LIMD1                            |
| TC0100007787.hg.1       | nerrawbu                         |

|                   |                       |
|-------------------|-----------------------|
| TC0600007534.hg.1 | PRR3                  |
| TC0700013228.hg.1 |                       |
| TC0200015267.hg.1 | kloyfoybu             |
| TC1700010777.hg.1 | U2                    |
| TC0900007953.hg.1 | CENPP                 |
| TC1300008930.hg.1 | chorwarby             |
| TC1600007568.hg.1 |                       |
| TC2000009623.hg.1 | glawraw               |
| TC1200007931.hg.1 | SLC16A7               |
| TC0700011783.hg.1 | zeynuby               |
| TC0700007473.hg.1 | AC069282.6            |
| TC0300012216.hg.1 | CCDC14                |
| TC1300010017.hg.1 |                       |
| TC0X00010442.hg.1 | TMSB15B; RP11-722G7.1 |
| TC1100010405.hg.1 | LIN7C                 |
| TC1900009943.hg.1 | HAUS8                 |
| TC0600007344.hg.1 | PRSS16                |
| TC0100012203.hg.1 | beemerbu              |
| TC0300013289.hg.1 |                       |
| TC0800007417.hg.1 |                       |
| TC0300012783.hg.1 |                       |
| TC1200011429.hg.1 | AC021887.1            |
| TC0700010148.hg.1 |                       |
| TC0300006669.hg.1 | LSM3                  |
| TC2200007090.hg.1 | bloyvaw               |
| TC0900009489.hg.1 | GLDC                  |
| TC0100008643.hg.1 | skernubu              |
| TC2200008195.hg.1 |                       |
| TC1400010599.hg.1 | TTC6                  |
| TC0600013731.hg.1 | beeflawby             |
| TC0100013165.hg.1 | sorkorbu              |
| TC1200010361.hg.1 | AC046130.1            |
| TC1600010495.hg.1 | wersnar               |
| TC1000008436.hg.1 | kyparby               |
| TC0900010886.hg.1 | PTCH1                 |
| TC1500010610.hg.1 | RP11-6O2.4            |
| TC2200008485.hg.1 | RP11-247I13.6         |
| TC1200008236.hg.1 | RP11-290L1.4          |
| TC0200006698.hg.1 |                       |
| TC0800011063.hg.1 | noyblu                |
| TC0900009406.hg.1 |                       |
| TC0600007265.hg.1 | HIST1H3C              |
| TC0700011962.hg.1 | AZGP1                 |

|                   |                                  |
|-------------------|----------------------------------|
| TC0200009986.hg.1 | ZAK; pk                          |
| TC0300009604.hg.1 | AC007620.3                       |
| TC1800006488.hg.1 | kawklar                          |
| TC1900007554.hg.1 | ZNF729                           |
| TC1200007278.hg.1 | zerblobu                         |
| TC2200008868.hg.1 | movee                            |
| TC0300006437.hg.1 | CHL1                             |
| TC0100012390.hg.1 | LOC729737; RP11-34P13.14         |
| TC0100009195.hg.1 | SLC35A3                          |
| TC1000008896.hg.1 | SMC3                             |
| TC0600011362.hg.1 | pawjor                           |
| TC1700006666.hg.1 | LOC101928000; AC012146.7; kosori |
| TC0100017096.hg.1 | sneymorbo                        |
| TC1100010017.hg.1 | blycher                          |
| TC0300013267.hg.1 |                                  |
| TC0200015331.hg.1 | RP11-84A12.1                     |
| TC0X00010411.hg.1 |                                  |
| TC0700011472.hg.1 | sparzeeby                        |
| TC1100009262.hg.1 | LOC102724301; CTD-2523D13.2      |
| TC1800009138.hg.1 | LINC01029                        |
| TC2000007818.hg.1 | tatora                           |
| TC1200009077.hg.1 |                                  |
| TC0400009677.hg.1 |                                  |
| TC0100013557.hg.1 | SNRNP40                          |
| TC0700010619.hg.1 | SCRN1                            |
| TC0900007239.hg.1 | chutorbu                         |
| TC1700007904.hg.1 | TUBG1                            |
| TC0200010729.hg.1 | XRCC5                            |
| TC0900010913.hg.1 | ZNF367                           |
| TC0400010418.hg.1 | RELL1                            |
| TC0100014657.hg.1 | RP11-181C21.4                    |
| TC1600009515.hg.1 | moseru                           |
| TC0100014503.hg.1 | blorklor                         |
| TC0500010076.hg.1 |                                  |
| TC1400010499.hg.1 | IGHV3-32                         |
| TC0900009001.hg.1 | SNORD62A; SNORD62B               |
| TC0900009002.hg.1 | SNORD62B; SNORD62A               |
| TC1900007640.hg.1 | CTC-459F4.6                      |
| TC0100018013.hg.1 | weewoybo                         |
| TC1500009516.hg.1 | koyzo                            |
| TC1100006739.hg.1 |                                  |
| TC0100012285.hg.1 | fukoybu                          |
| TC1600007593.hg.1 | RP11-586K12.1                    |

|                                  |                                               |
|----------------------------------|-----------------------------------------------|
| TC1200008237.hg.1                | pufawby                                       |
| TC1200009526.hg.1                | nychy                                         |
| TC0300013091.hg.1                |                                               |
| TCUn_GL000195v10000643<br>3.hg.1 | AC011043.2                                    |
| TC1900007536.hg.1                |                                               |
| TC0100014227.hg.1                | MAGOH                                         |
| TC0700012546.hg.1                | forkee                                        |
| TC0900007515.hg.1                |                                               |
| TC0500013231.hg.1                | CATSPER3                                      |
| TC0200015081.hg.1                | pawgeebo                                      |
| TC0600009210.hg.1                |                                               |
| TC0900011152.hg.1                | Y_RNA                                         |
| TC0300012064.hg.1                | sparbobu                                      |
| TC0X00008087.hg.1                | koho                                          |
| TC0900008984.hg.1                | NUP214                                        |
| TC0100016328.hg.1                | ANKRD36BP1                                    |
| TC0300009035.hg.1                | TRPC1                                         |
| TC2000009596.hg.1                | CTCFL                                         |
| TC1900009577.hg.1                | bosey                                         |
| TC0600010962.hg.1                | DEK                                           |
| TC0900012219.hg.1                | CDKN2A                                        |
| TC0100015797.hg.1                | POGZ                                          |
| TC0400007471.hg.1                | nohiru                                        |
| TC1700007629.hg.1                | Y_RNA                                         |
| TC1700007699.hg.1                | Y_RNA                                         |
| TC1000011224.hg.1                |                                               |
| TC1200006995.hg.1                | pleyblybu                                     |
| TC1200010565.hg.1                | RP1-228P16.8                                  |
| TC0900009344.hg.1                | LINC01388; RP11-143M1.3; lawlar; RP11-143M1.4 |
| TC1700008761.hg.1                | RP1-193H18.2                                  |
| TC0800008458.hg.1                | jyveeby                                       |
| TC1200012108.hg.1                | smogoyby                                      |
| TC2200009166.hg.1                | poyblee                                       |
| TSUnmapped00000852.hg.1          |                                               |
| TC0300012356.hg.1                | norvawbo                                      |
| TC0300013636.hg.1                | ACAP2; ACAP2-IT1; AC090018.3                  |
| TC1400007697.hg.1                |                                               |
| TC0X00006816.hg.1                | PKD3                                          |
| TC0400008922.hg.1                | LSM6                                          |
| TC2000008792.hg.1                | MLLT10P1                                      |
| TC1500008743.hg.1                | klawswu                                       |
| TC0900008967.hg.1                | EXOSC2                                        |



|                   |                            |
|-------------------|----------------------------|
| TC1000011357.hg.1 |                            |
| TC1100012032.hg.1 |                            |
| TC2100006444.hg.1 | CH507-145C22.1             |
| TC0100012416.hg.1 | smerrabu                   |
| TC1100011219.hg.1 |                            |
| TC0200013249.hg.1 | LSM3P3                     |
| TC0200013334.hg.1 | AC092651.1                 |
| TC1000008954.hg.1 | CASP7                      |
| TC1900006447.hg.1 |                            |
| TC1900010209.hg.1 | ZNF724P                    |
| TC0X00008953.hg.1 | jarfar                     |
| TC0100015712.hg.1 |                            |
| TC0500008467.hg.1 | SRFBP1                     |
| TC0600009614.hg.1 | jervybo                    |
| TC0700011699.hg.1 | Y_RNA                      |
| TC0300009733.hg.1 | jeemerbu                   |
| TC1900007417.hg.1 | AC004447.2; himere         |
| TC1900011342.hg.1 |                            |
| TC0100016326.hg.1 |                            |
| TC0700011611.hg.1 | RNU6-530P                  |
| TC0900009274.hg.1 | TUBB4B                     |
| TC0700012159.hg.1 | PUS7                       |
| TC0500007415.hg.1 | GPX8                       |
| TC0300012728.hg.1 | PLSCR1                     |
| TC0200008682.hg.1 | TMEM182                    |
| TC0400010167.hg.1 | DCAF16                     |
| TC0200006833.hg.1 | GEN1                       |
| TC0500009637.hg.1 | morflaw                    |
| TC0700009257.hg.1 |                            |
| TC1000008975.hg.1 | CTB-1144G6.5               |
| TC1900010233.hg.1 |                            |
| TC0100008584.hg.1 | ALG6                       |
| TC0400010249.hg.1 | MIR573                     |
| TC1200010872.hg.1 | smunu                      |
| TC1700007376.hg.1 | RP11-192H23.6              |
| TC0100017722.hg.1 | C1orf131                   |
| TC1100009688.hg.1 |                            |
| TC0700006931.hg.1 | FAM221A                    |
| TC1900011383.hg.1 | AC008440.5                 |
| TC0100007026.hg.1 | ARHGEF19-AS1; RP4-733M16.2 |
| TC1700010842.hg.1 | RP11-1072C15.4             |
| TC0500006480.hg.1 |                            |
| TC0200007471.hg.1 | RHOQ                       |

|                   |               |
|-------------------|---------------|
| TC1500009015.hg.1 | AC021231.1    |
| TC1700008712.hg.1 | sworsma       |
| TC1700007788.hg.1 | skeeslu       |
| TC1400008553.hg.1 |               |
| TC1600010767.hg.1 | wyry          |
| TC0800006870.hg.1 | RP11-349F21.4 |
| TC2000006813.hg.1 | MGME1         |
| TC0100006845.hg.1 | Metazoa_SRP   |
| TC0400007799.hg.1 | SLC4A4        |
| TC0100016262.hg.1 |               |
| TC0500009011.hg.1 | klorflo       |
| TC0200016025.hg.1 | LINC00471     |
| TC1900011854.hg.1 | ELAVL1        |
| TC0200008051.hg.1 | hitomo        |
| TC0300010926.hg.1 | stoyveebo     |
| TC0700008703.hg.1 | rakaw         |
| TC0X00008724.hg.1 | HMGB3         |
| TC0600008991.hg.1 | QRSL1         |
| TC1600010564.hg.1 | RP11-256I9.2  |
| TC0800010726.hg.1 |               |
| TC1600009708.hg.1 | zyspar        |
| TC1200011755.hg.1 | NFYB          |
| TC0X00006715.hg.1 | SCML1         |
| TC2000006564.hg.1 |               |
| TC0700009328.hg.1 |               |
| TC1200011695.hg.1 | bartubo       |
| TC1100007026.hg.1 | ZDHHC13       |
| TC0700007200.hg.1 | rochorby      |
| TC0700012801.hg.1 | RNU6-797P     |
| TC1900007517.hg.1 |               |
| TC0100018359.hg.1 | TSNAX         |
| TC1400006821.hg.1 | G2E3          |
| TC1900010543.hg.1 | ZNF829        |
| TC0900009583.hg.1 | swashaw       |
| TC1200009923.hg.1 | klachu        |
| TC0200011196.hg.1 | sluneebo      |
| TC0700006918.hg.1 | chasmabu      |
| TC0600006807.hg.1 | floyreyby     |
| TC0500008133.hg.1 | gorja         |
| TC0700010897.hg.1 | yahore        |
| TC1500007094.hg.1 | RP11-151N17.1 |
| TC1800007131.hg.1 |               |
| TC0900007187.hg.1 | ALDH1B1       |

|                   |                |
|-------------------|----------------|
| TC0600010543.hg.1 |                |
| TC2100007157.hg.1 | shasoy         |
| TC0600011120.hg.1 | U91328.21      |
| TC1900007458.hg.1 | ZNF93          |
| TC0100016638.hg.1 |                |
| TC0500008405.hg.1 |                |
| TC0600006527.hg.1 |                |
| TC0500012491.hg.1 | ZNF300         |
| TC0100012299.hg.1 |                |
| TC0300006742.hg.1 |                |
| TC0100011522.hg.1 | AL360091.1     |
| TC0600006878.hg.1 |                |
| TC0X00007080.hg.1 | AL138744.1     |
| TC0200012855.hg.1 | doydee         |
| TC1100012229.hg.1 | KDELC2         |
| TC1100008192.hg.1 | wamarby        |
| TC0200008071.hg.1 | MTHFD2         |
| TC0600013179.hg.1 | OR2A4          |
| TC0300012572.hg.1 | CEP70          |
| TC1200009629.hg.1 | moygerby       |
| TC0200006678.hg.1 | norfybu        |
| TC1800008281.hg.1 | TMEM241        |
| TC2100006503.hg.1 |                |
| TC0800010356.hg.1 |                |
| TC0700009218.hg.1 | weeke          |
| TC1500010708.hg.1 |                |
| TC1600011042.hg.1 | SLC38A8        |
| TC0100013287.hg.1 | E2F2           |
| TC1400006965.hg.1 | GEMIN2         |
| TC1500010894.hg.1 | SNUPN          |
| TC0100012528.hg.1 | RP4-740C4.7    |
| TC1400006559.hg.1 | germoby        |
| TC0200015146.hg.1 | CACYBPP2       |
| TC0700009483.hg.1 | TAS2R40        |
| TC0500012275.hg.1 | keeskoyby      |
| TC1700010985.hg.1 | RNU6-1152P     |
| TC0100009578.hg.1 |                |
| TC0700012712.hg.1 | LUZP6; MTPN    |
| TC0700011748.hg.1 |                |
| TC1100012715.hg.1 | RP11-680F20.10 |
| TC0700011558.hg.1 | CTB-139P11.2   |
| TC0X00008088.hg.1 | vofor          |
| TC1900009860.hg.1 | smeeglu        |

|                   |               |
|-------------------|---------------|
| TC0600007377.hg.1 | HIST1H2BM     |
| TC1400006697.hg.1 | DHRS2         |
| TC0100006805.hg.1 | RBP7          |
| TC1500007972.hg.1 | CRABP1        |
| TC0600011226.hg.1 | snysneyby     |
| TC0100014191.hg.1 | RAB3B         |
| TC0600009310.hg.1 | GJA1          |
| TC1200011097.hg.1 | RP11-629N8.5  |
| TC0700006898.hg.1 | AC005682.5    |
| TC0600008981.hg.1 | AIM1          |
| TC1900007535.hg.1 | BNIP3P27      |
| TC1600006446.hg.1 | HBA1          |
| TC0200011710.hg.1 | SNORA2        |
| TC1600006445.hg.1 | HBA2          |
| TC1200009867.hg.1 | RP11-599J14.2 |
| TC1200008618.hg.1 | RNY1P16       |
| TC0200011713.hg.1 |               |
| TC1200008569.hg.1 | teychu        |
| TC1600008930.hg.1 | lonor         |
| TC0700006899.hg.1 | SNORD93       |
| TC1900007117.hg.1 | charwy        |
| TC1100008148.hg.1 |               |
| TC0700010455.hg.1 |               |
| TC1800007583.hg.1 | CTD-2541J13.2 |
| TC0800009885.hg.1 | NKX3-1        |
| TC0600011224.hg.1 | HIST1H2BL     |
| TC0600011136.hg.1 | HIST1H2BG     |
| TC0500008777.hg.1 | KIF20A        |
| TC1800008952.hg.1 | DSEL          |
| TC0100014995.hg.1 | CNN3          |
| TC1500008110.hg.1 | RP11-382A20.1 |
| TC1200011710.hg.1 | SYCP3         |
| TC0100014020.hg.1 | peyparbu      |
| TC1200009209.hg.1 | KNTC1         |
| TC0800009958.hg.1 | CHRNA2        |
| TC1100010987.hg.1 | FABP5         |
| TC1200008619.hg.1 |               |
| TC0400006435.hg.1 | AC253576.1    |
| TC1700007947.hg.1 |               |
| TC0400011170.hg.1 | lerflor       |
| TC2100007482.hg.1 | CH507-24F1.1  |
| TC1900008564.hg.1 | ATF5; MIR4751 |
| TC2000007341.hg.1 | FAM83D        |

|                                  |                                |
|----------------------------------|--------------------------------|
| TC0700011050.hg.1                | FIGNL1                         |
| TC1300009240.hg.1                | FABP5P1                        |
| TC0200007942.hg.1                |                                |
| TC0600007285.hg.1                | HIST1H2AE                      |
| TC0700007793.hg.1                | VN1R42P                        |
| TC2100007498.hg.1                | CH507-154B10.2; CH507-145C22.4 |
| TC0300007320.hg.1                | RNU7-128P                      |
| TC0200007773.hg.1                | klukubu                        |
| TC1000012479.hg.1                |                                |
| TC0200008502.hg.1                | NCAPH                          |
| TCUn_GL000220v10000644<br>4.hg.1 |                                |
| TC1000012477.hg.1                | HELLS                          |
| TC0300013074.hg.1                | pergubo                        |
| TC1500009756.hg.1                | BPMS2                          |
| TC2200009017.hg.1                | stofer                         |
| TC1700012391.hg.1                | MYO19                          |
| TC1500009738.hg.1                | KIAA0101; CSNK1G1              |
| TC0700013222.hg.1                | verzerby                       |
| TC0800008080.hg.1                | FABP5                          |
| TC1200011700.hg.1                | RP11-321F8.4                   |
| TC0600011232.hg.1                | HIST1H1B                       |
| TC0500009320.hg.1                | HMMR                           |
| TC0800008417.hg.1                | bawshoy                        |
| TC0100008127.hg.1                | NASP                           |
| TC0100007478.hg.1                |                                |
| TC0900008286.hg.1                | SMC2                           |
| TSUnmapped00000255.hg.1          | KIF15                          |
| TC1200006753.hg.1                |                                |
| TC0500011705.hg.1                | NREP                           |
| TC1000006819.hg.1                | MCM10                          |
| TC1500006733.hg.1                | moyzarbu                       |
| TC0100008677.hg.1                | RP4-694A7.2                    |
| TC1200012666.hg.1                | TMEM19                         |
| TC2100008508.hg.1                | CHAF1B                         |
| TC1200009065.hg.1                | RFC5                           |
| TC0600011184.hg.1                | HIST1H2BJ                      |
| TC0200008331.hg.1                |                                |
| TC1100008199.hg.1                | GAL                            |
| TC2200006467.hg.1                | sotara                         |
| TC0700007788.hg.1                | blusleebu                      |
| TC0900008883.hg.1                | LOC100506100; RP11-545E17.3    |
| TC1400007201.hg.1                | CDKN3                          |

|                         |                           |
|-------------------------|---------------------------|
| TC1400009108.hg.1       | POLE2                     |
| TC0600010949.hg.1       | dawflorby                 |
| TC0X00009336.hg.1       |                           |
| TC0500009812.hg.1       | rarslabu                  |
| TC1600011357.hg.1       |                           |
| TC1600009525.hg.1       |                           |
| TC1700009679.hg.1       | AURKB                     |
| TC2200006607.hg.1       | CDC45                     |
| TC1200008568.hg.1       | TMPO                      |
| TC0600010802.hg.1       | ELOVL2                    |
| TC1100010290.hg.1       | E2F8                      |
| TC0200011902.hg.1       | chaneebo                  |
| TC0100017834.hg.1       | GNG4                      |
| TC2000006629.hg.1       | RP5-967N21.11             |
| TC0100011351.hg.1       | tydy                      |
| TC0400008664.hg.1       | PLK4                      |
| TC1200009673.hg.1       |                           |
| TC0600007610.hg.1       | MSH5; MSH5-SAPCD1; SAPCD1 |
| TC1700008819.hg.1       |                           |
| TC1100010418.hg.1       | KIF18A                    |
| TC1700012284.hg.1       |                           |
| TC0500012670.hg.1       | GABRB2                    |
| TC0500013096.hg.1       | rasloyby                  |
| TC0600011235.hg.1       | HIST1H2AM; HIST1H3J       |
| TC1800008170.hg.1       | AC006557.1                |
| TC0500007143.hg.1       | SKP2                      |
| TC1200011327.hg.1       | CSRP2                     |
| TC1200006767.hg.1       | OVOS                      |
| TC1700012380.hg.1       | SPAG5                     |
| TC1100008049.hg.1       | BANF1                     |
| TC2000007016.hg.1       | GINS1                     |
| TC1600008929.hg.1       |                           |
| TC0400007511.hg.1       | DANCR; MIR4449            |
| TC1600008890.hg.1       |                           |
| TC1100012743.hg.1       |                           |
| TC1500006785.hg.1       | ARHGAP11B; ARHGAP11A      |
| TC0700011969.hg.1       | MCM7                      |
| TCUn_KI270744v100006433 |                           |
| .hg.1                   | AC237676.1                |
| TC0500008054.hg.1       | POLR3G                    |
| TSUnmapped00000825.hg.1 | LINC01297                 |
| TC0500008544.hg.1       | LMNB1                     |
| TC1400008115.hg.1       | RP11-404P21.9             |

|                   |                |
|-------------------|----------------|
| TC0200014404.hg.1 | MCM6           |
| TC0100015550.hg.1 | FAM72C         |
| TC1500010311.hg.1 |                |
| TC1200007641.hg.1 | SCN8A          |
| TC1200011651.hg.1 |                |
| TC0600011233.hg.1 | HIST1H3I       |
| TC1700008626.hg.1 |                |
| TC0500013145.hg.1 |                |
| TC1900011759.hg.1 | APOC1          |
| TC0500011669.hg.1 | GJA1P1         |
| TC1700007501.hg.1 | RP11-640N20.4  |
| TC1200012699.hg.1 | CHPT1          |
| TC0700012960.hg.1 | EZH2           |
| TC1600011280.hg.1 |                |
| TC0300006696.hg.1 | NR2C2          |
| TC2200006641.hg.1 | RANBP1         |
| TC0100017562.hg.1 | RP4-566D2.1    |
| TC0400012644.hg.1 | SORBS2         |
| TC0100009479.hg.1 | DCLRE1B        |
| TC1200011722.hg.1 | PMCH           |
| TC0900007129.hg.1 | MELK           |
| TC1900010159.hg.1 | tertawbu       |
| TC1200009736.hg.1 | nawblabu       |
| TC0700012768.hg.1 |                |
| TC2000009016.hg.1 | DSN1           |
| TC2000006628.hg.1 | MCM8           |
| TC2000006600.hg.1 | PCNA-AS1       |
| TC0400010649.hg.1 | RP11-1281K21.2 |
| TC1500007163.hg.1 | DUT            |
| TC0600009381.hg.1 | CENPW          |
| TC0900007740.hg.1 | RMI1           |
| TC0200008830.hg.1 | LINC01123      |
| TC0600011134.hg.1 | HIST1H4D       |
| TC1000007081.hg.1 | PDSS1          |
| TC1300007038.hg.1 |                |
| TC0700011289.hg.1 |                |
| TC1000006794.hg.1 | DHTKD1         |
| TC1500010612.hg.1 |                |
| TC0100016891.hg.1 | KIF14          |
| TC1900007972.hg.1 | sperwy         |
| TC1200007012.hg.1 | cheenar        |
| TC0600007566.hg.1 |                |
| TC1700012389.hg.1 | LRRRC37A8P     |

|                                  |                                                       |
|----------------------------------|-------------------------------------------------------|
| TC1200007979.hg.1                |                                                       |
| TC0100017094.hg.1                | FAM72A                                                |
| TC0700013119.hg.1                | XRCC2                                                 |
| TC1200012804.hg.1                | PRIM1                                                 |
| TC0300013740.hg.1                | gerstuby                                              |
| TC0700008001.hg.1                |                                                       |
| TC0500007665.hg.1                | CCNB1                                                 |
| TC1700011892.hg.1                | TK1                                                   |
| TC1100008008.hg.1                | POLA2                                                 |
| TCUn_GL000195v10000643<br>5.hg.1 | LOC389831; TCONS_00030034; TCONS_00030035; AC011043.1 |
| TC0100009723.hg.1                | FAM72D                                                |
| TC0700012771.hg.1                | sworbler                                              |
| TC2000008318.hg.1                | FERMT1                                                |
| TC1600007235.hg.1                | PLK1                                                  |
| TC1500009345.hg.1                |                                                       |
| TC0500008454.hg.1                | PRR16                                                 |
| TC2200006461.hg.1                | LA16c-83F12.6                                         |
| TC1600009362.hg.1                | EMP2                                                  |
| TC1900006727.hg.1                | UHRF1                                                 |
| TC1200008005.hg.1                | RASSF3                                                |
| TCUn_GL000195v10000643<br>2.hg.1 | TCONS_00030032                                        |
| TC0400006538.hg.1                | TACC3                                                 |
| TC0400007596.hg.1                | ARL9                                                  |
| TC1300009016.hg.1                |                                                       |
| TC0100012444.hg.1                |                                                       |
| TC1700010472.hg.1                | smoywubu                                              |
| TC0900007845.hg.1                | plawtawbo                                             |
| TC0100015696.hg.1                | HIST2H2BF                                             |
| TC1500008252.hg.1                | FANCI                                                 |
| TC1700007360.hg.1                | TMEM97                                                |
| TC0700011510.hg.1                | RFC2                                                  |
| TC1500010291.hg.1                | NMB                                                   |
| TC0400011721.hg.1                | MAD2L1                                                |
| TC1400010649.hg.1                | VRK1                                                  |
| TC0400011748.hg.1                | CCNA2                                                 |
| TC0100011365.hg.1                |                                                       |
| TC0300011361.hg.1                | shoynubo                                              |
| TC0100009691.hg.1                | RP11-403I13.5                                         |
| TC1000012478.hg.1                | RP11-119K6.6                                          |
| TC0600009534.hg.1                | MYB                                                   |
| TC0700007005.hg.1                | HOXA10-AS                                             |



|                         |                       |
|-------------------------|-----------------------|
| TC0600012038.hg.1       | MCM3                  |
| TC1500008188.hg.1       | CTD-2262B20.1         |
| TC2200009018.hg.1       | swatey                |
| TC0300011278.hg.1       | FAM116A               |
| TC2200006986.hg.1       | blypey                |
| TC0300006575.hg.1       | FANCD2                |
| TC1700010299.hg.1       | CTD-2349P21.11        |
| TC0500007917.hg.1       | zustawby              |
| TC1100010690.hg.1       | klomaw                |
| TC0400009676.hg.1       |                       |
| TC1600007884.hg.1       | RP11-44F14.10         |
| TC1900011760.hg.1       | APOC1P1               |
| TC0100017073.hg.1       | SLC45A3               |
| TC0600011143.hg.1       | HIST1H2APS4           |
| TC0600011228.hg.1       | HIST1H2AK             |
| TC0600011127.hg.1       | HIST1H1C              |
| TC1700007591.hg.1       | E2F3P1                |
| TC1200006561.hg.1       | RAD51AP1              |
| TC0400006994.hg.1       | NCAPG                 |
| TC1700011897.hg.1       |                       |
| TC1800008333.hg.1       | DHFR; DHFRP1          |
| TC1500006999.hg.1       | NUSAP1                |
| TC0300013447.hg.1       | RFC4                  |
| TC0700013290.hg.1       | NCAPG2                |
| TC1900011060.hg.1       | LIG1                  |
| TC1700010763.hg.1       | BRCA1                 |
| TC0300012883.hg.1       | snervawbo             |
| TC2000008917.hg.1       | loytar                |
| TC0300007138.hg.1       | koyfawbo              |
| TC0600007268.hg.1       | HIST1H4C              |
| TC1500010880.hg.1       | TIPIN                 |
| TC1000010686.hg.1       | ZWINT                 |
| TC0900009572.hg.1       | stershaw              |
| TC0700012508.hg.1       |                       |
| TSUnmapped00000627.hg.1 | KIF15                 |
| TC1700009828.hg.1       |                       |
| TC0100015544.hg.1       | HIST2H2BB; HIST2H3PS2 |
| TC0600007383.hg.1       | Z98744.3              |
| TC1200011330.hg.1       | E2F7                  |
| TC1200006452.hg.1       | RNU4ATAC16P           |
| TC1200010882.hg.1       | RP11-973D8.4          |
| TC0800007552.hg.1       | MCM4                  |
| TC1300010018.hg.1       |                       |

|                         |               |
|-------------------------|---------------|
| TC0900006683.hg.1       | sweesper      |
| TC1100011687.hg.1       | RP11-111M22.3 |
| TC1200006627.hg.1       | NCAPD2        |
| TC1600011405.hg.1       | GINS3         |
| TC1300008280.hg.1       | SKA3          |
| TC0500009377.hg.1       | SPDL1         |
| TC1200010277.hg.1       | OVOS2         |
| TSUnmapped00000190.hg.1 | KIF15         |
| TC0600011124.hg.1       | HIST1H3B      |
| TC0600012498.hg.1       | RP11-393I2.2  |
| TC1100012031.hg.1       |               |
| TC0400009396.hg.1       | NEIL3         |
| TC1200008010.hg.1       | gawflubu      |
| TC1400009248.hg.1       | DLGAP5        |
| TC0500010928.hg.1       | CENPK         |
| TC1600008901.hg.1       | stuboby       |
| TC2200006954.hg.1       | HMGB1P10      |
| TC1700009985.hg.1       | sluveebu      |
| TC1000012496.hg.1       | AS3MT         |
| TC2100007949.hg.1       | MIS18A        |
| TC1200011096.hg.1       | buney         |
| TC0100011871.hg.1       | HIST3H2BB     |
| TC0800008726.hg.1       | TBC1D31       |
| TC0500006472.hg.1       | TRIP13        |
| TC0200011885.hg.1       | TTC32         |
| TC0100017298.hg.1       |               |
| TC1700010731.hg.1       | PSMC3IP       |
| TC1600006880.hg.1       | RP11-27M24.1  |
| TC0100008150.hg.1       | RAD54L        |
| TC1800007215.hg.1       | HAUS1         |
| TC1700012199.hg.1       | PIGL          |
| TC0700013289.hg.1       |               |
| TC1600011292.hg.1       | FANCA         |
| TC0300008868.hg.1       | rasmaby       |
| TC1300007248.hg.1       | CKAP2         |
| TC0900006684.hg.1       | veesaby       |
| TC0300009337.hg.1       | SMC4          |
| TC1300007236.hg.1       | FABP5P2       |
| TC0100007216.hg.1       | nokumo        |
| TC0400010750.hg.1       | NMU           |
| TC1100012918.hg.1       |               |
| TC1700010847.hg.1       | GJC1          |
| TC2100007564.hg.1       | SLC25A15P4    |

|                                  |                             |
|----------------------------------|-----------------------------|
| TC0X00006888.hg.1                | CKS1BP6                     |
| TC0200008633.hg.1                |                             |
| TC1600007718.hg.1                | ORC6                        |
| TC0800007065.hg.1                | CDCA2                       |
| TC0600012631.hg.1                | MMS22L                      |
| TC0400007581.hg.1                |                             |
| TC0100007509.hg.1                | spamerbo                    |
| TC1100013111.hg.1                | CHEK1                       |
| TC1900009360.hg.1                | AC005339.2                  |
| TC1300006969.hg.1                | LOC101929140; RP11-74J13.8  |
| TC1400009128.hg.1                | CDKL1                       |
| TC0600011137.hg.1                | AL031777.1                  |
| TC1800006484.hg.1                | NDC80                       |
| TC2100006461.hg.1                | LOC100507412; CH507-513H4.1 |
| TC1500007392.hg.1                | CCNB2                       |
| TC0300010476.hg.1                | SGOL1                       |
| TC0200012713.hg.1                | BCL11A                      |
| TC1700008625.hg.1                | RP11-583F2.2                |
| TC0300008593.hg.1                | soyberbu                    |
| TC1800009289.hg.1                | ACAA2                       |
| TC1700006991.hg.1                | moda                        |
| TC0600010951.hg.1                | spersneybu                  |
| TC1900009826.hg.1                | smertobu                    |
| TC0300006795.hg.1                | SGOL1-AS1                   |
| TC0800011679.hg.1                | ATAD2                       |
| TC0100009020.hg.1                | CDC7                        |
| TC0500007666.hg.1                | CENPH                       |
| TC0100018083.hg.1                | mimaha                      |
| TC1200007217.hg.1                |                             |
| TC0300011173.hg.1                | NT5DC2                      |
| TC1200008131.hg.1                | chuno                       |
| TC2100007487.hg.1                | Y_RNA                       |
| TC2100007504.hg.1                | Y_RNA                       |
| TCUn_GL000195v10000643<br>4.hg.1 | Y_RNA                       |
| TC1000012235.hg.1                | MKI67                       |
| TC0200012297.hg.1                | SRSF7                       |
| TC0300008702.hg.1                | MCM2                        |
| TC1500007549.hg.1                |                             |
| TC1200008544.hg.1                | NEDD1                       |
| TC0400008580.hg.1                |                             |
| TC1000008471.hg.1                | KIF11                       |
| TC1300008079.hg.1                |                             |

|                         |                              |
|-------------------------|------------------------------|
| TC0800007119.hg.1       | ESCO2                        |
| TC1200008113.hg.1       | NUP107                       |
| TC1200006510.hg.1       |                              |
| TSUnmapped00000642.hg.1 | AC254944.3                   |
| TC0600007543.hg.1       | MDC1-AS1; XXbac-BPG27H4.7    |
| TC1900007587.hg.1       |                              |
| TC2200006465.hg.1       | LL22NC03-N64E9.1             |
| TC0100014543.hg.1       | DEPDC1                       |
| TC0200006977.hg.1       | CENPO                        |
| TC1500006938.hg.1       | RP11-133K1.11                |
| TC0200013878.hg.1       | BUB1                         |
| TC2000008279.hg.1       | PCNA                         |
| TC0400009037.hg.1       | MND1                         |
| TC1200007559.hg.1       | TROAP                        |
| TC1100010065.hg.1       | sermer                       |
| TC1200010795.hg.1       | RARG                         |
| TC1700011364.hg.1       | BRIP1                        |
| TC0100011346.hg.1       |                              |
| TC1700009627.hg.1       | YBX2                         |
| TC0400009779.hg.1       | Y_RNA                        |
| TC1800008233.hg.1       |                              |
| TC1200007819.hg.1       | CDK2                         |
| TC0500008309.hg.1       | CAMK4                        |
| TC1200009621.hg.1       | FOXM1                        |
| TC1200008134.hg.1       | YEATS4                       |
| TC2100006510.hg.1       |                              |
| TC1900011696.hg.1       | CTD-2291D10.4                |
| TC0500011280.hg.1       | DHFR                         |
| TC2100006477.hg.1       | LOC100507412; CH507-528H12.1 |
| TC1100013165.hg.1       | SLC43A3                      |
| TC1500009147.hg.1       | torpor                       |
| TC0800009646.hg.1       | farblorby                    |
| TC0700009861.hg.1       |                              |
| TC0100015507.hg.1       | HIST2H3DP1                   |
| TC2100006449.hg.1       | CH507-254M2.3                |
| TC1900007498.hg.1       |                              |
| TC0X00011353.hg.1       | ASB9                         |
| TC0100015563.hg.1       | plawmeybo                    |
| TC0400007714.hg.1       |                              |
| TC1900007116.hg.1       | gugly                        |
| TC1500007699.hg.1       | KIF23                        |
| TC0600011379.hg.1       | MDC1                         |
| TC1100011288.hg.1       | MRPL11                       |

|                                         |                    |
|-----------------------------------------|--------------------|
| TC0100011582.hg.1                       | gornubu            |
| TC1700008066.hg.1                       | vuslaw             |
| TC0100009702.hg.1                       | snuzeybo           |
| TC0600011234.hg.1                       | HIST1H4L           |
| TC0700006605.hg.1                       |                    |
| TC0900009418.hg.1                       | flupawbu           |
| TC0500010515.hg.1                       | NUP155             |
| TC1300006802.hg.1                       | BRCA2              |
| TC1500010421.hg.1                       | RP11-617F23.1      |
| TC0500010655.hg.1                       |                    |
| TC0100014431.hg.1                       | DLEU2_6            |
| TC0200016553.hg.1                       | DAPL1; OR7E89P     |
| TC0500010599.hg.1                       | OXCT1              |
| TC0X00011365.hg.1                       | SSX5               |
| TC17_GL000205v2_random<br>00006440.hg.1 | Y_RNA              |
| TC2100007505.hg.1                       | CH507-338C24.1     |
| TC1500007077.hg.1                       | WDR76              |
| TC1900006628.hg.1                       | NFIC               |
| TC2200009288.hg.1                       | TRMU               |
| TC0200015093.hg.1                       | ZNF385B            |
| TC0100014880.hg.1                       |                    |
| TC1500007781.hg.1                       | zeyper             |
| TC0100013369.hg.1                       | STMN1; MIR3917     |
| TC1700011469.hg.1                       | RP11-927P21.12     |
| TC0400007478.hg.1                       | RP11-1281K21.8     |
| TC1900010144.hg.1                       | CTD-2561J22.5      |
| TC1500010463.hg.1                       | PRC1               |
| TC0800011137.hg.1                       | RAD54B; FSBP       |
| TC2000009026.hg.1                       | RBL1               |
| TC0500013330.hg.1                       |                    |
| TC0600011225.hg.1                       | HIST1H2AJ          |
| TC1100007995.hg.1                       | CDCA5              |
| TC0400012481.hg.1                       |                    |
| TC1500006963.hg.1                       | CASC5              |
| TC0600011451.hg.1                       | RNU6-850P          |
| TC0100015701.hg.1                       | HIST2H3A; HIST2H3C |
| TC0600007266.hg.1                       | HIST1H1C           |
| TC1200012572.hg.1                       | ITFG2              |
| TC0300009975.hg.1                       | flarnarbo          |
| TC0600011917.hg.1                       |                    |
| TC0800008120.hg.1                       | LRRCC1             |
| TC0700010497.hg.1                       | SUMO2P14           |

|                         |                                |
|-------------------------|--------------------------------|
| TC0600013602.hg.1       | FBXO5                          |
| TC0800010980.hg.1       | RP11-98H4.4                    |
| TC0X00007180.hg.1       |                                |
| TC2200007130.hg.1       |                                |
| TC0300006964.hg.1       | nawfubo                        |
| TC2200009167.hg.1       |                                |
| TC1300008291.hg.1       | HIST1H2BPS3                    |
| TC0100012287.hg.1       |                                |
| TC0600012845.hg.1       |                                |
| TC1200012533.hg.1       | POLE                           |
| TC1500007829.hg.1       | LOXL1                          |
| TC0100013455.hg.1       | RPA2                           |
| TC2100007496.hg.1       | CH507-154B10.1; CH507-145C22.3 |
| TC2100006445.hg.1       | Y_RNA                          |
| TC2000007438.hg.1       | MYBL2                          |
| TC1700008438.hg.1       | RAD51C                         |
| TC2000007089.hg.1       | TPX2                           |
| TC0200007999.hg.1       | ZNF638                         |
| TC1200007208.hg.1       | DDX11                          |
| TC2100008307.hg.1       | stogu                          |
| TC0100008057.hg.1       | CDC20                          |
| TSUnmapped00000695.hg.1 | ARHGAP11A                      |
| TC1700011012.hg.1       |                                |
| TC1600007017.hg.1       | CTB-193M12.5                   |
| TC1000008585.hg.1       | MARVELD1                       |
| TC0700013162.hg.1       | PAXIP1                         |
| TC1500009353.hg.1       | CEP152                         |
| TC0700007804.hg.1       | SNORA63                        |
| TC0400009856.hg.1       | LYAR                           |
| TC1500006447.hg.1       | CHEK2P2                        |
| TC0200010484.hg.1       | gaklu                          |
| TC1600010592.hg.1       |                                |
| TC0400009181.hg.1       | RP11-218F10.3                  |
| TC1700009888.hg.1       | CENPV                          |
| TC0400009683.hg.1       | AC092574.2                     |
| TC0100011581.hg.1       | CENPF                          |
| TC0100007045.hg.1       | snurawbo                       |
| TC1700009484.hg.1       | RP11-235E17.4                  |
| TC0X00009606.hg.1       | SSX3                           |
| TC1600008924.hg.1       | POLR3K                         |
| TC1100012030.hg.1       | werchee                        |
| TC0300006720.hg.1       |                                |
| TC1600007177.hg.1       | leypo                          |

|                   |                       |
|-------------------|-----------------------|
| TC1100012948.hg.1 | IFITM2                |
| TC0700007198.hg.1 | ANLN                  |
| TC0100015705.hg.1 |                       |
| TC0100016441.hg.1 | CENPL                 |
| TC0100006443.hg.1 | storubu               |
| TC1700010451.hg.1 | RDM1                  |
| TC2200007838.hg.1 | AC116618.1            |
| TC1000012564.hg.1 | DNAJC9                |
| TC1100009657.hg.1 | IFITM3                |
| TC0300009524.hg.1 | ECT2                  |
| TC0700007349.hg.1 | stawblar              |
| TC1100013021.hg.1 | FEN1                  |
| TC1400009242.hg.1 | WDHD1                 |
| TC0100009877.hg.1 | HIST2H3A              |
| TC1600010591.hg.1 |                       |
| TC1500009934.hg.1 | RP11-673C5.1          |
| TC1300006847.hg.1 | RFC3                  |
| TC0100010397.hg.1 | NUF2                  |
| TC0100008023.hg.1 | PPIH                  |
| TC0600011185.hg.1 | HIST1H2BK             |
| TC0500010514.hg.1 | CTD-2124B8.2          |
| TC1600009922.hg.1 |                       |
| TC1000008482.hg.1 | CEP55                 |
| TC1100012513.hg.1 | H2AFX                 |
| TC1000008385.hg.1 | STAMBPL1              |
| TC0900006736.hg.1 | CNTLN                 |
| TC1700009204.hg.1 | RP11-498C9.16         |
| TC1400007173.hg.1 | RP11-589M4.1; tawwobo |
| TC0400012620.hg.1 | CENPU                 |
| TC1700012265.hg.1 | MEIOC                 |
| TC0600007380.hg.1 | HIST1H2AL; HIST1H2BN  |
| TC2200008847.hg.1 | CENPM                 |
| TC0100013426.hg.1 | snoymerbo             |
| TC0200007558.hg.1 | AC007682.2            |

**Supplementary Table 4** Hypothesized theoretical mass transitions for KCI807 potential metabolites with a single chemical modification

| Modification    | Form     | Mass shifted from KCI807 | Hypothesized Q1 | Hypothesized Q3 |        |      |
|-----------------|----------|--------------------------|-----------------|-----------------|--------|------|
|                 |          |                          |                 | Q3-1            | Q3-2   | Q3-3 |
| Glucuronidation | +C6H8O6  | 176.03                   | 431.09          | 255             | 313.03 | 137  |
| methylation     | +CH2     | 14.02                    | 267.07          | 255             | 151.02 | 137  |
| oxidation       | +O       | 15.99                    | 271.05          | -               | 153    | 137  |
| reduction       | -O       | -15.99                   | 239.07          | -               | 121.02 | 137  |
| glycosylation   | +C6H10O5 | 162                      | 417.11          | 255             | 299.05 | 137  |
| acetylation     | +C2H2O   | 42.01                    | 299.07          | 255             | 179.02 | 137  |
| Sulfation       | +O3S     | 79.96                    | 335.02          | 255             | 216.97 | 137  |

Q1, mass charge ratio for the parent ion of the metabolite; Q3, mass charge ratio for the product ion of the metabolite



**Supplementary Table 5** Hypothesized theoretical mass transitions for KCI807 potential metabolites with double chemical modifications

| Modifications           | Form       | Mass shifted | Hypothesized Q1 | Hypothesized Q3 |        |        |        |        |      |
|-------------------------|------------|--------------|-----------------|-----------------|--------|--------|--------|--------|------|
|                         |            |              |                 | Q3-1            | Q3-2   | Q3-3   | Q3-4   | Q3-5   | Q3-6 |
| Glucuronide-glucuronide | +C12H16O12 | 352.06       | 607.12          | 431.09          | N/A    | 255.06 | 313.03 | N/A    | 137  |
| Glucuronide-sulfate     | +C6H8O9S   | 255.99       | 511.05          | 335.02          | 431.09 | 255.06 | 313.03 | 216.96 | 137  |
| Glucuronide-glycosylate | +C12H18O11 | 338.03       | 593.09          | 417.06          | 431.09 | 255.06 | 313.03 | 299    | 137  |
| Sulfate-glycosylate     | +C6H10O8S  | 241.96       | 497.02          | 417.06          | 335.02 | 255.06 | 216.96 | 299    | 137  |

Q1, mass charge ratio for the parent ion of the metabolite; Q3, mass charge ratio for the product ion of the metabolite
